# Supplementary material
Source: PubMed Central journal article supplement (PMC9242673)

## Supporting Information

### Chemoenzymatic Synthesis of Sialosides Containing 7-*N*- or 7,9-Di-*N*-acetyl Sialic Acid as Stable *O*-Acetyl Analogues for Probing Sialic Acid-Binding Proteins

Anoopjit Singh Kooner,<sup>†</sup> Sandra Diaz,<sup>‡,§</sup> Hai Yu,<sup>†</sup> Abhishek Santra,<sup>†,||</sup> Ajit Varki,<sup>‡,§</sup> and Xi Chen<sup>†,\*</sup>

<sup>†</sup>Department of Chemistry, University of California, Davis, California, 95616, United States

<sup>‡</sup>Department of Medicine, University of California, San Diego, California, 92093, United States

<sup>§</sup>Department of Cellular & Molecular Medicine, Glycobiology Research and Training Center, University of California, San Diego, California, 92093, United States

<sup>||</sup>Current Address: Department of Organic Synthesis and Process Chemistry, CSIR-Indian Institute of Chemical Technology (CSIR-IICT), Hyderabad 500007, India

\*Corresponding author: Email: [xiichen@ucdavis.edu](mailto:xiichen@ucdavis.edu)

#### Table of content

|                                                                                                                                     |        |
|-------------------------------------------------------------------------------------------------------------------------------------|--------|
| <b>Table S1.</b> Glycan microarray study results.....                                                                               | S2–S3  |
| <sup>1</sup> H and <sup>13</sup> C{ <sup>1</sup> H} NMR spectra of <b>4–5</b> , <b>7–11</b> , <b>14–23</b> , and <b>25–82</b> ..... | S4–S78 |

**Table S1.** Glycan microarray study results (See **Figure 3** for the corresponding bar figure). R1 = ProNH<sub>2</sub>.

|          | Glycans                                | hSiglec 7  | hSiglec 9   | SNA       | MAL II    |
|----------|----------------------------------------|------------|-------------|-----------|-----------|
|          |                                        | Av±SD      | Av±SD       | Av±SD     | Av±SD     |
| <b>A</b> | Neu5Acα3Galβ4GlcβR1                    | 3873±236   | 44638±3098  | 70±22     | 82±16     |
|          | Neu5,9Ac <sub>2</sub> α3Galβ4GlcβR1    | 128±45     | 12452±2402  | 28±11     | 2449±2487 |
|          | Neu5Ac9NAcα3Galβ4GlcβR1                | 74±5       | 3598±1128   | 13±2      | 44±10     |
|          | Neu5Ac7NAcα3Galβ4GlcβR1                | 32±13      | 233±31      | 23±4      | 24±3      |
|          | Neu5Ac7,9diNAcα3Galβ4GlcβR1            | 33±12      | 123±36      | 16±4      | 23±6      |
|          | Galβ4GlcβR1                            | 86±57      | 455±85      | 20±5      | 61±17     |
| <b>B</b> | Neu5Acα6Galβ4GlcβR1                    | 18232±769  | 35090±11846 | 1071±1068 | 1456±245  |
|          | Neu5,9Ac <sub>2</sub> α6Galβ4GlcβR1    | 82±21      | 763±332     | 5070±300  | 65±3      |
|          | Neu5Ac9NAcα6Galβ4GlcβR1                | 1289±104   | 3074±355    | 1773±112  | 52±7      |
|          | Neu5Ac7NAcα6Galβ4GlcβR1                | 57±14      | 365±205     | 151±37    | 22±2      |
|          | Neu5Ac7,9diNAcα6Galβ4GlcβR1            | 24±5       | 137±8       | 358±76    | 30±20     |
|          | Galβ4GlcβR1                            | 86±57      | 455±85      | 20±5      | 61±17     |
| <b>C</b> | Neu5Acα3Galβ4GlcNAcβR1                 | 3316±442   | 43732±12044 | 24±1      | 339±276   |
|          | Neu5,9Ac <sub>2</sub> α3Galβ4GlcNAcβR1 |            |             |           |           |
|          | Neu5Ac9NAcα3Galβ4GlcNAcβR1             | 17±14      | 414±350     | 8±2       | 73±17     |
|          | Neu5Ac7NAcα3Galβ4GlcNAcβR1             | 40±8       | 248±26      | 20±1      | 21±3      |
|          | Neu5Ac7,9diNAcα3Galβ4GlcNAcβR1         | 20±1       | 101±18      | 15±4      | 20±5      |
|          | Galβ4GlcNAcβR1                         | 111±18     | 316±40      | 96±16     | 81±10     |
| <b>D</b> | Neu5Acα6Galβ4GlcNAcβR1                 | 16232±1719 | 54607±2394  | 4170±682  | 58±11     |
|          | Neu5,9Ac <sub>2</sub> α6Galβ4GlcNAcβR1 | 18675±1057 | 48835±6066  | 5452±1564 | 19±2      |
|          | Neu5Ac9NAcα6Galβ4GlcNAcβR1             | 574±63     | 7438±1391   | 3794±309  | 43±6      |
|          | Neu5Ac7NAcα6Galβ4GlcNAcβR1             | 32±10      | 324±98      | 97±23     | 403±232   |
|          | Neu5Ac7,9diNAcα6Galβ4GlcNAcβR1         | 24±9       | 75±80       | 56±11     | 20±3      |
|          | Galβ4GlcNAcβR1                         | 111±18     | 316±40      | 96±16     | 81±10     |
| <b>E</b> | Neu5Acα6GalNAcαR1                      | 30069±3743 | 38633±4875  | 236±18    | 164±47    |
|          | Neu5,9Ac <sub>2</sub> α6GalNAcαR1      | 15931±4038 | 22398±2008  | 56±6      | 48±9      |
|          | Neu5Ac9NAcα6GalNAcαR1                  | 2180±301   | 1506±471    | 28±4      | 22±3      |
|          | Neu5Ac7NAcα6GalNAcαR1                  | 37±10      | 291±106     | 12±3      | 12±4      |
|          | Neu5Ac7,9diNAcα6GalNAcαR1              | 27±12      | 87±18       | 15±5      | 16±17     |
|          | GalNAcαR1                              | 47±9       | 179±100     | 32±4      | 42±4      |
| <b>F</b> | Neu5Acα3Galβ3GlcNAcβR1                 | 1325±212   | 32721±1974  | 40±11     | 662±86    |
|          | Neu5,9Ac <sub>2</sub> α3Galβ3GlcNAcβR1 | 33±8       | 483±140     | 65±4      | 208±52    |
|          | Neu5Ac9NAcα3Galβ3GlcNAcβR1             | 80±11      | 1008±97     | 24±9      | 18±4      |
|          | Neu5Ac7NAcα3Galβ3GlcNAcβR1             | 36±14      | 189±34      | 23±1      | 23±3      |
|          | Neu5Ac7,9diNAcα3Galβ3GlcNAcβR1         | 19±5       | 138±81      | 13±1      | 15±2      |
|          | Galβ3GlcNAcβR1                         | 53±14      | 232±24      | 29±9      | 114±17    |
| <b>G</b> | Neu5Acα6Galβ3GlcNAcβR1                 | 22346±3694 | 45726±10343 | 249±90    | 27±9      |
|          | Neu5,9Ac <sub>2</sub> α6Galβ3GlcNAcβR1 |            |             |           |           |
|          | Neu5Ac9NAcα6Galβ3GlcNAcβR1             | 774±72     | 1542±238    | 897±72    | 36±8      |
|          | Neu5Ac7NAcα6Galβ3GlcNAcβR1             | 35±10      | 230±156     | 30±12     | 16±7      |
|          | Neu5Ac7,9diNAcα6Galβ3GlcNAcβR1         | 17±12      | 60±18       | 25±2      | 19±1      |
|          | Galβ3GlcNAcβR1                         | 53±14      | 232±24      | 29±9      | 114±17    |

|          | Glycans                        | hSiglec 7 | hSiglec 9  | SNA    | MAL II     |
|----------|--------------------------------|-----------|------------|--------|------------|
|          |                                | Av±SD     | Av±SD      | Av±SD  | Av±SD      |
| <b>H</b> | Neu5Acα3Galβ3GlcNAcαR1         | 858±249   | 11809±2780 | 34±4   | 915±256    |
|          | Neu5,9Ac2α3Galβ3GlcNAcαR1      |           |            |        |            |
|          | Neu5Ac9NAcα3Galβ3GlcNAcαR1     | 92±21     | 702±135    | 22±5   | 29±2       |
|          | Neu5Ac7NAcα3Galβ3GlcNAcαR1     | 33±11     | 160±42     | 34±5   | 53±3       |
|          | Neu5Ac7,9diNAcα3Galβ3GlcNAcβR1 | 49±21     | 75±8       | 14±4   | 16±5       |
|          | Galβ3GlcNAcαR1                 |           |            |        |            |
| <b>I</b> | Neu5Acα6Galβ3GlcNAcαR1         |           |            |        |            |
|          | Neu5,9Ac2α6Galβ3GlcNAcαR1      |           |            |        |            |
|          | Neu5Ac9NAcα6Galβ3GlcNAcαR1     | 1114±295  | 3071±723   | 384±88 | 214±270    |
|          | Neu5Ac7NAcα6Galβ3GlcNAcαR1     | 28±7      | 229±24     | 66±10  | 23±3       |
|          | Neu5Ac7,9diNAcα6Galβ3GlcNAcαR1 | 33±5      | 133±40     | 39±6   | 16±3       |
|          | Galβ3GlcNAcαR1                 |           |            |        |            |
| <b>J</b> | Neu5Acα3Galβ3GalNAcβR1         | 1580±329  | 32410±5066 | 27±10  | 17200±1879 |
|          | Neu5,9Ac2α3Galβ3GalNAcβR1      | 58±15     | 271±119    | 99±11  | 34276±4340 |
|          | Neu5Ac9NAcα3Galβ3GalNAcβR1     | 19±7      | 244±116    | 14±2   | 16576±3253 |
|          | Neu5Ac7NAcα3Galβ3GalNAcβR1     | 2158±2198 | 4010±416   | 375±24 | 778±499    |
|          | Neu5Ac7,9diNAcα3Galβ3GalNAcβR1 | 52±35     | 259±97     | 37±4   | 47±5       |
|          | Galβ3GalNAcβR1                 | 55±9      | 212±42     | 25±4   | 57±8       |
| <b>K</b> | Neu5Acα6Galβ3GalNAcβR1         | 11743±694 | 28518±4248 | 11±8   | 11±7       |
|          | Neu5,9Ac2α6Galβ3GalNAcβR1      |           |            |        |            |
|          | Neu5Ac9NAcα6Galβ3GalNAcβR1     | 1924±431  | 1229±394   | 135±18 | 695±125    |
|          | Neu5Ac7NAcα6Galβ3GalNAcβR1     | 35±4      | 124±29     | 27±6   | 32±4       |
|          | Neu5Ac7,9diNAcα6Galβ3GalNAcβR1 | 28±5      | 136±111    | 16±2   | 15±3       |
|          | Galβ3GalNAcβR1                 | 55±9      | 212±42     | 25±4   | 57±8       |
| <b>L</b> | Neu5Acα3Galβ3GalNAcαR1         | 1868±177  | 10988±4120 | 37±8   | 45417±4854 |
|          | Neu5,9Ac2α3Galβ3GalNAcαR1      | 121±120   | 154±89     | 87±25  | 34313±4699 |
|          | Neu5Ac9NAcα3Galβ3GalNAcαR1     | 16±5      | 84±32      | 7±3    | 16570±2600 |
|          | Neu5Ac7NAcα3Galβ3GalNAcαR1     | 36±11     | 145±62     | 16±2   | 30441±1702 |
|          | Neu5Ac7,9diNAcα3Galβ3GalNAcαR1 | 37±5      | 202±102    | 34±3   | 14694±1436 |
|          | Galβ3GalNAcαR1                 | 66±17     | 338±29     | 13±4   | 46±4       |
| <b>M</b> | Neu5Acα6Galβ3GalNAcαR1         |           |            |        |            |
|          | Neu5,9Ac2α6Galβ3GalNAcαR1      |           |            |        |            |
|          | Neu5Ac9NAcα6Galβ3GalNAcαR1     | 258±40    | 1414±167   | 148±2  | 26±14      |
|          | Neu5Ac7NAcα6Galβ3GalNAcαR1     | 22±3      | 115±12     | 24±7   | 21±2       |
|          | Neu5Ac7,9diNAcα6Galβ3GalNAcαR1 | 26±6      | 83±46      | 11±3   | 9±1        |
|          | Galβ3GalNAcαR1                 | 66±17     | 338±29     | 13±4   | 46±4       |

400 MHz  $^1\text{H}$  and 100 MHz  $^{13}\text{C}\{^1\text{H}\}$  NMR spectra of Neu5Ac7NAc (**4**) in  $\text{D}_2\text{O}$

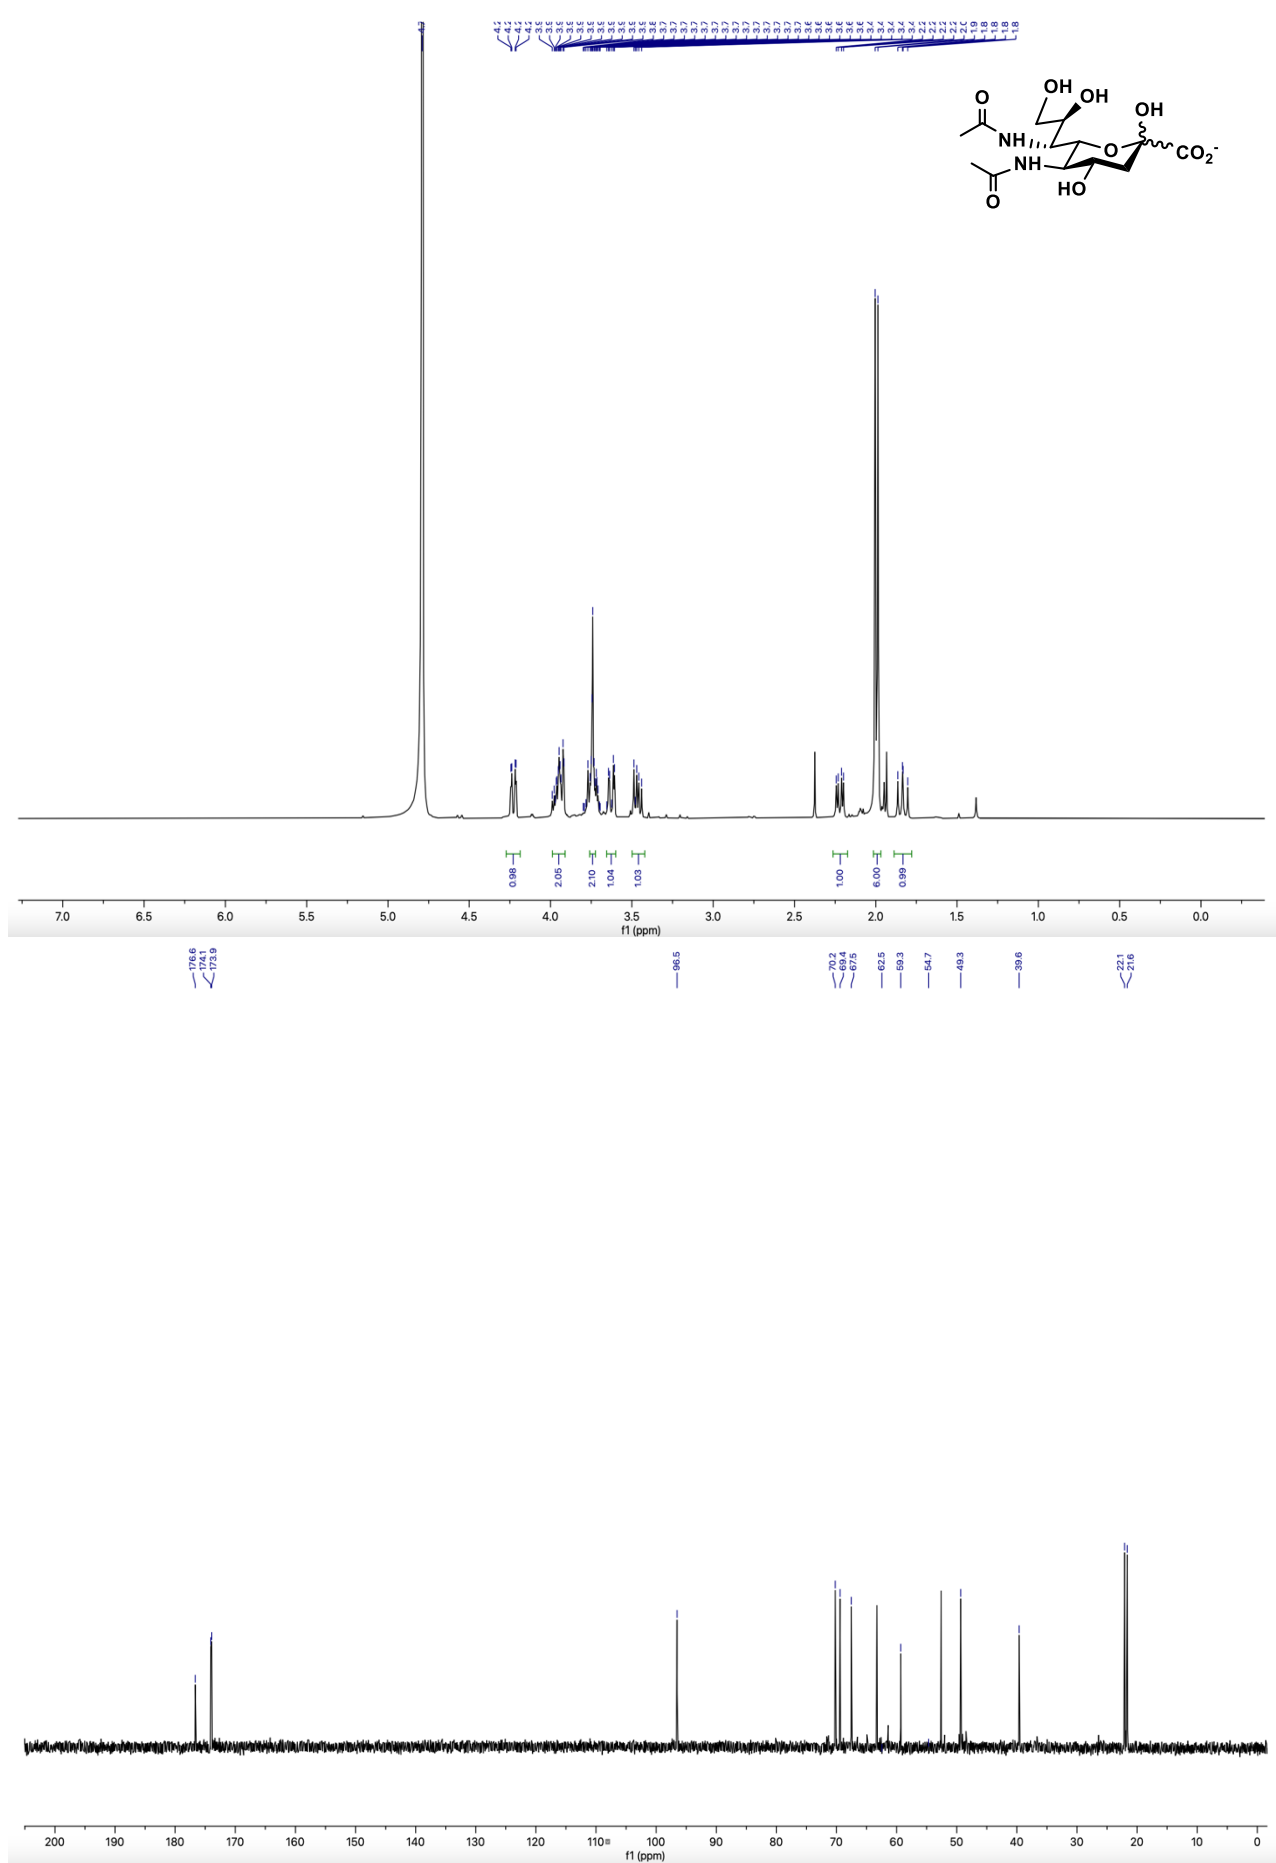

600 MHz  $^1\text{H}$  and 150 MHz  $^{13}\text{C}\{^1\text{H}\}$  NMR spectra of Neu5,7diN<sub>3</sub> (**5**) in D<sub>2</sub>O

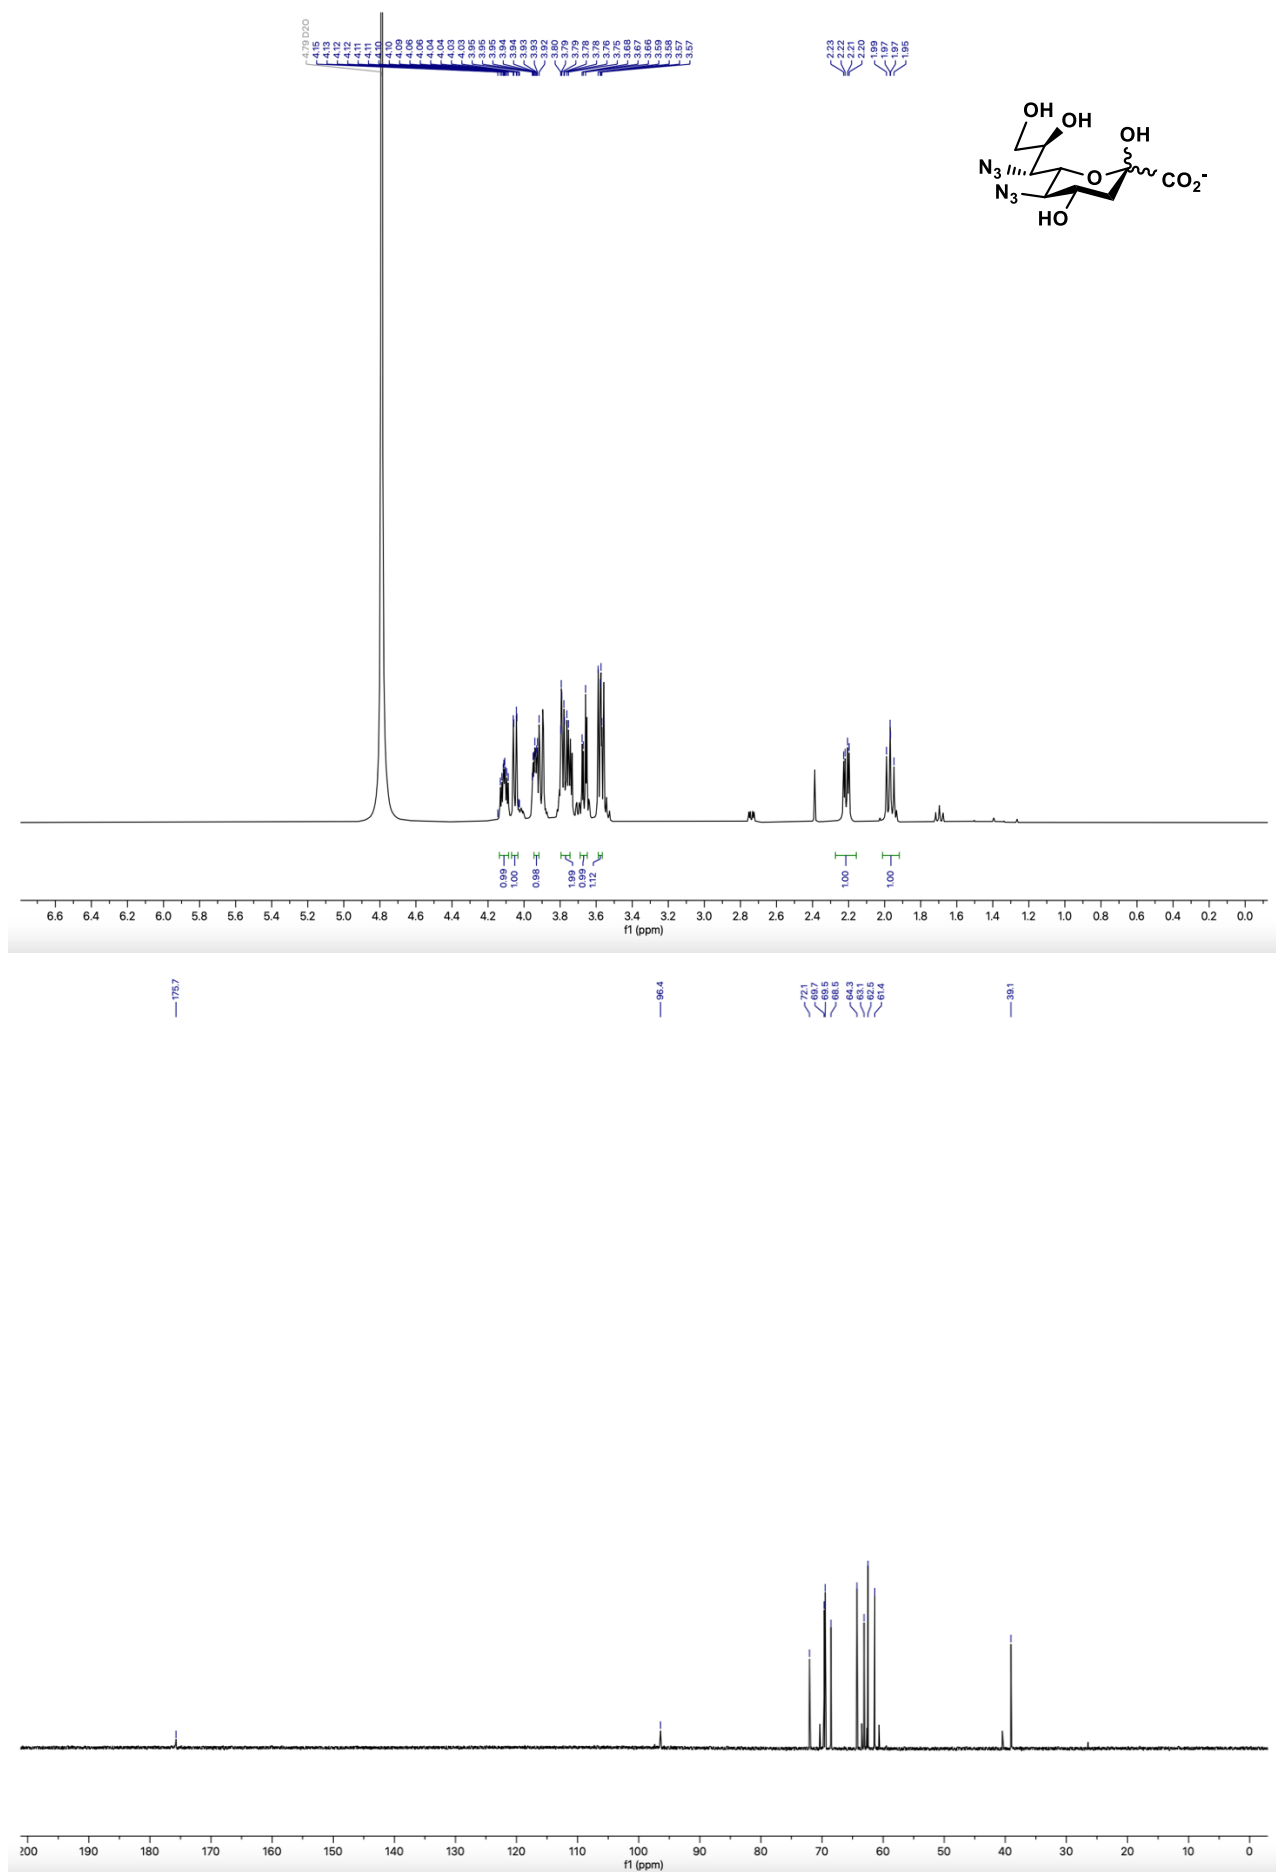



800 MHz  $^1\text{H}$  and 200 MHz  $^{13}\text{C}\{^1\text{H}\}$  NMR spectra of 2,4-diacetamido-2,4-dideoxy-D-mannopyranose (Man2,4diNAc, **8**) in  $\text{D}_2\text{O}$

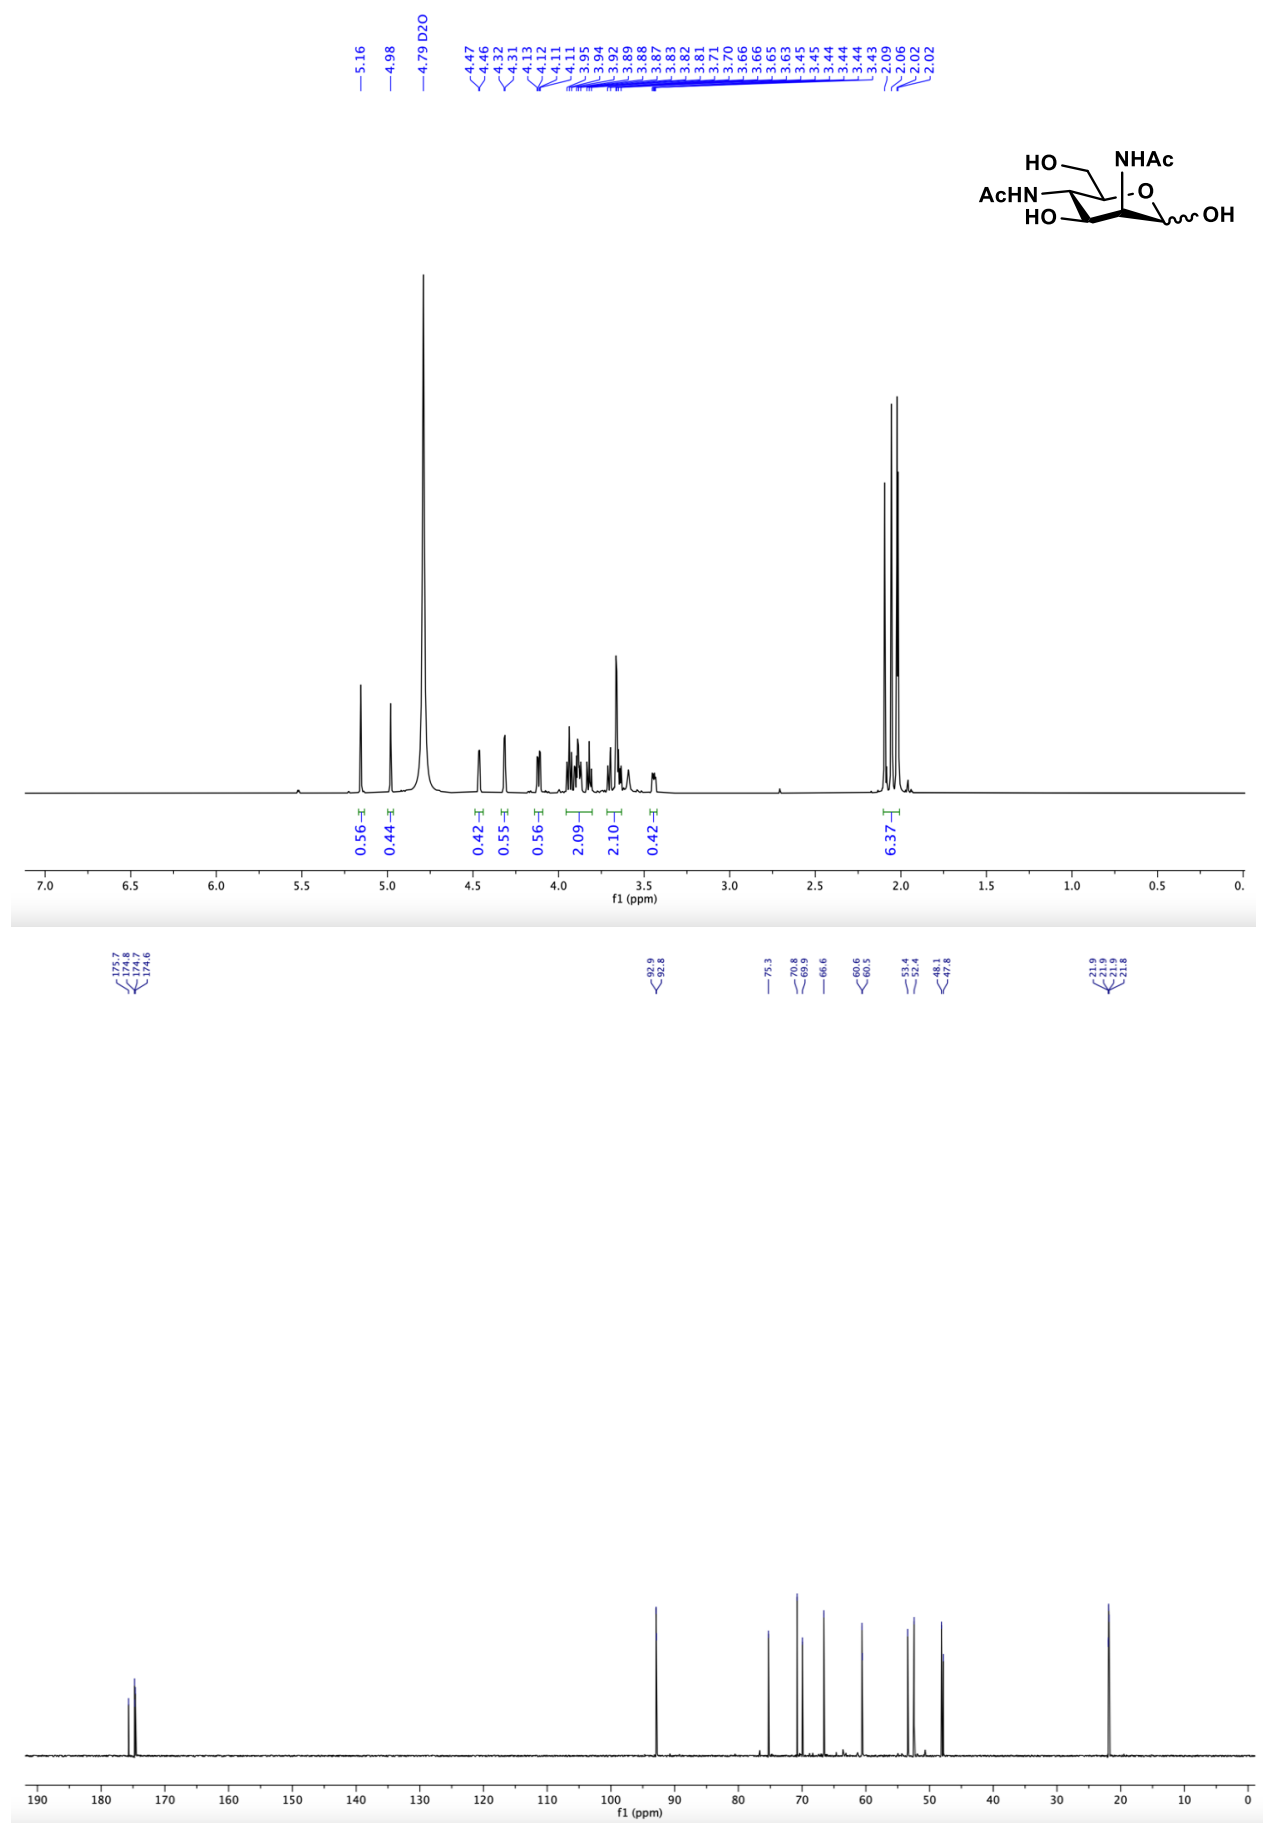

800 MHz  $^1\text{H}$  and 200 MHz  $^{13}\text{C}\{^1\text{H}\}$  NMR spectra of 2,4-diaziido-2,4-dideoxy-D-mannopyranose (Man2,4diN<sub>3</sub>, **9**) in D<sub>2</sub>O

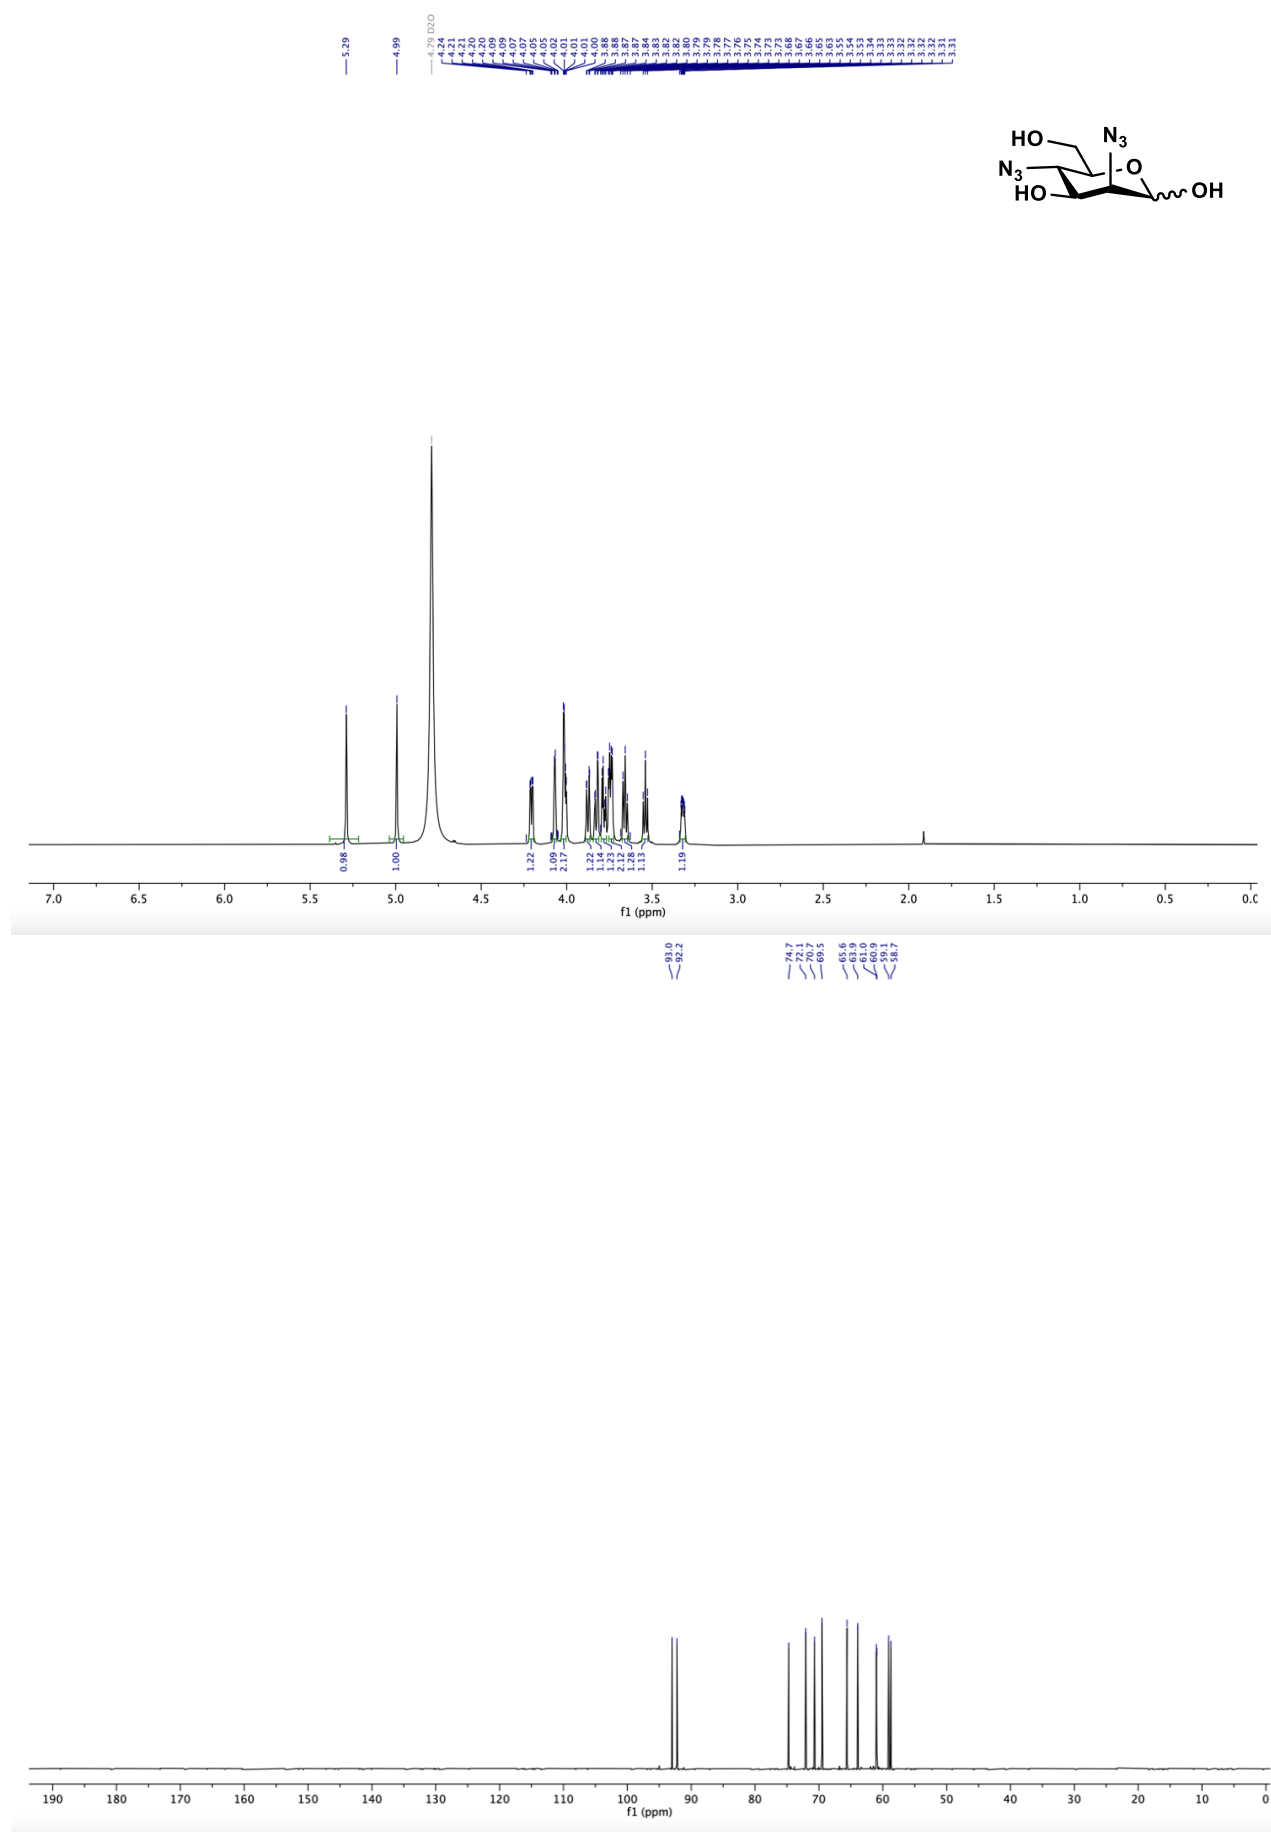



400 MHz  $^1\text{H}$  and 200 MHz  $^{13}\text{C}\{^1\text{H}\}$  NMR spectra of 2,4,6-triacetamido-2,4,6-trideoxy-D-mannopyranose (Man2,4,6triNAc, **10**) in  $\text{D}_2\text{O}$

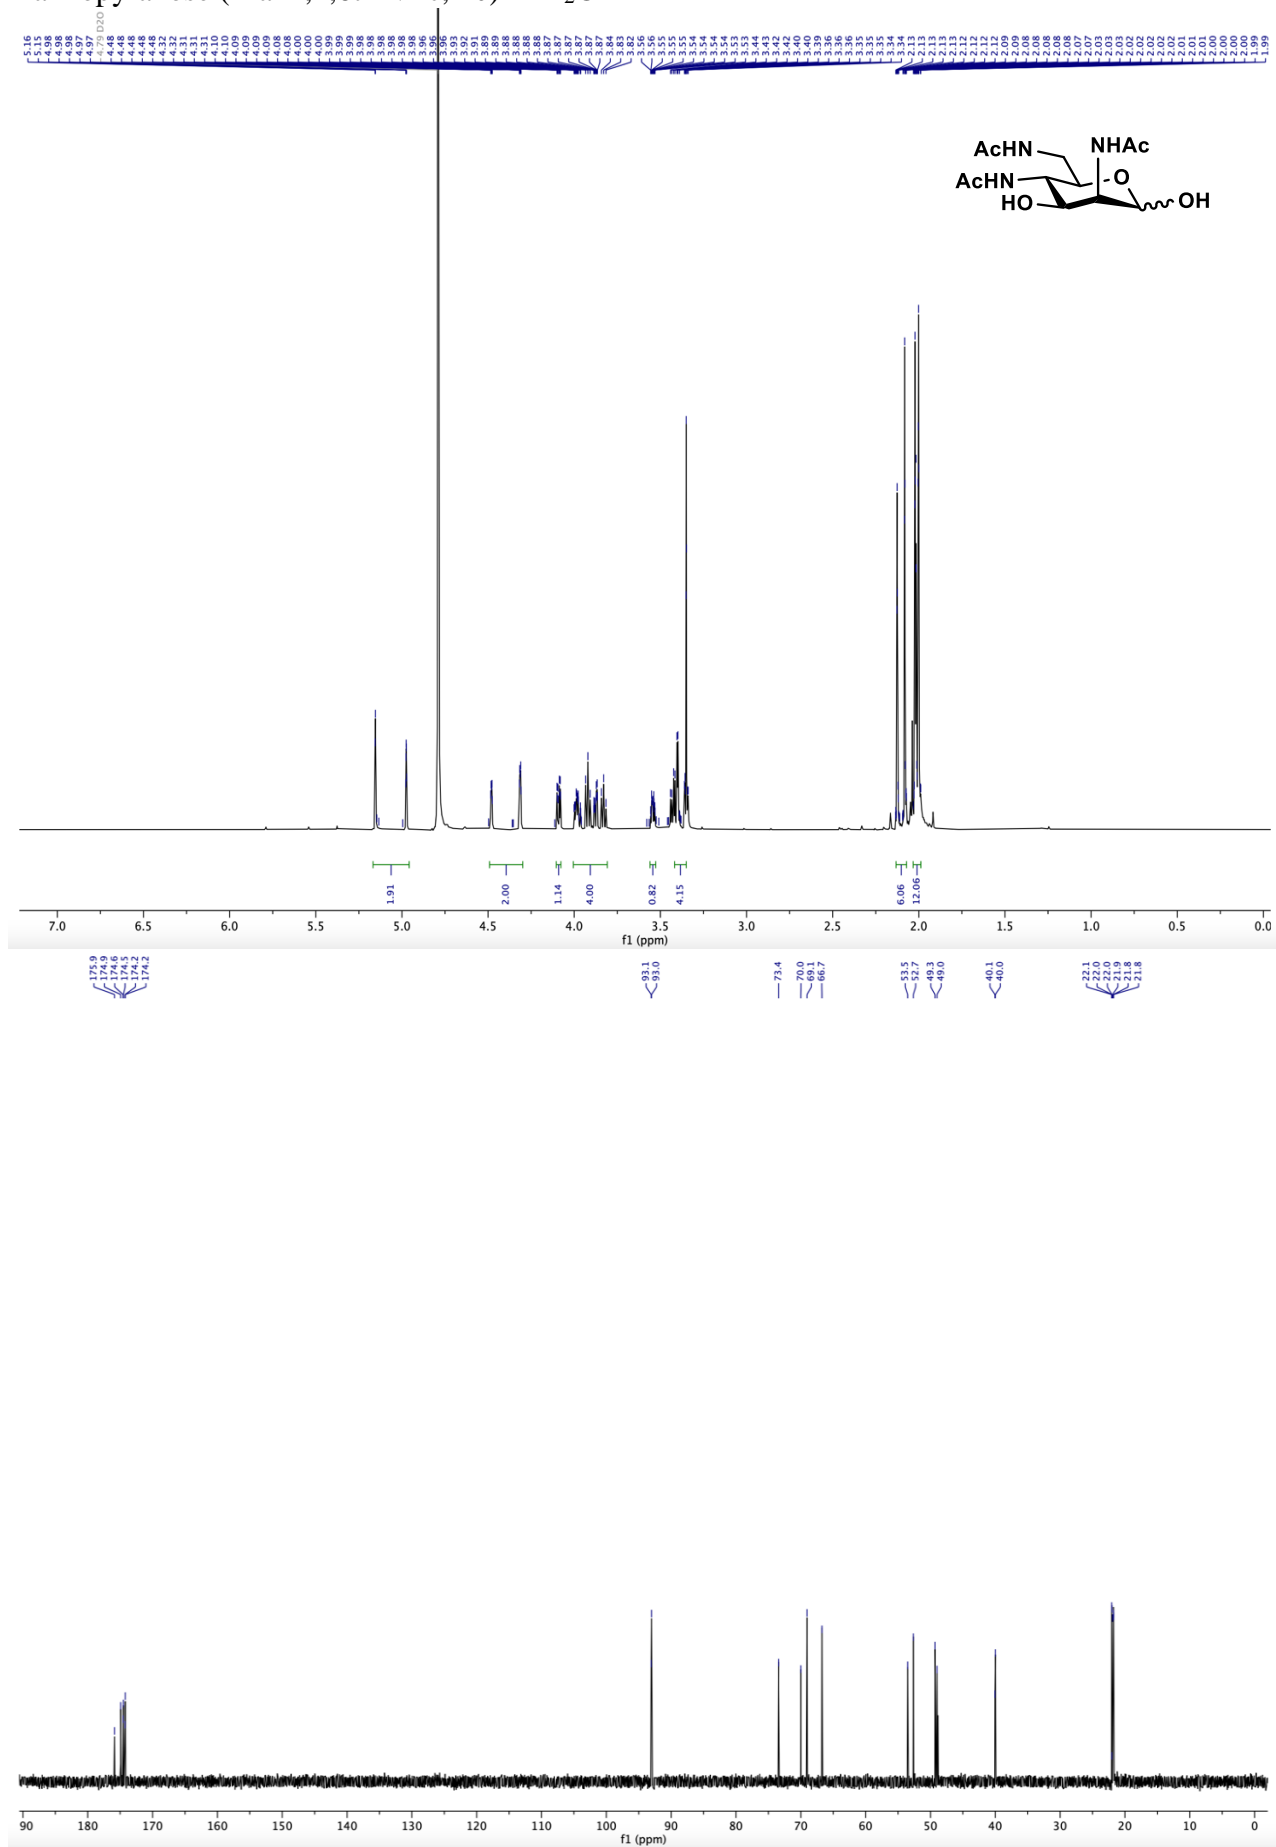

400 MHz  $^1\text{H}$  and 200 MHz  $^{13}\text{C}\{^1\text{H}\}$  NMR spectra of 2,4,6-triazido-2,4,6-trideoxy-D-mannopyranose (Man2,4,6triN<sub>3</sub>, **11**) in CD<sub>3</sub>OD

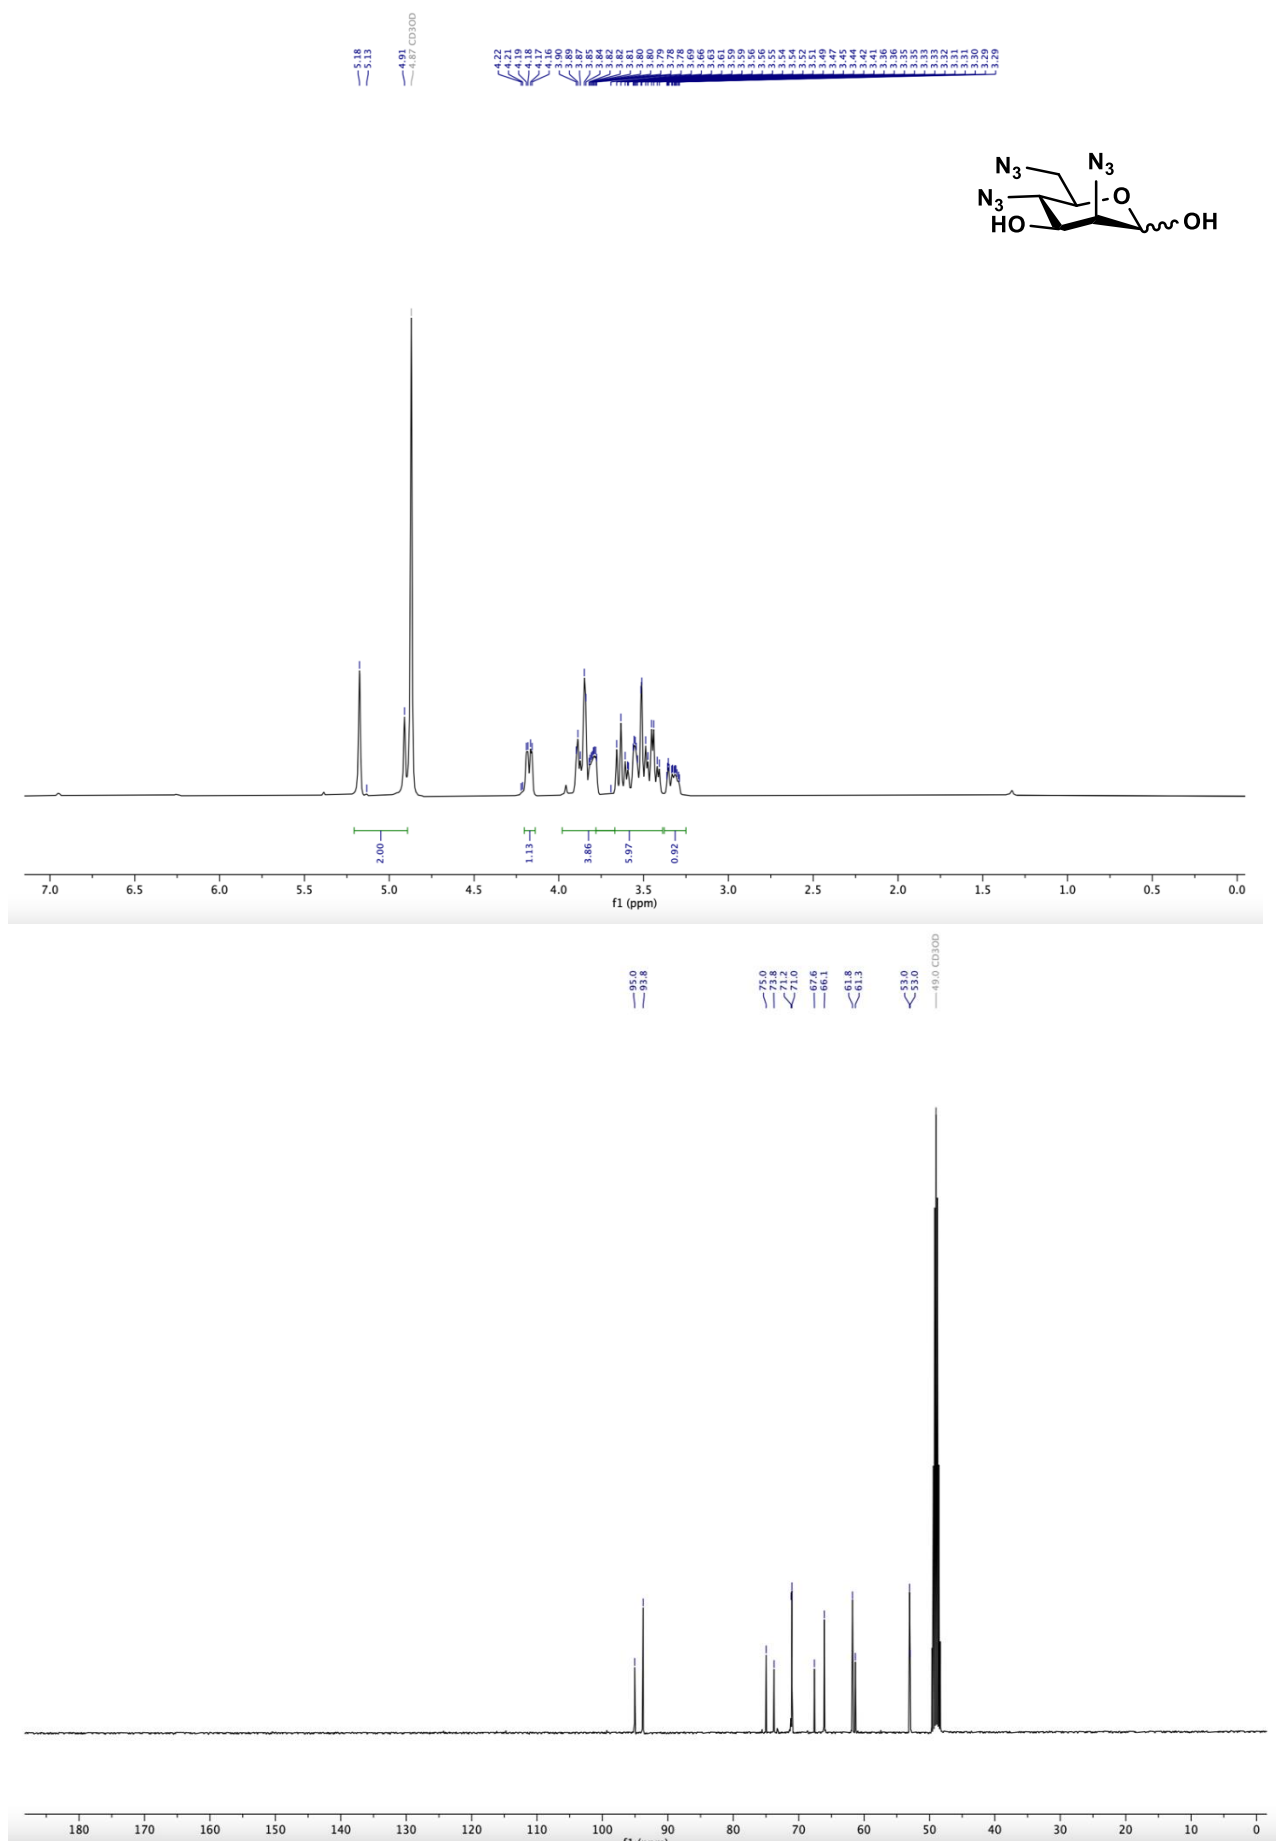

400 MHz  $^1\text{H}$  and 100 MHz  $^{13}\text{C}\{^1\text{H}\}$  NMR spectra of *p*-methoxyphenyl- $\beta$ -D-galactopyranoside (**14**) in  $\text{CD}_3\text{OD}$

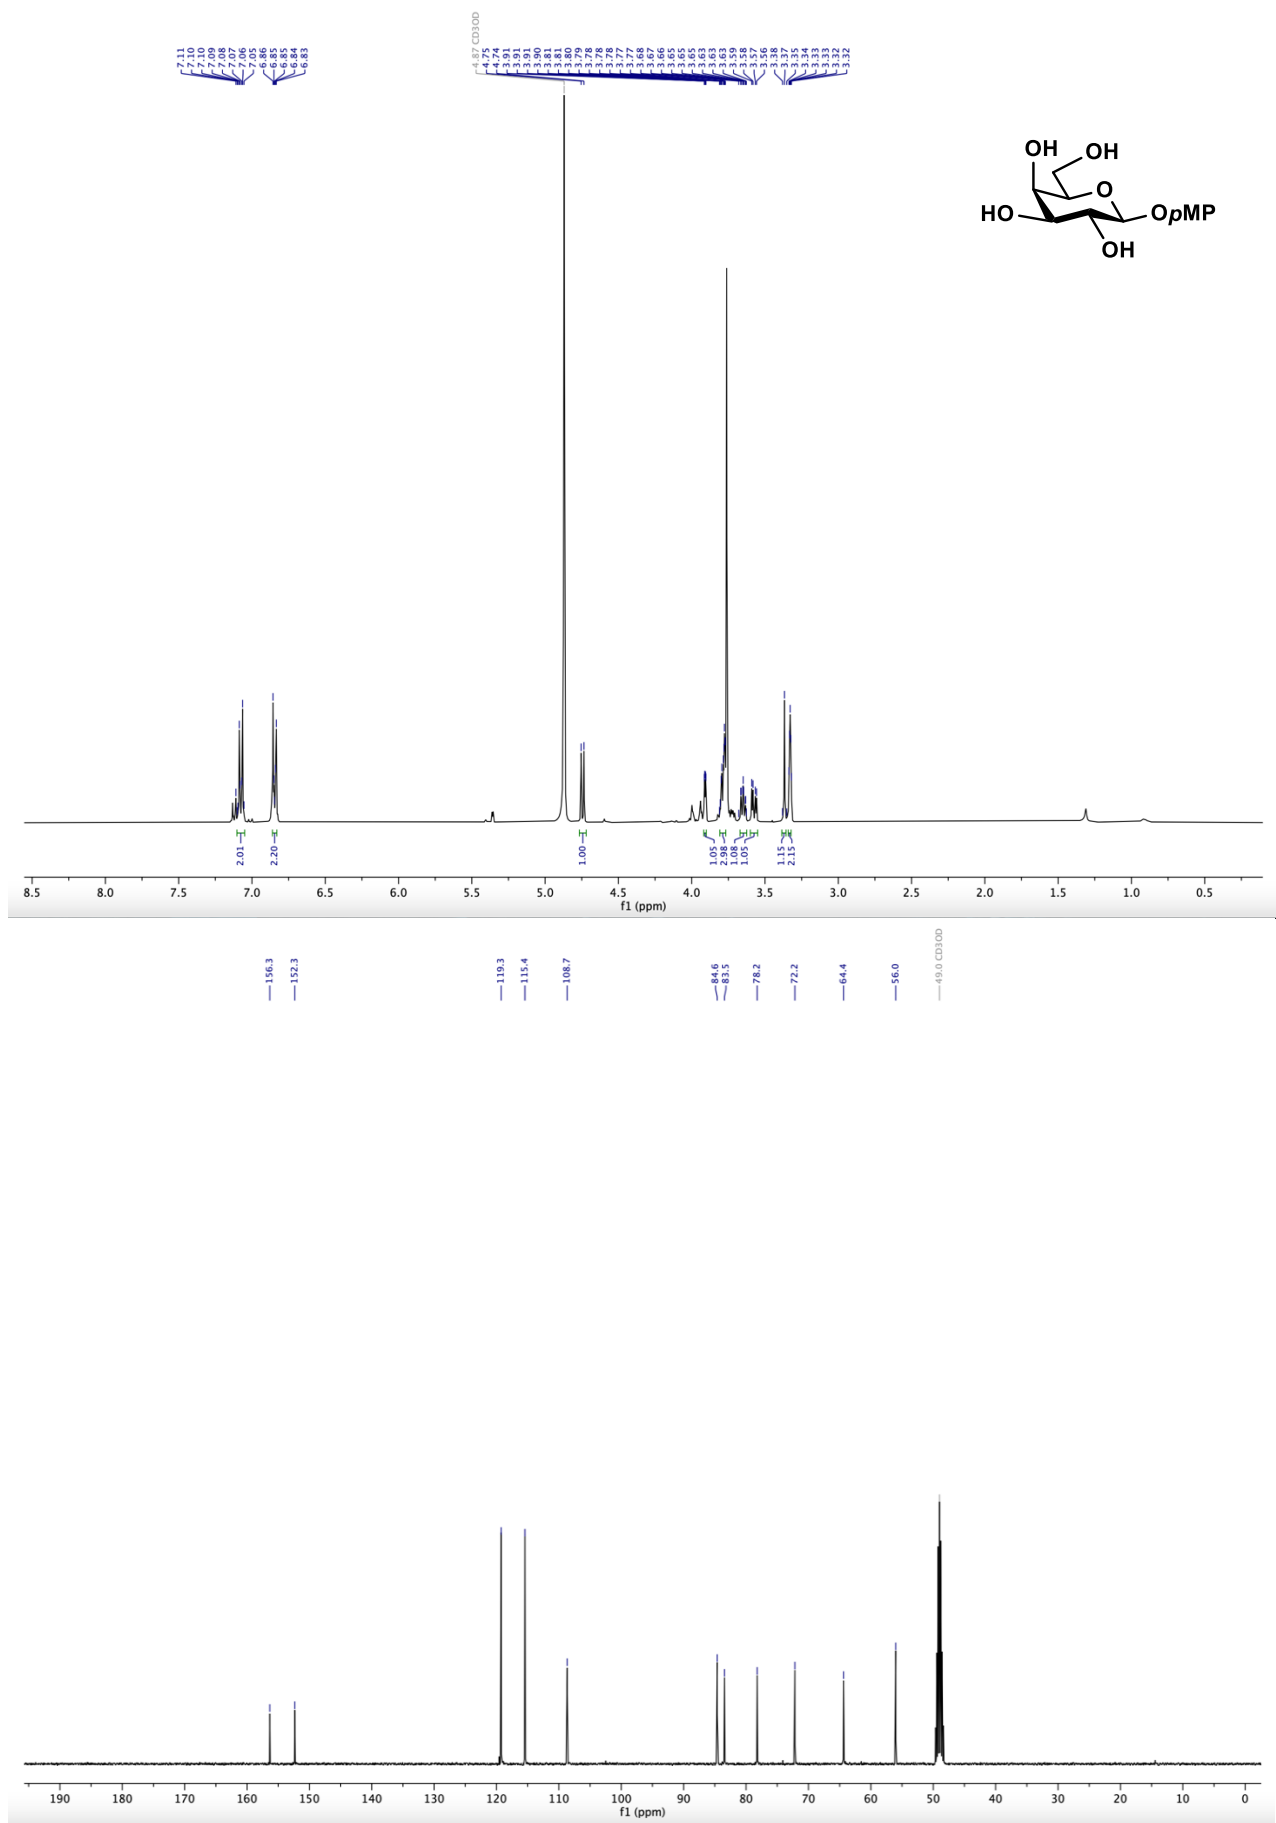

400 MHz  $^1\text{H}$  and 100 MHz  $^{13}\text{C}\{^1\text{H}\}$  NMR spectra of *p*-methoxyphenyl-3,6-dibenzoyl- $\beta$ -D-galactopyranoside (**15**) in  $\text{CD}_3\text{OD}$

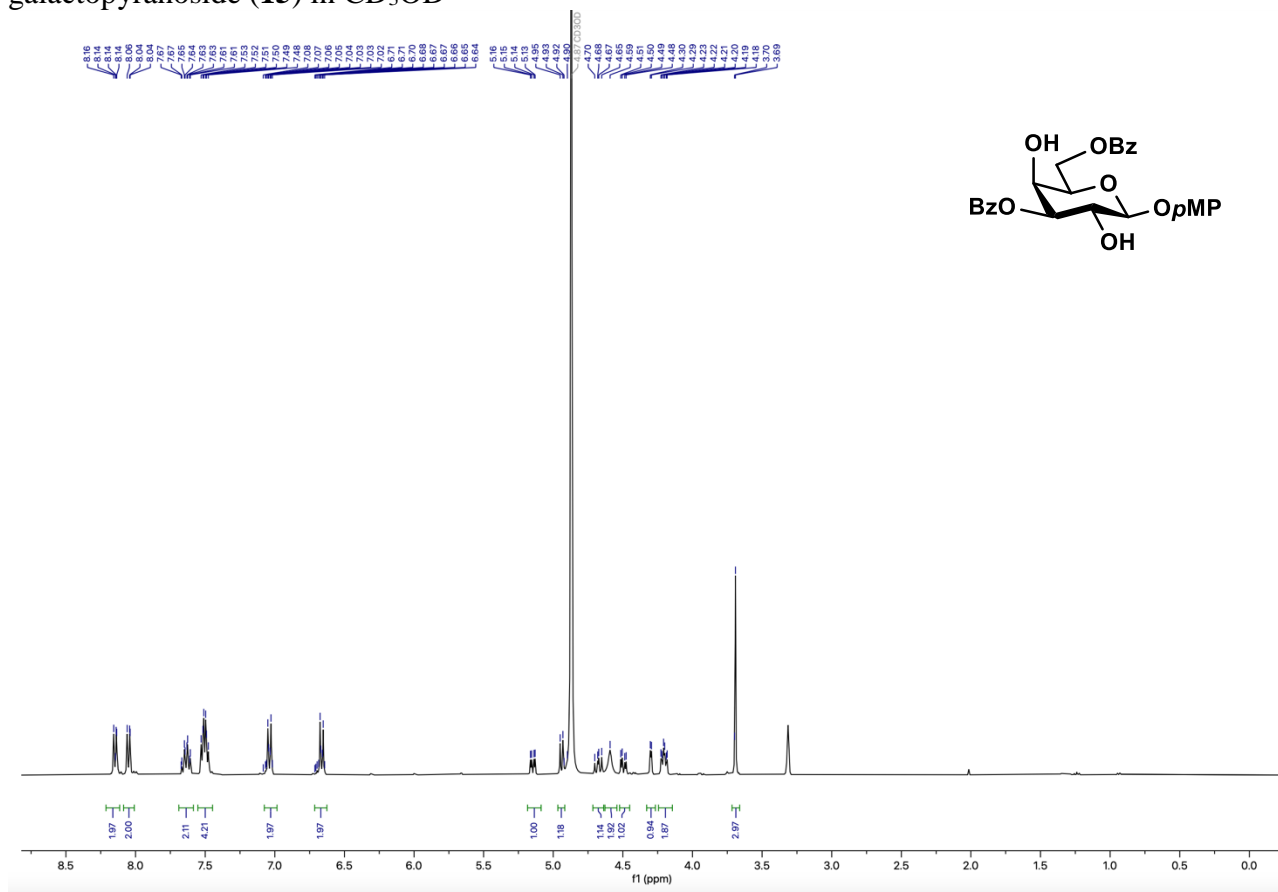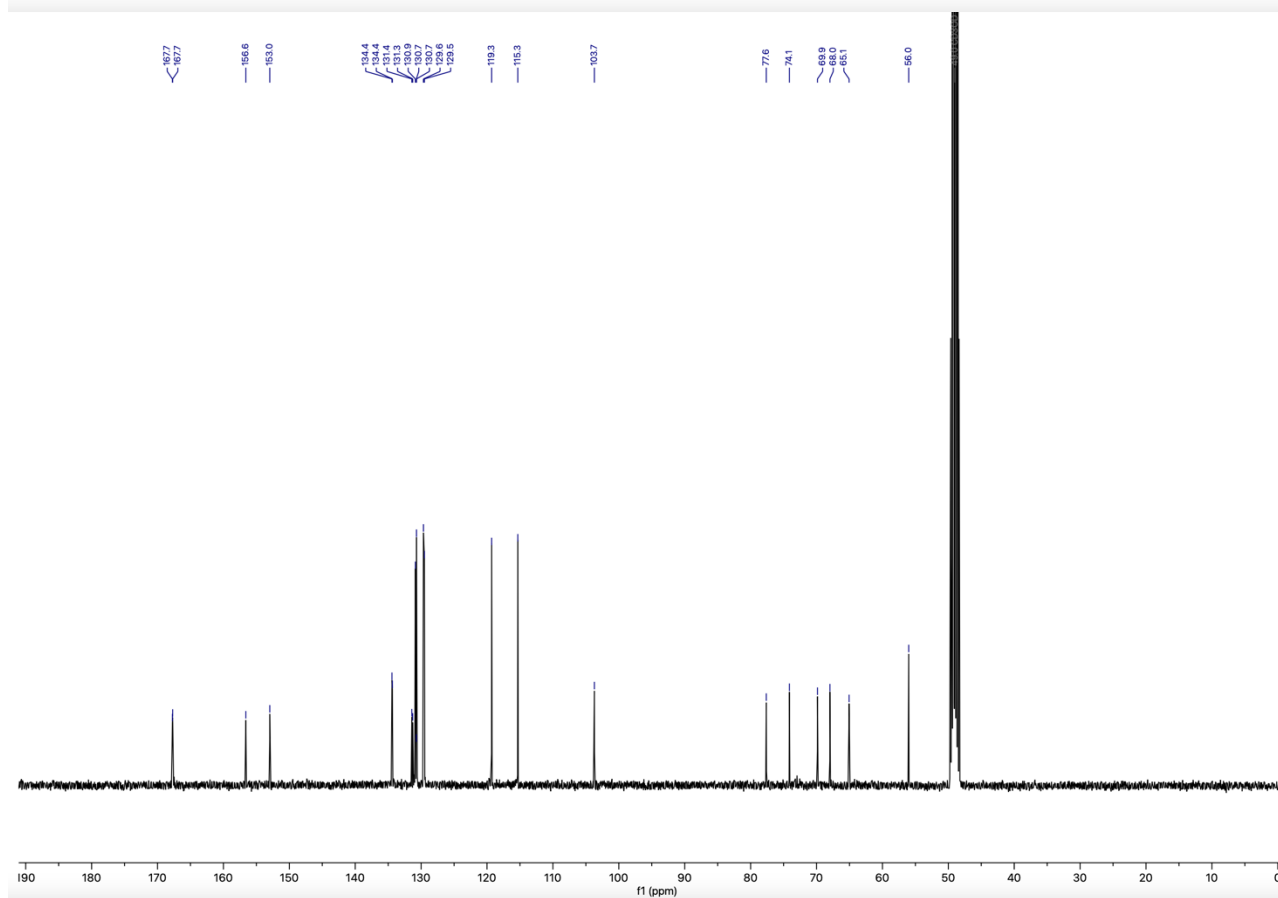

400 MHz  $^1\text{H}$  and 100 MHz  $^{13}\text{C}\{^1\text{H}\}$  NMR spectra of *p*-methoxyphenyl-2,4-di-azido-3,6-dibenzoyl-2,4-dideoxy- $\beta$ -D-mannopyranoside (**16**) in  $\text{CDCl}_3$

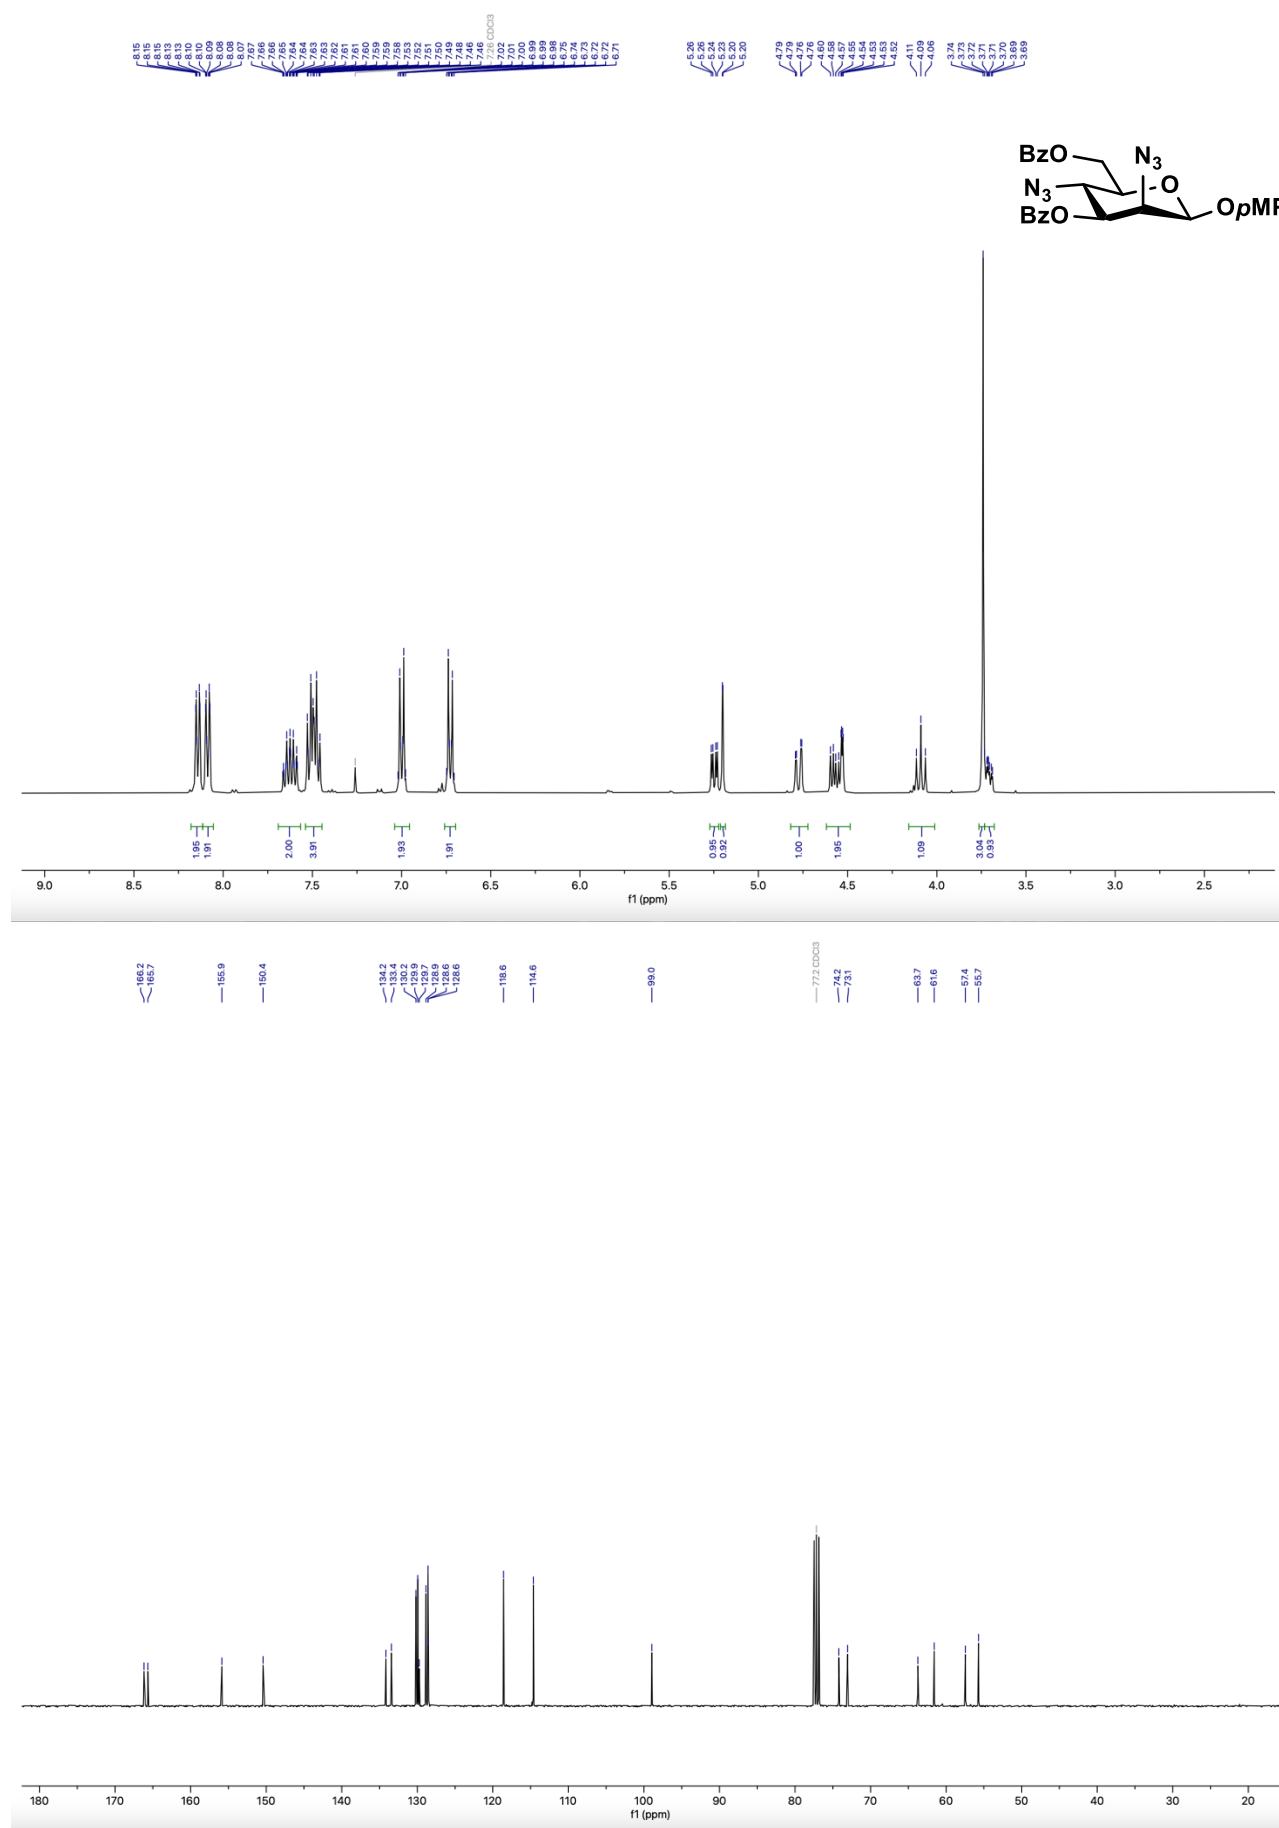



800 MHz  $^1\text{H}$  and 200 MHz  $^{13}\text{C}\{^1\text{H}\}$  NMR spectra of *p*-methoxyphenyl-2,4-diacetamido-2,4-dideoxy- $\beta$ -D-mannopyranoside (**18**) in  $\text{CD}_3\text{OD}$

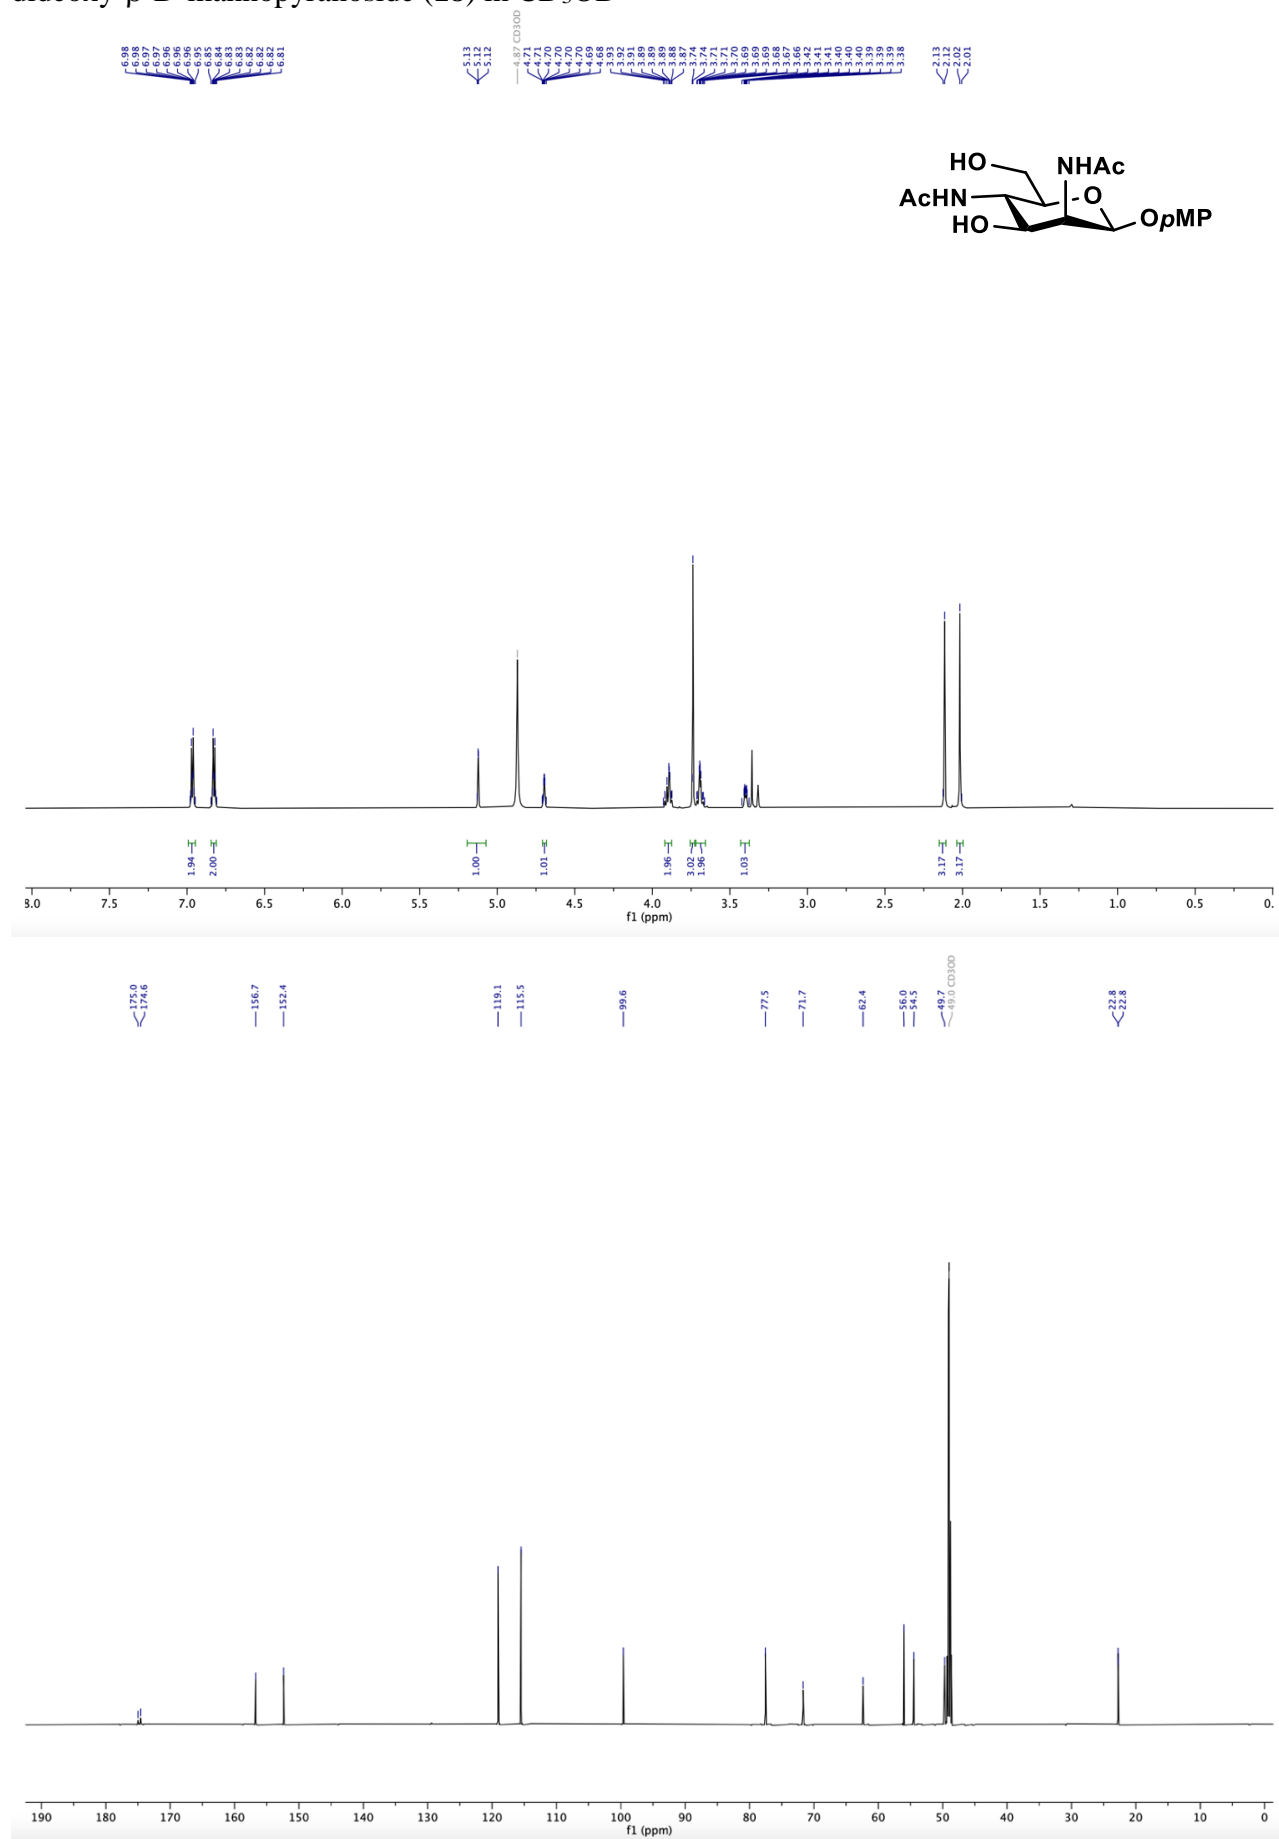

800 MHz  $^1\text{H}$  and 200 MHz  $^{13}\text{C}\{^1\text{H}\}$  NMR spectra of *p*-methoxyphenyl-2,4-di-azido-2,4-dideoxy- $\beta$ -D-mannopyranoside (**19**) in  $\text{CDCl}_3$

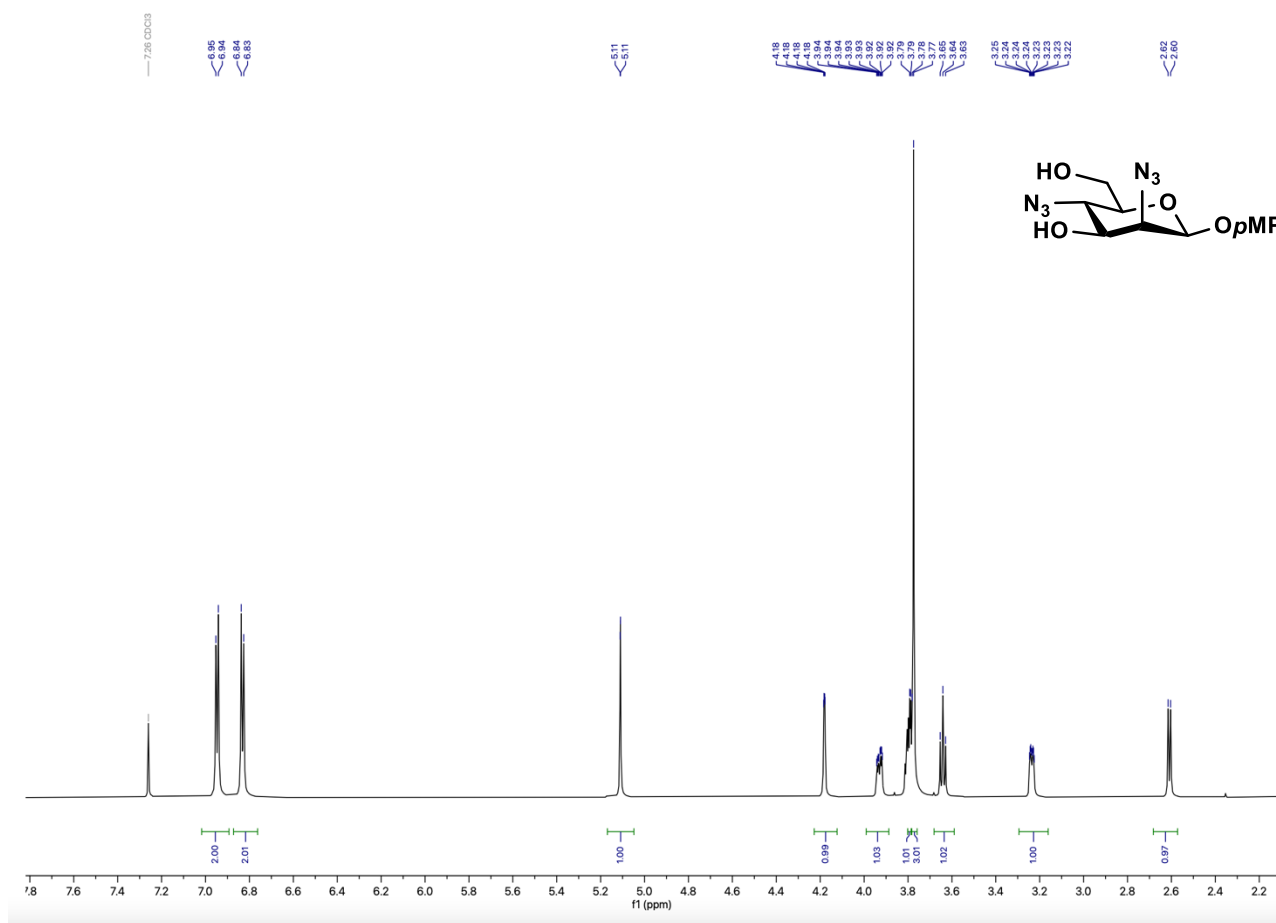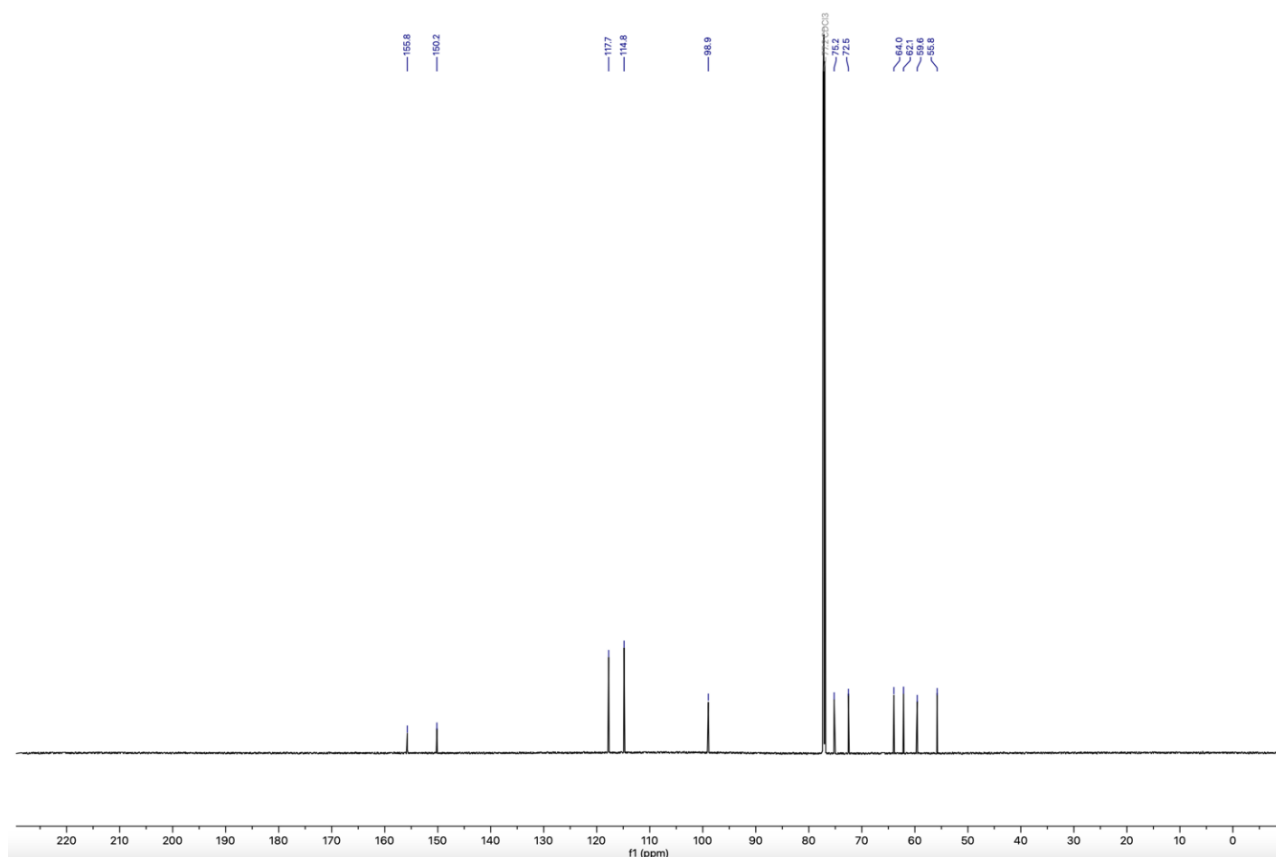



400 MHz  $^1\text{H}$  and 200 MHz  $^{13}\text{C}\{^1\text{H}\}$  NMR spectra of *p*-methoxyphenyl-3-benzoyl- $\beta$ -D-galactopyranoside (**20**) in  $\text{CD}_3\text{OD}$

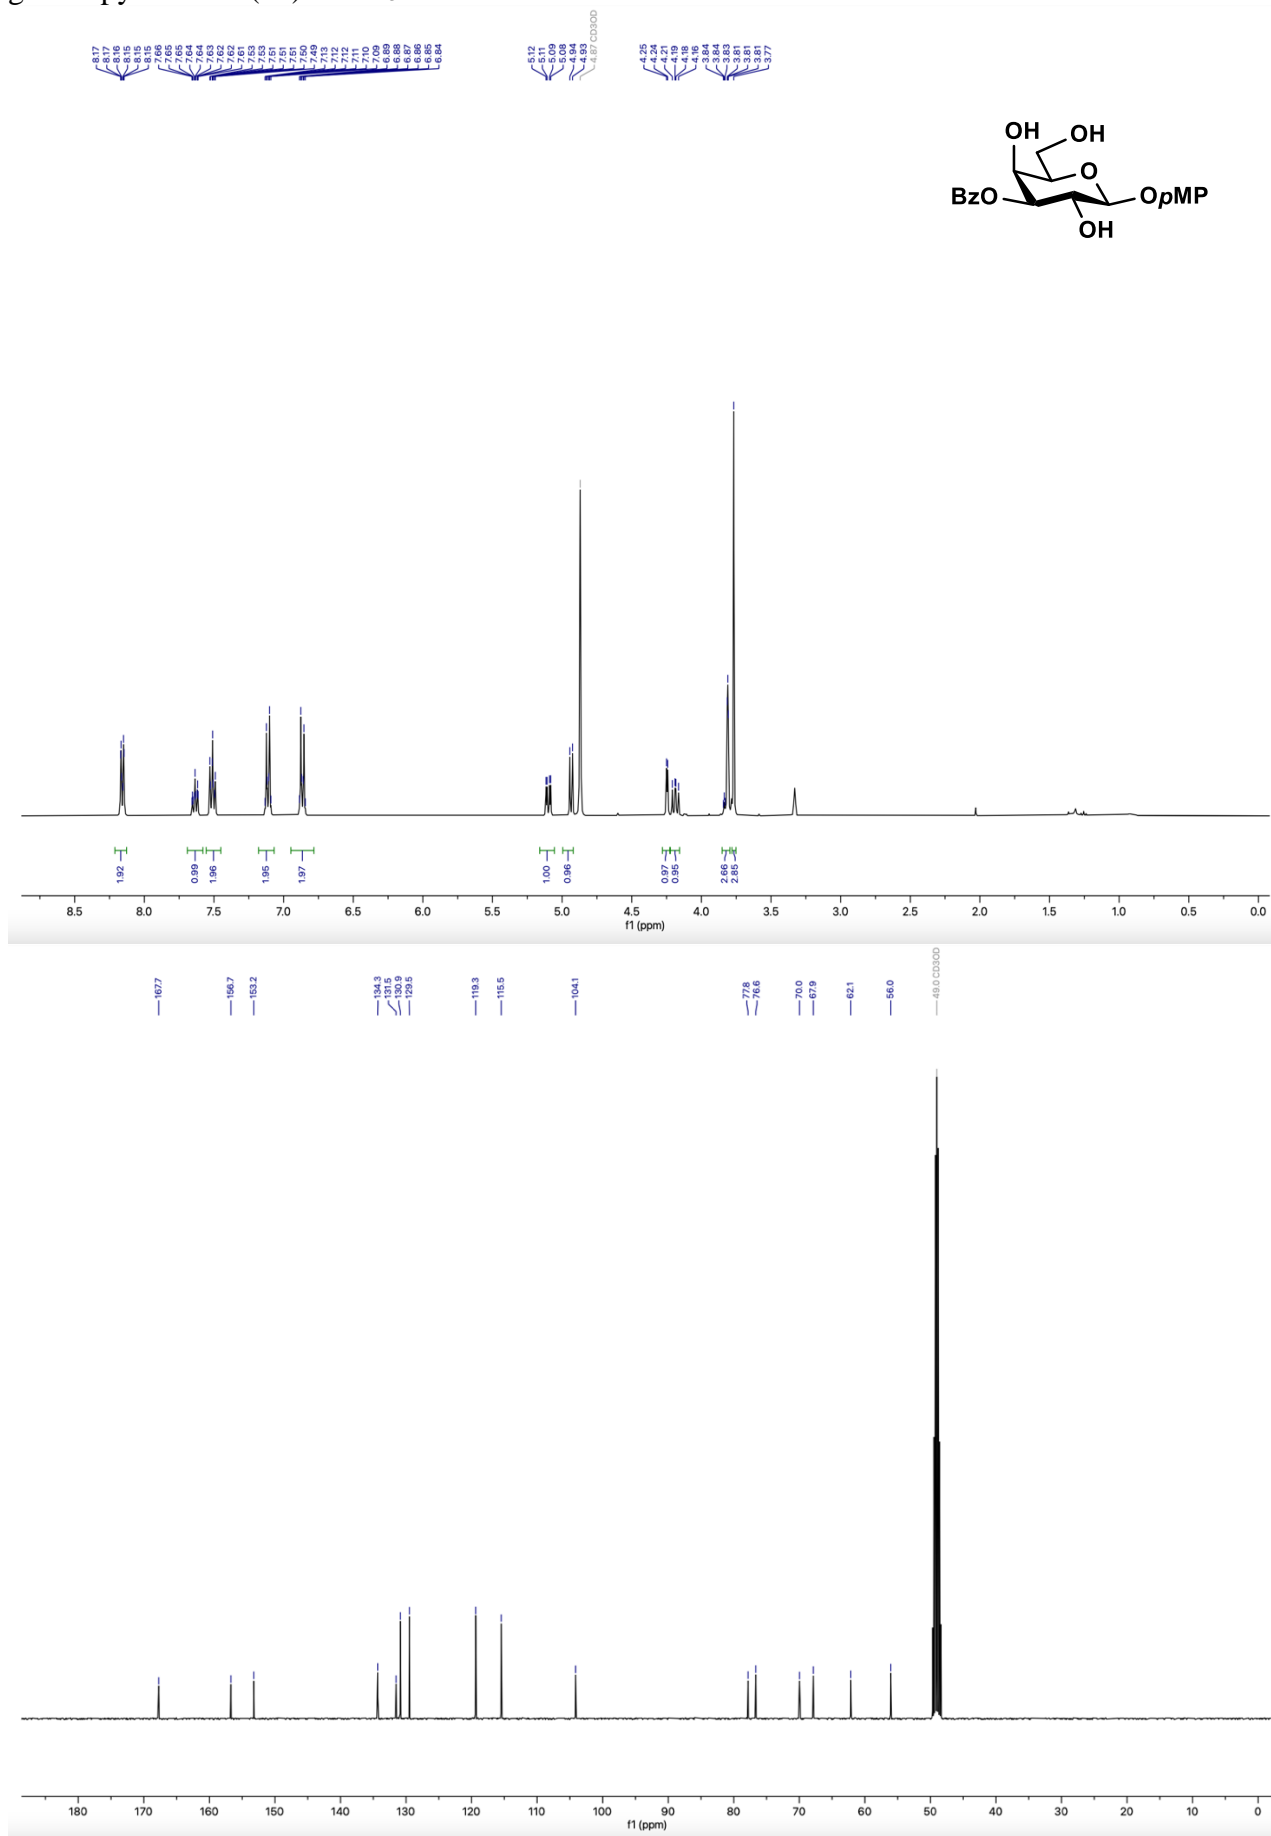

400 MHz  $^1\text{H}$  and 100 MHz  $^{13}\text{C}\{^1\text{H}\}$  NMR spectra of *p*-methoxyphenyl-2,4,6-triazido-3-benzoyl-2,4,6-trideoxy- $\beta$ -D-mannopyranoside (**21**) in  $\text{CDCl}_3$

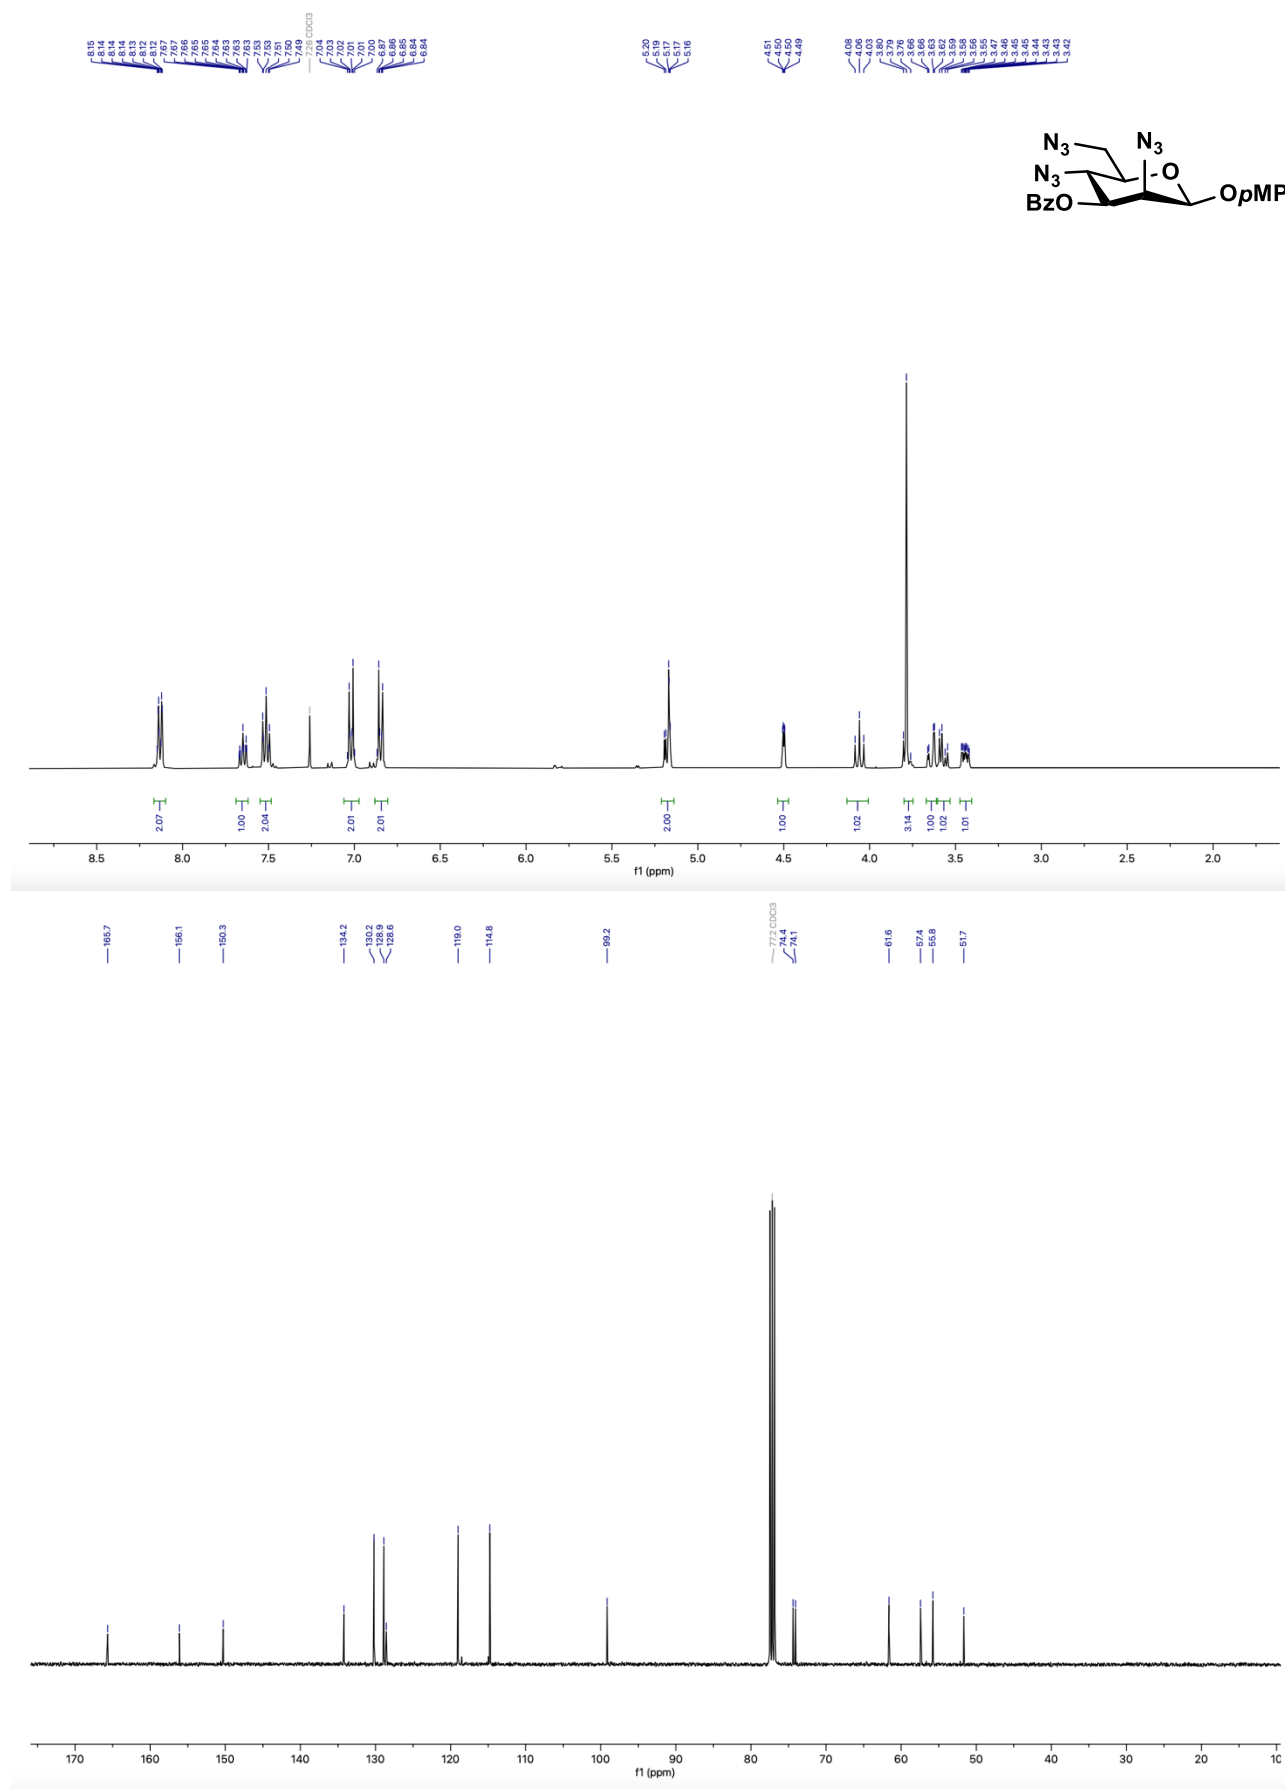

800 MHz  $^1\text{H}$  and 200 MHz  $^{13}\text{C}\{^1\text{H}\}$  NMR spectra of *p*-methoxy phenyl-2,4,6-triacetamido-3-benzoyl-2,4,6-trideoxy- $\beta$ -D-mannopyranoside (**22**) in  $\text{CD}_3\text{OD}$

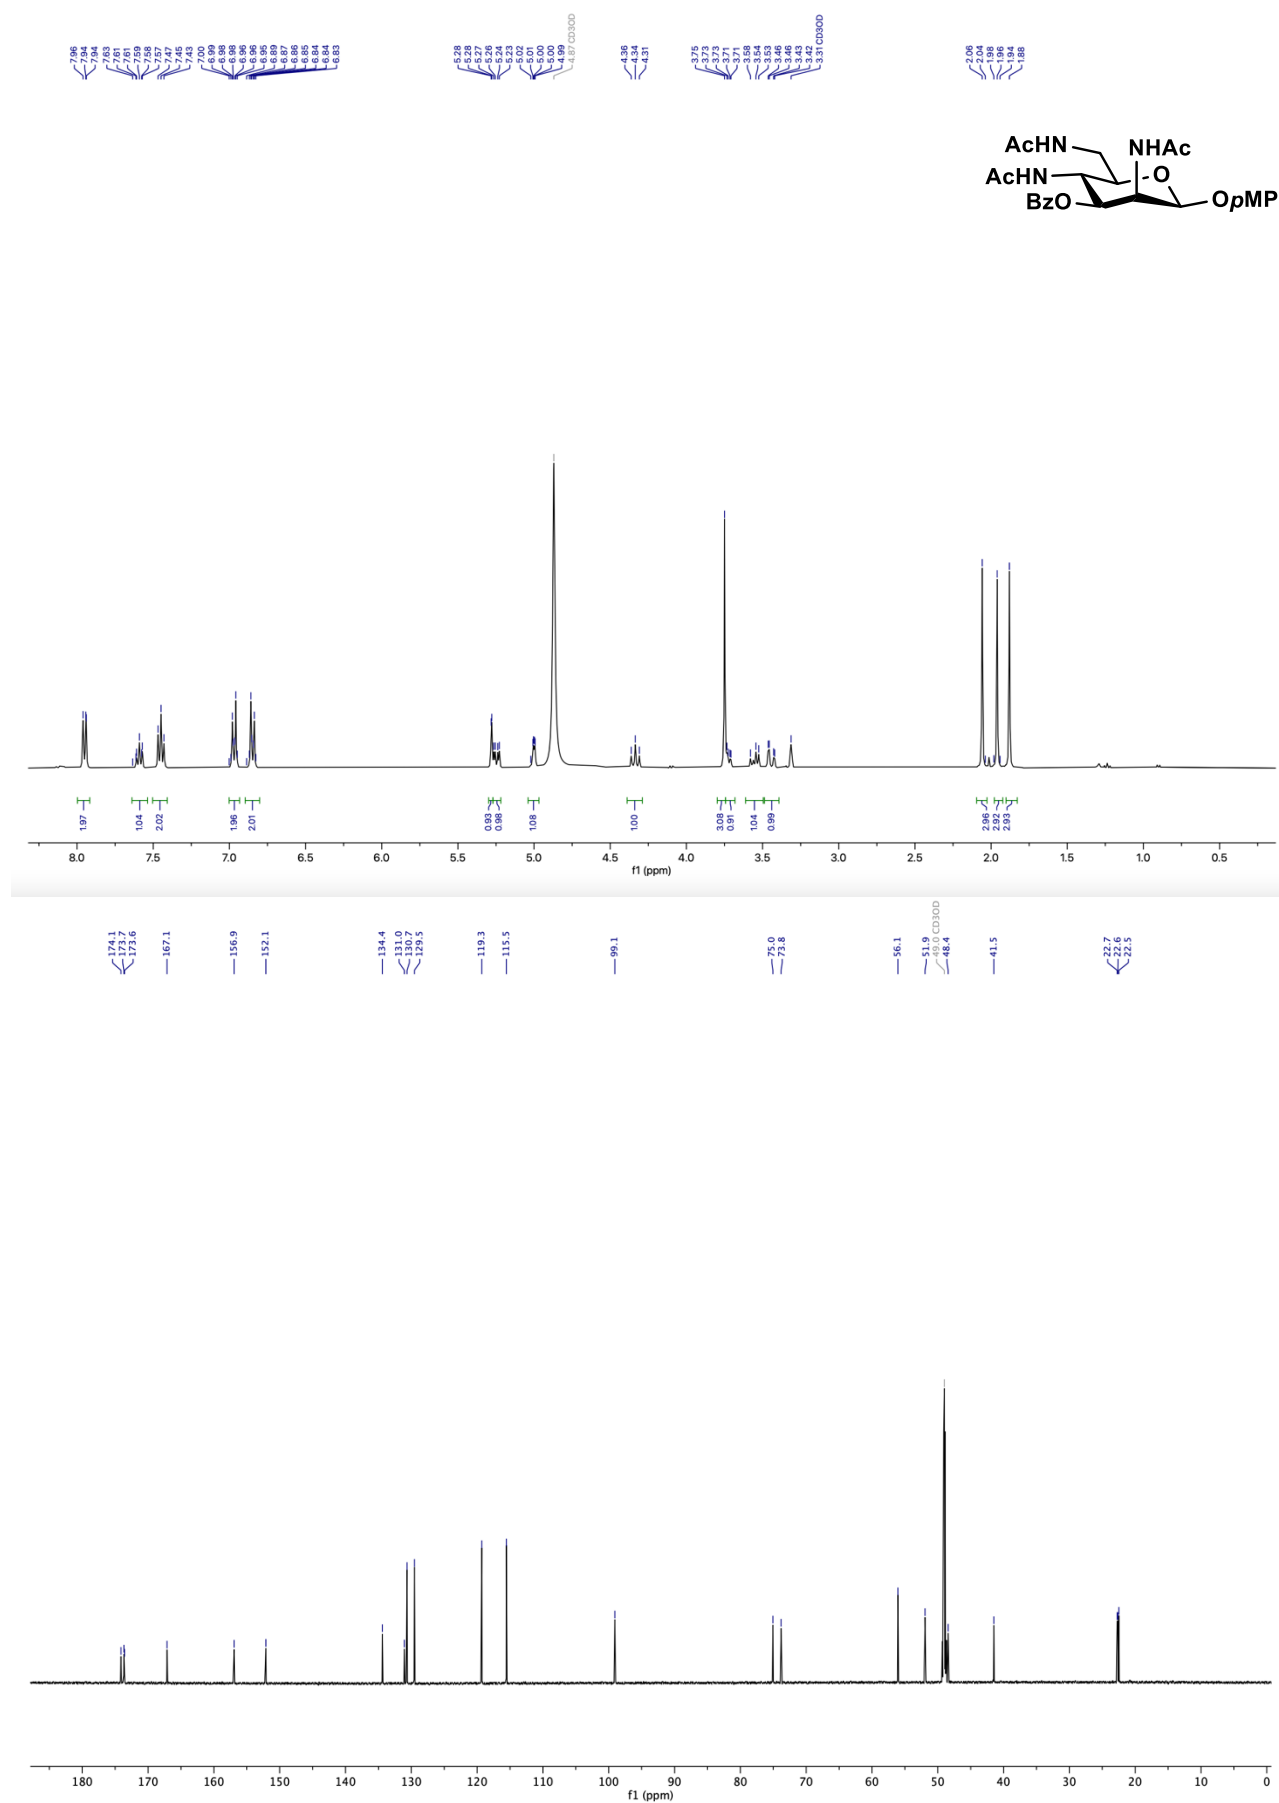

400 MHz  $^1\text{H}$  and 100 MHz  $^{13}\text{C}\{^1\text{H}\}$  NMR spectra of *p*-methoxyphenyl-2,4,6-triazido-2,4,6-trideoxy- $\beta$ -D-mannopyranoside (**23**) in  $\text{CDCl}_3$

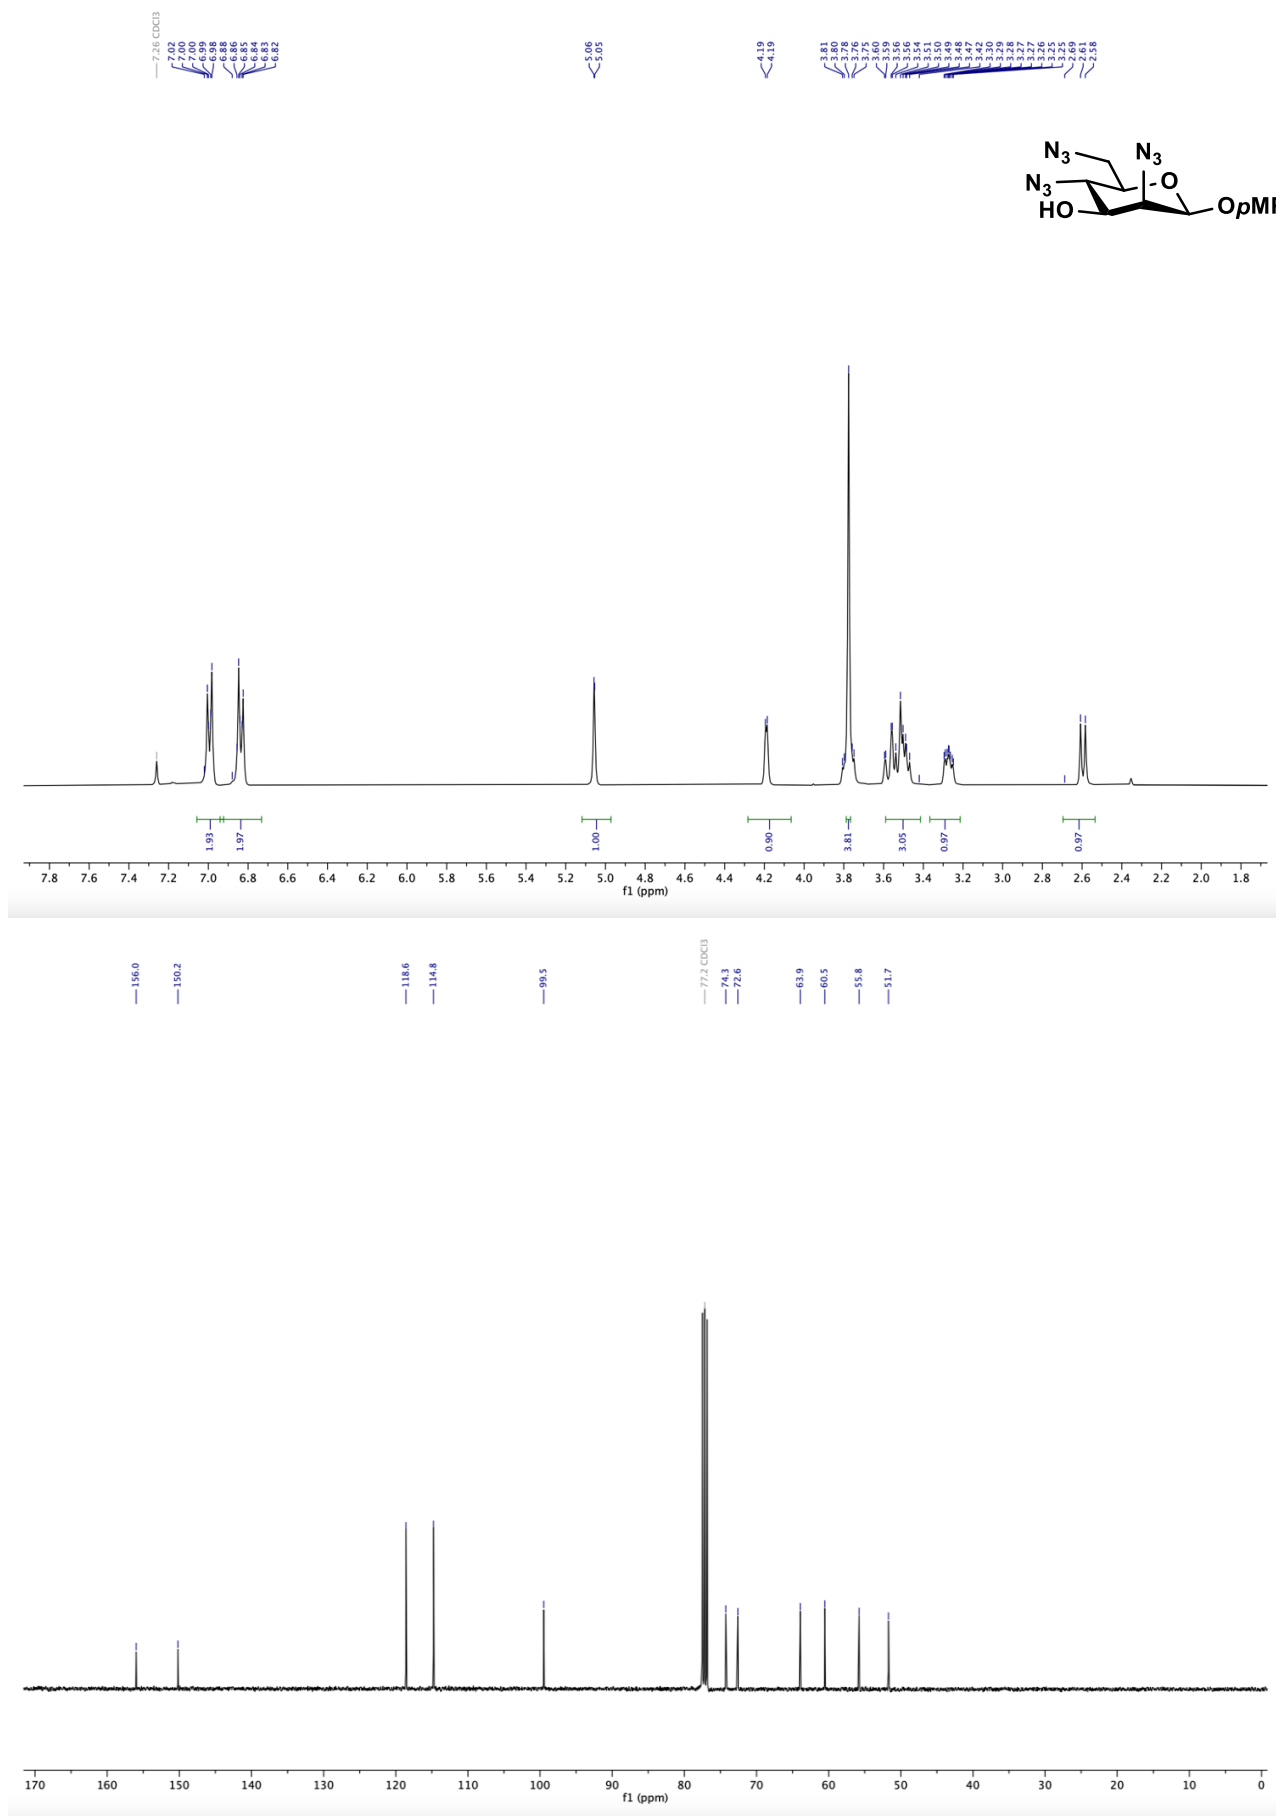

400 MHz  $^1\text{H}$  and 100 MHz  $^{13}\text{C}\{^1\text{H}\}$  NMR spectra of LacNAc $\beta$ ProNHCbz (**25**) in  $\text{D}_2\text{O}$

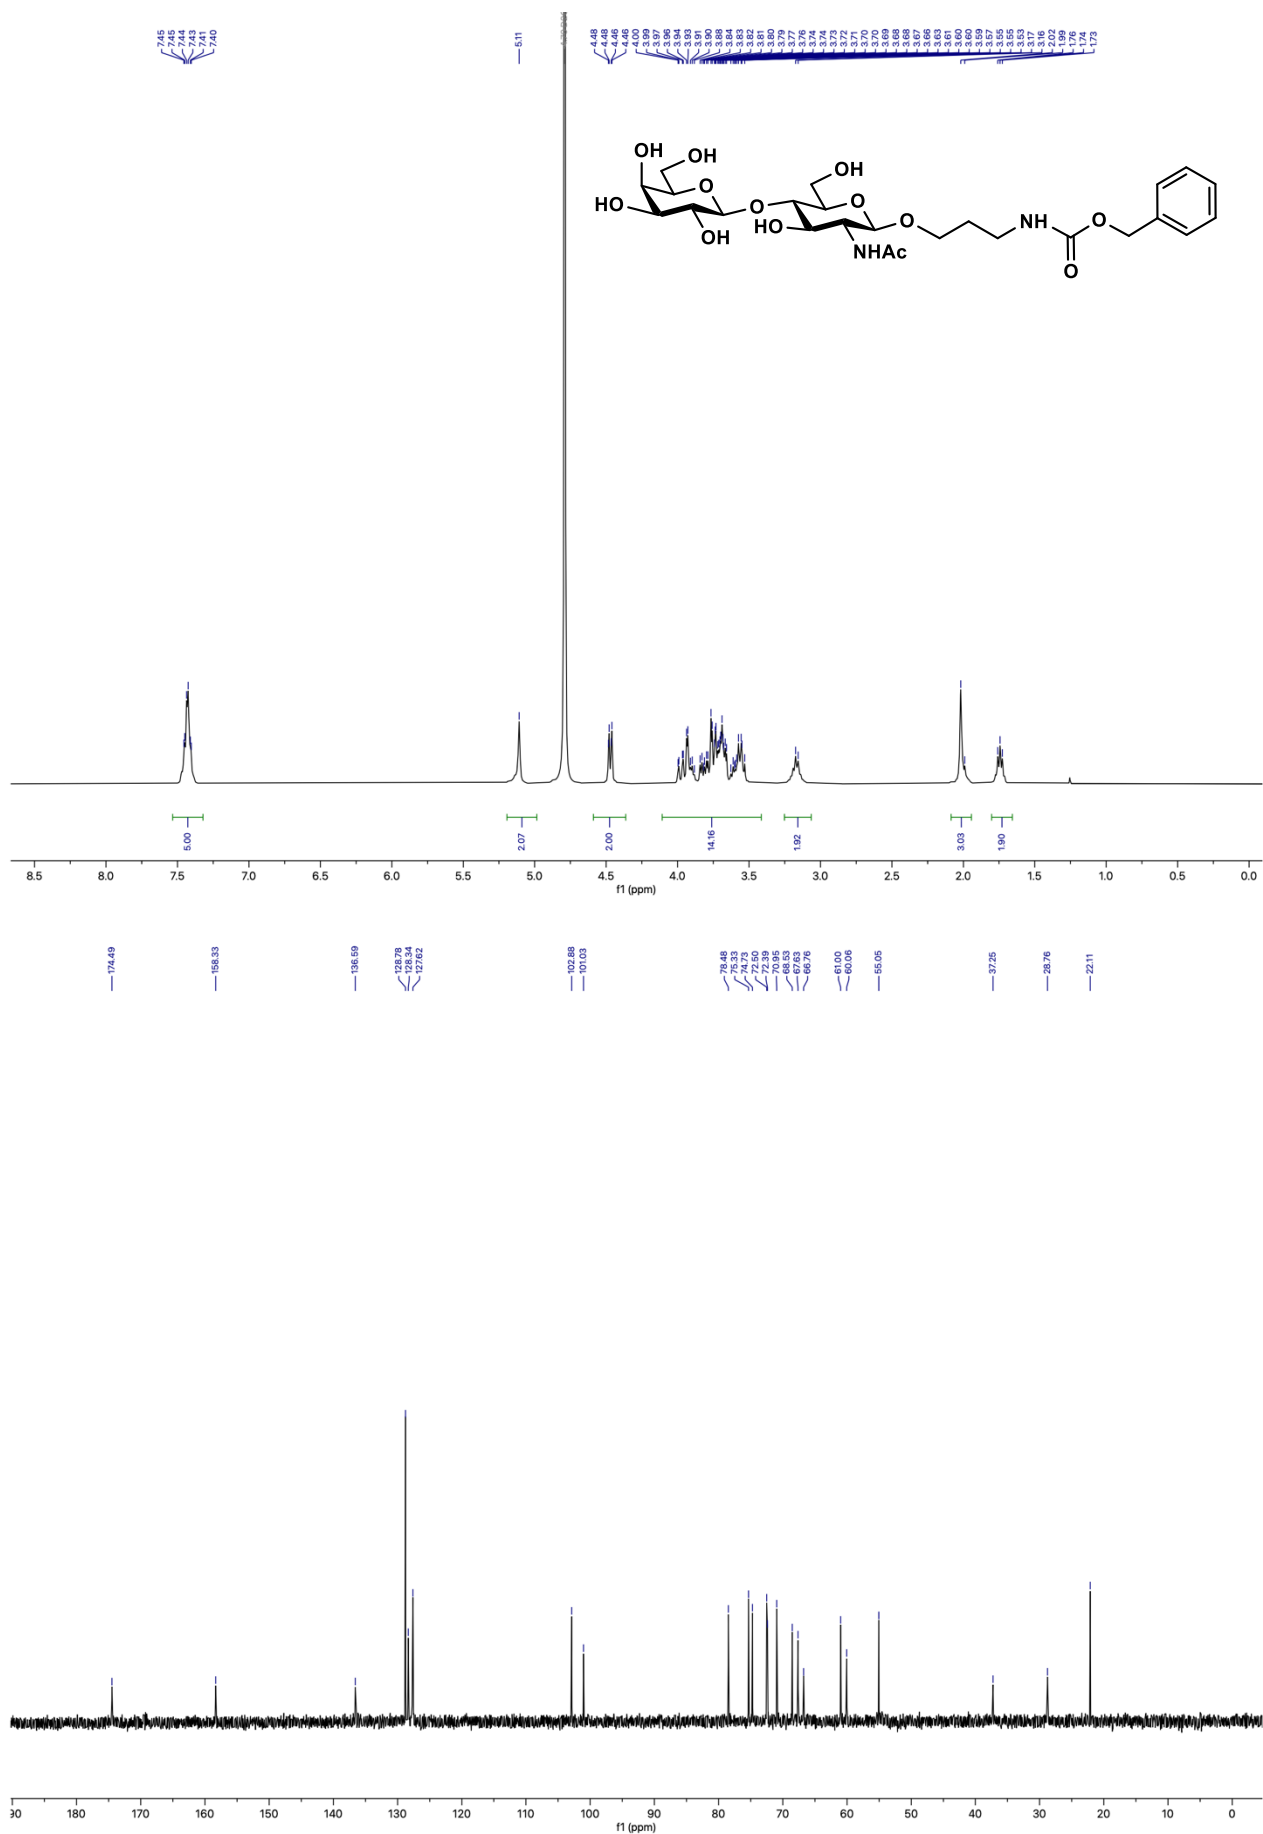

800 MHz  $^1\text{H}$  and 200 MHz  $^{13}\text{C}\{^1\text{H}\}$  NMR spectra of Gal $\beta$ 1-3GalNAc $\beta$ ProNHCbz (**26**) in  $\text{D}_2\text{O}$

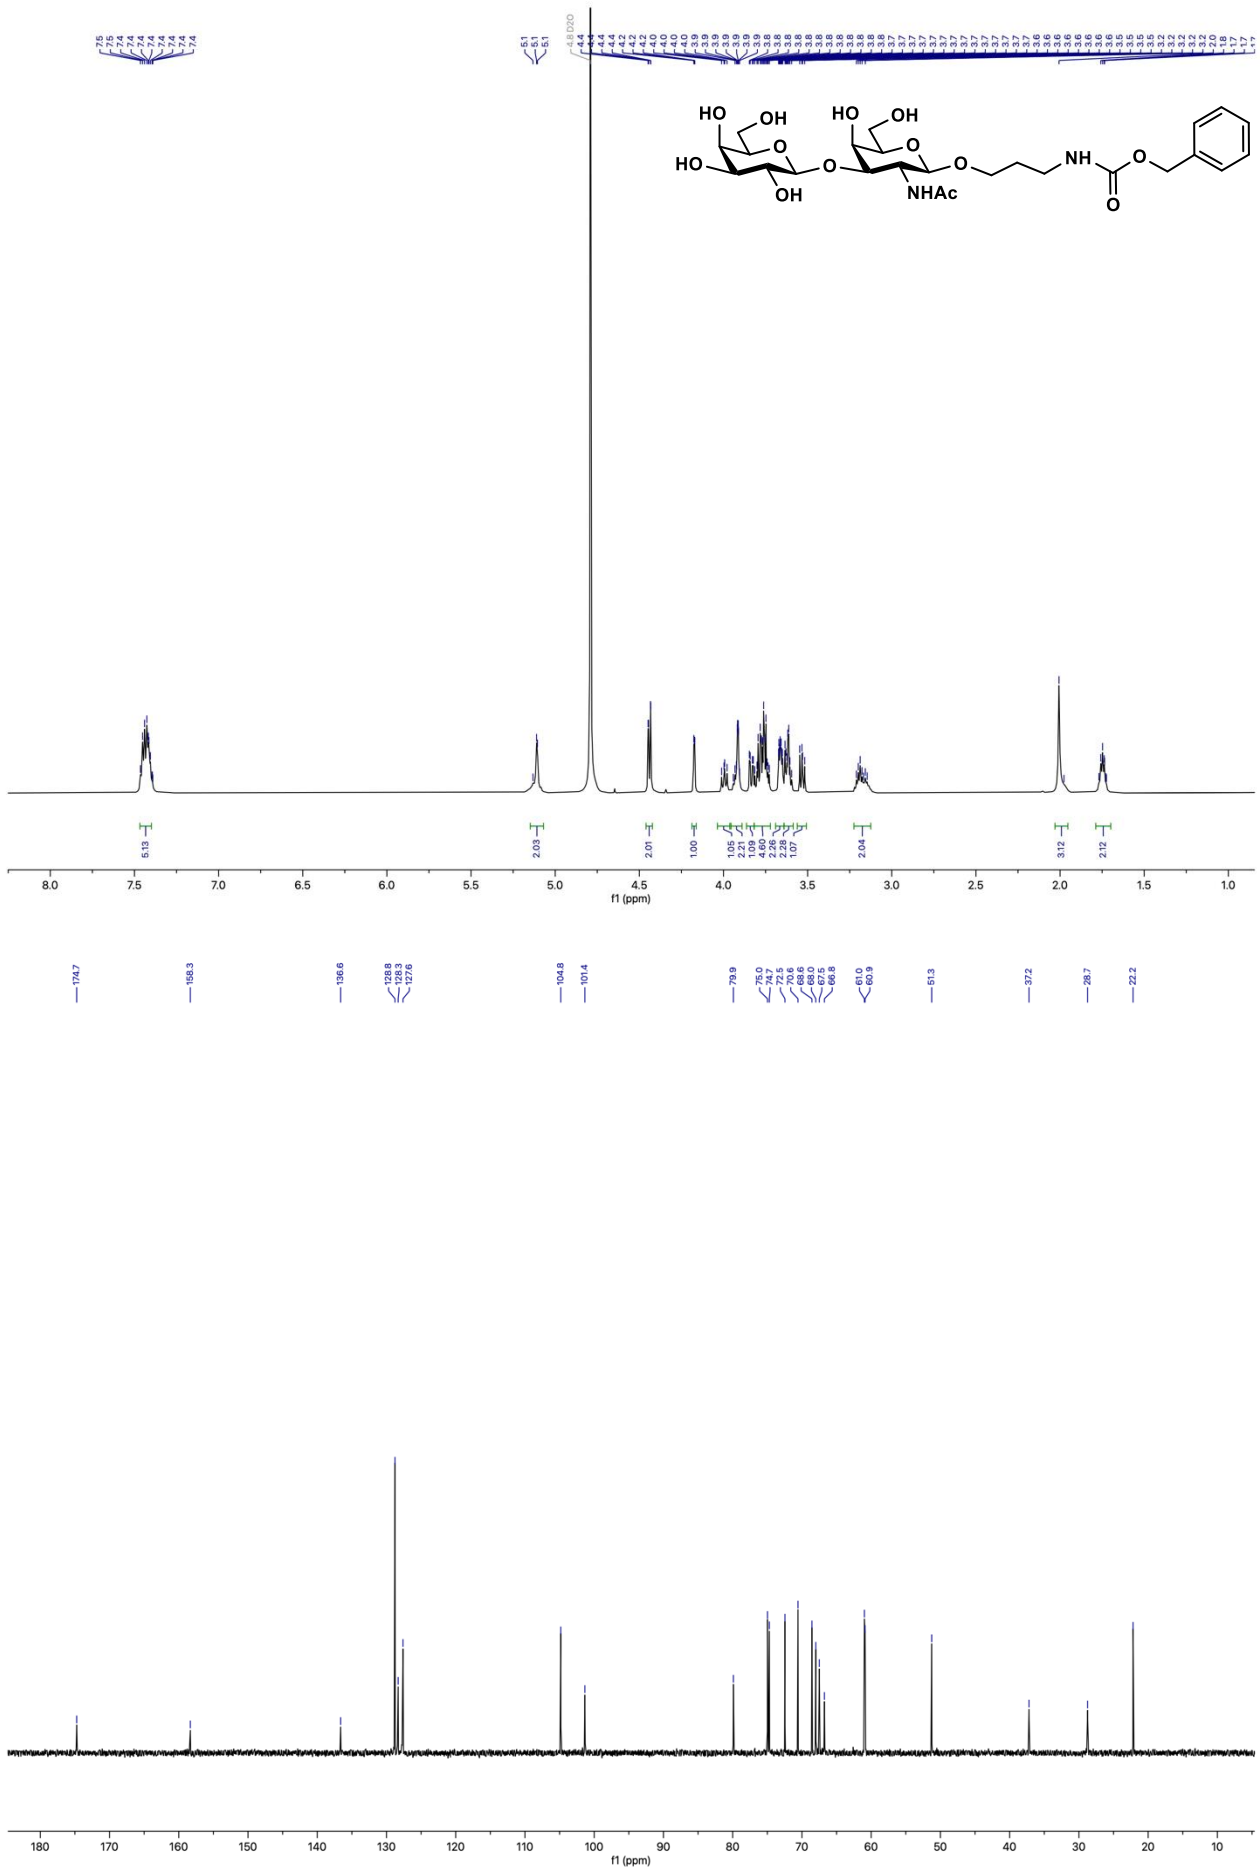

400 MHz  $^1\text{H}$  and 100 MHz  $^{13}\text{C}\{^1\text{H}\}$  NMR spectra of Gal $\beta$ 1-3GalNAc $\alpha$ ProNHCbz (**27**) in  $\text{D}_2\text{O}$

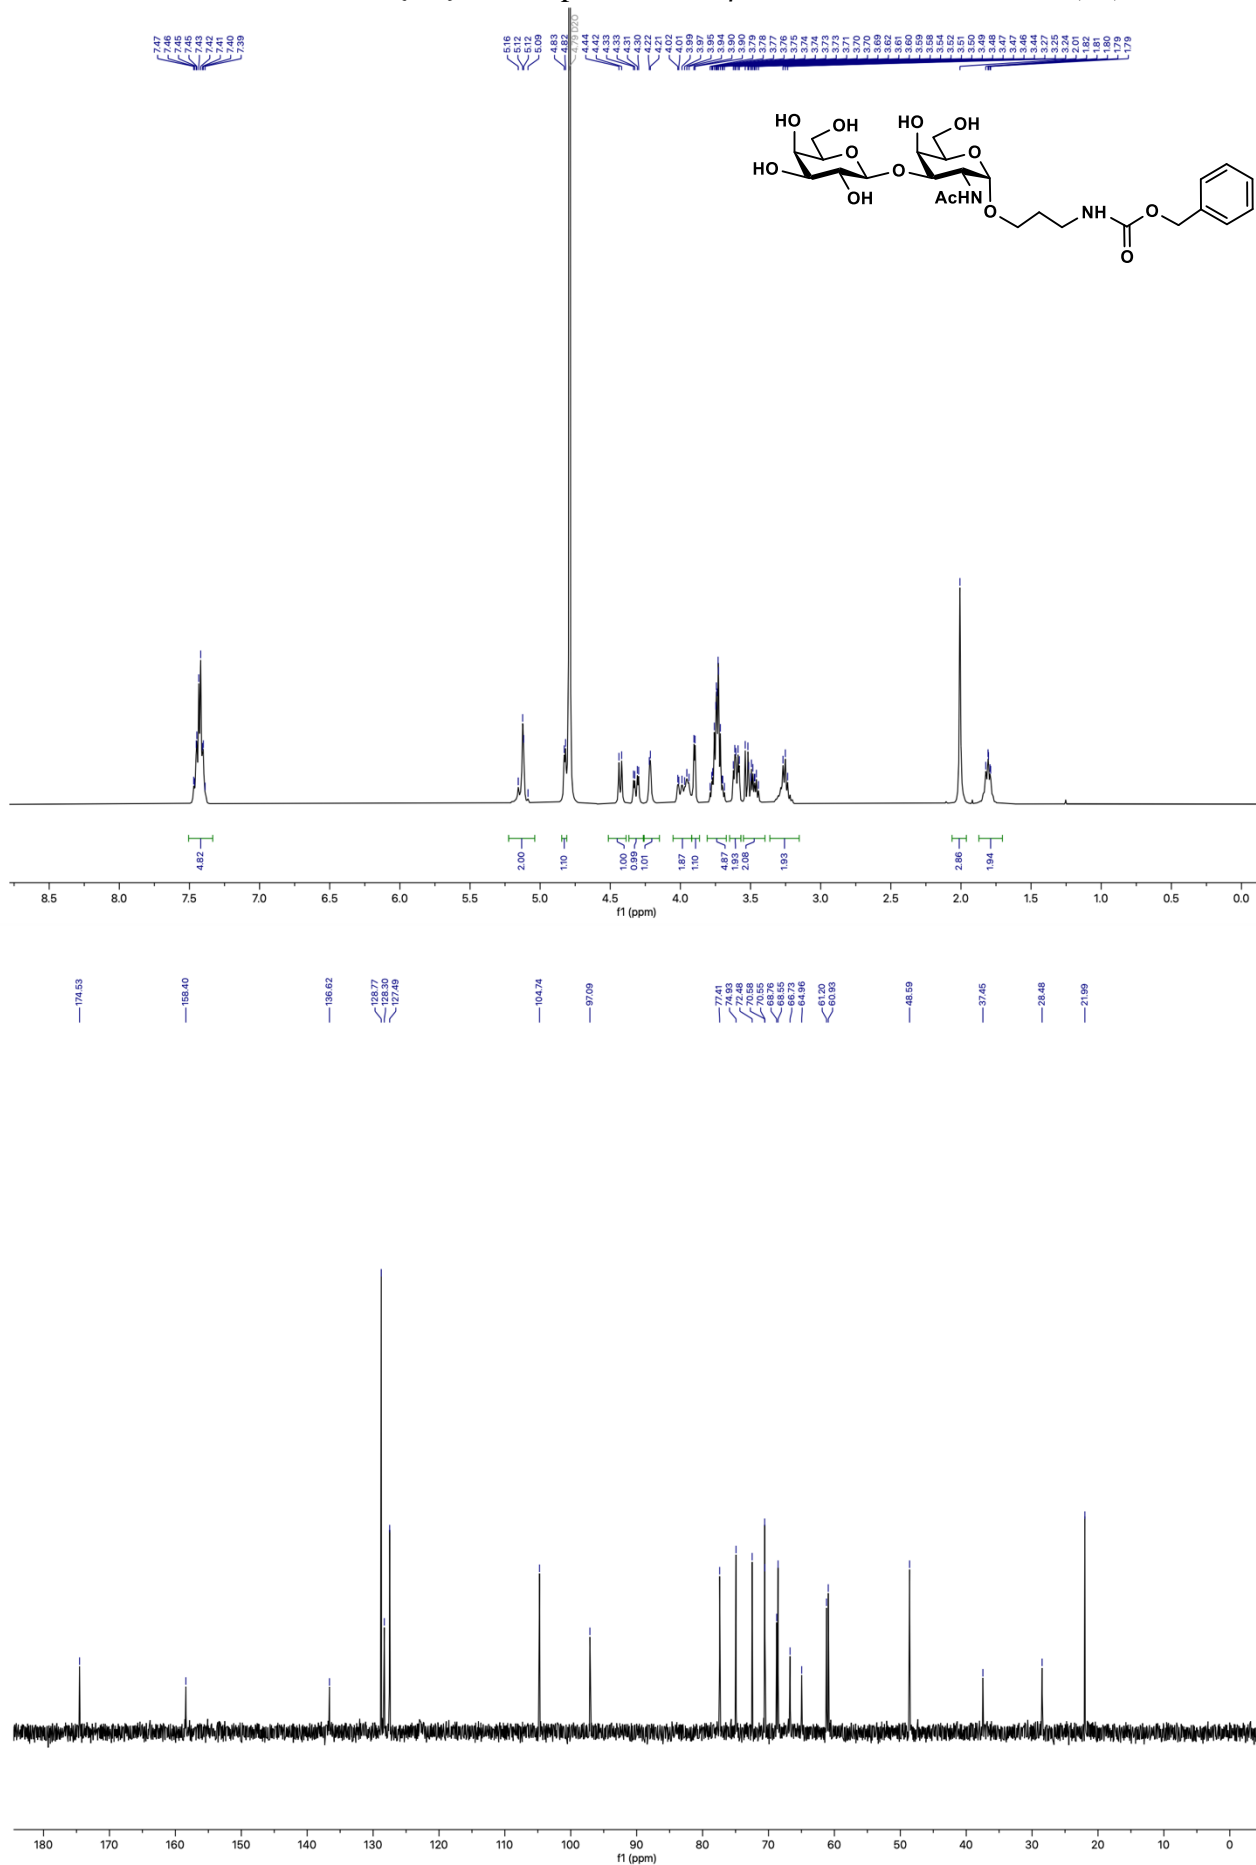

400 MHz  $^1\text{H}$  and 100 MHz  $^{13}\text{C}\{^1\text{H}\}$  NMR spectra of Gal $\beta$ 1-3GlcNAc $\beta$ ProNHCBz (**28**) in  $\text{D}_2\text{O}$

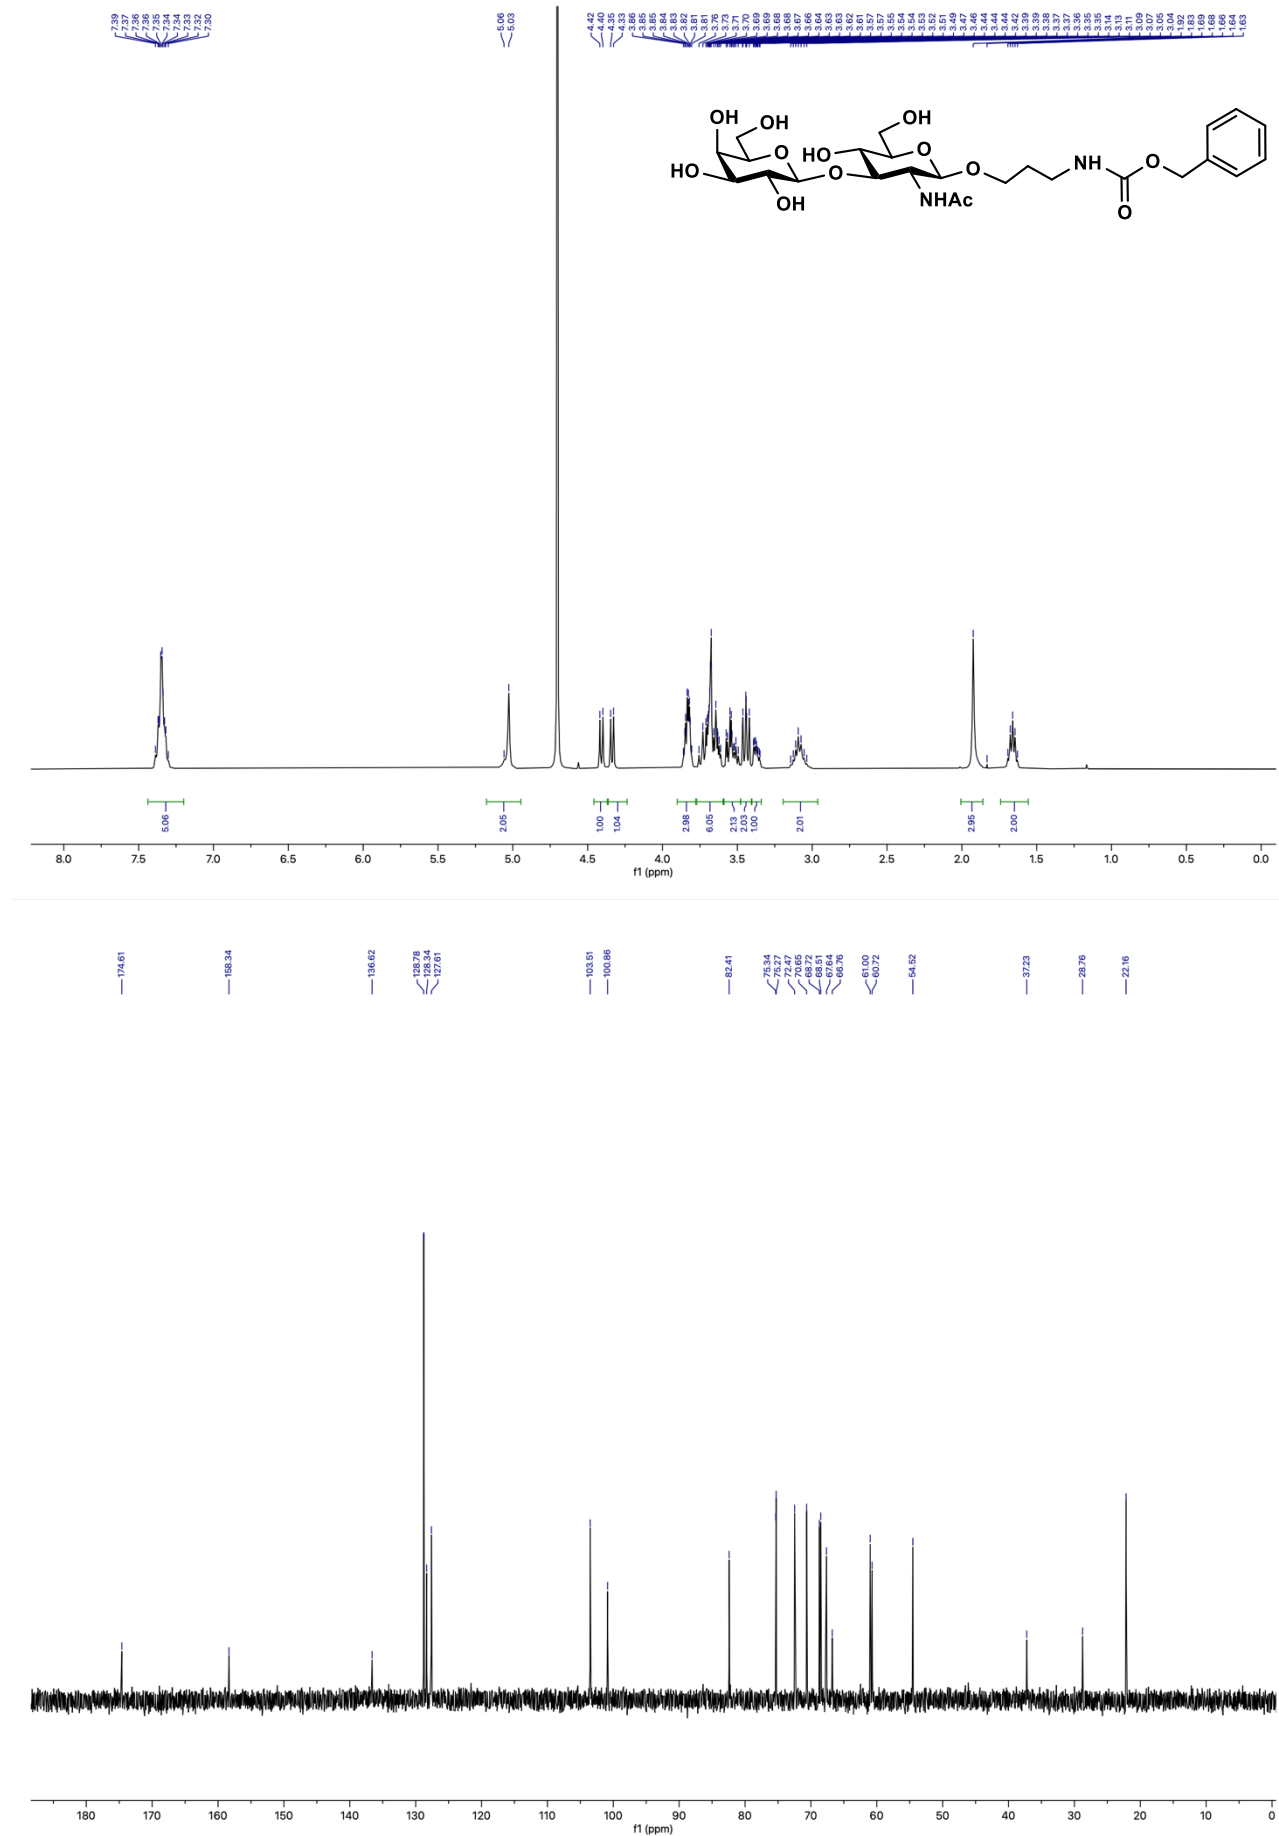



400 MHz  $^1\text{H}$  and 100 MHz  $^{13}\text{C}\{^1\text{H}\}$  NMR spectra of Gal $\beta$ 1-3GlcNAc $\alpha$ ProNHCbz (**29**) in  $\text{D}_2\text{O}$

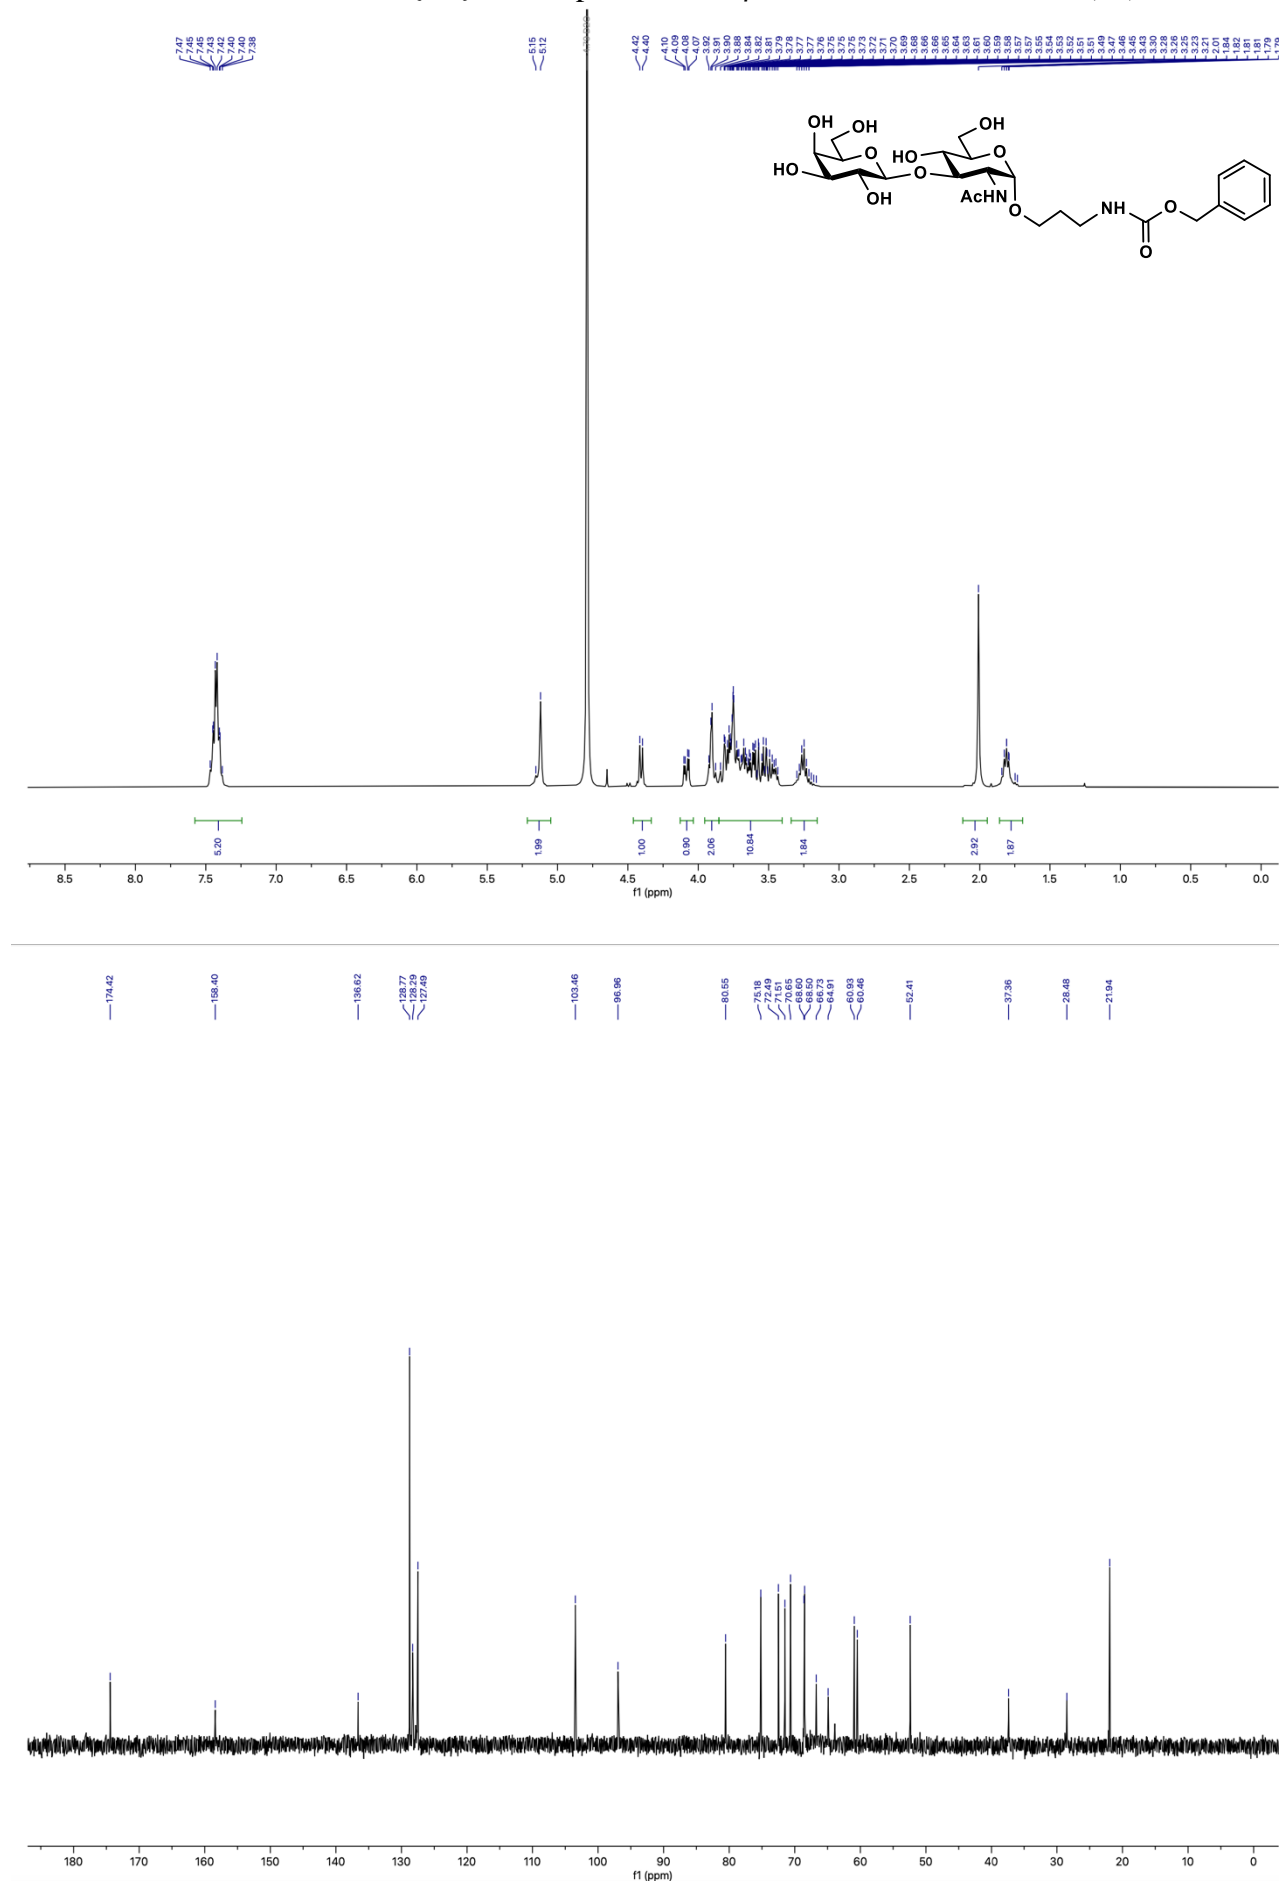

400 MHz  $^1\text{H}$  and 100 MHz  $^{13}\text{C}\{^1\text{H}\}$  NMR spectra of GalNAc $\alpha$ ProNHCbz (**30**) in  $\text{CD}_3\text{OD}$

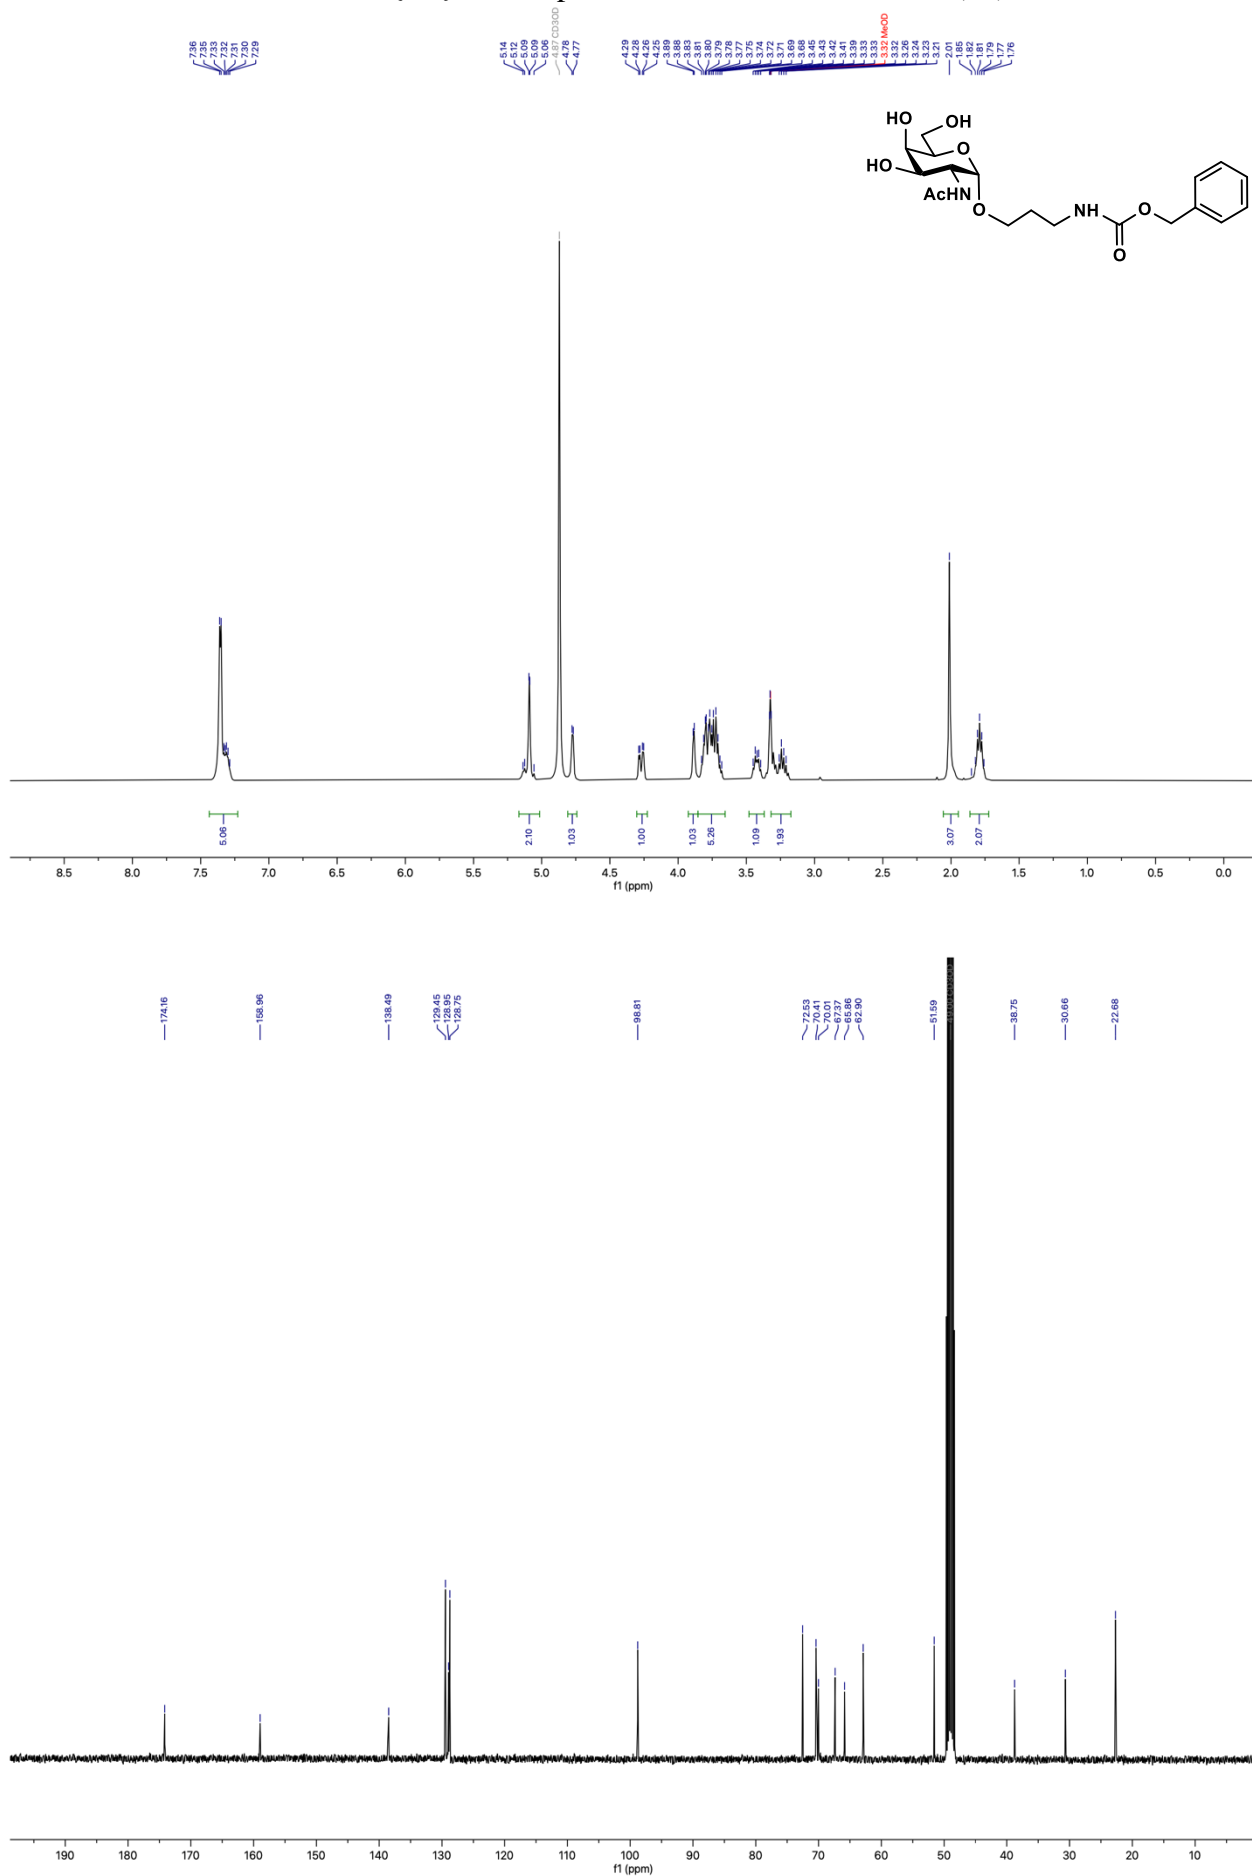

800 MHz  $^1\text{H}$  and 200 MHz  $^{13}\text{C}\{^1\text{H}\}$  NMR spectra of Neu5,7diN $_3\alpha$ 2-3Lac $\beta$ ProNHCbz (**31**) in D $_2$ O

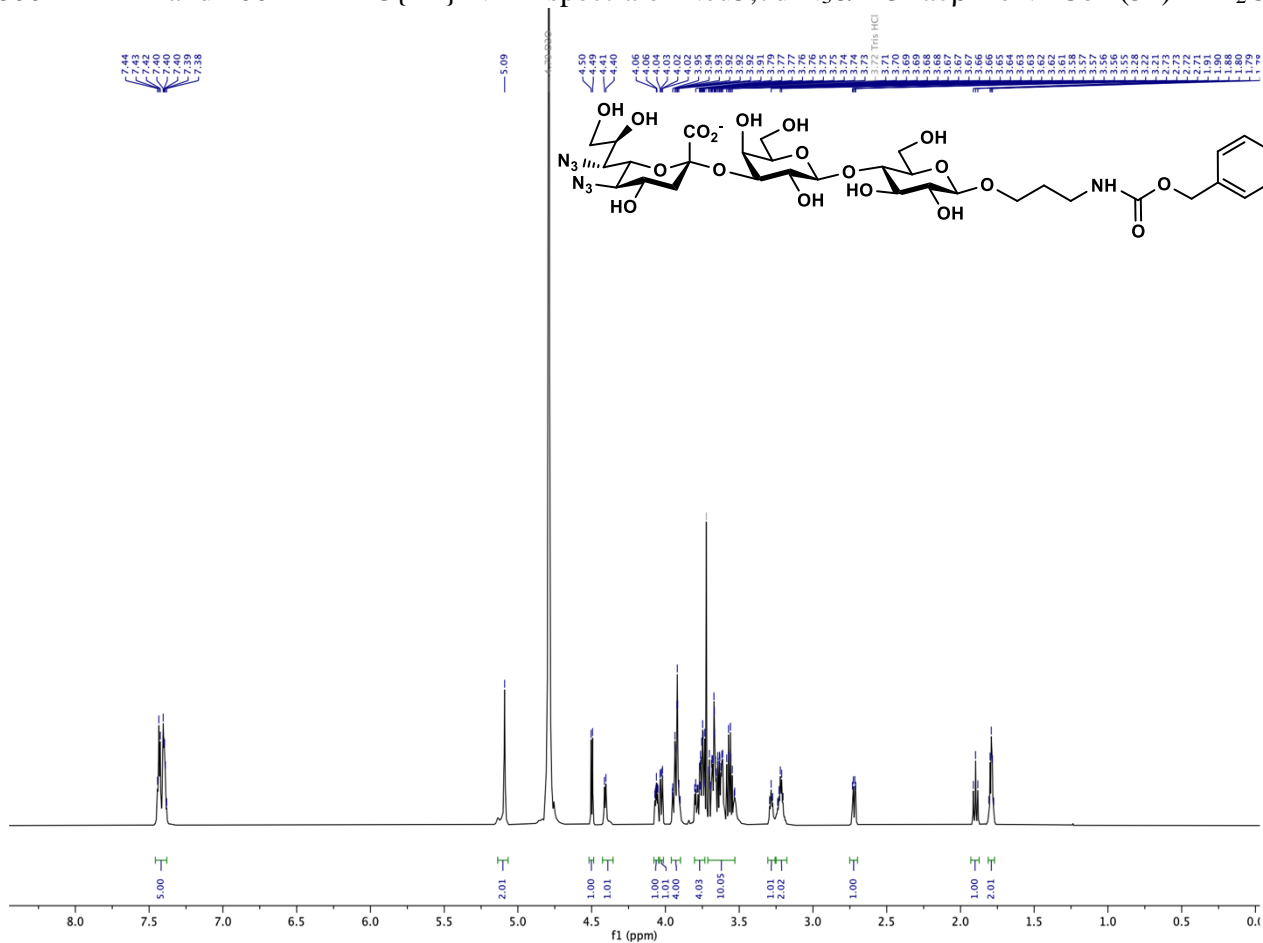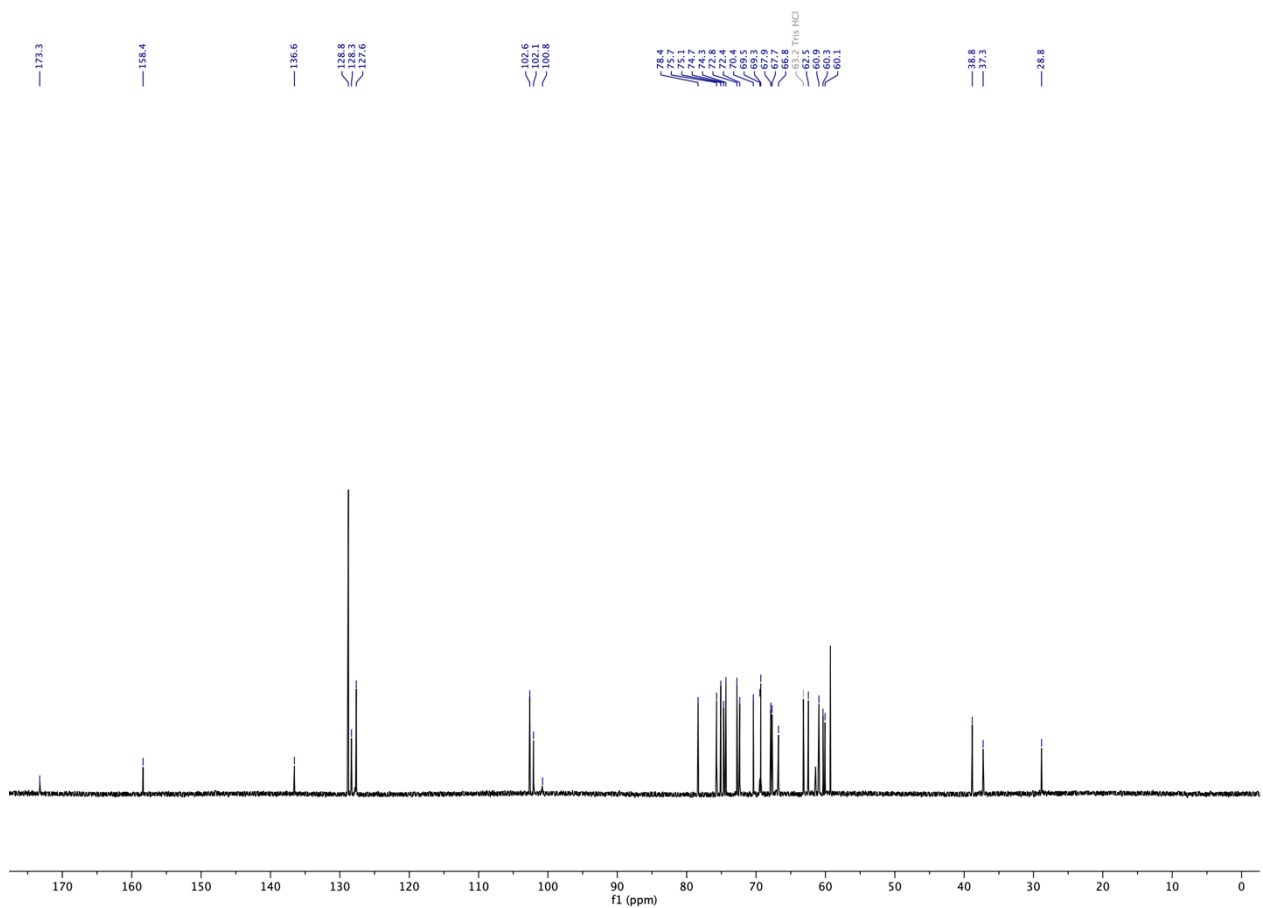

800 MHz  $^1\text{H}$  and 200 MHz  $^{13}\text{C}\{^1\text{H}\}$  NMR spectra of Neu5,7,9triN<sub>3</sub>α2-3LacβProNHCbz (**32**) in D<sub>2</sub>O

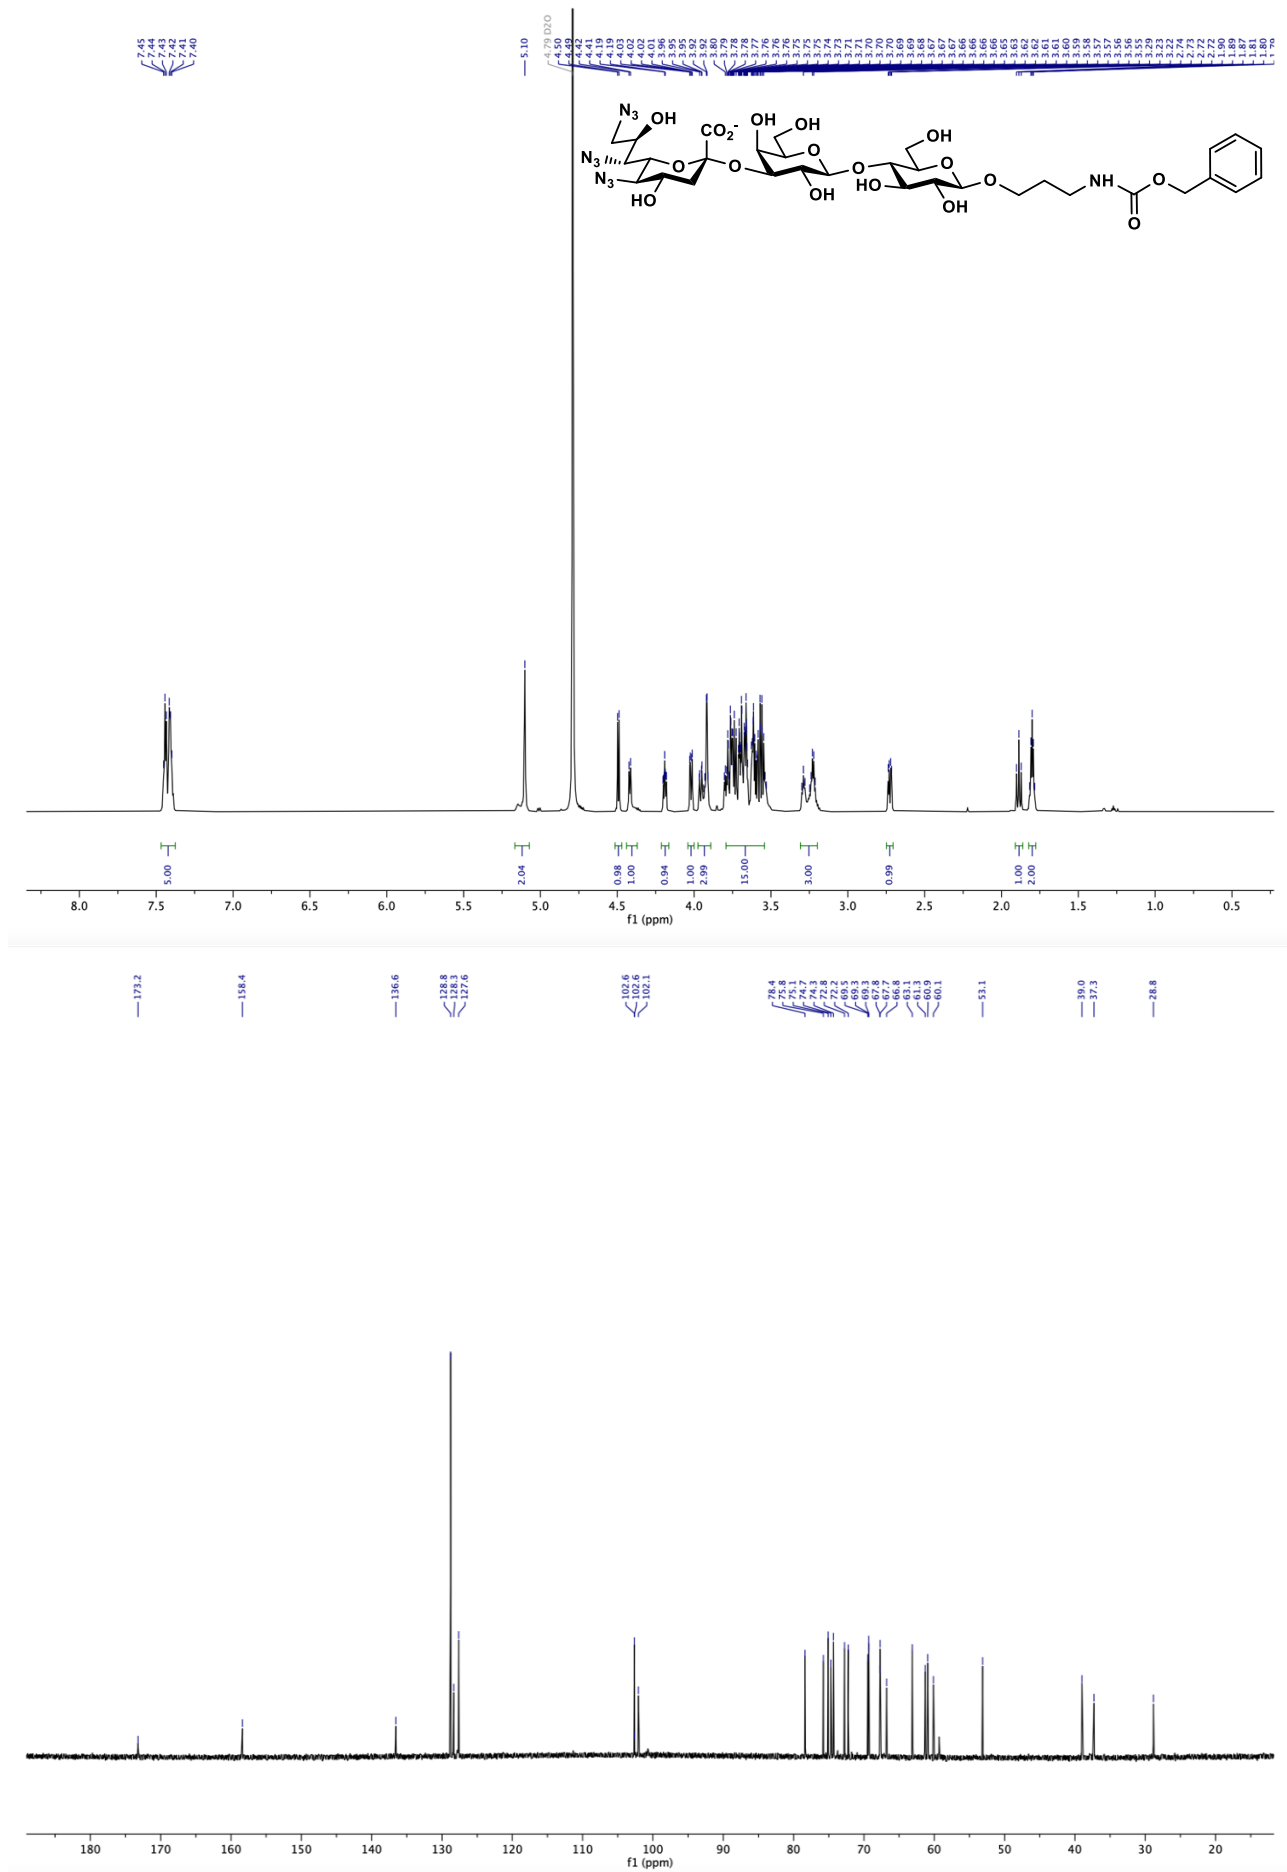

800 MHz  $^1\text{H}$  and 200 MHz  $^{13}\text{C}\{^1\text{H}\}$  NMR spectra of Neu5,7diN $\alpha$ 2-6Lac $\beta$ ProNHCbz (**33**) in D $_2$ O

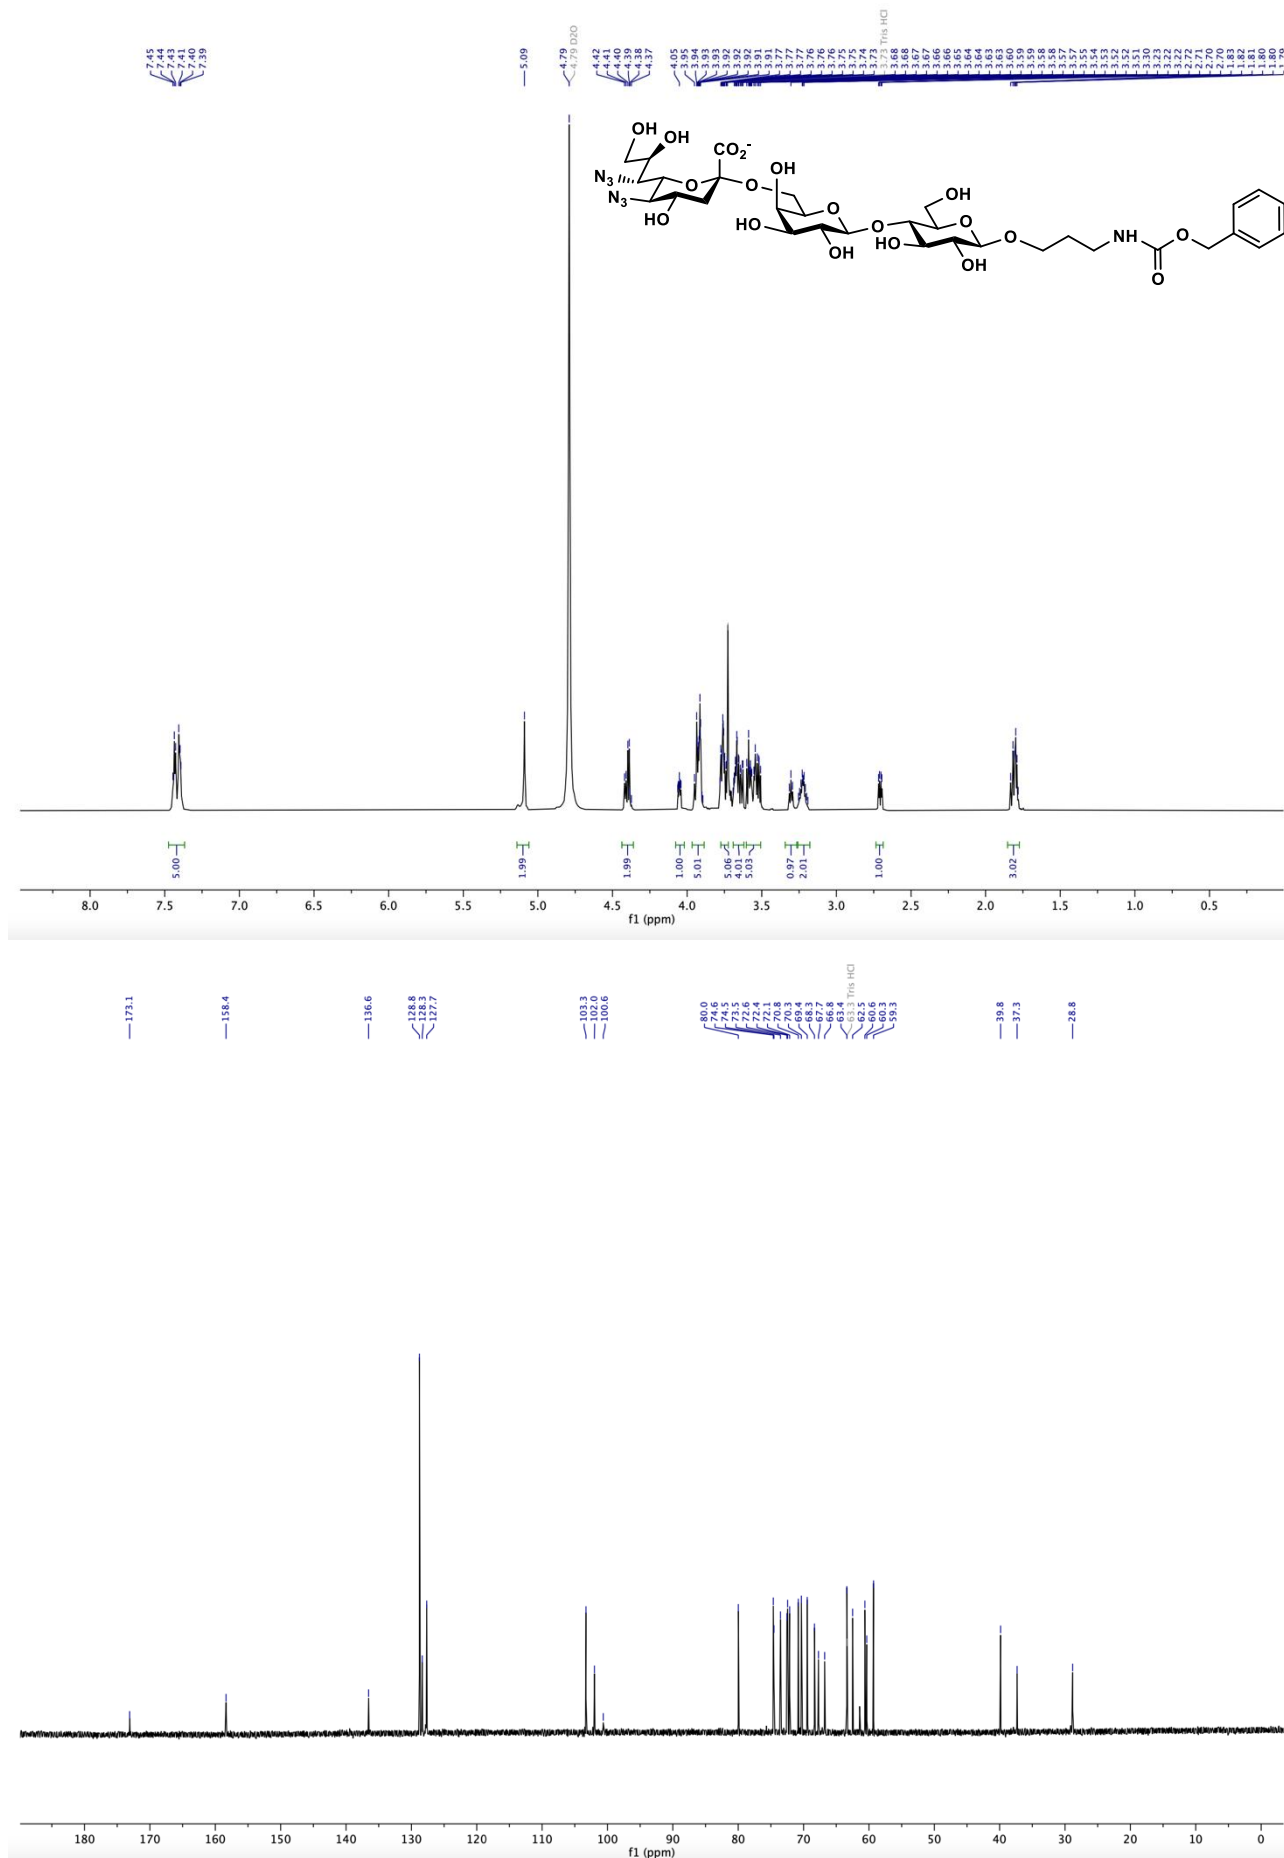

800 MHz  $^1\text{H}$  and 200 MHz  $^{13}\text{C}\{^1\text{H}\}$  NMR spectra of Neu5,7,9triN<sub>3</sub>α2-6LacβProNHCbz (**34**) in D<sub>2</sub>O

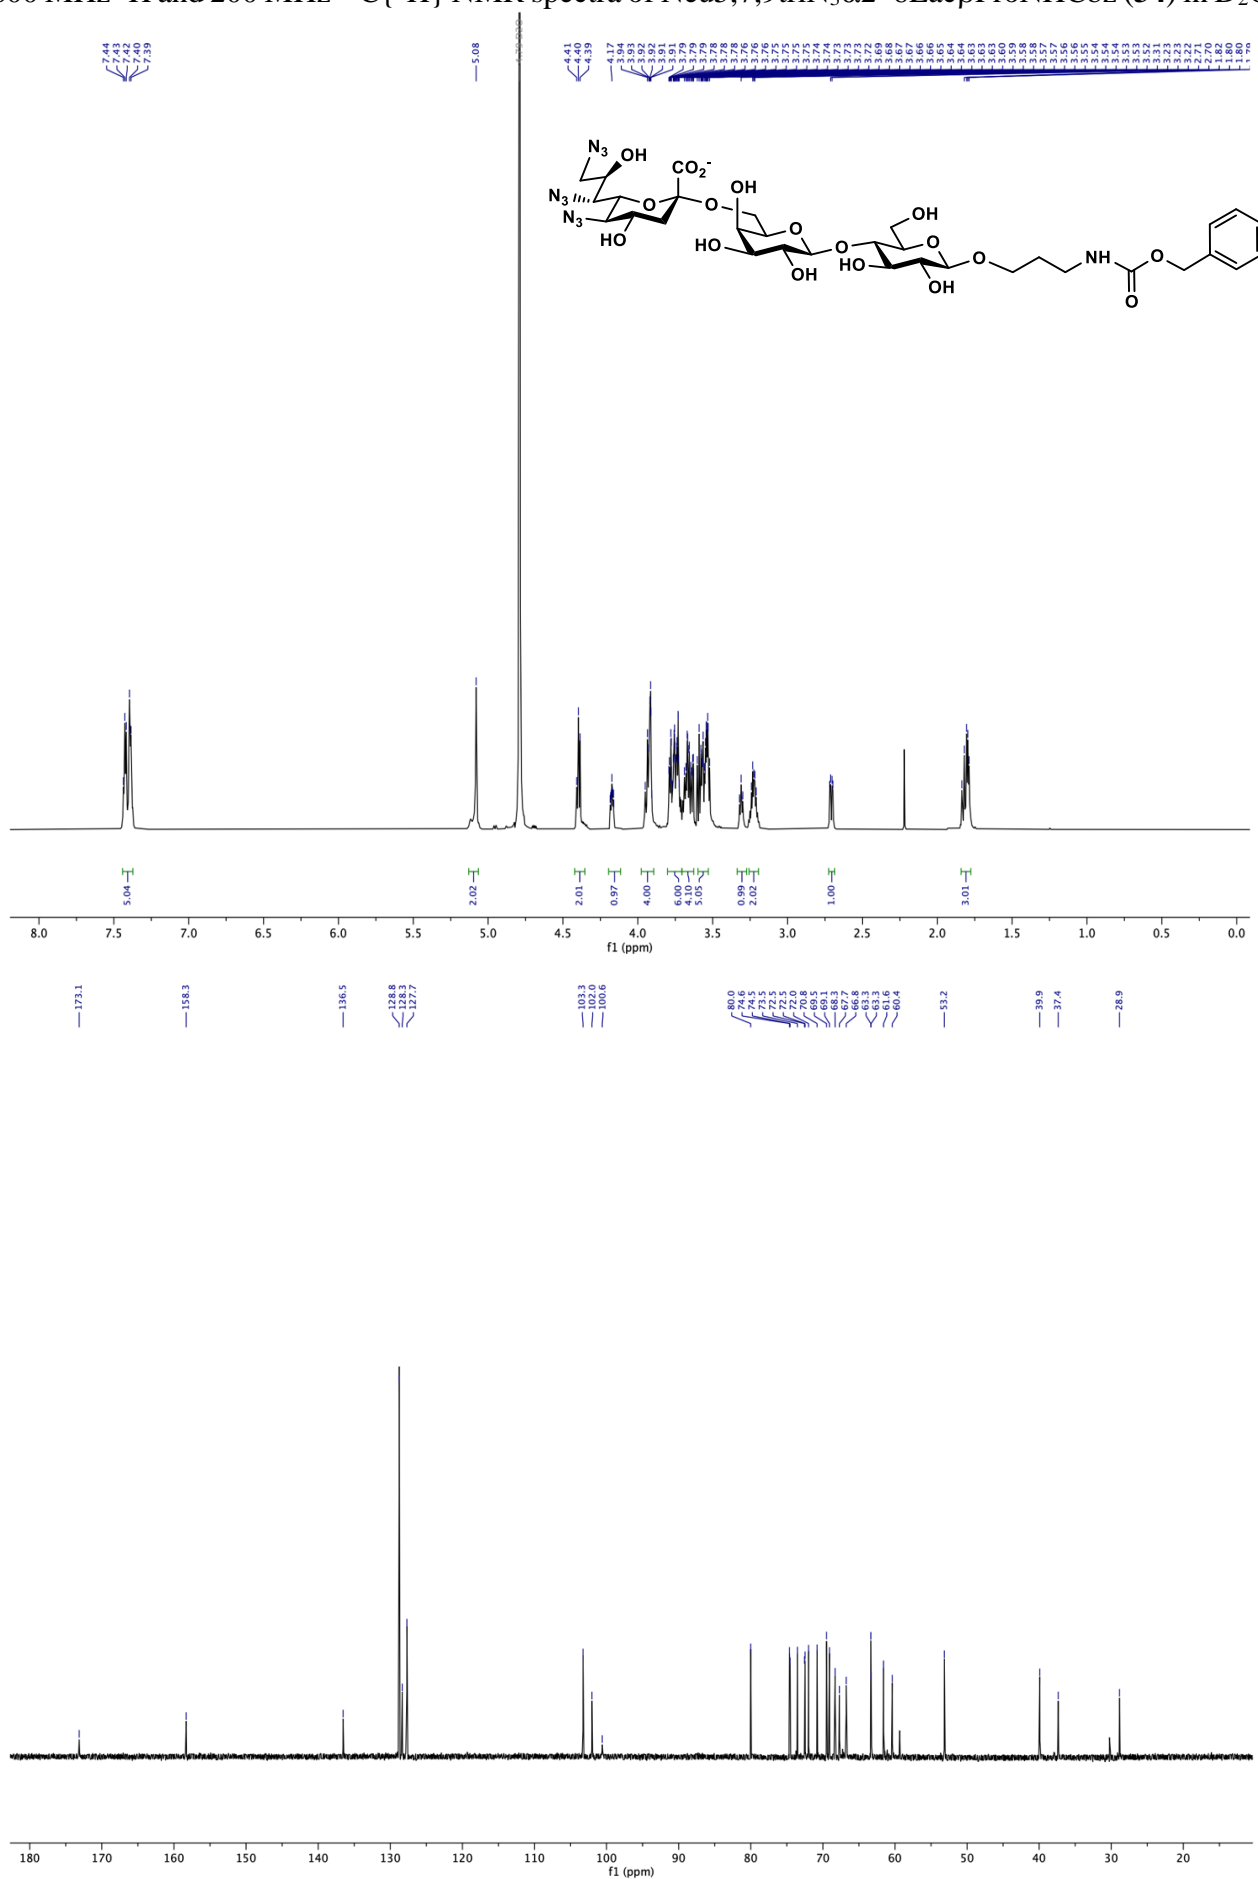

600 MHz  $^1\text{H}$  and 150 MHz  $^{13}\text{C}\{^1\text{H}\}$  NMR spectra of Neu5,7diN $_3\alpha$ 2-3LacNAc $\beta$ ProNHCBz (**35**) in  $\text{D}_2\text{O}$

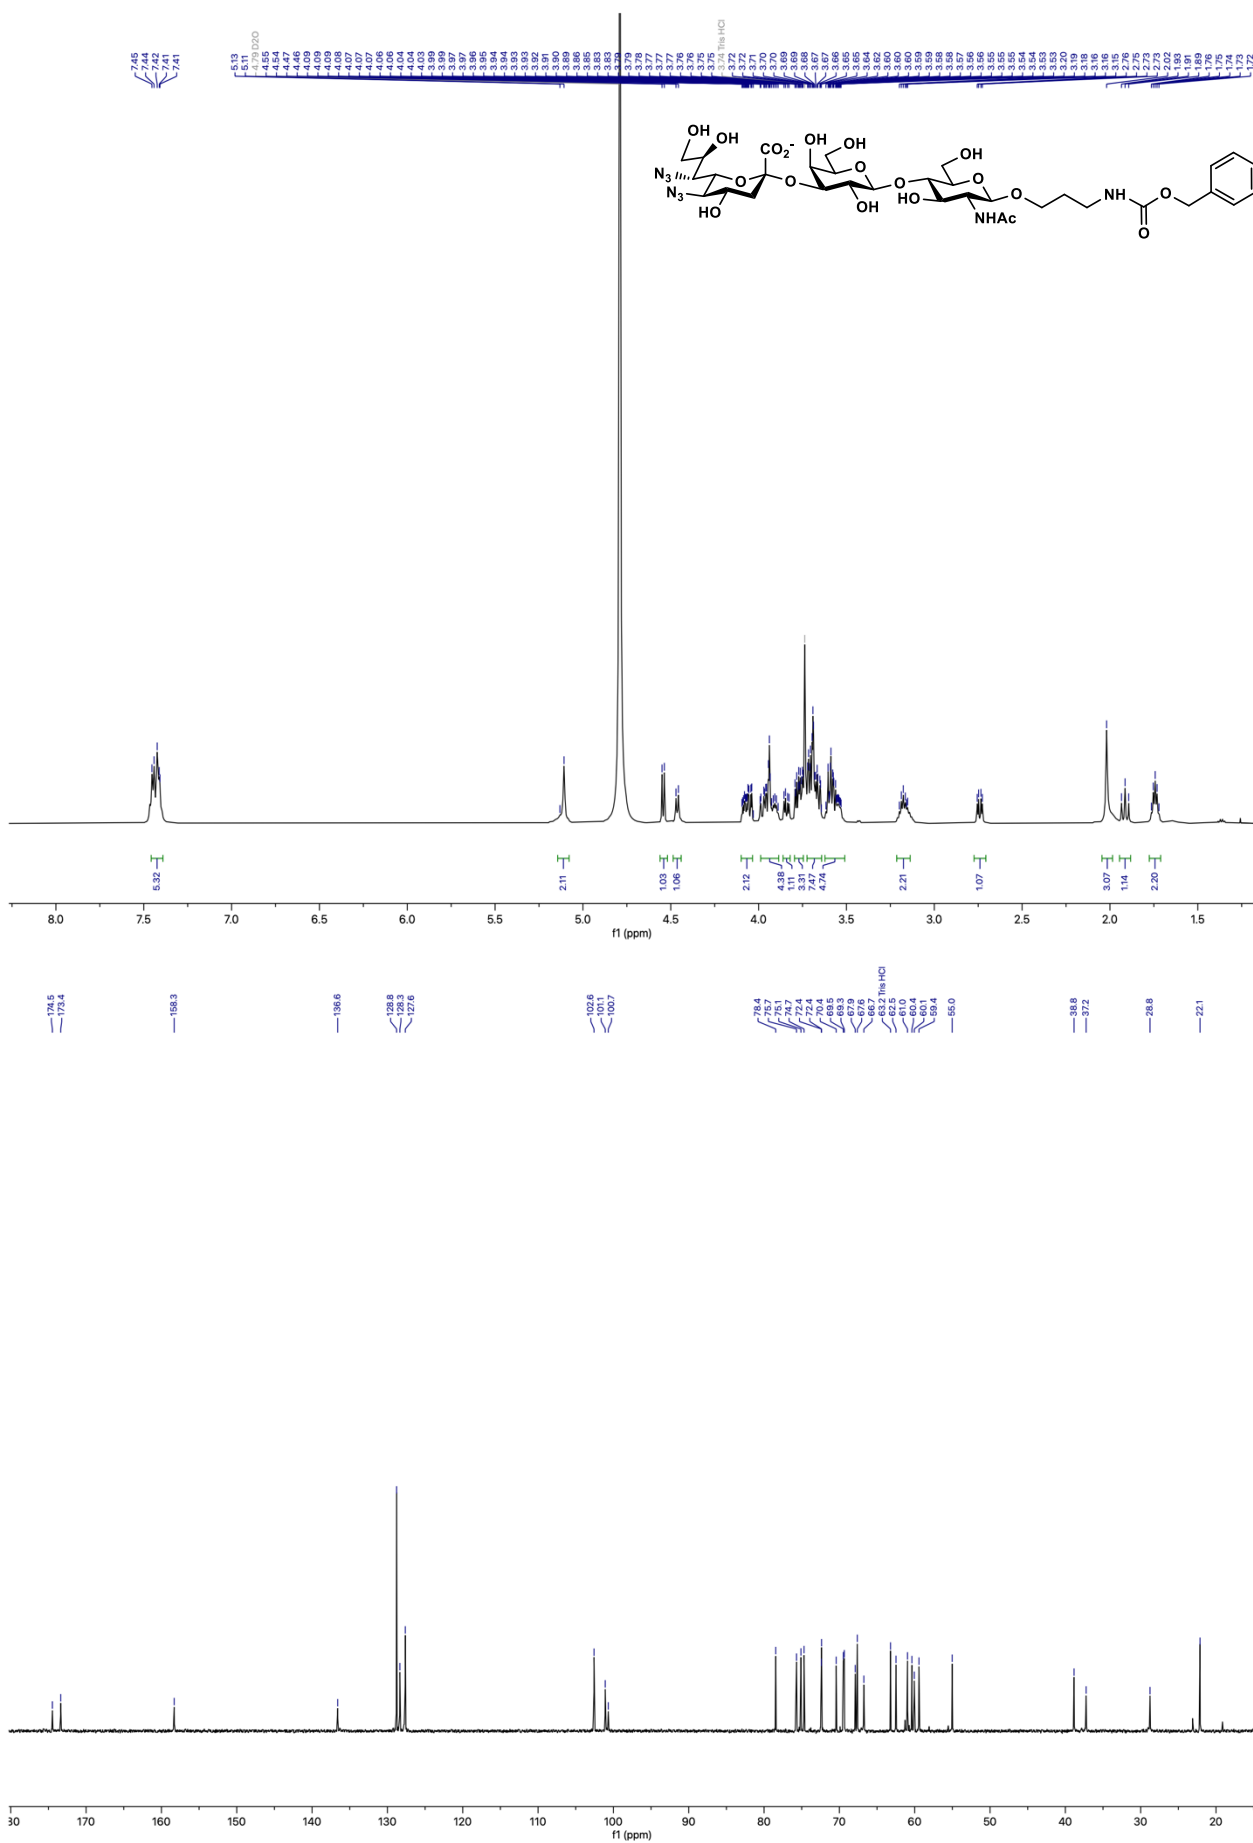

600 MHz  $^1\text{H}$  and 150 MHz  $^{13}\text{C}\{^1\text{H}\}$  NMR spectra of Neu5,7,9triN<sub>3</sub> $\alpha$ 2-3LacNAc $\beta$ ProNHCBz (**36**) in D<sub>2</sub>O

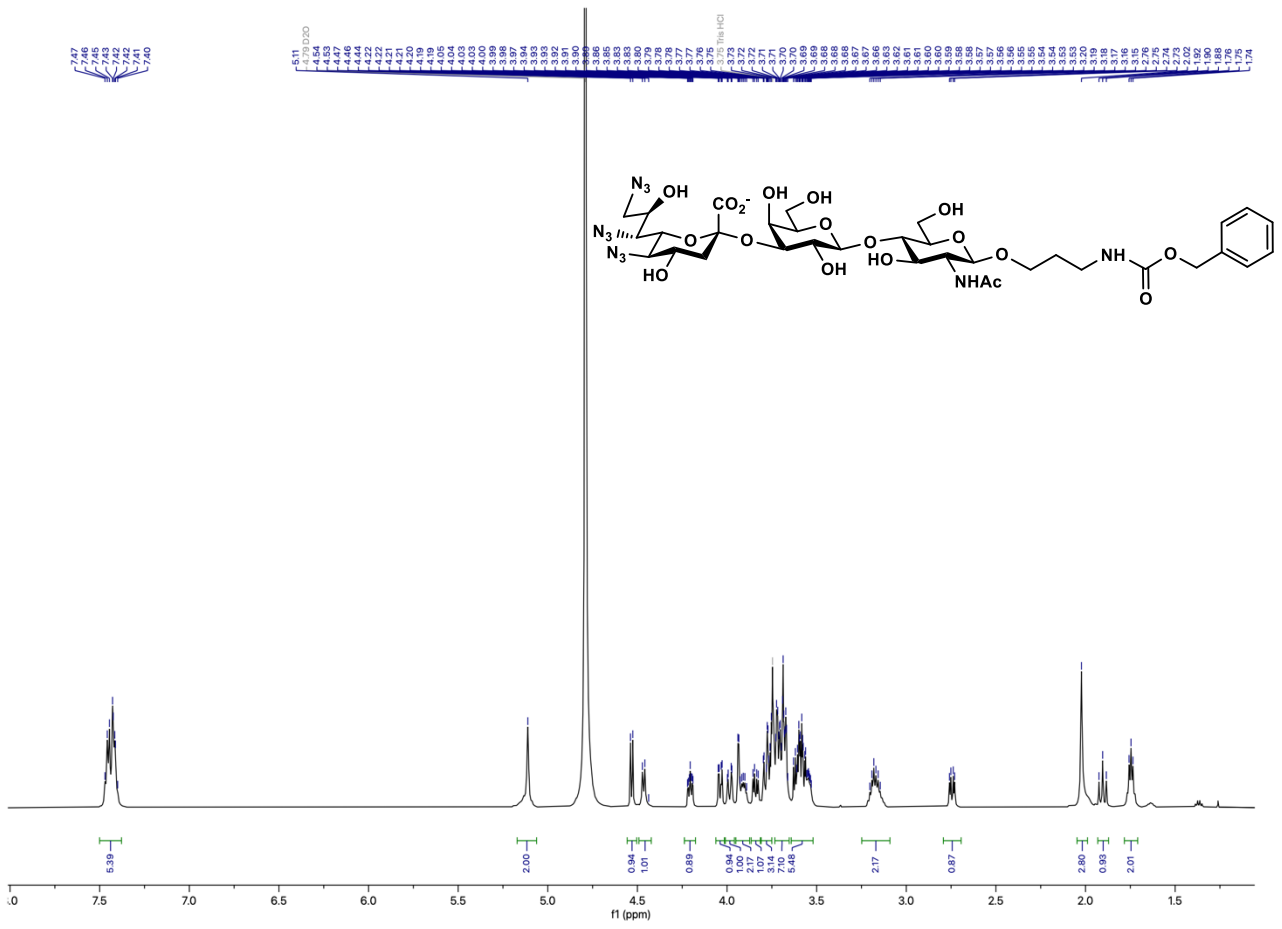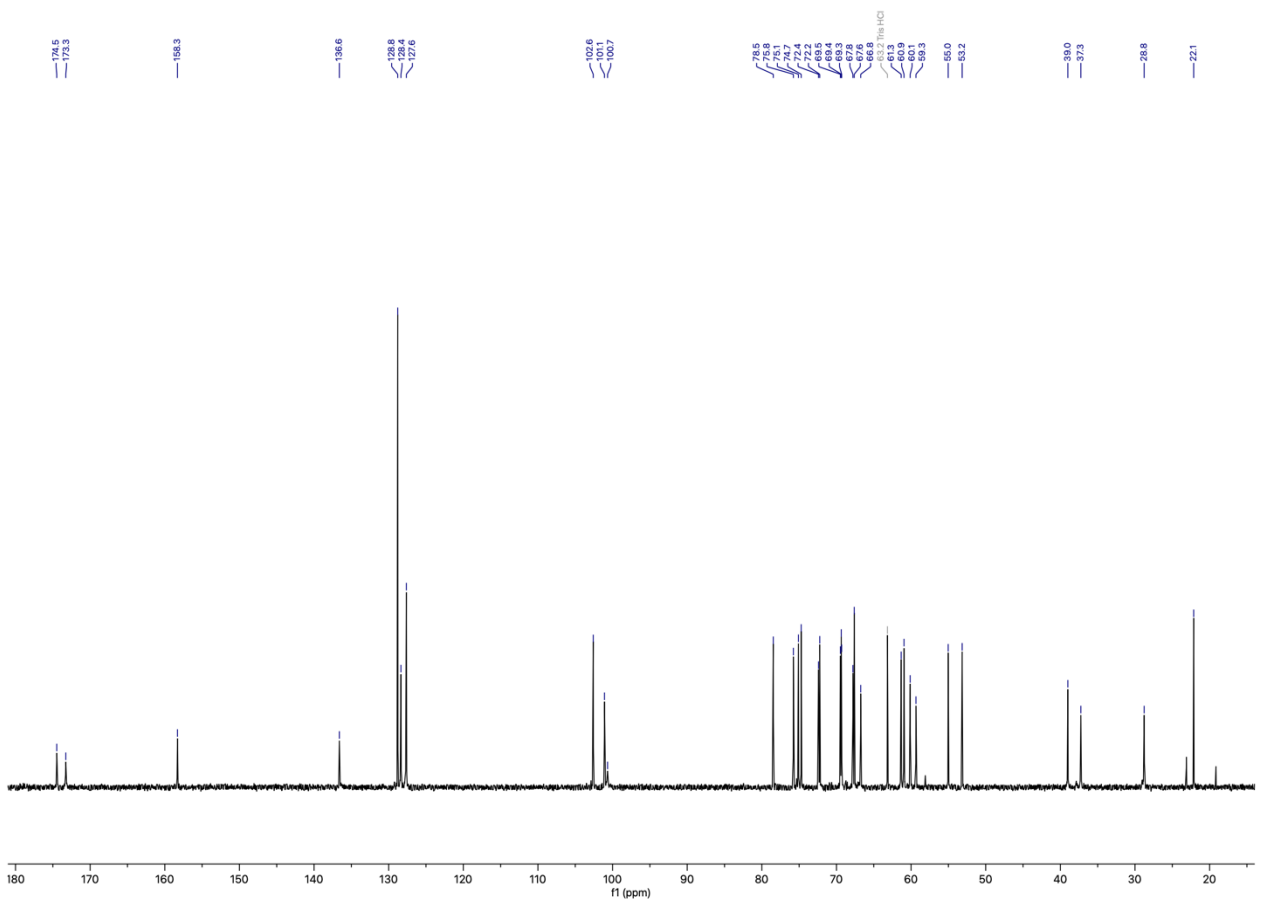



600 MHz  $^1\text{H}$  and 150 MHz  $^{13}\text{C}\{^1\text{H}\}$  NMR spectra of Neu5,7diN $_3\alpha$ 2-6LacNAc $\beta$ ProNHCbz (**37**) in D $_2$ O

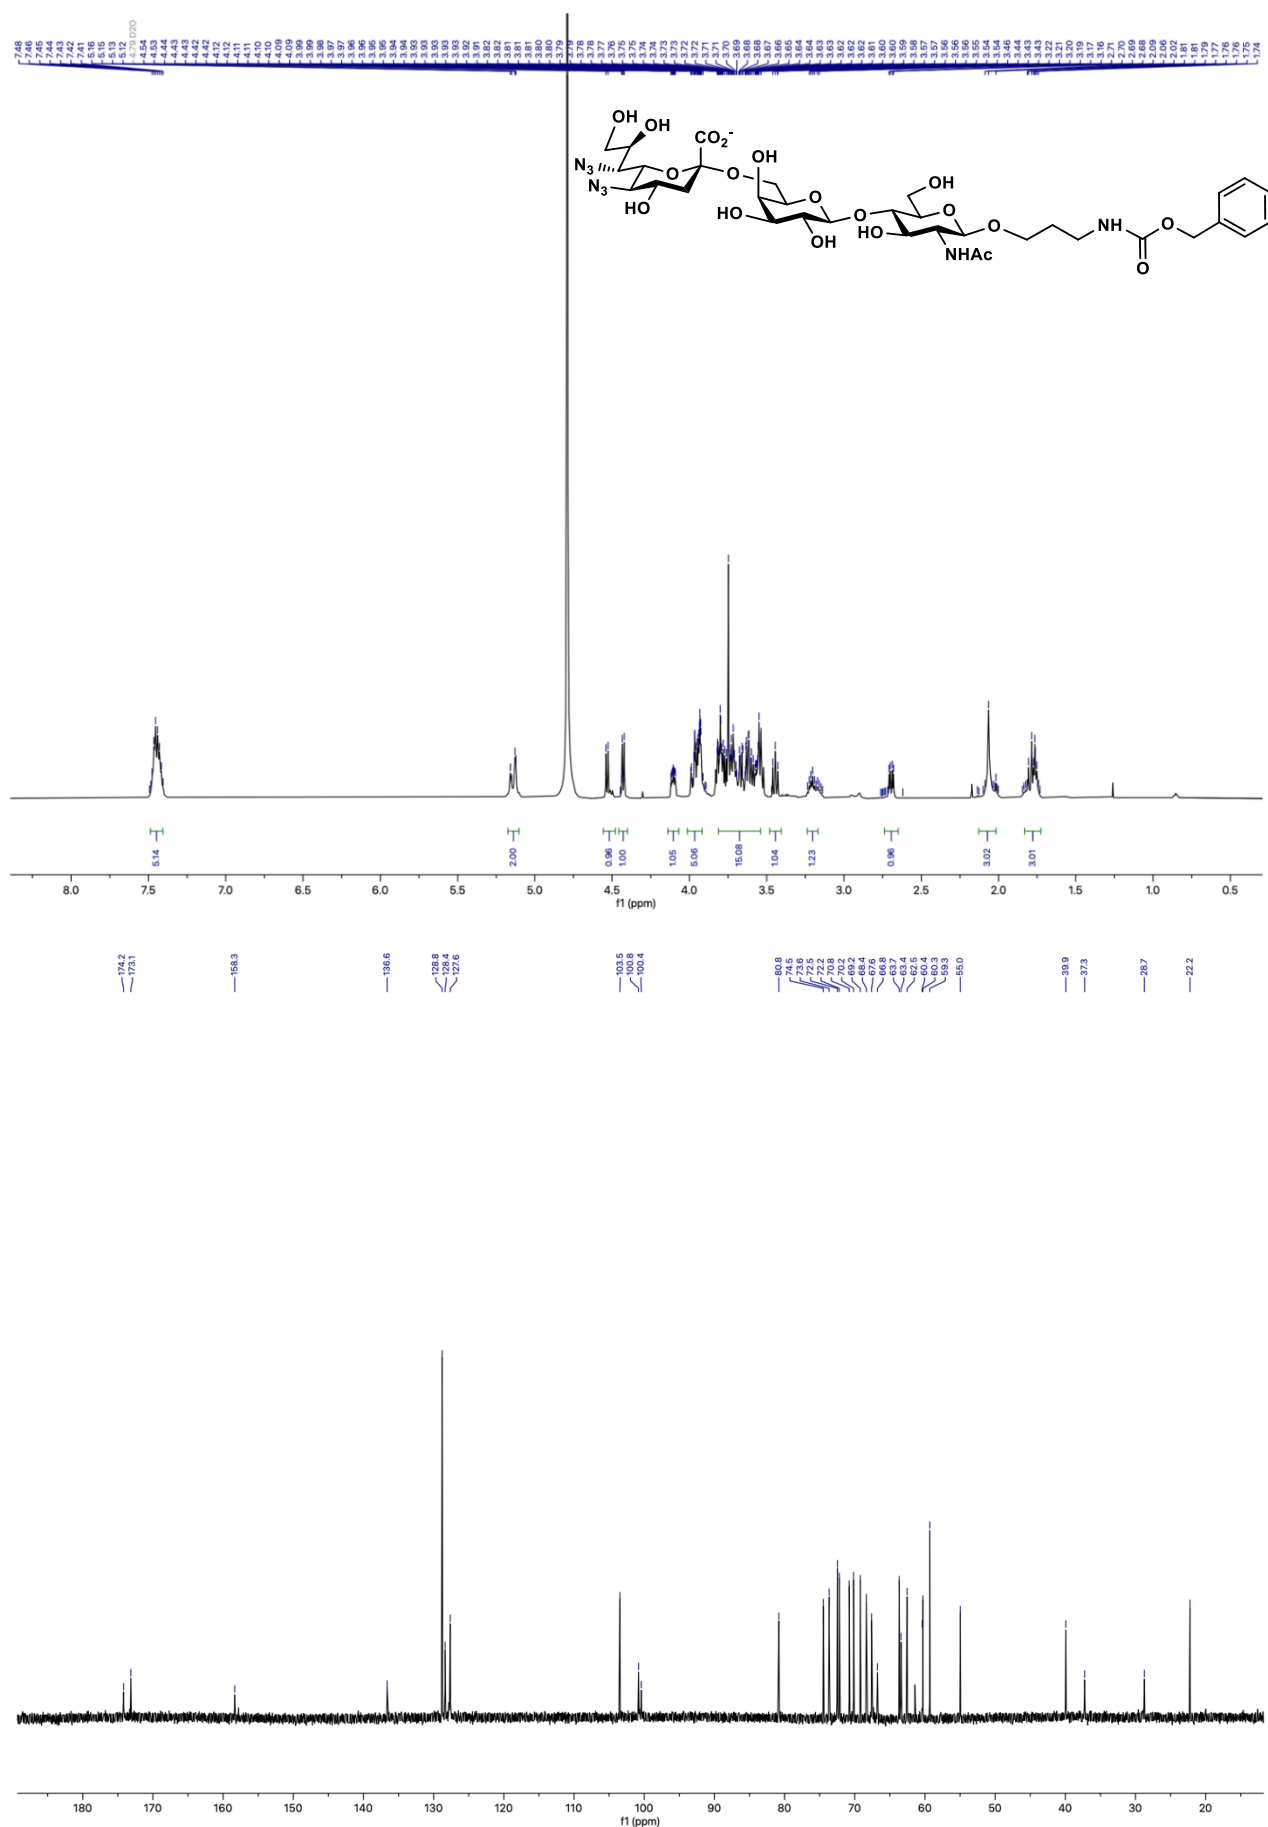

600 MHz  $^1\text{H}$  and 150 MHz  $^{13}\text{C}\{^1\text{H}\}$  NMR spectra of Neu5,7,9triN<sub>3</sub> $\alpha$ 2-6LacNAc $\beta$ ProNHCBz (**38**) in D<sub>2</sub>O

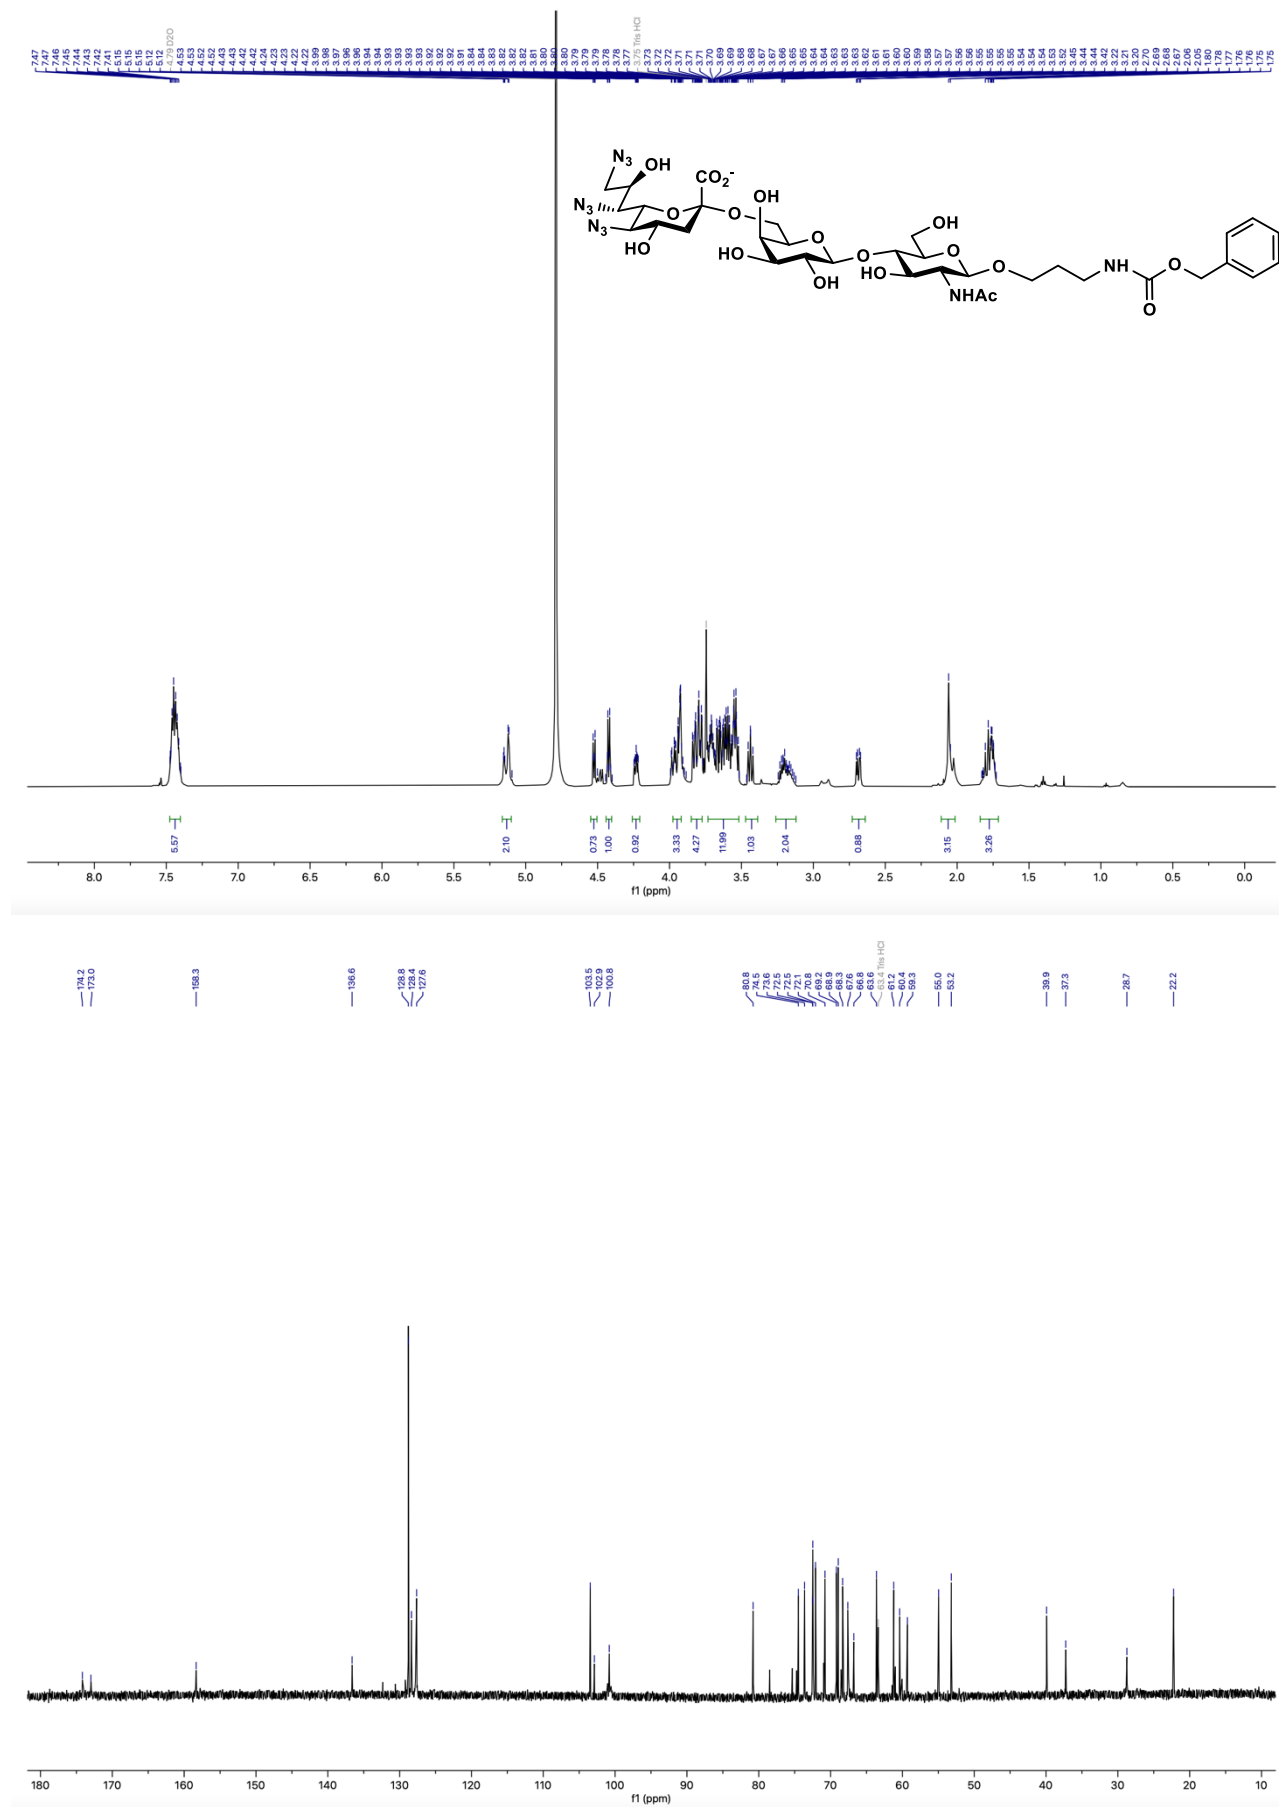

800 MHz  $^1\text{H}$  and 200 MHz  $^{13}\text{C}\{^1\text{H}\}$  NMR spectra of Neu5,7diN<sub>3</sub>α2–3Galβ1–3GalNAcβProNHCbz (**39**) in D<sub>2</sub>O

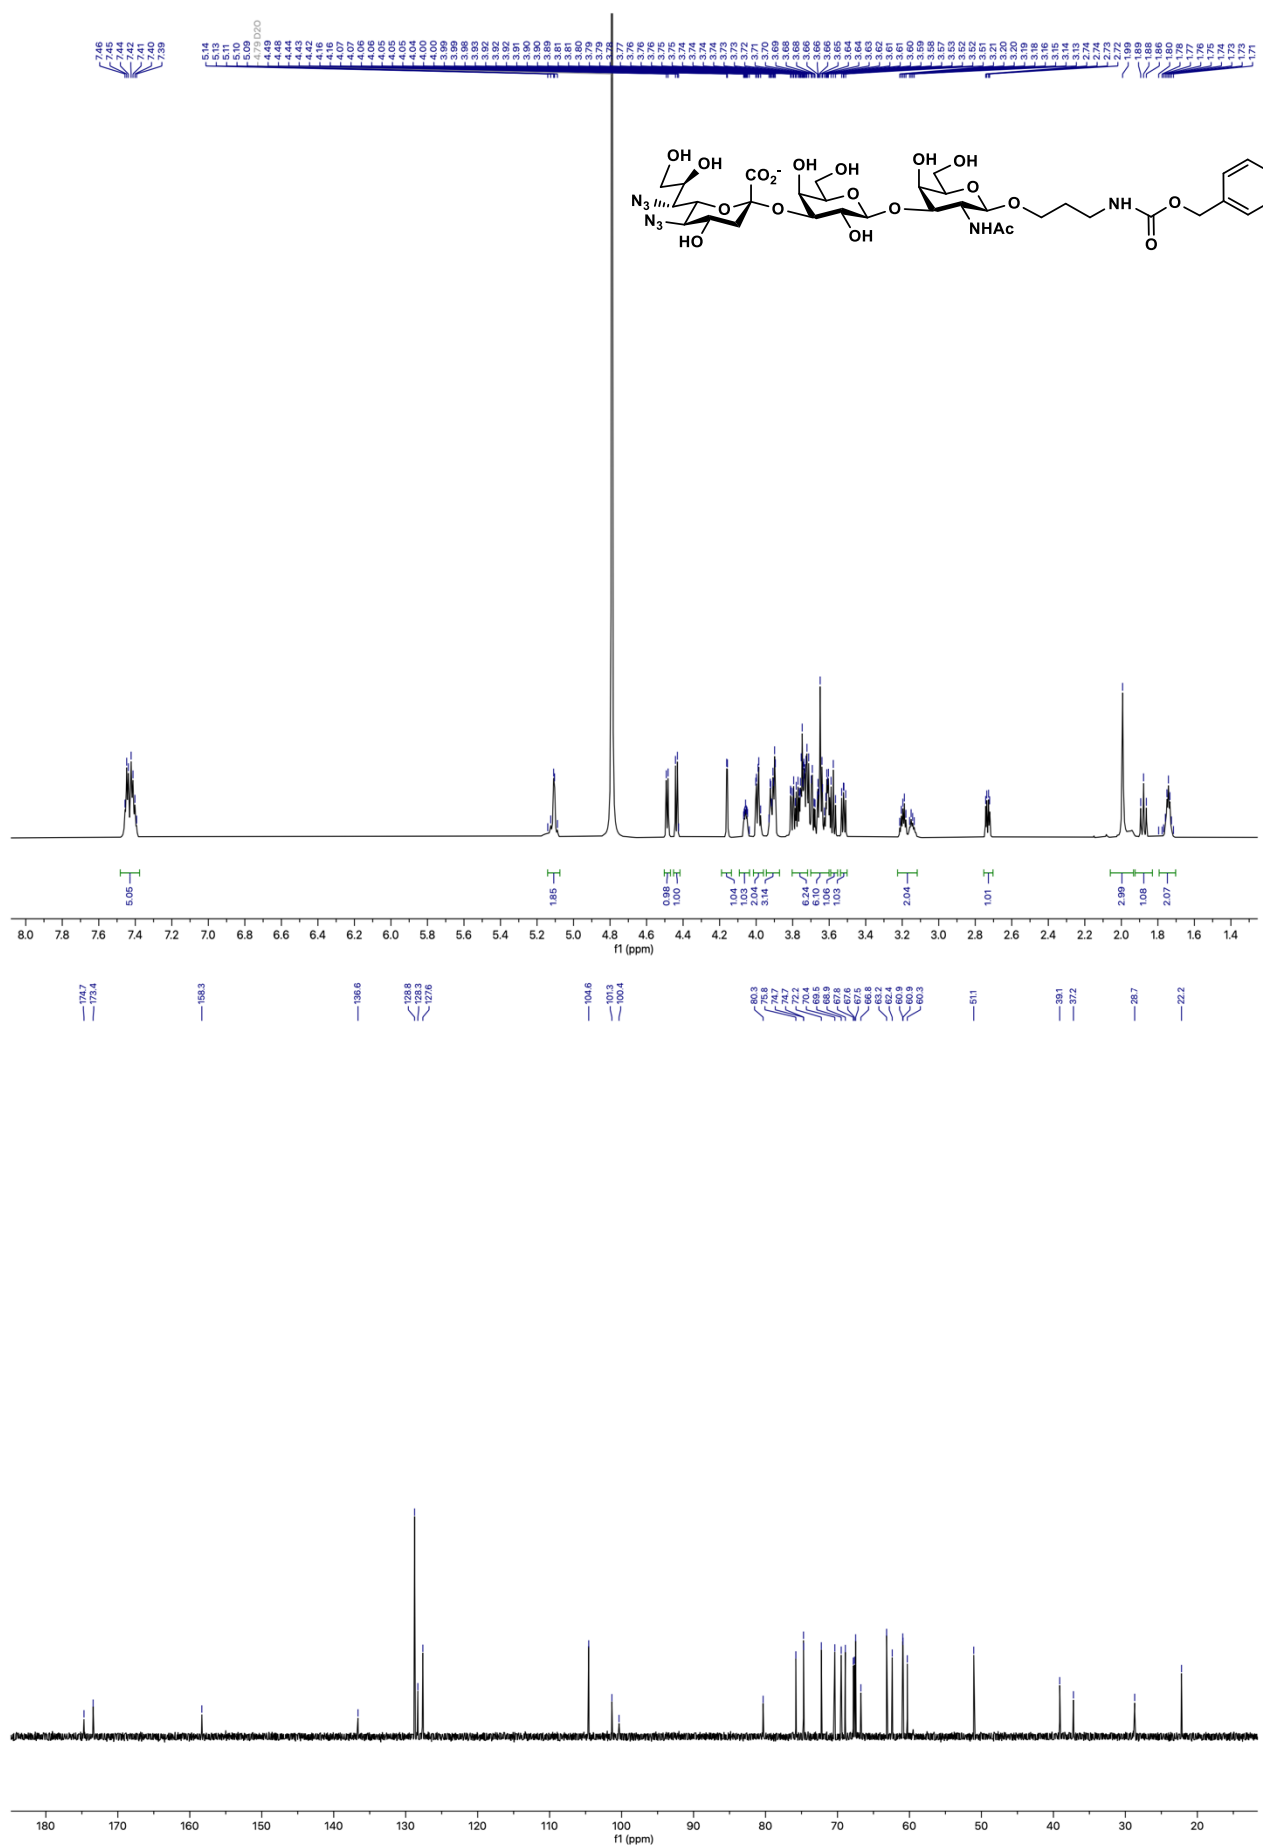

800 MHz  $^1\text{H}$  and 200 MHz  $^{13}\text{C}\{^1\text{H}\}$  NMR spectra of Neu5,7,9triN $_3\alpha$ 2-3Gal $\beta$ 1-3GalNAc $\beta$ ProNHCBz (**40**) in D $_2$ O

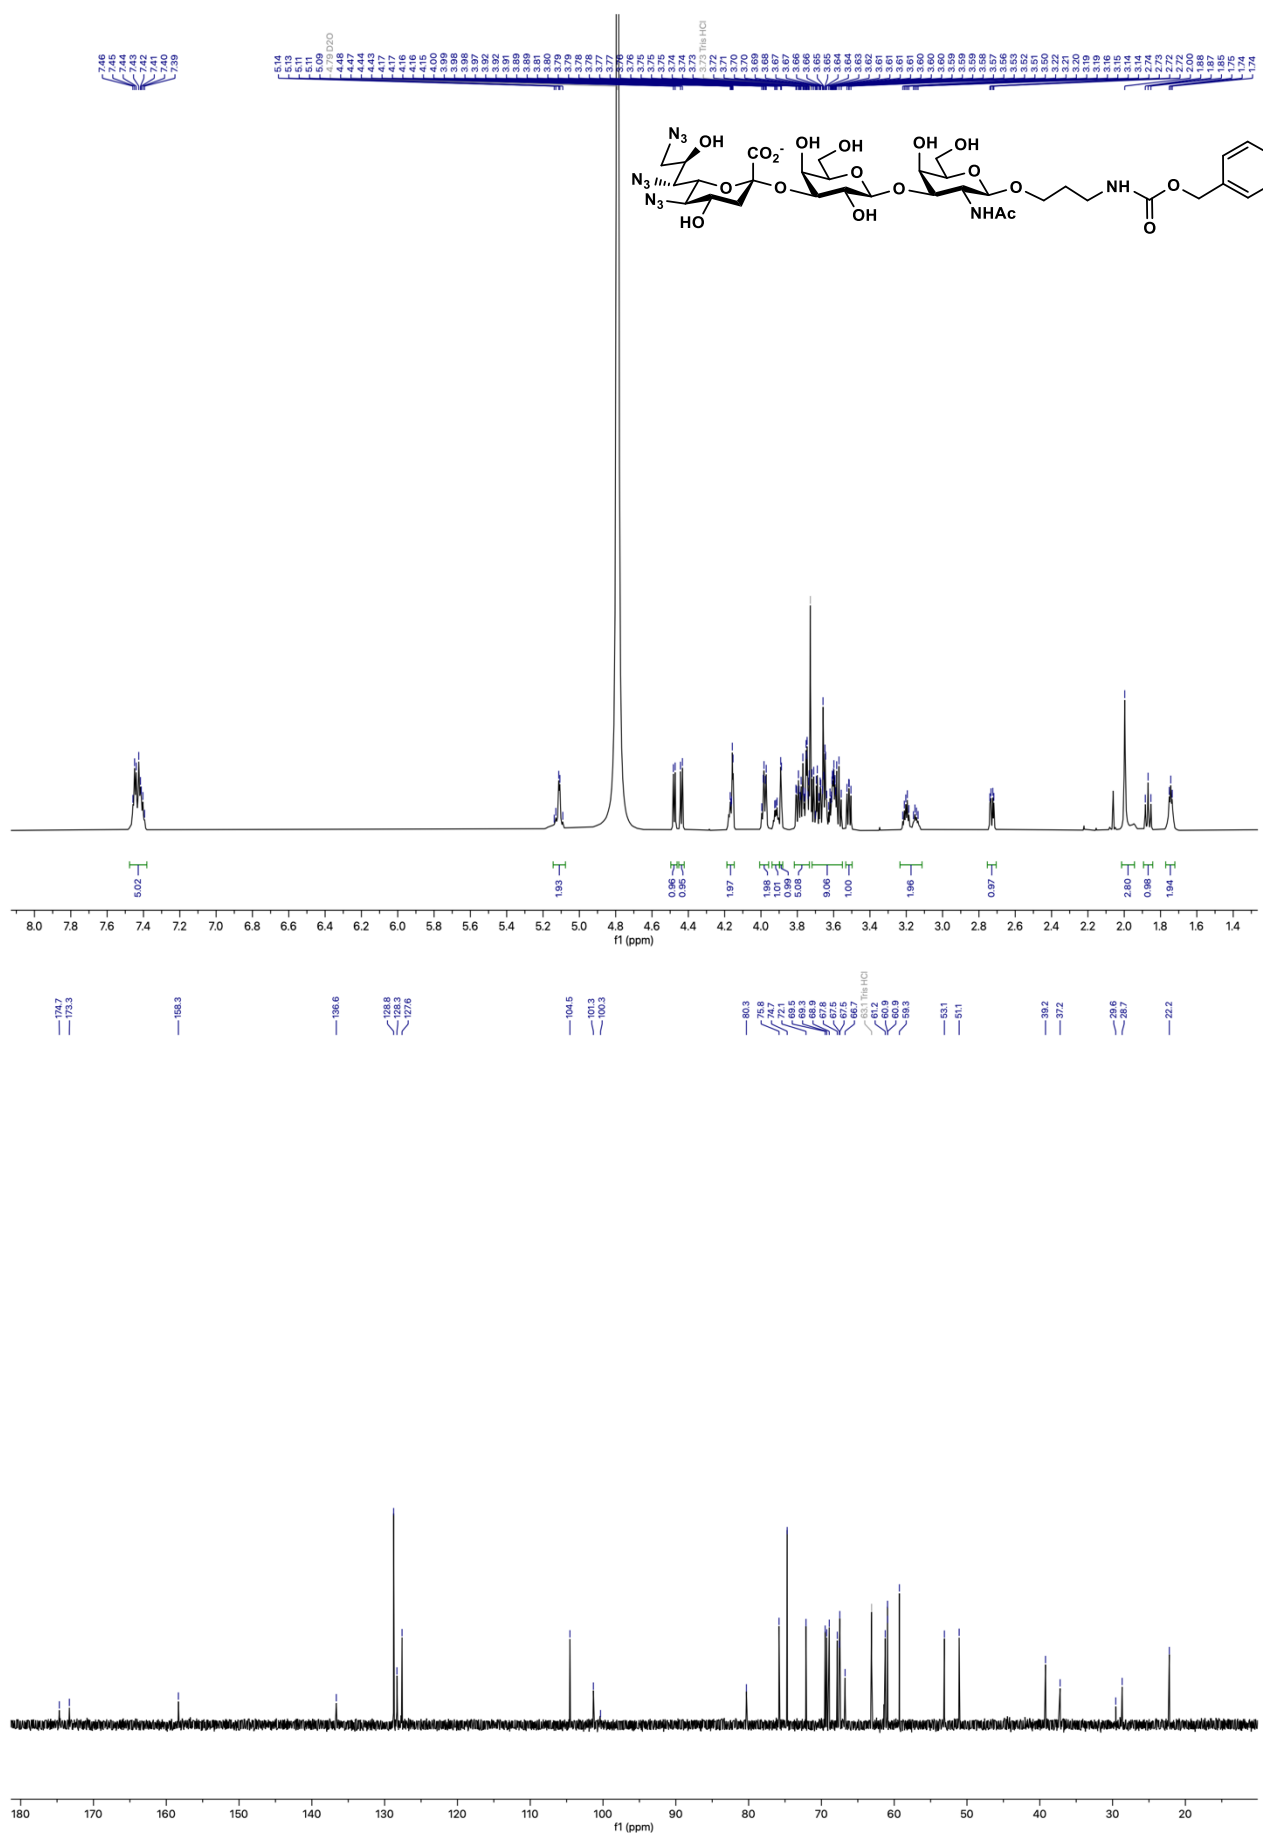

600 MHz  $^1\text{H}$  and 150 MHz  $^{13}\text{C}\{^1\text{H}\}$  NMR spectra of Neu5,7diN<sub>3</sub> $\alpha$ 2-6Gal $\beta$ 1-3GalNAc $\beta$ ProNHCbz (**41**) in D<sub>2</sub>O

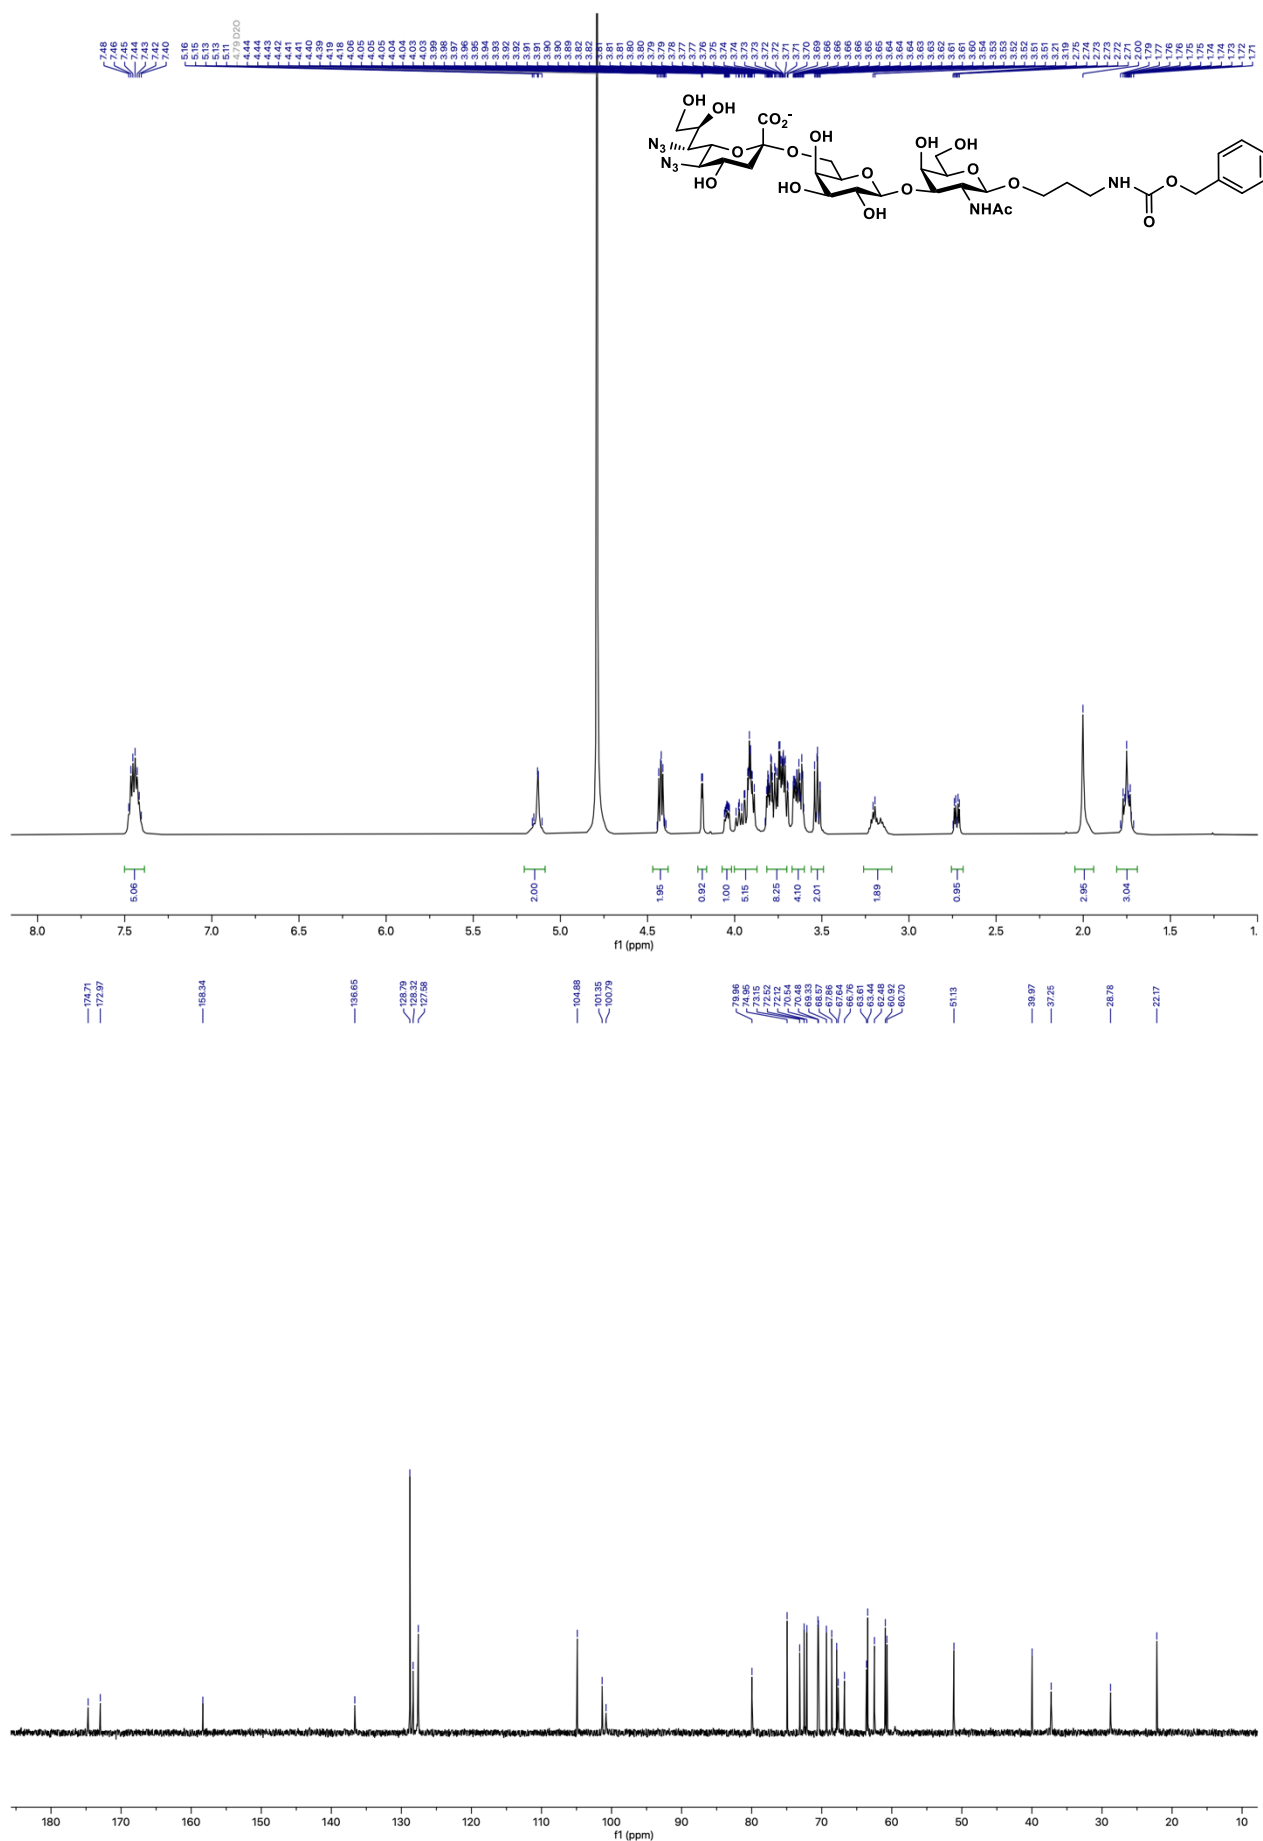

600 MHz  $^1\text{H}$  and 150 MHz  $^{13}\text{C}\{^1\text{H}\}$  NMR spectra of Neu5,7,9triN $_3\alpha$ 2-6Gal $\beta$ 1-3GalNAc $\beta$ ProNHCBz (**42**) in D $_2$ O

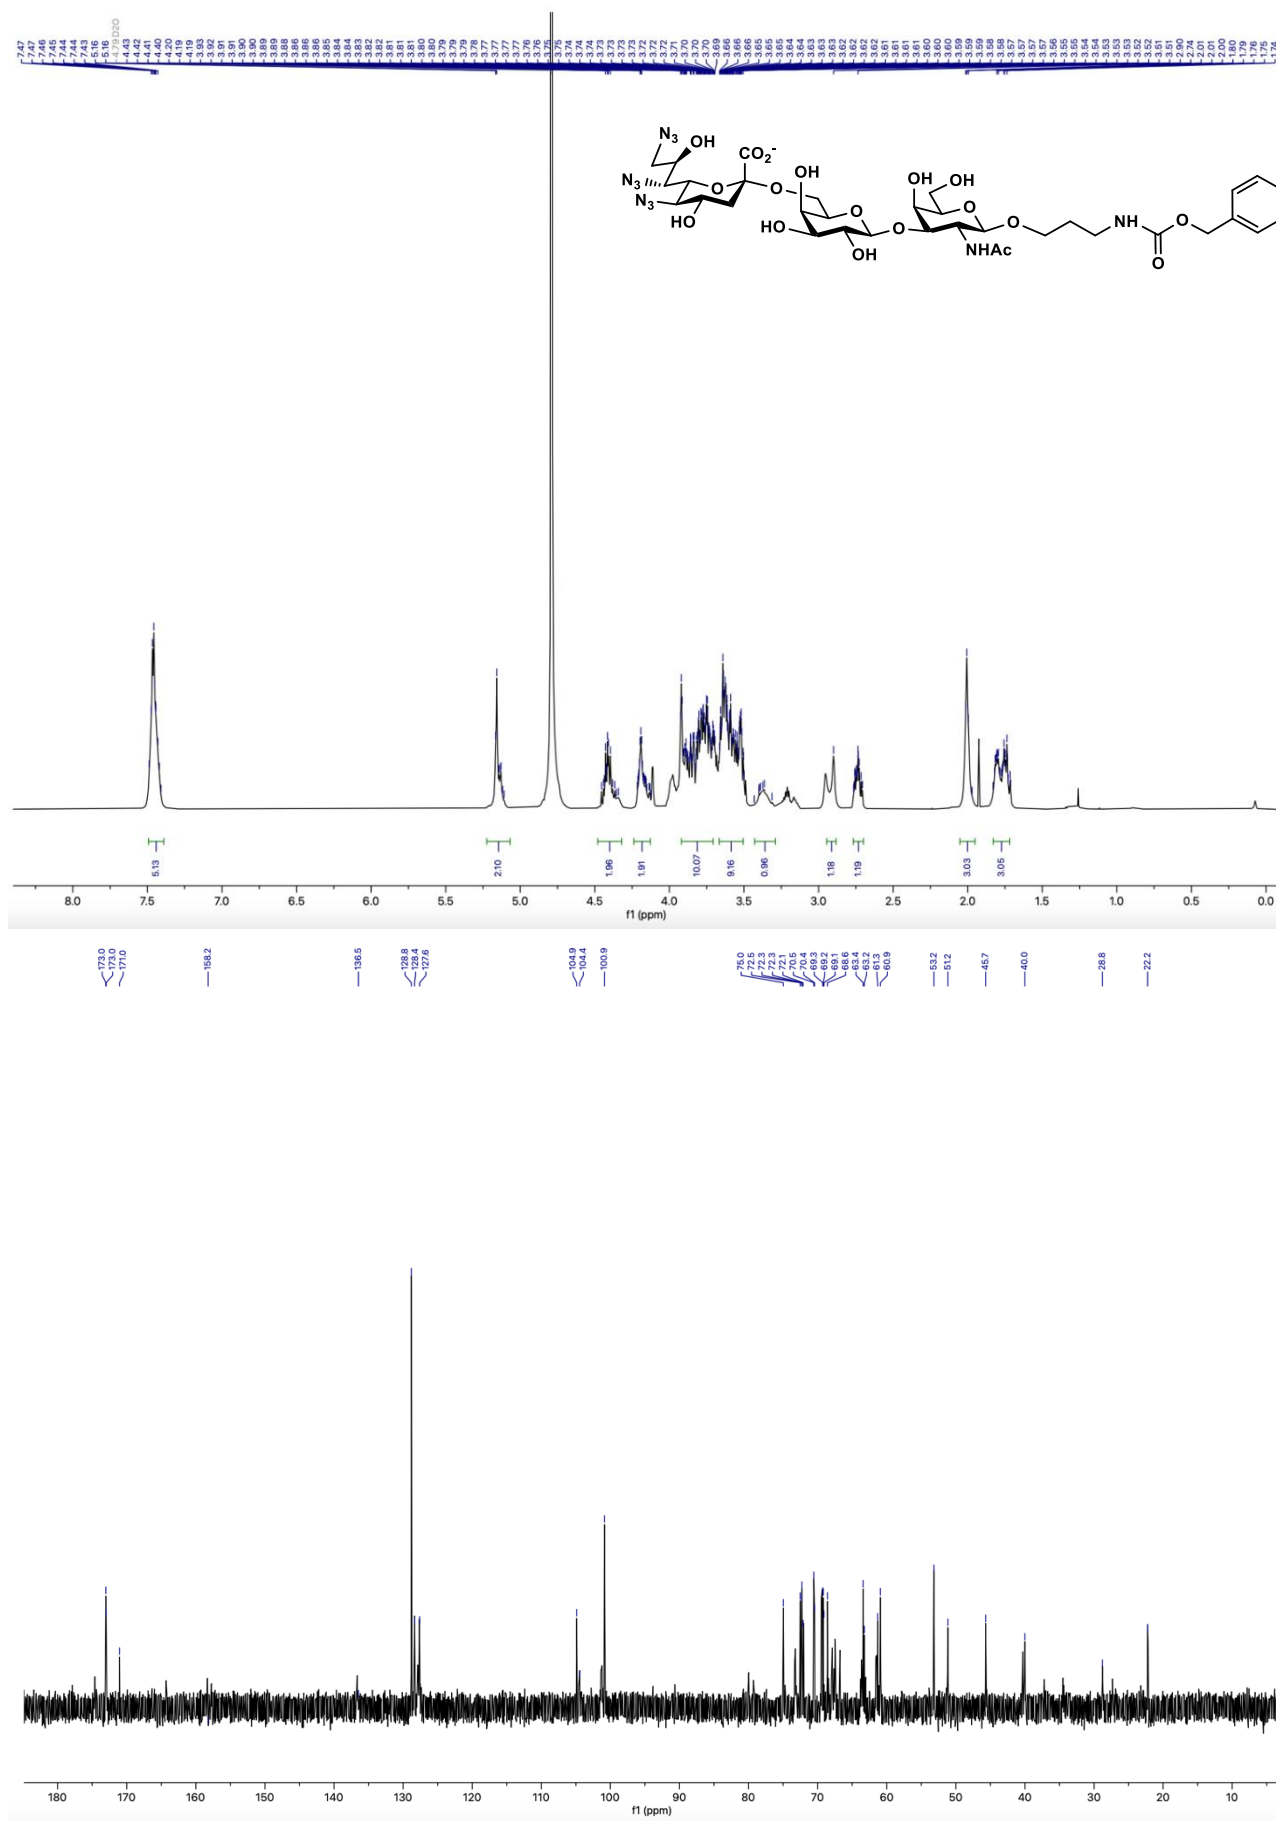

400 MHz  $^1\text{H}$  and 100 MHz  $^{13}\text{C}\{^1\text{H}\}$  NMR spectra of Neu5,7diN $_3\alpha$ 2-3Gal $\beta$ 1-3GalNAc $\alpha$ ProNHCbz (43) in D $_2$ O

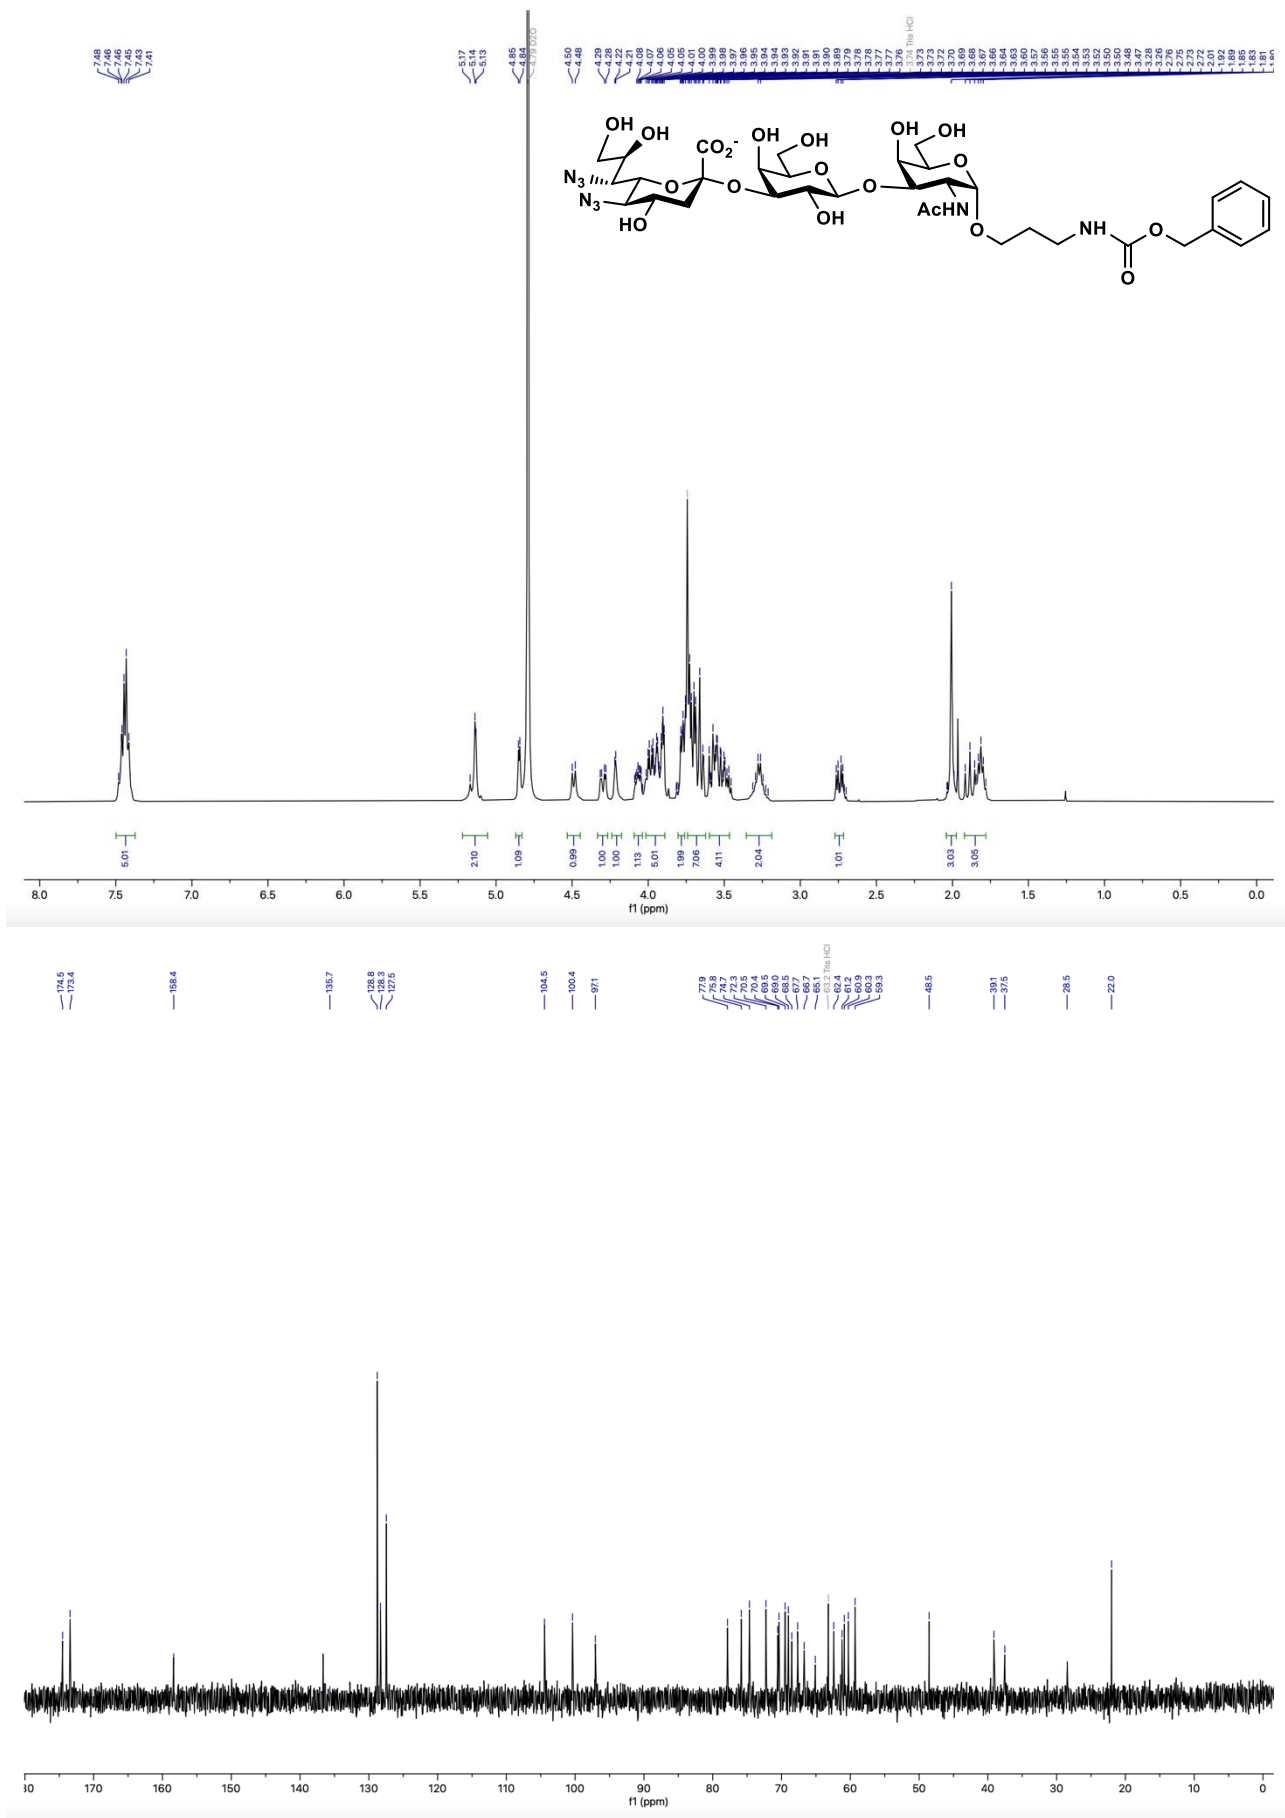

400 MHz  $^1\text{H}$  and 150 MHz  $^{13}\text{C}\{^1\text{H}\}$  NMR spectra of Neu5,7,9triN $_3\alpha$ 2-3Gal $\beta$ 1-3GalNAc $\alpha$ ProNHCbz (**44**) in D $_2$ O

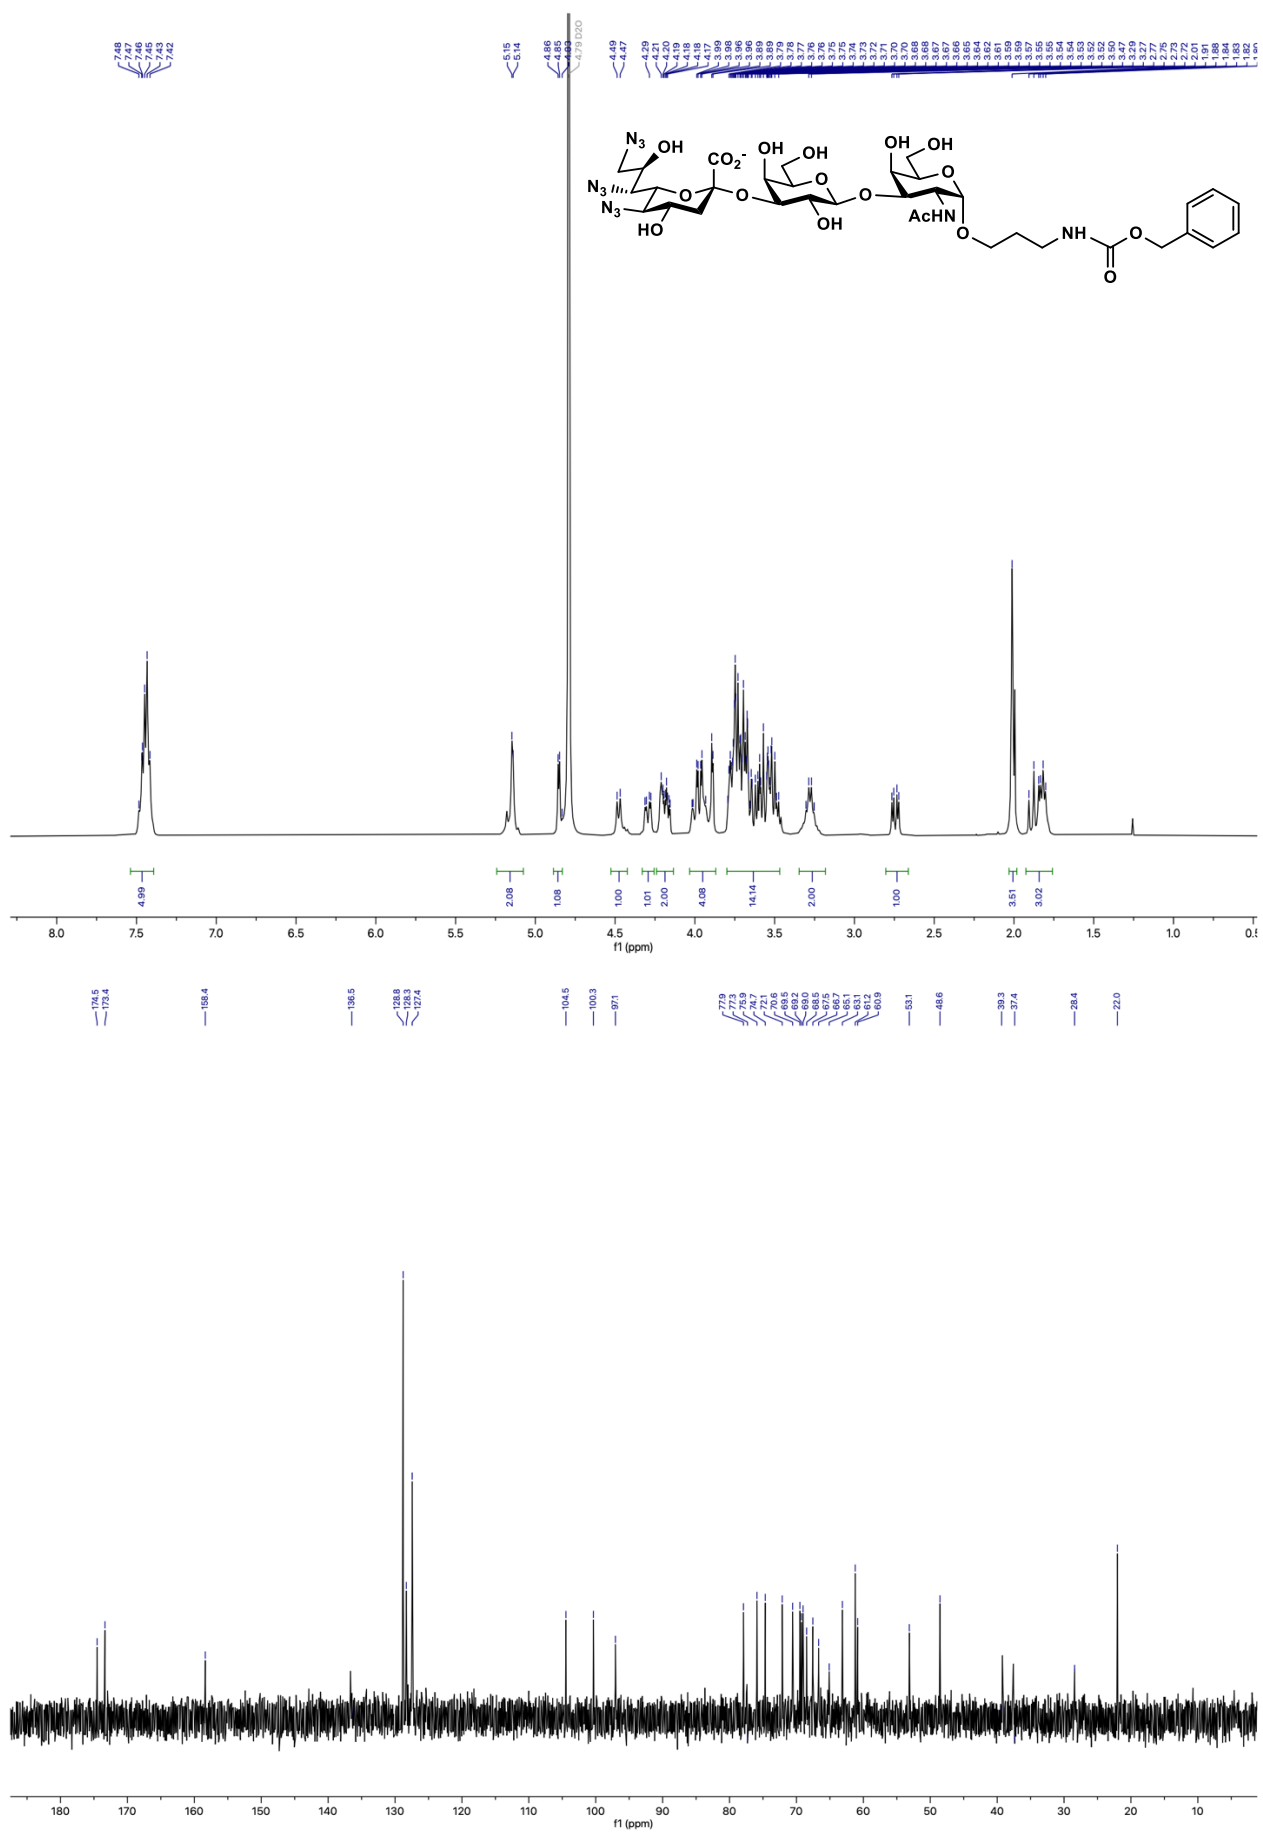



600 MHz  $^1\text{H}$  and 150 MHz  $^{13}\text{C}\{^1\text{H}\}$  NMR spectra of Neu5,7diN $_3\alpha$ 2-6Gal $\beta$ 1-3GalNAc $\alpha$ ProNHCBz (45) in D $_2$ O

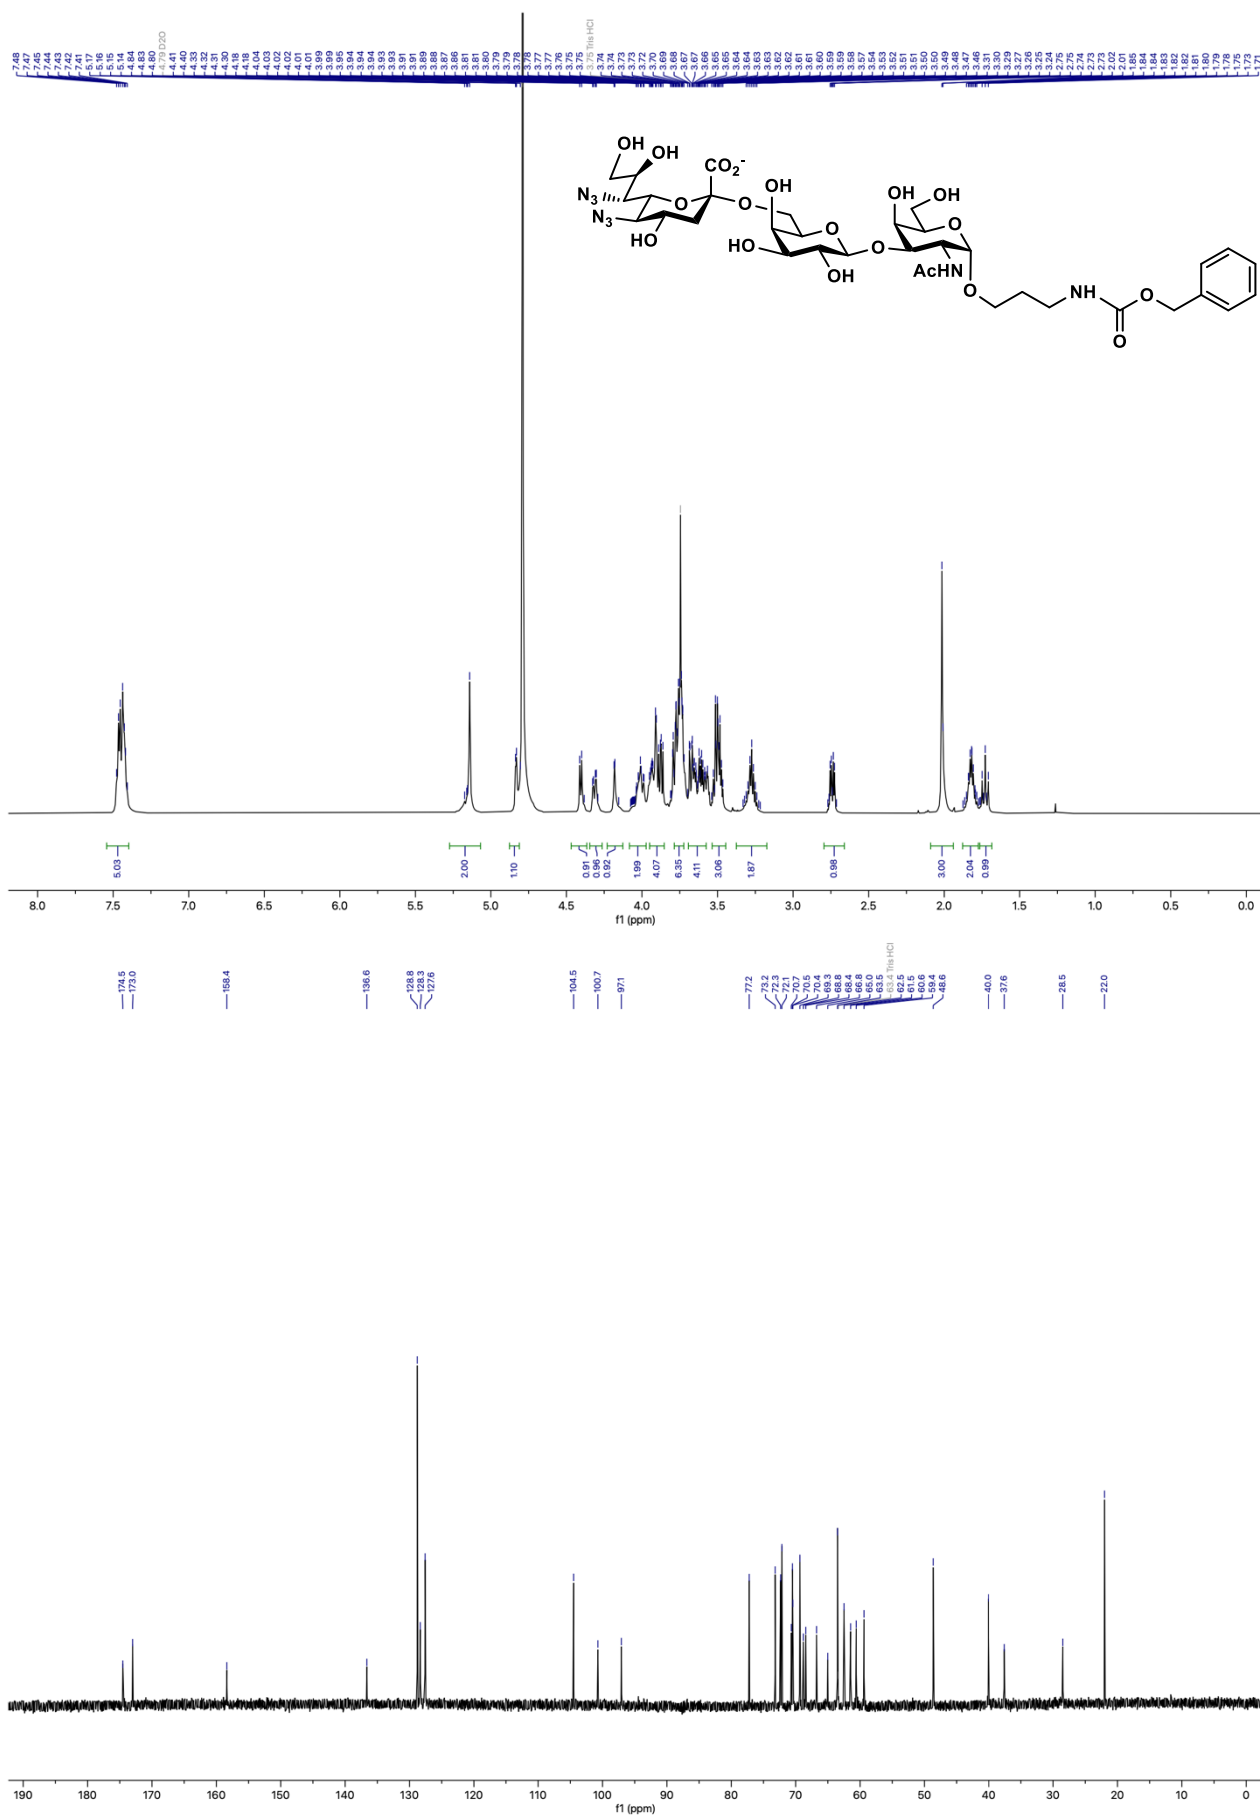

600 MHz  $^1\text{H}$  and 150 MHz  $^{13}\text{C}\{^1\text{H}\}$  NMR spectra of Neu5,7,9triN $_3\alpha$ 2-6Gal $\beta$ 1-3GalNAc $\alpha$ ProNHCBz (**46**) in D $_2$ O

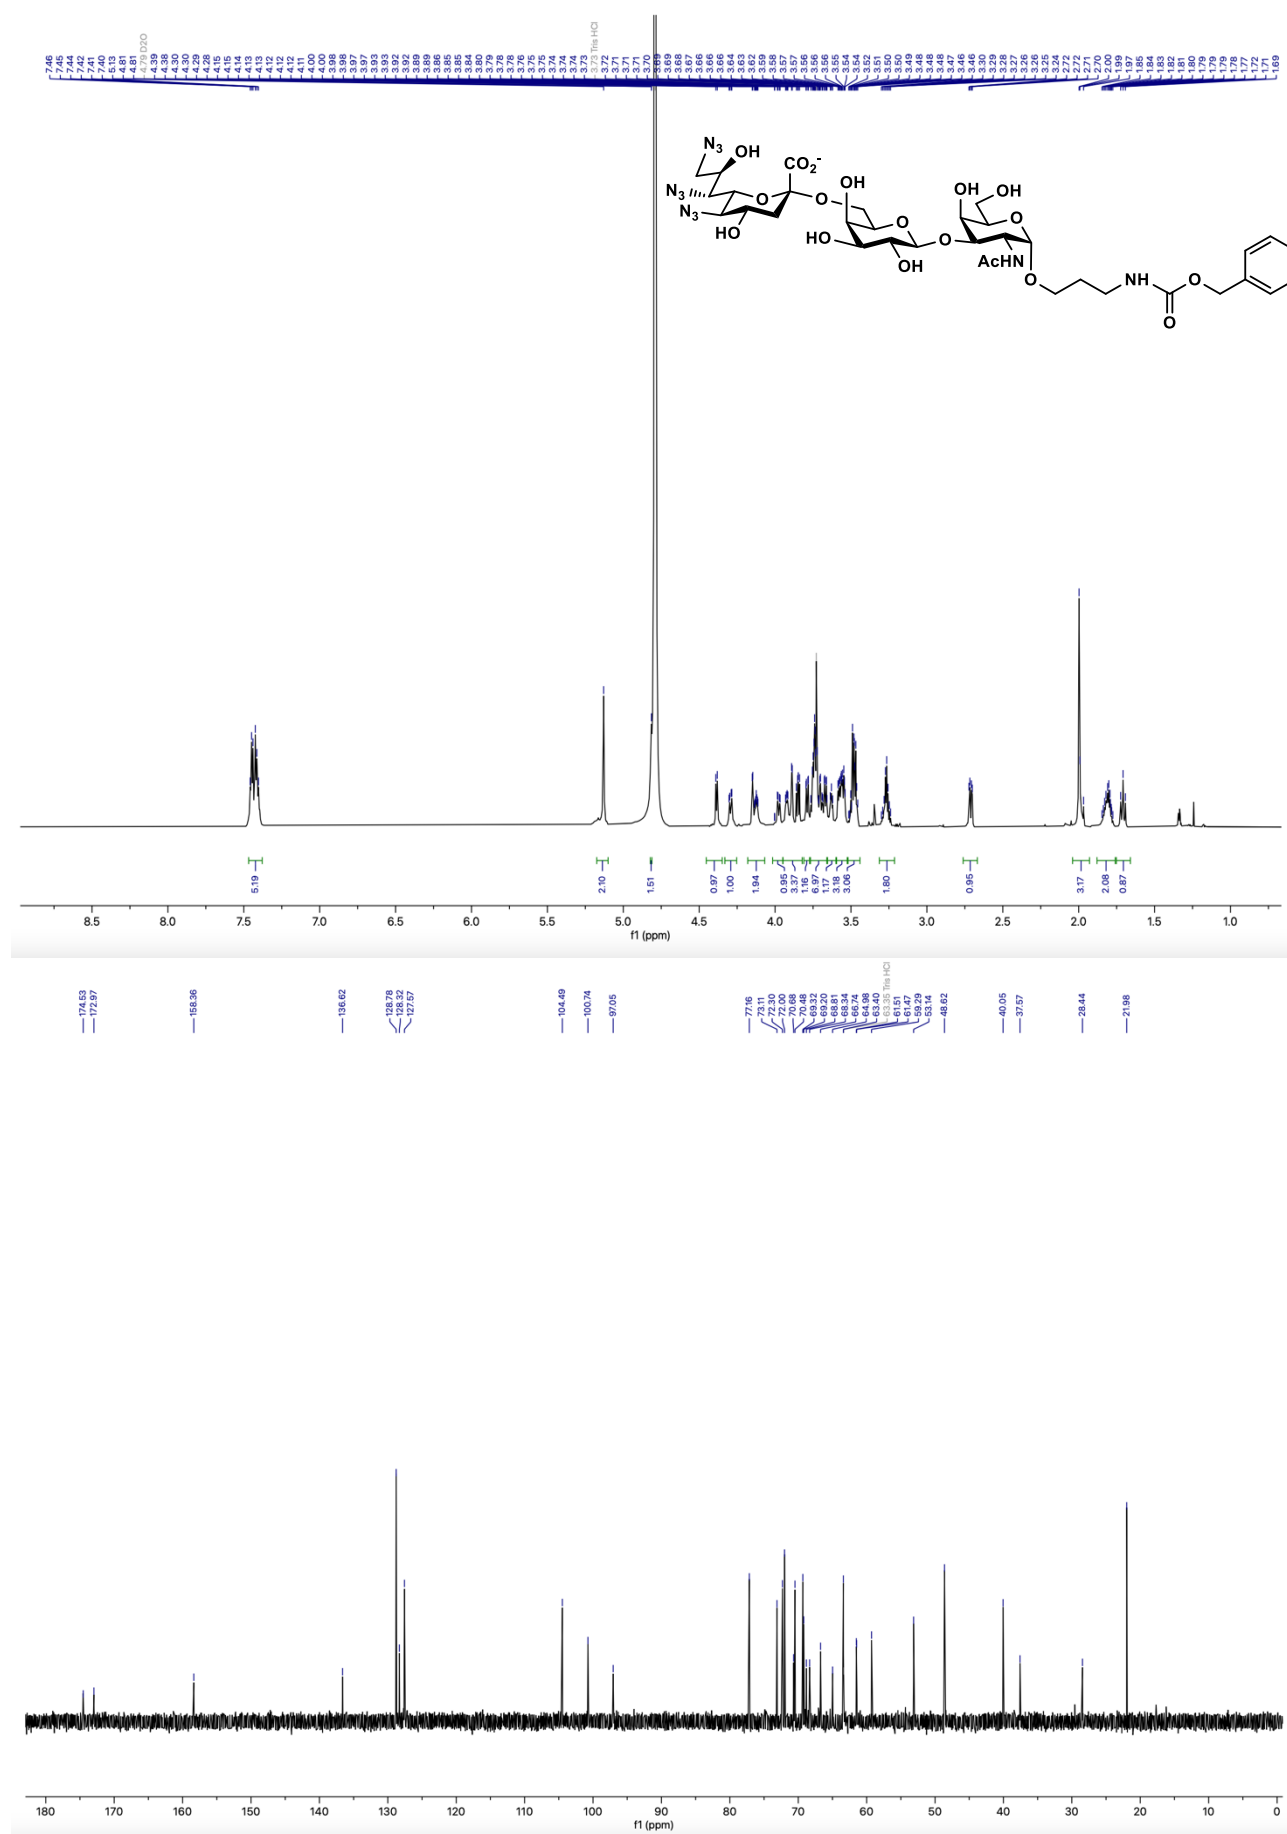

600 MHz  $^1\text{H}$  and 150 MHz  $^{13}\text{C}\{^1\text{H}\}$  NMR spectra of Neu5,7diN<sub>3</sub>α2-3Galβ1-3GlcNAcβProNHCbz (47) in D<sub>2</sub>O

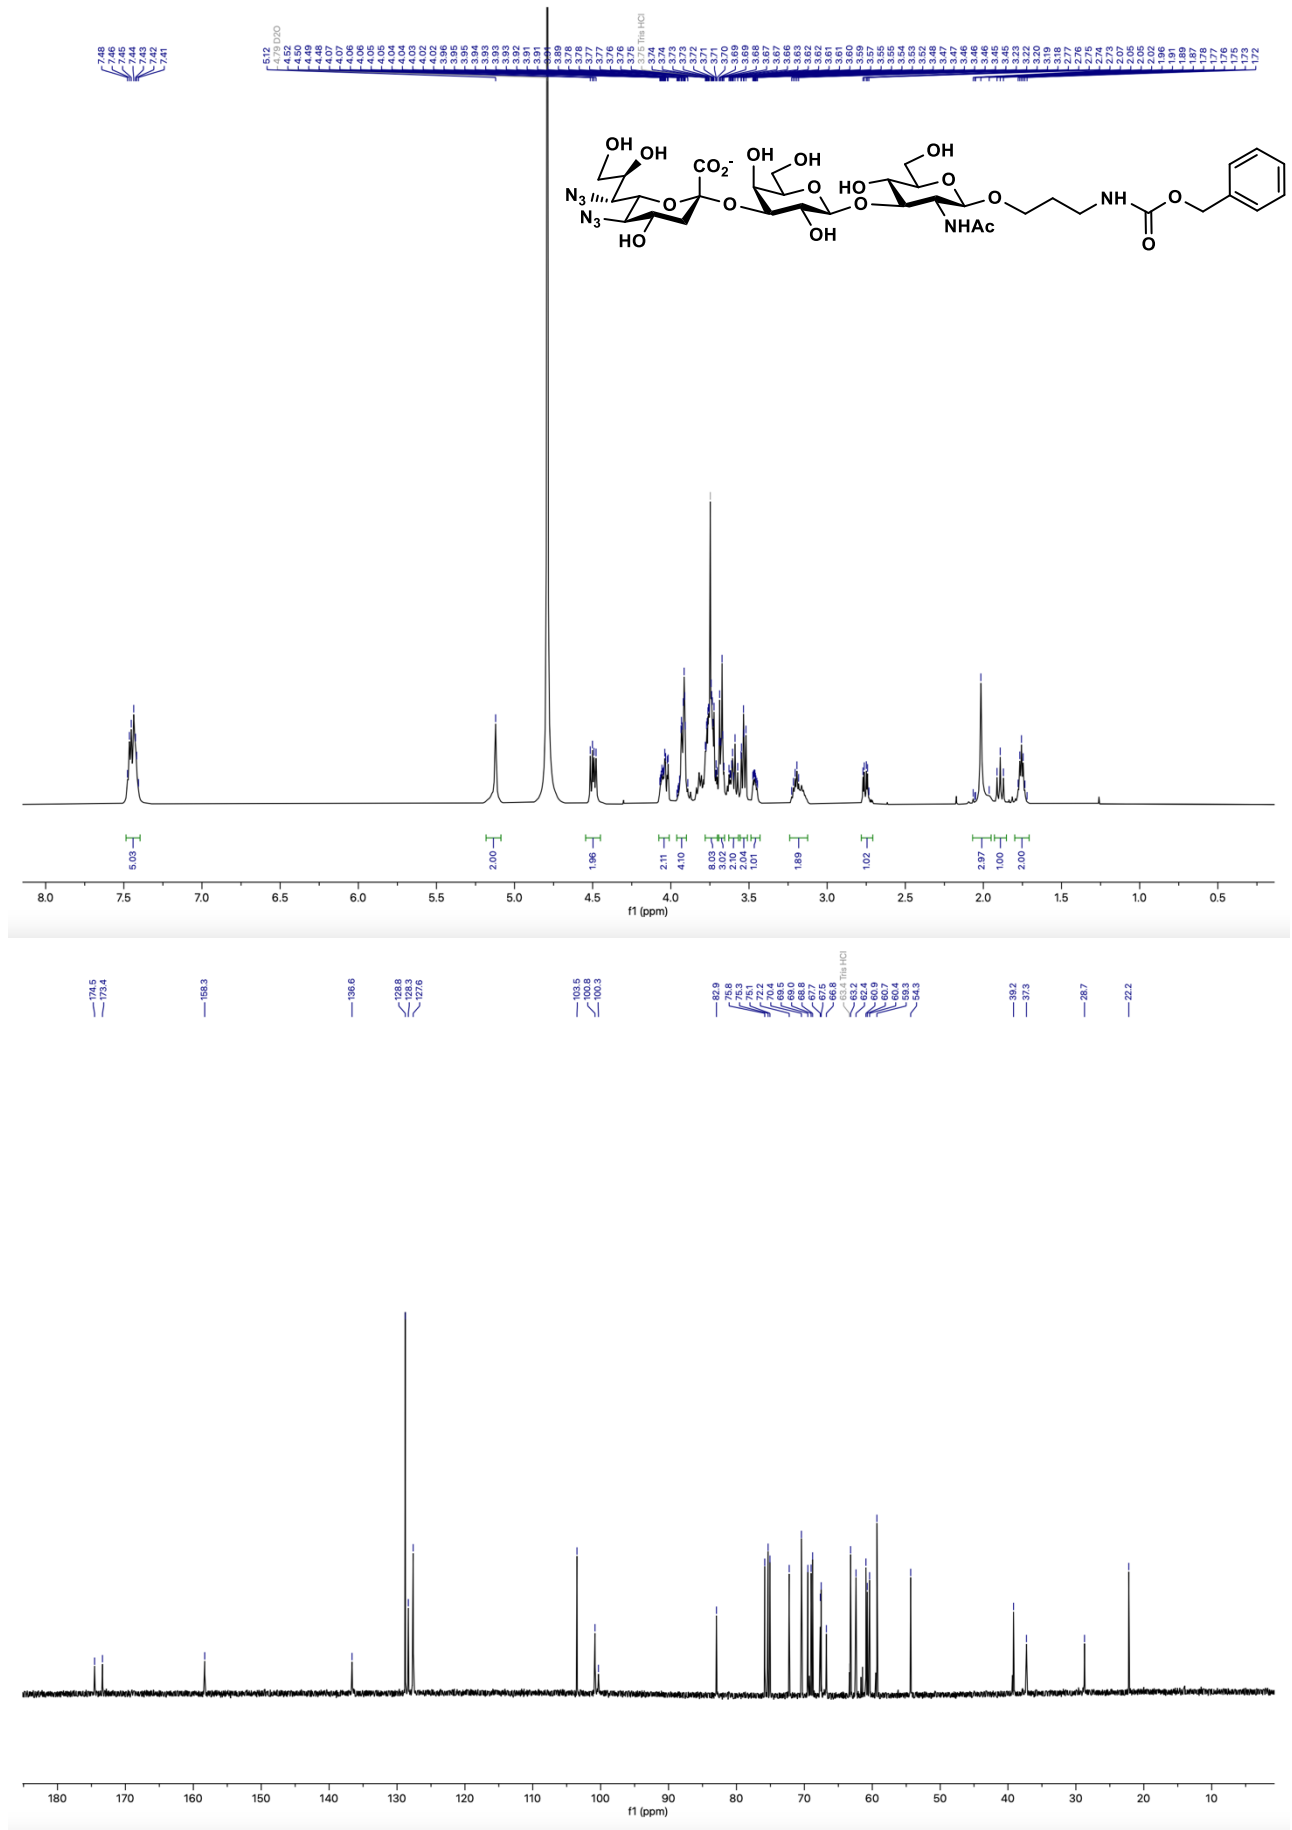

800 MHz  $^1\text{H}$  and 200 MHz  $^{13}\text{C}\{^1\text{H}\}$  NMR spectra of Neu5,7,9triN<sub>3</sub> $\alpha$ 2-3Gal $\beta$ 1-3GlcNAc $\beta$ ProNHCbz (**48**) in D<sub>2</sub>O

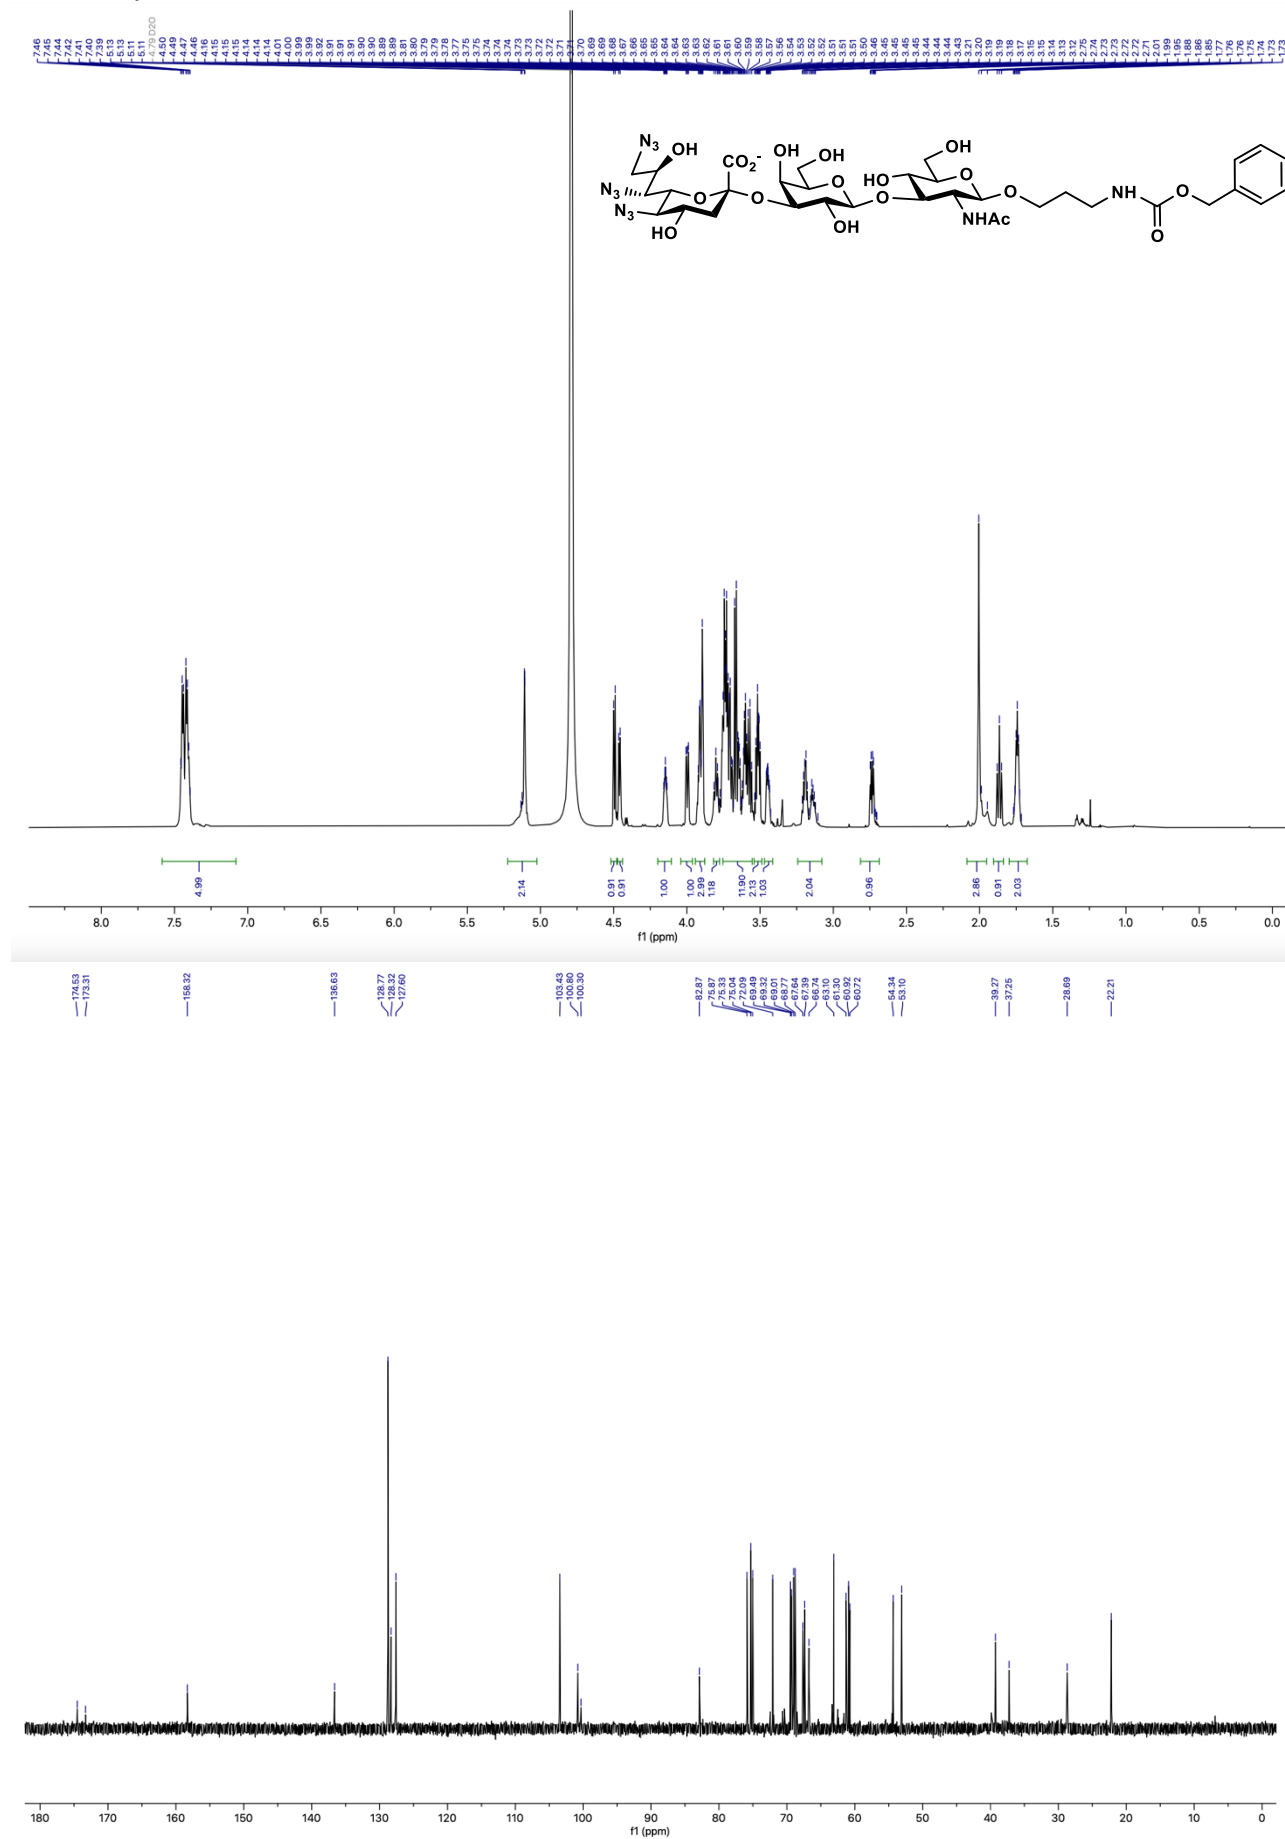

600 MHz  $^1\text{H}$  and 150 MHz  $^{13}\text{C}\{^1\text{H}\}$  NMR spectra of Neu5,7diN<sub>3</sub>α2–6Galβ1–3GlcNAcβProNHCBz (**49**) in D<sub>2</sub>O

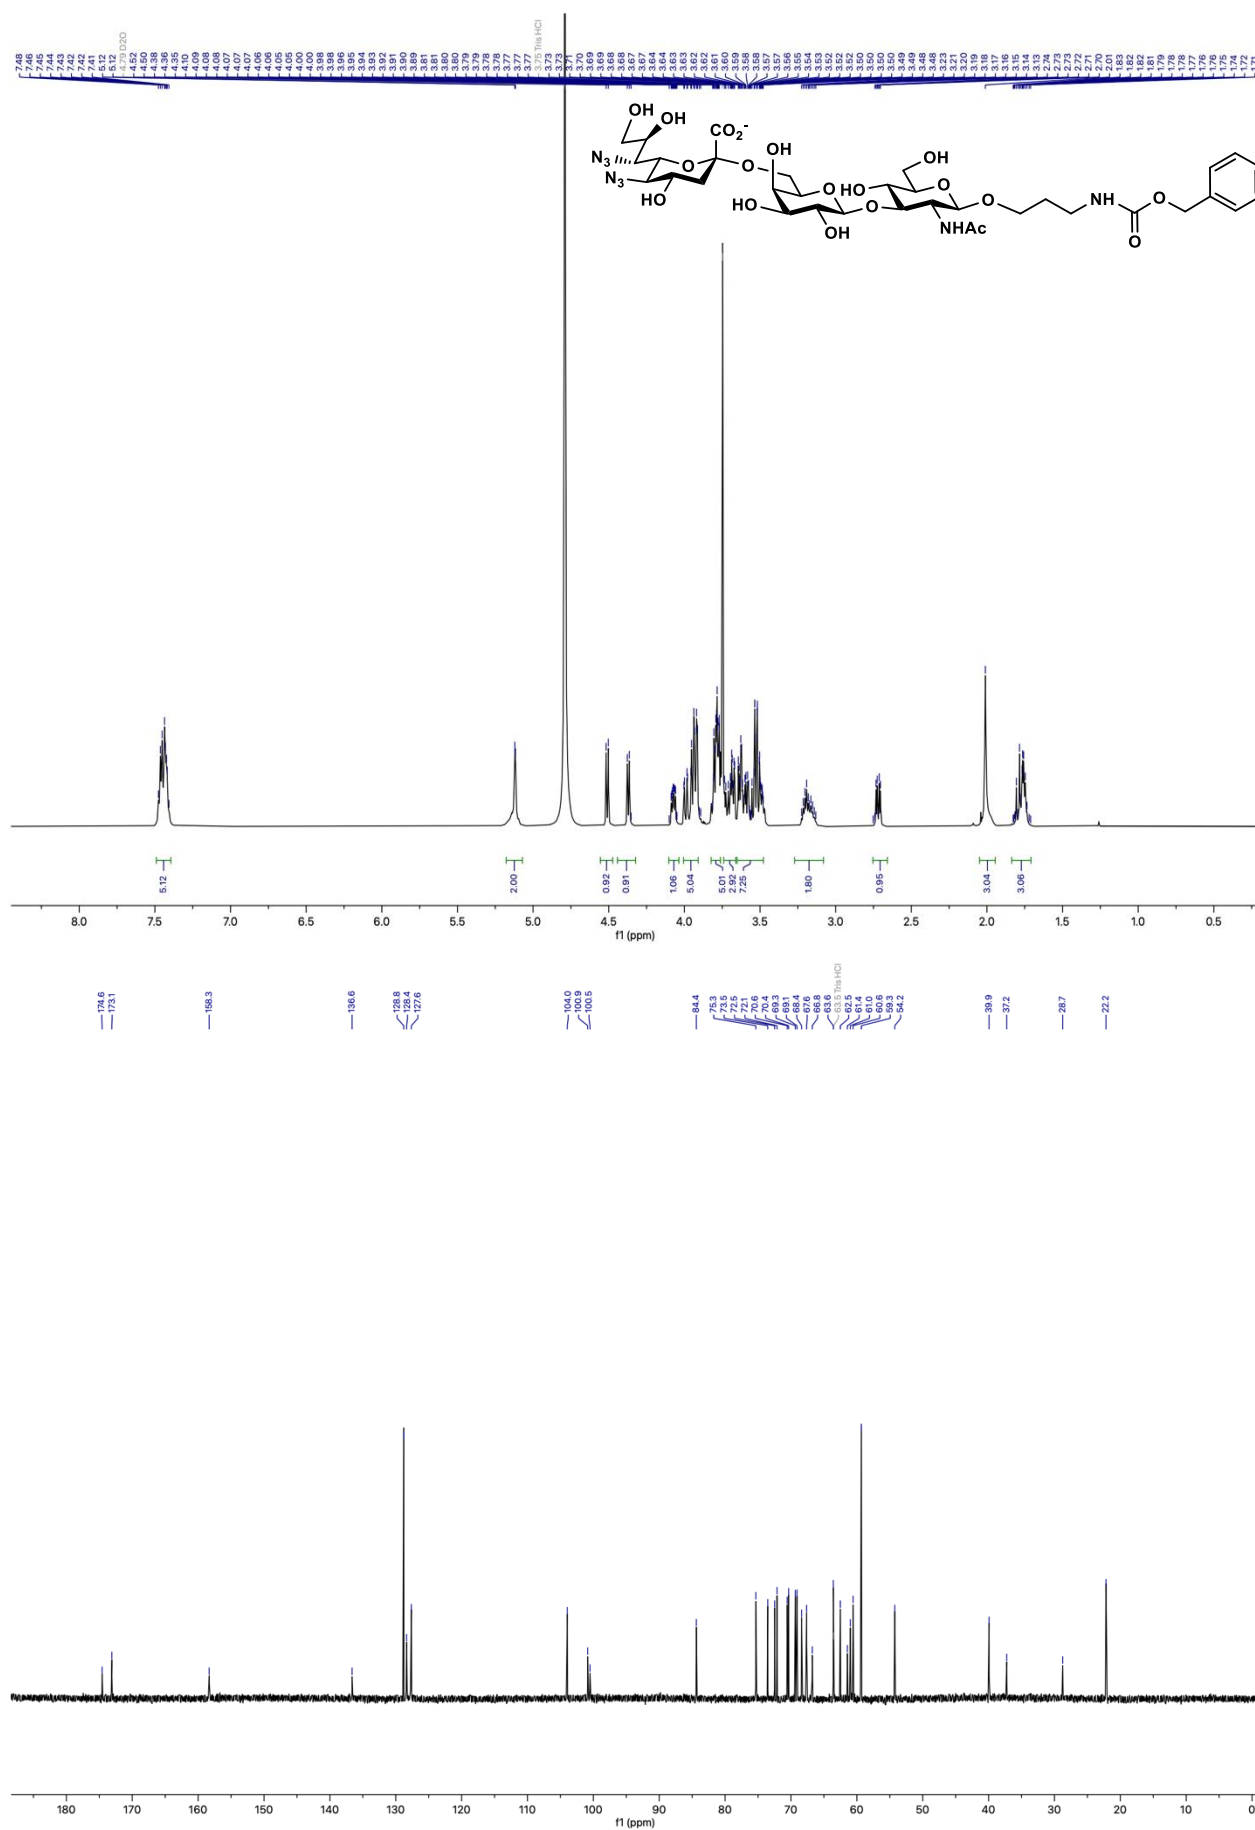

600 MHz <sup>1</sup>H and 150 MHz <sup>13</sup>C{<sup>1</sup>H} NMR spectra of Neu5,7,9triN<sub>3</sub>α2-6Galβ1-3GlcNAcβProNHCBz (**50**) in D<sub>2</sub>O

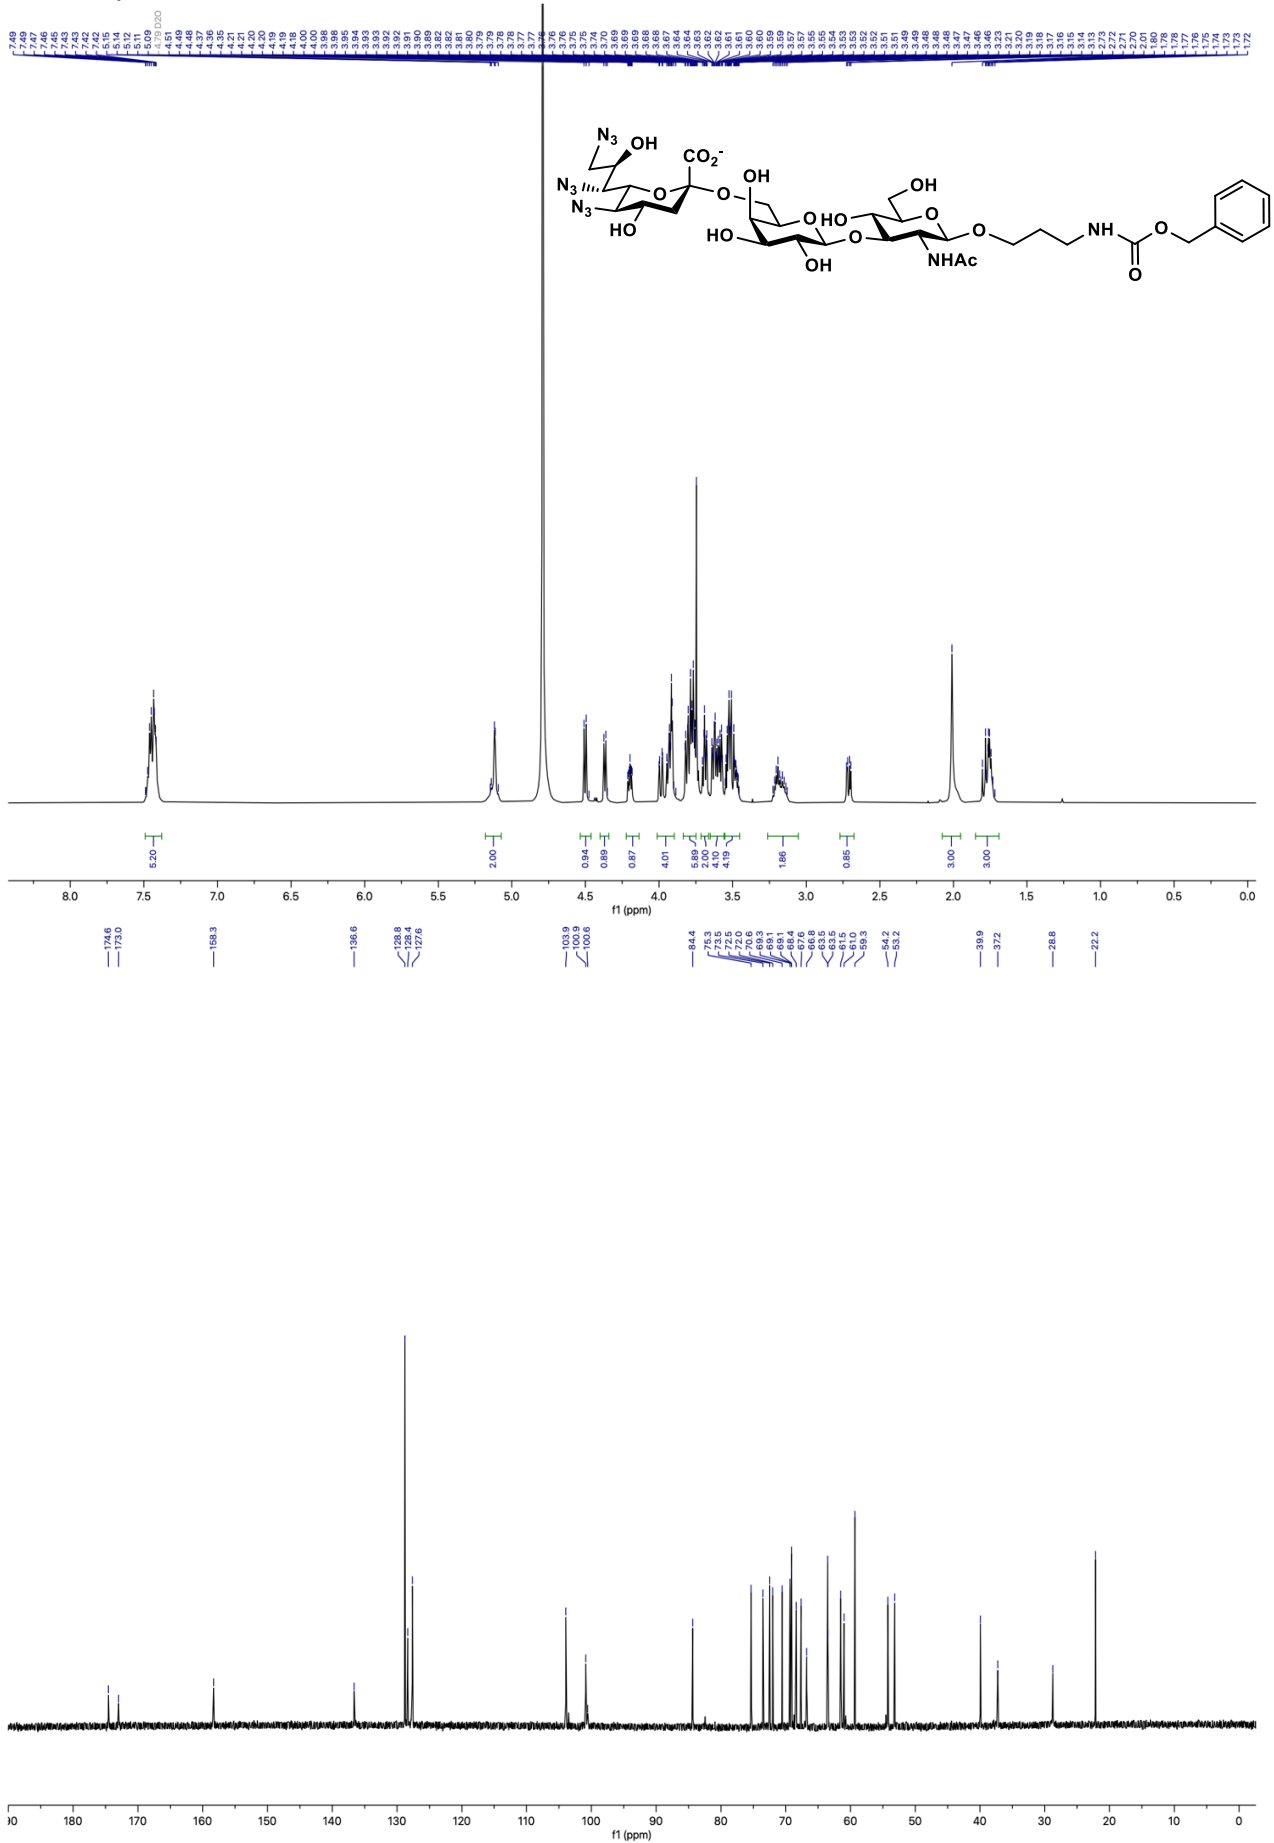



600 MHz  $^1\text{H}$  and 150 MHz  $^{13}\text{C}\{^1\text{H}\}$  NMR spectra of Neu5,7,9triN<sub>3</sub> $\alpha$ 2-3Gal $\beta$ 1-3GlcNAc $\alpha$ ProNHCbz (**52**) in D<sub>2</sub>O

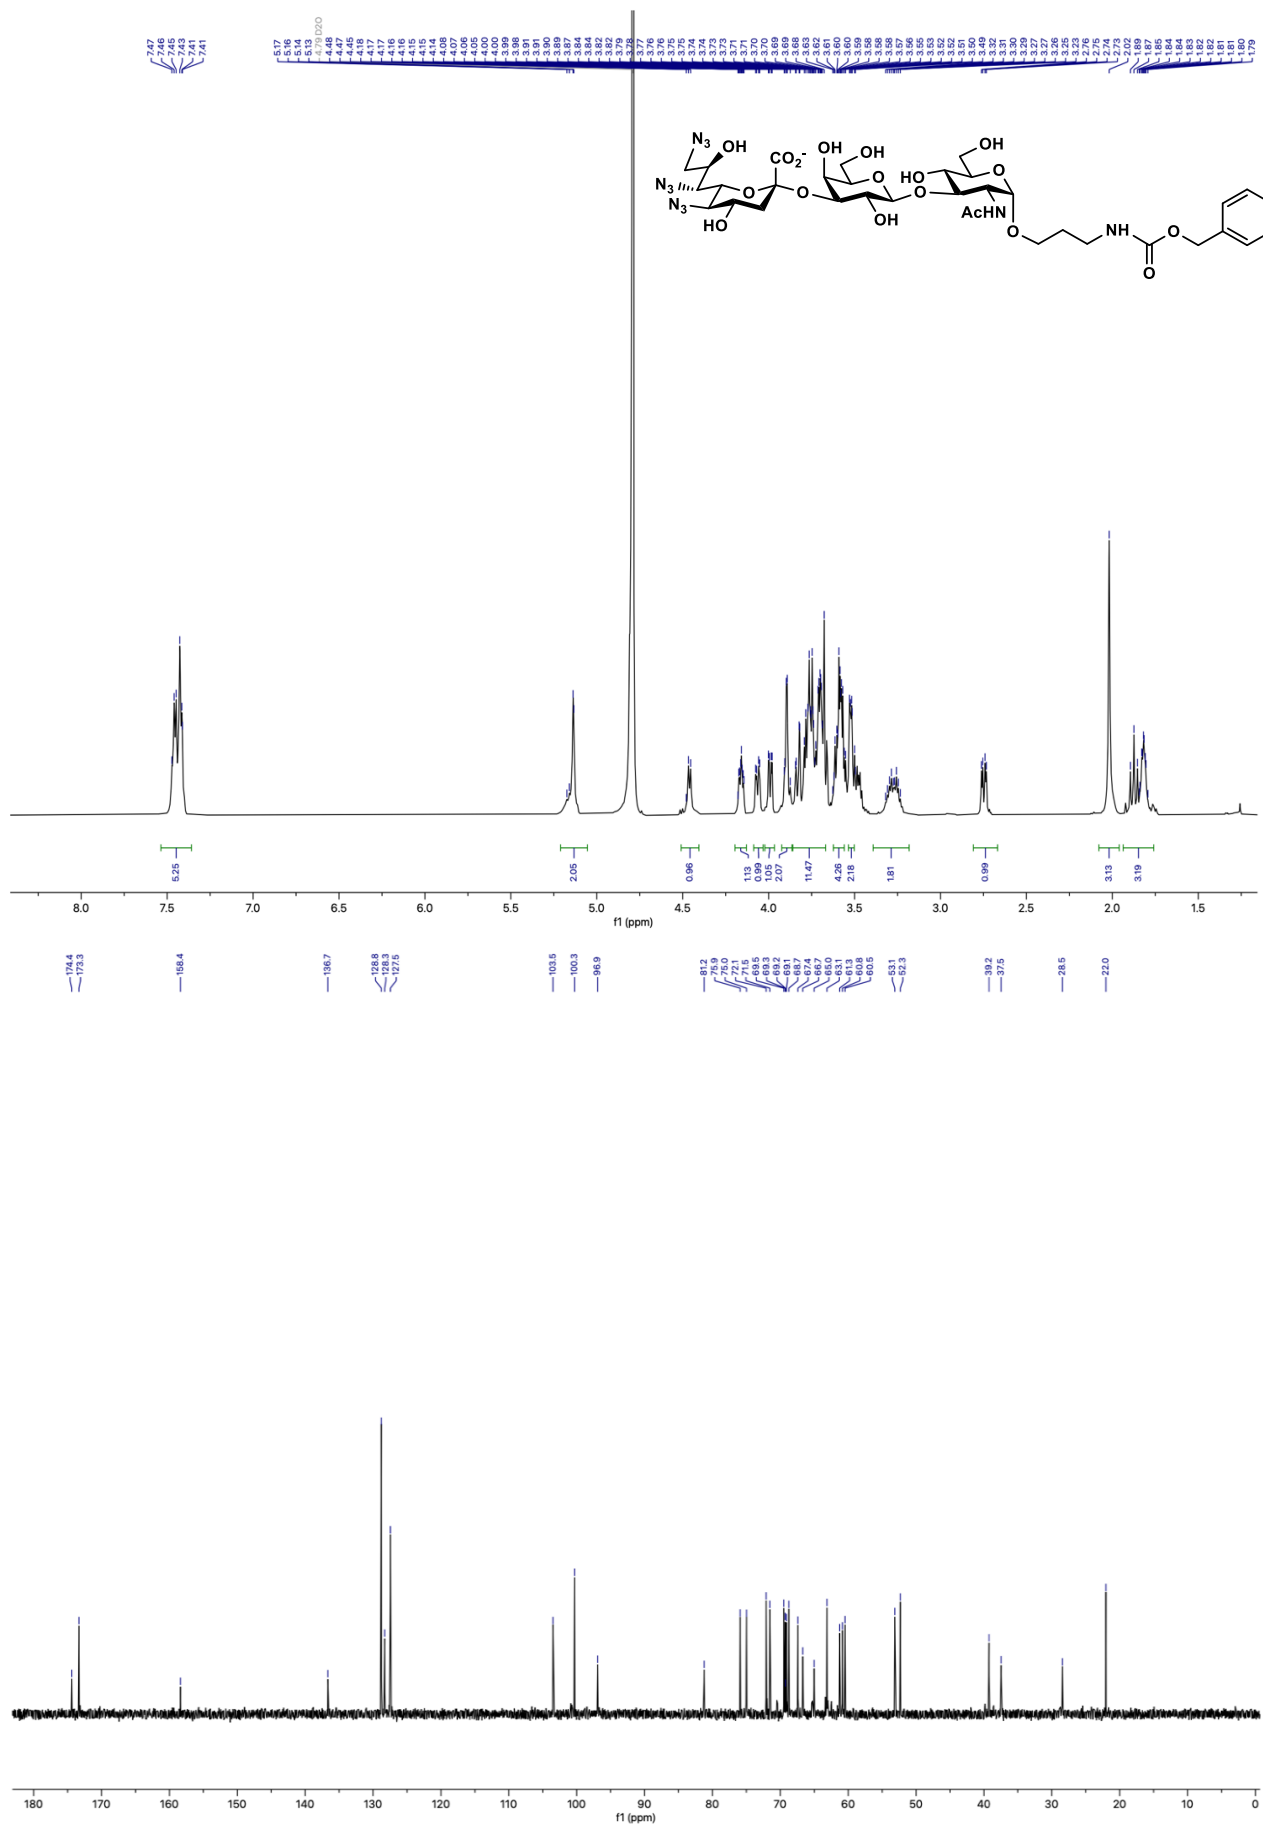



600 MHz  $^1\text{H}$  and 150 MHz  $^{13}\text{C}\{^1\text{H}\}$  NMR spectra of Neu5,7diN $_3\alpha$ 2-6Gal $\beta$ 1-3GlcNAc $\alpha$ ProNHCBz (**53**) in D $_2$ O

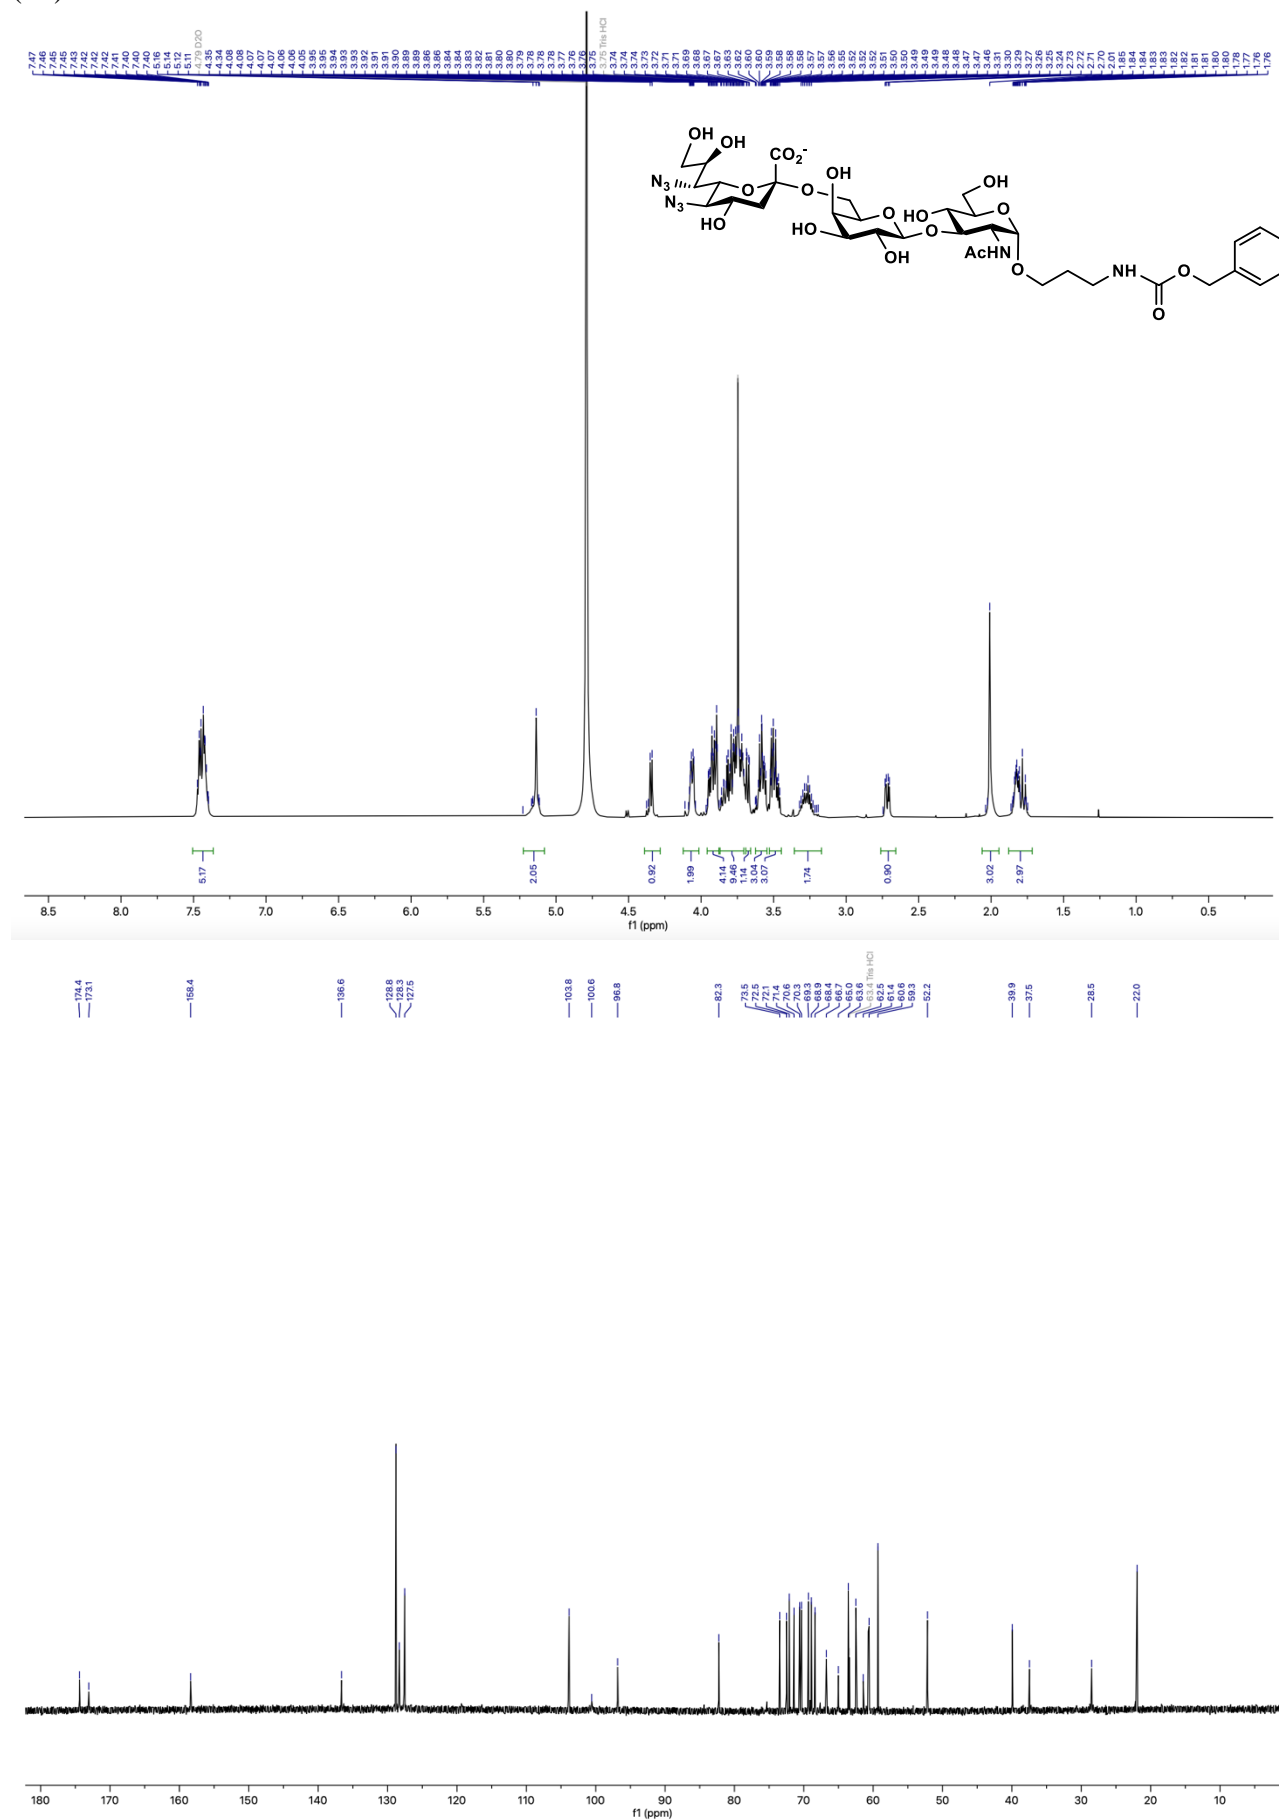

600 MHz  $^1\text{H}$  and 150 MHz  $^{13}\text{C}\{^1\text{H}\}$  NMR spectra of Neu5,7,9triN $_3\alpha$ 2-6Gal $\beta$ 1-3GlcNAc $\alpha$ ProNHCBz (**54**) in D $_2$ O

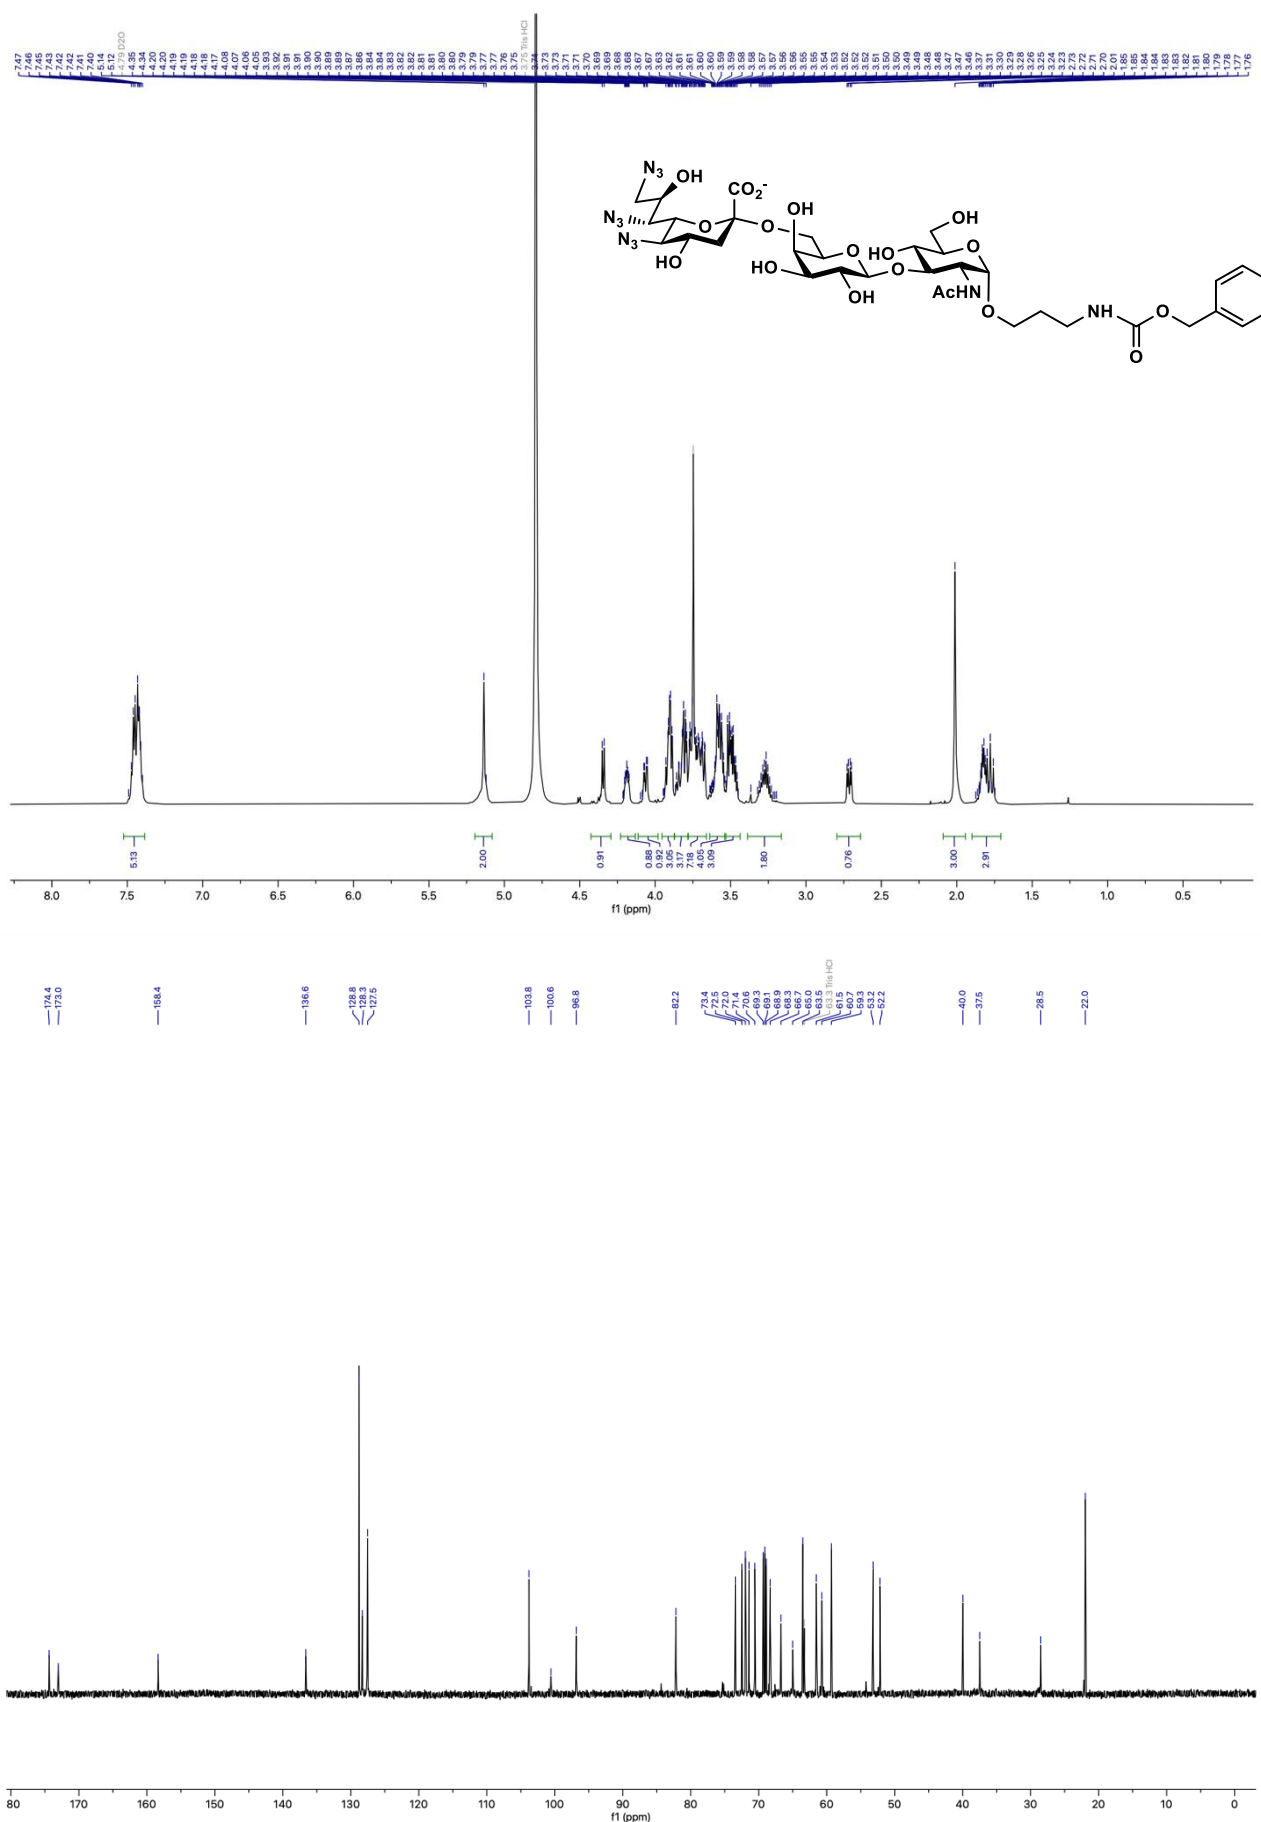

600 MHz  $^1\text{H}$  and 150 MHz  $^{13}\text{C}\{^1\text{H}\}$  NMR spectra of Neu5,7diN<sub>3</sub>α2-6GalNAcαProNHCBz (**55**) in D<sub>2</sub>O

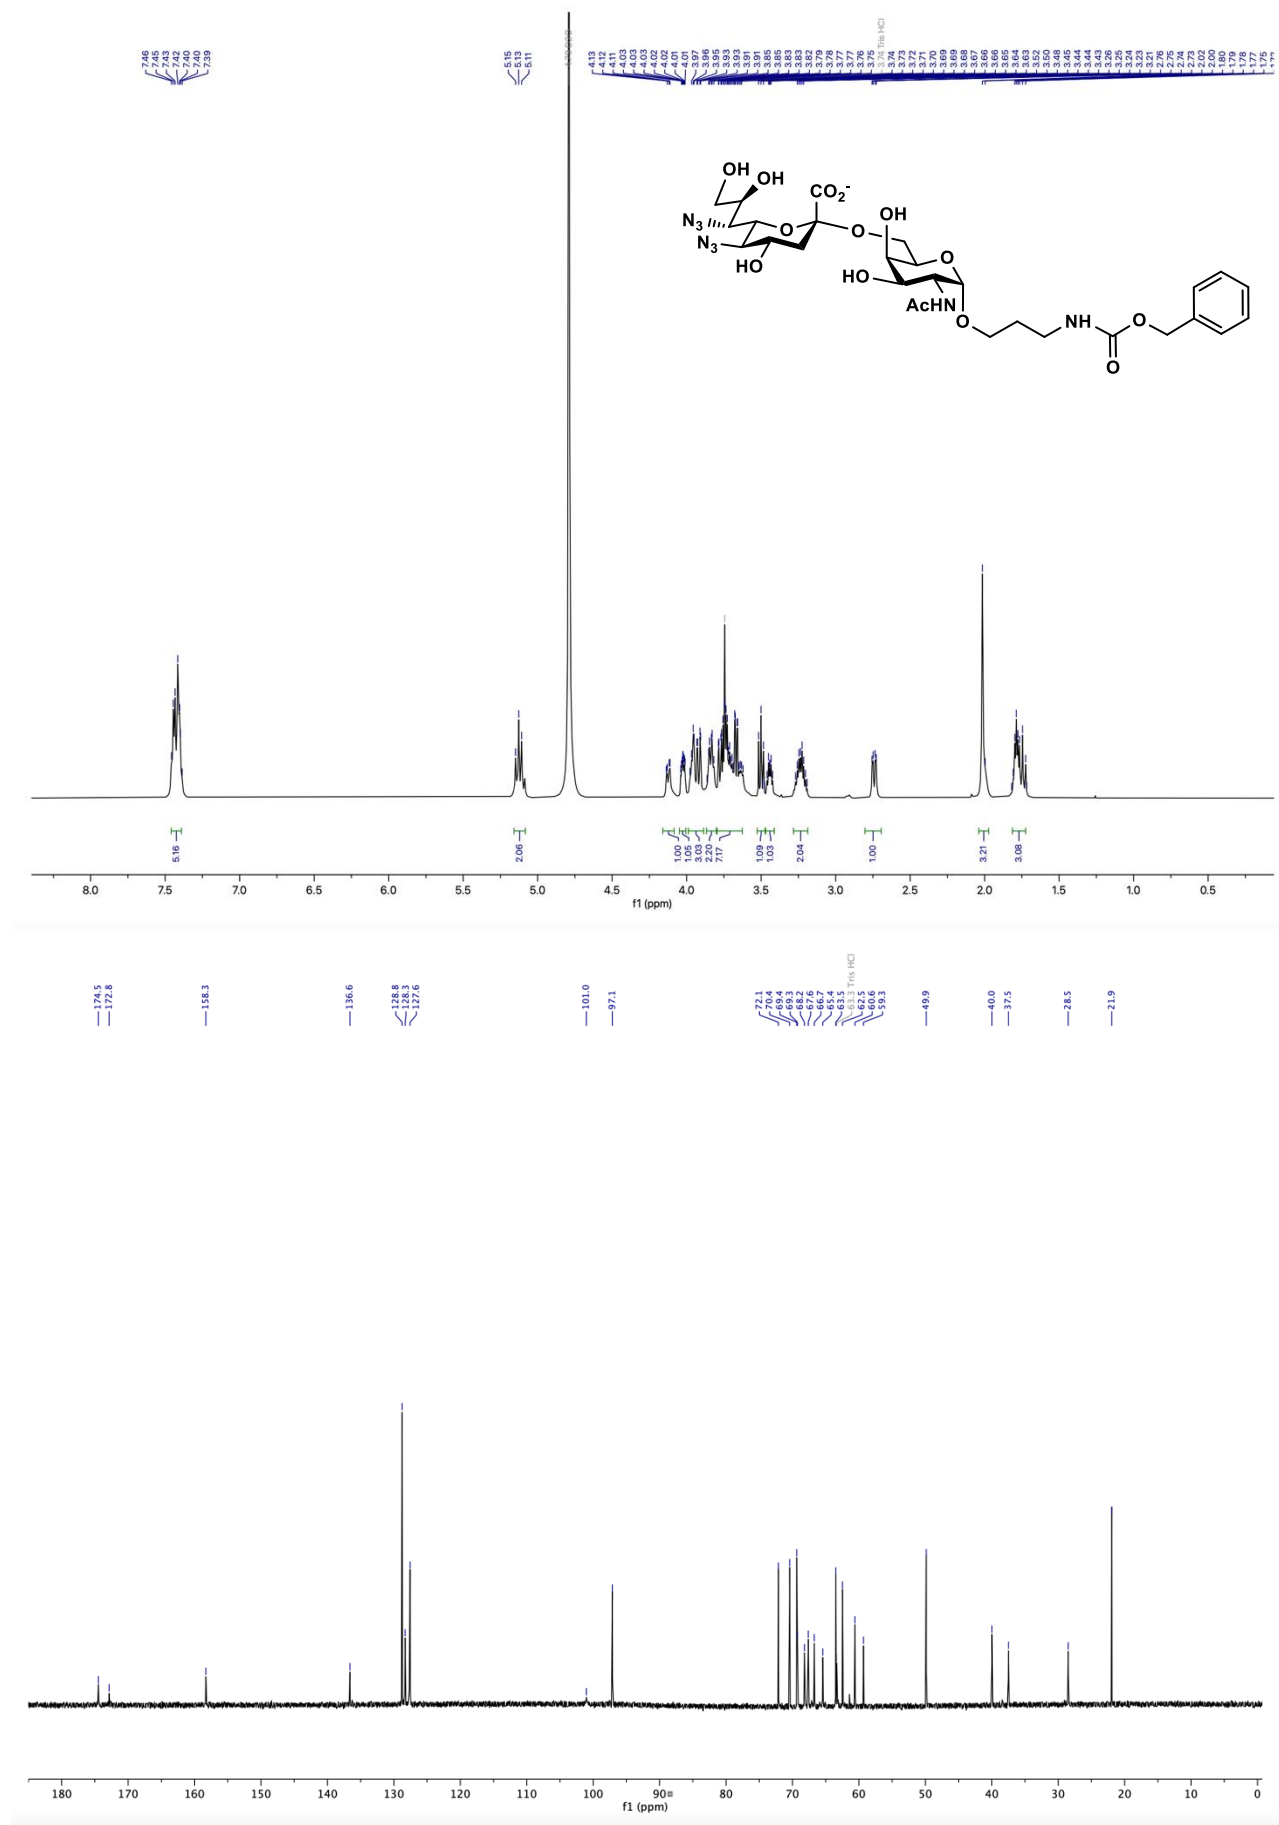

800 MHz  $^1\text{H}$  and 200 MHz  $^{13}\text{C}\{^1\text{H}\}$  NMR spectra of Neu5,7,9triN $_3\alpha$ 2-6GalNAc $\alpha$ ProNHCBz (**56**) in D $_2$ O

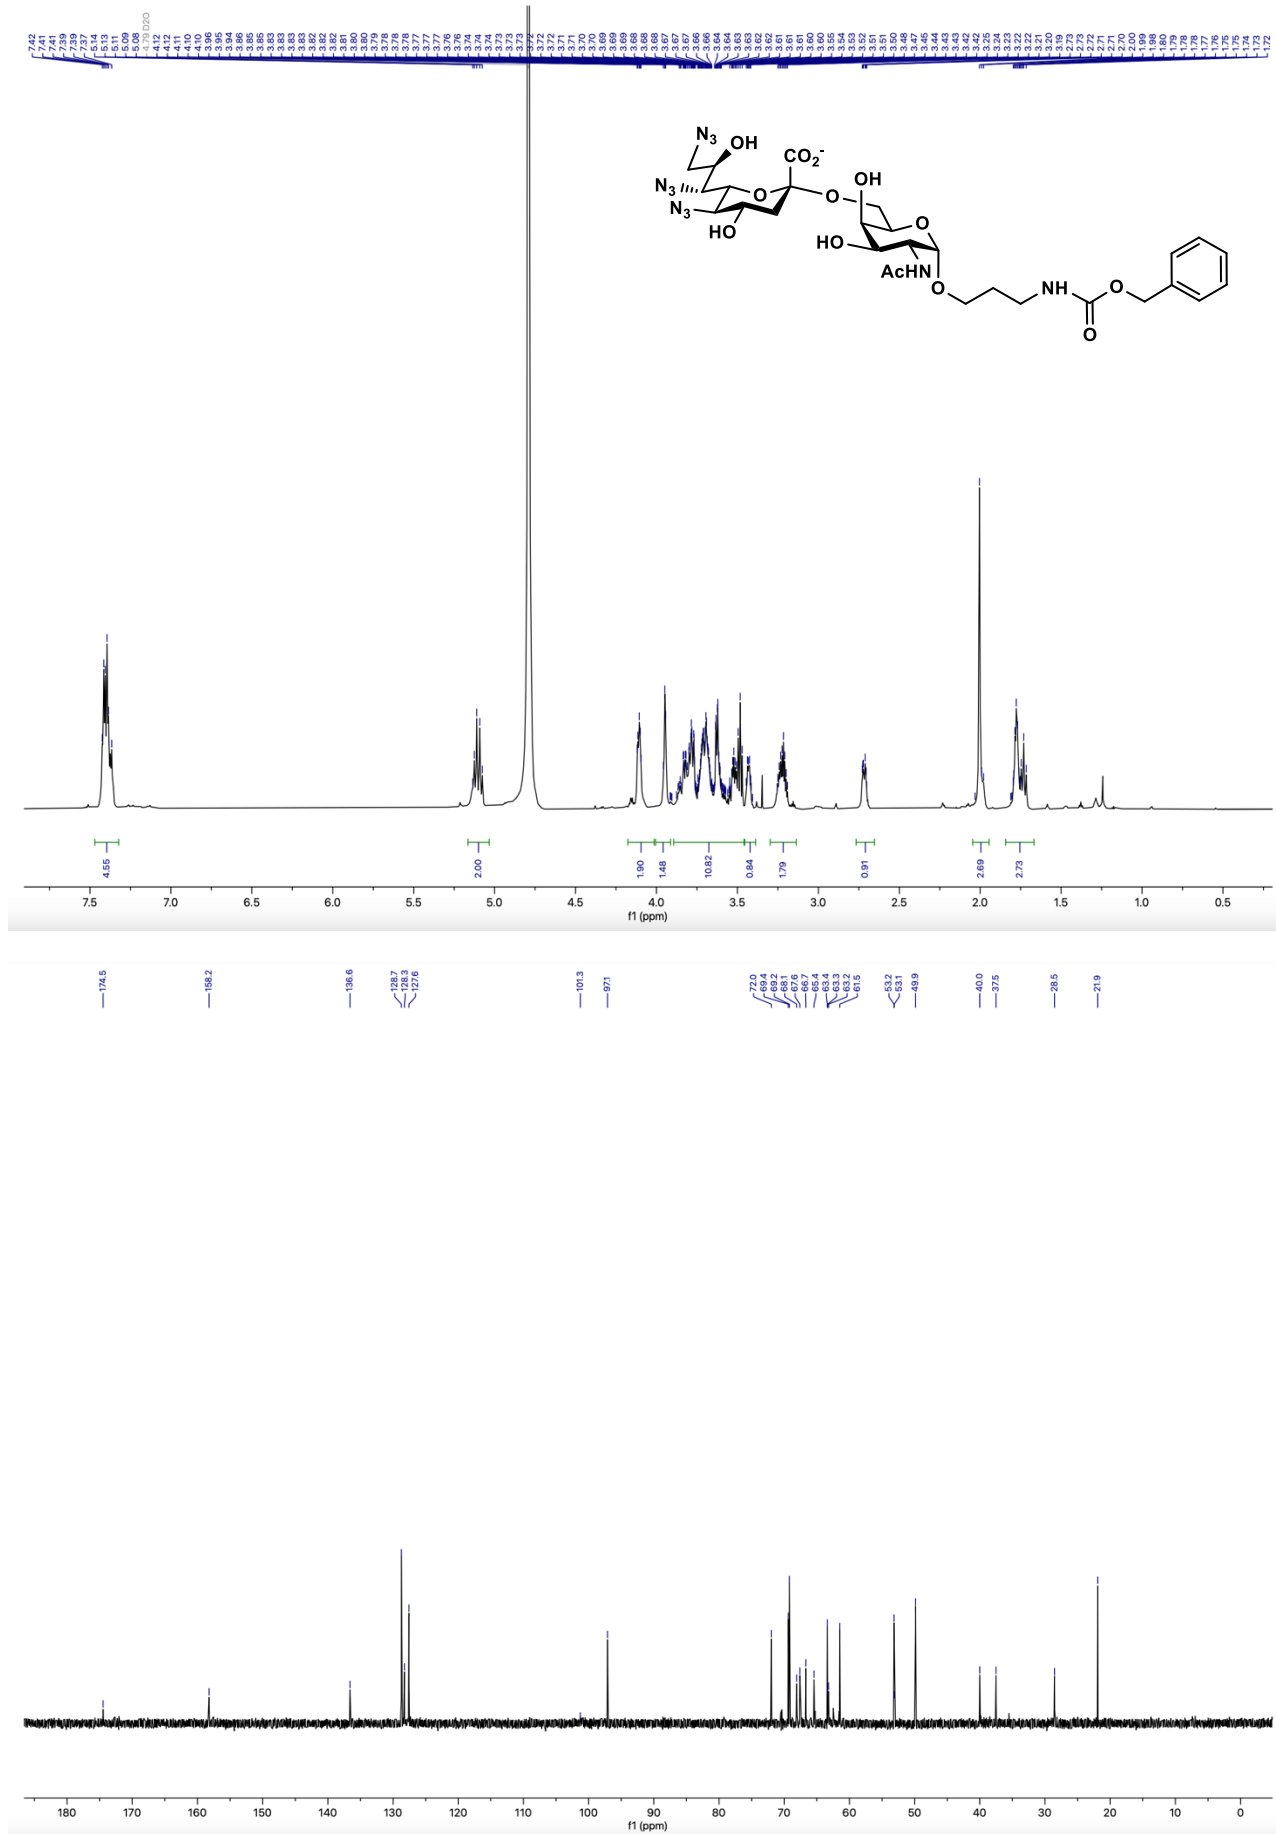

800 MHz  $^1\text{H}$  and 200 MHz  $^{13}\text{C}\{^1\text{H}\}$  NMR spectra of Neu5Ac7NAc $\alpha$ 2-3Lac $\beta$ ProNHCBz (**57**) in  $\text{D}_2\text{O}$

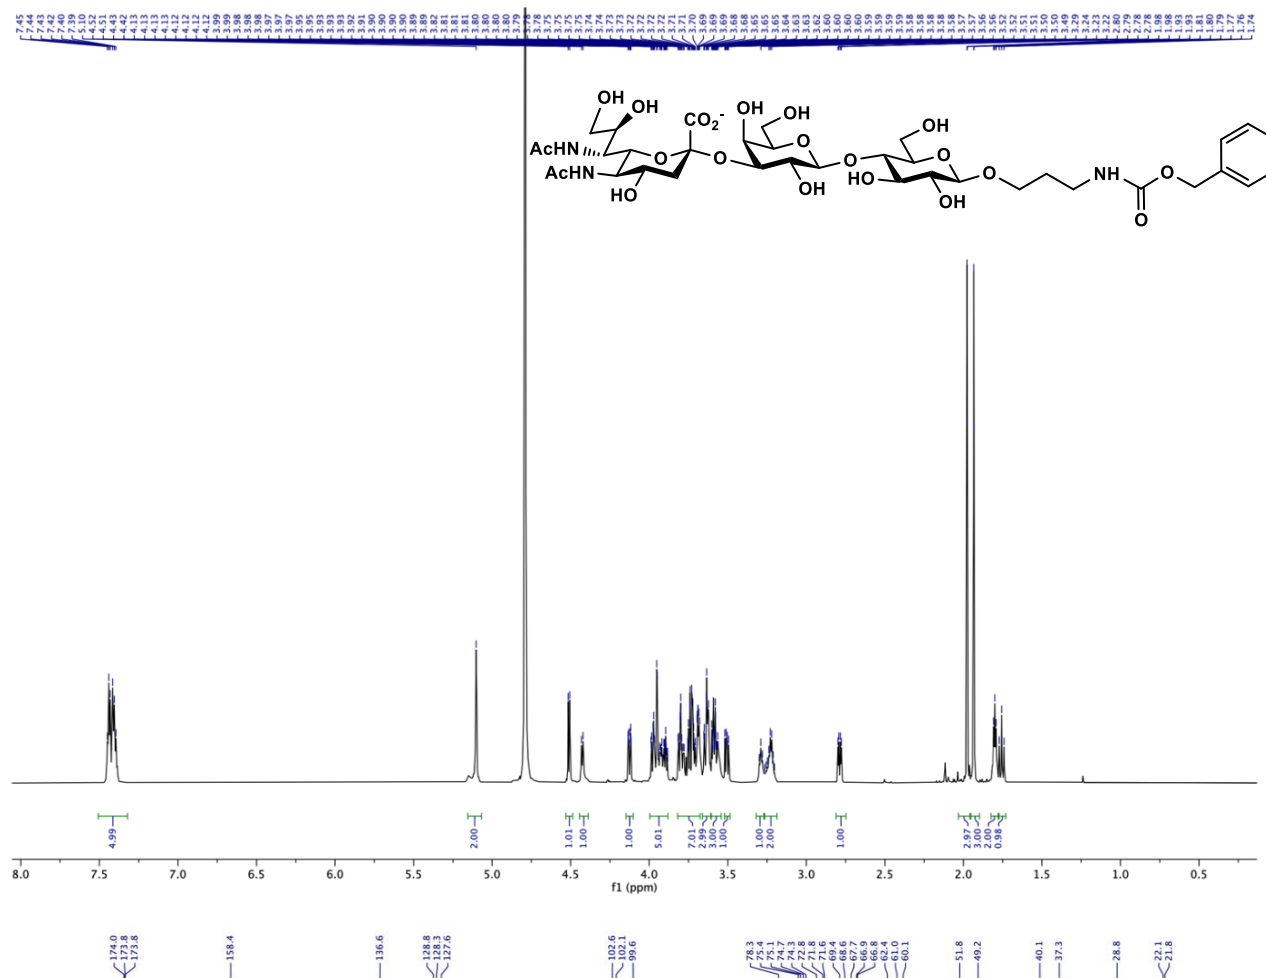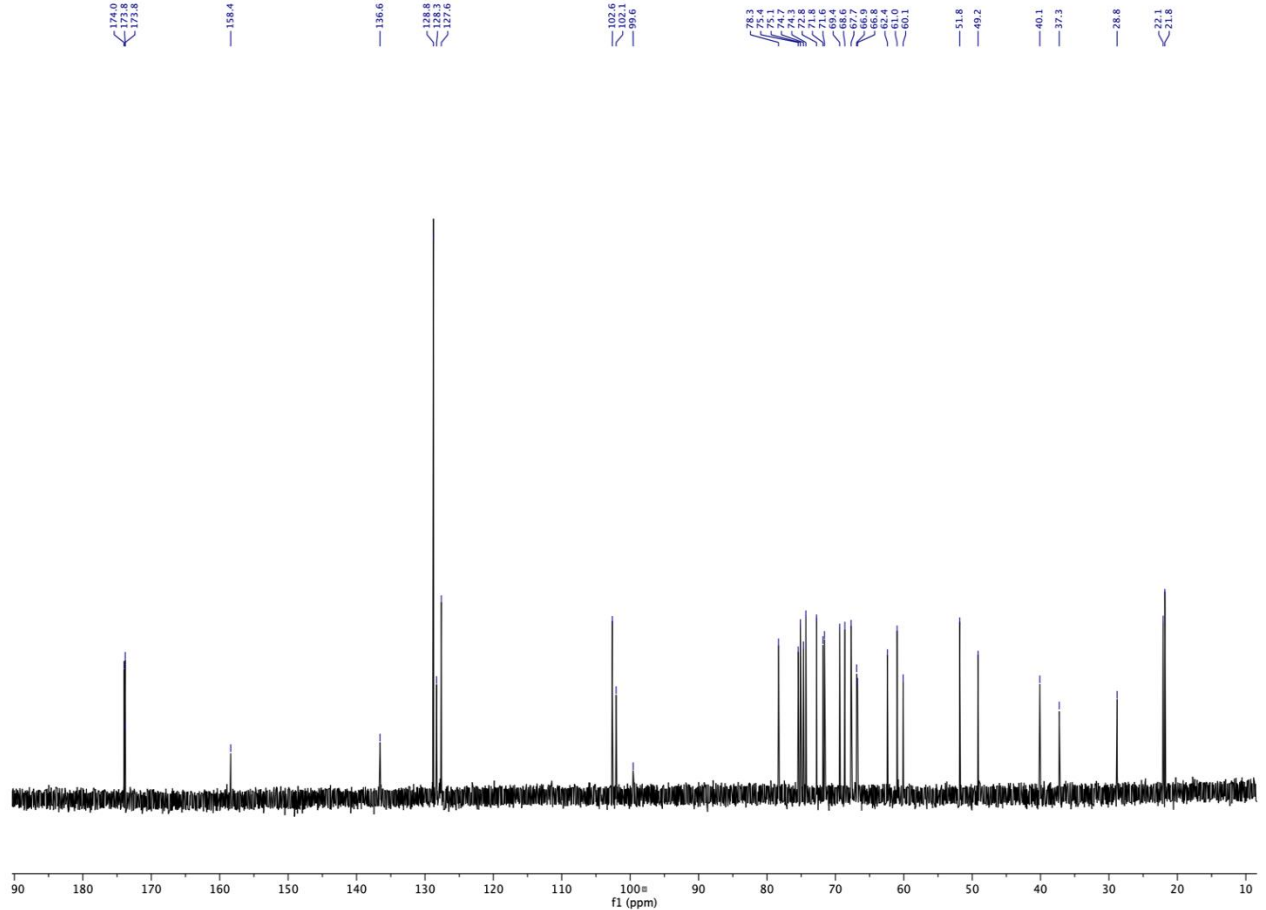

600 MHz  $^1\text{H}$  and 150 MHz  $^{13}\text{C}\{^1\text{H}\}$  NMR spectra of Neu5Ac7,9diNAc $\alpha$ 2-3Lac $\beta$ ProNHCbz (**58**) in  $\text{D}_2\text{O}$

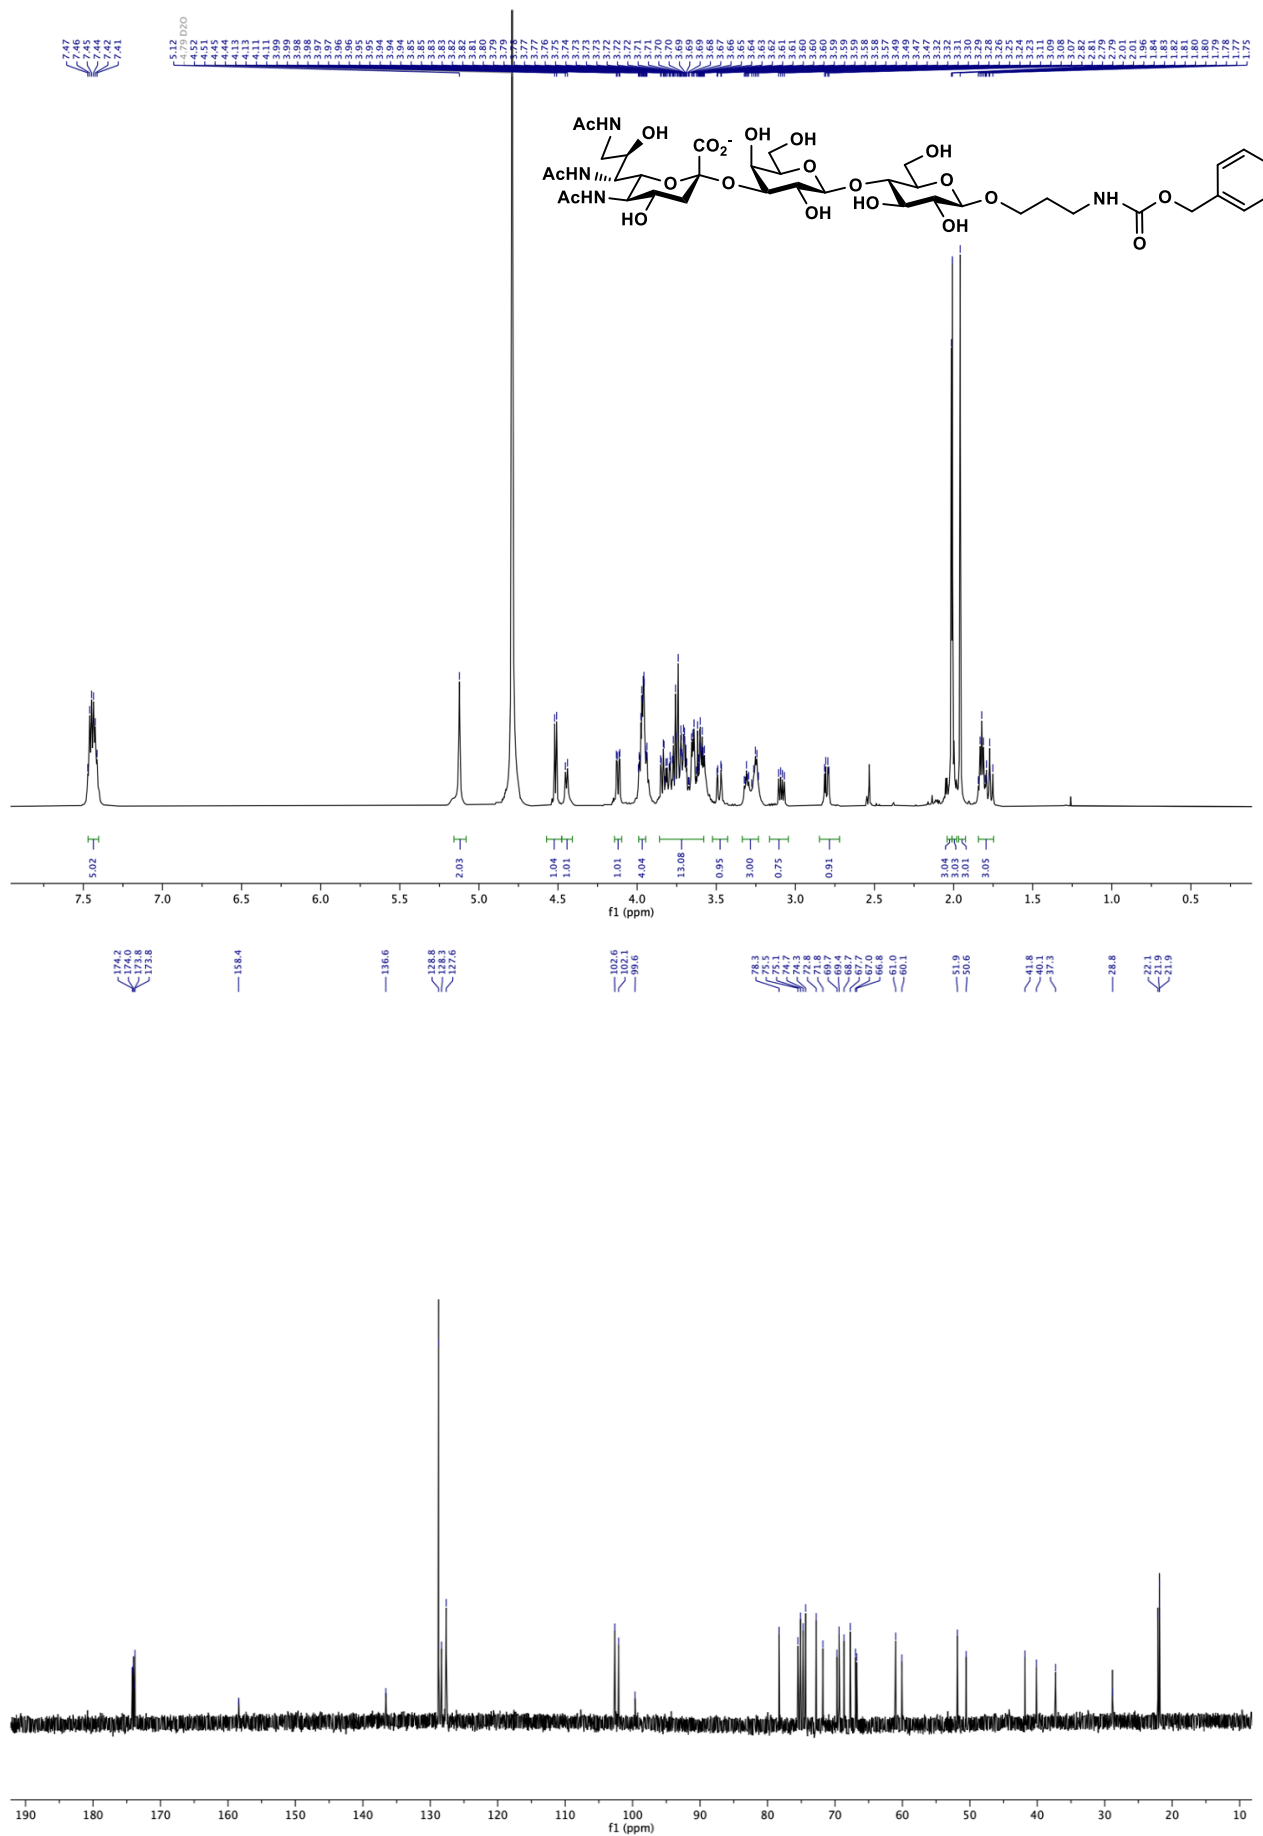

800 MHz  $^1\text{H}$  and 200 MHz  $^{13}\text{C}\{^1\text{H}\}$  NMR spectra of Neu5Ac7NAc $\alpha$ 2-6Lac $\beta$ ProNHCbz (**59**) in  $\text{D}_2\text{O}$

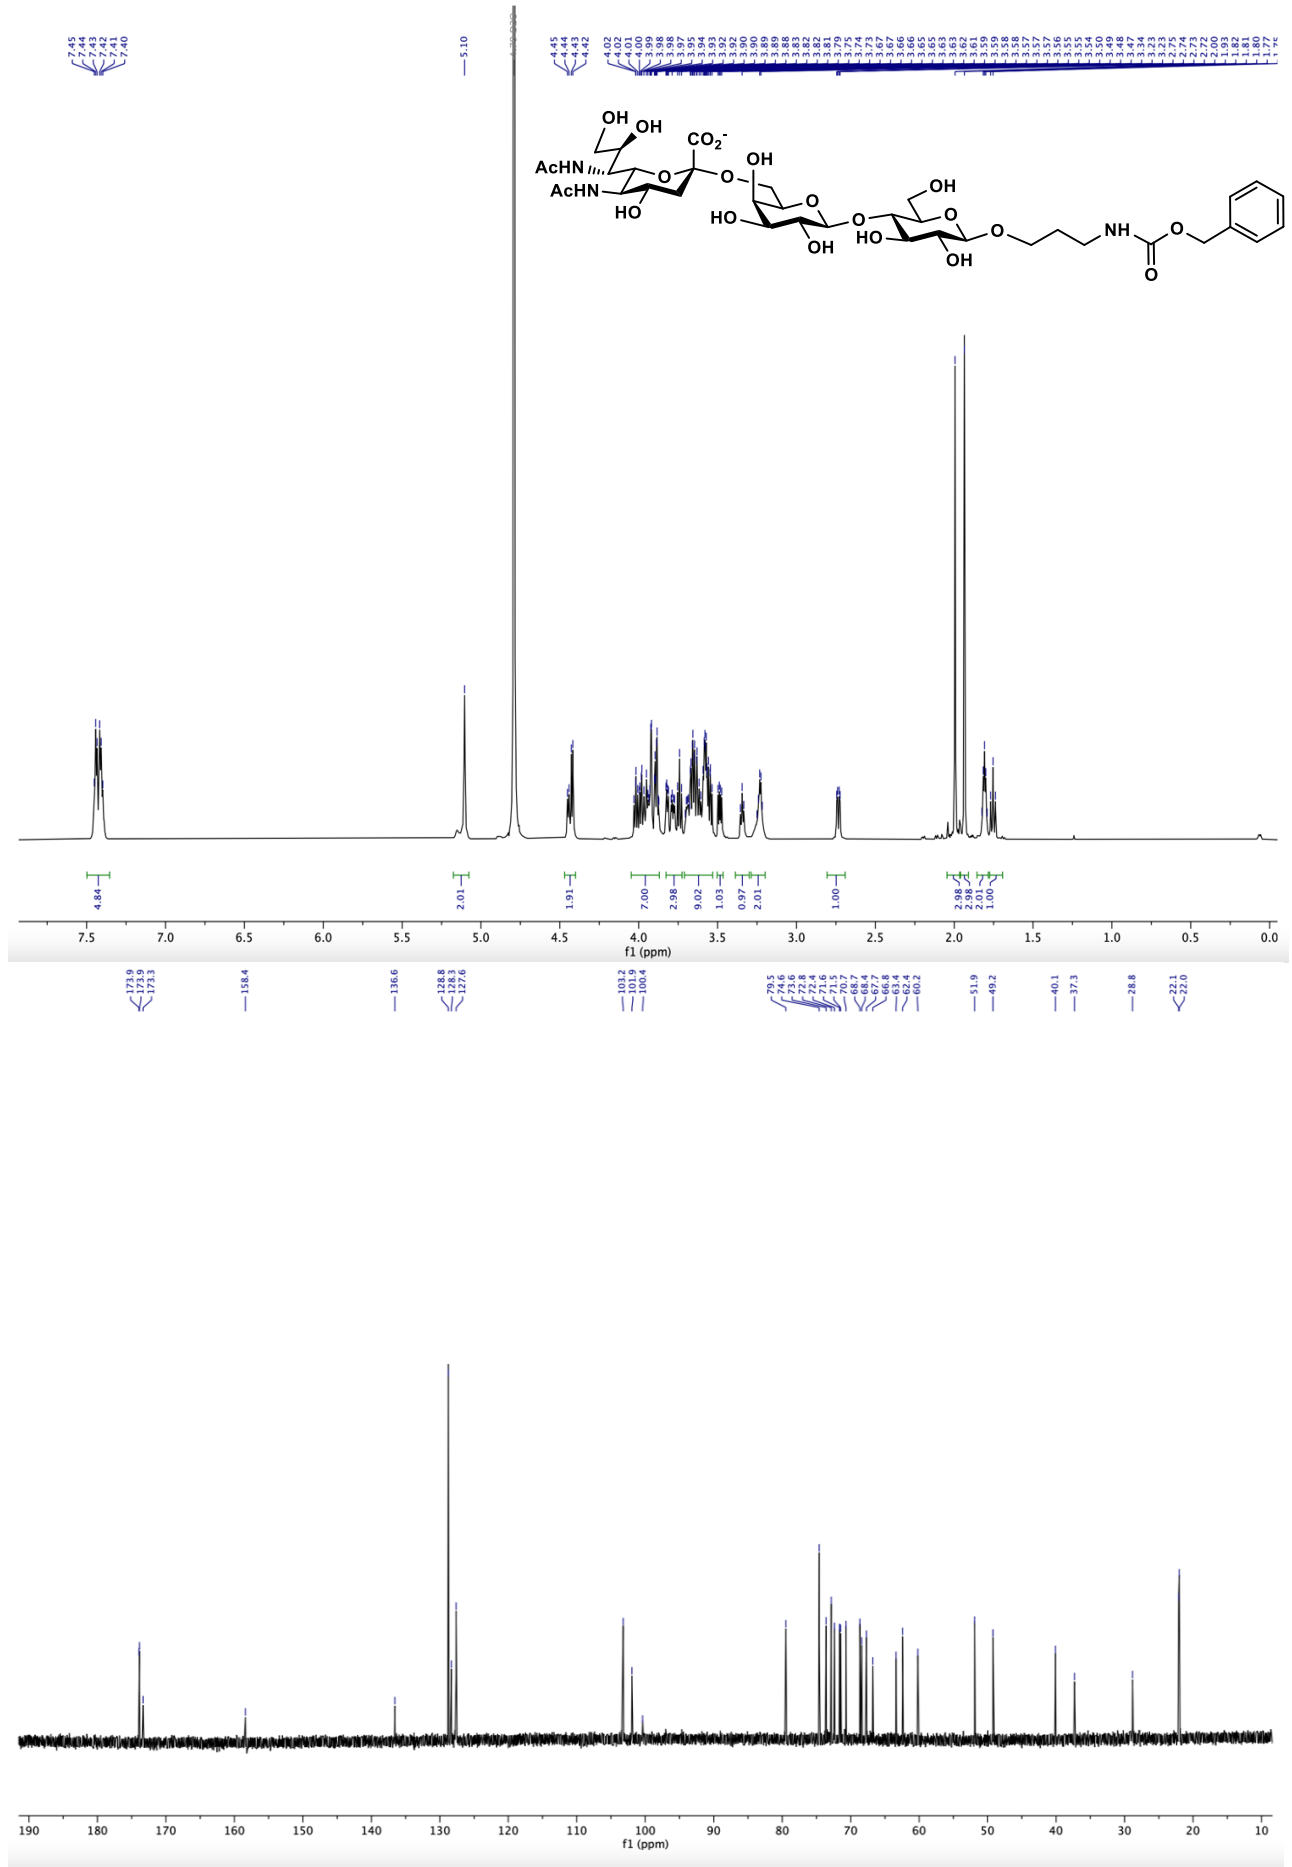

600 MHz  $^1\text{H}$  and 150 MHz  $^{13}\text{C}\{^1\text{H}\}$  NMR spectra of Neu5Ac7,9diNAc $\alpha$ 2-6Lac $\beta$ ProNHCbz (**60**) in  $\text{D}_2\text{O}$

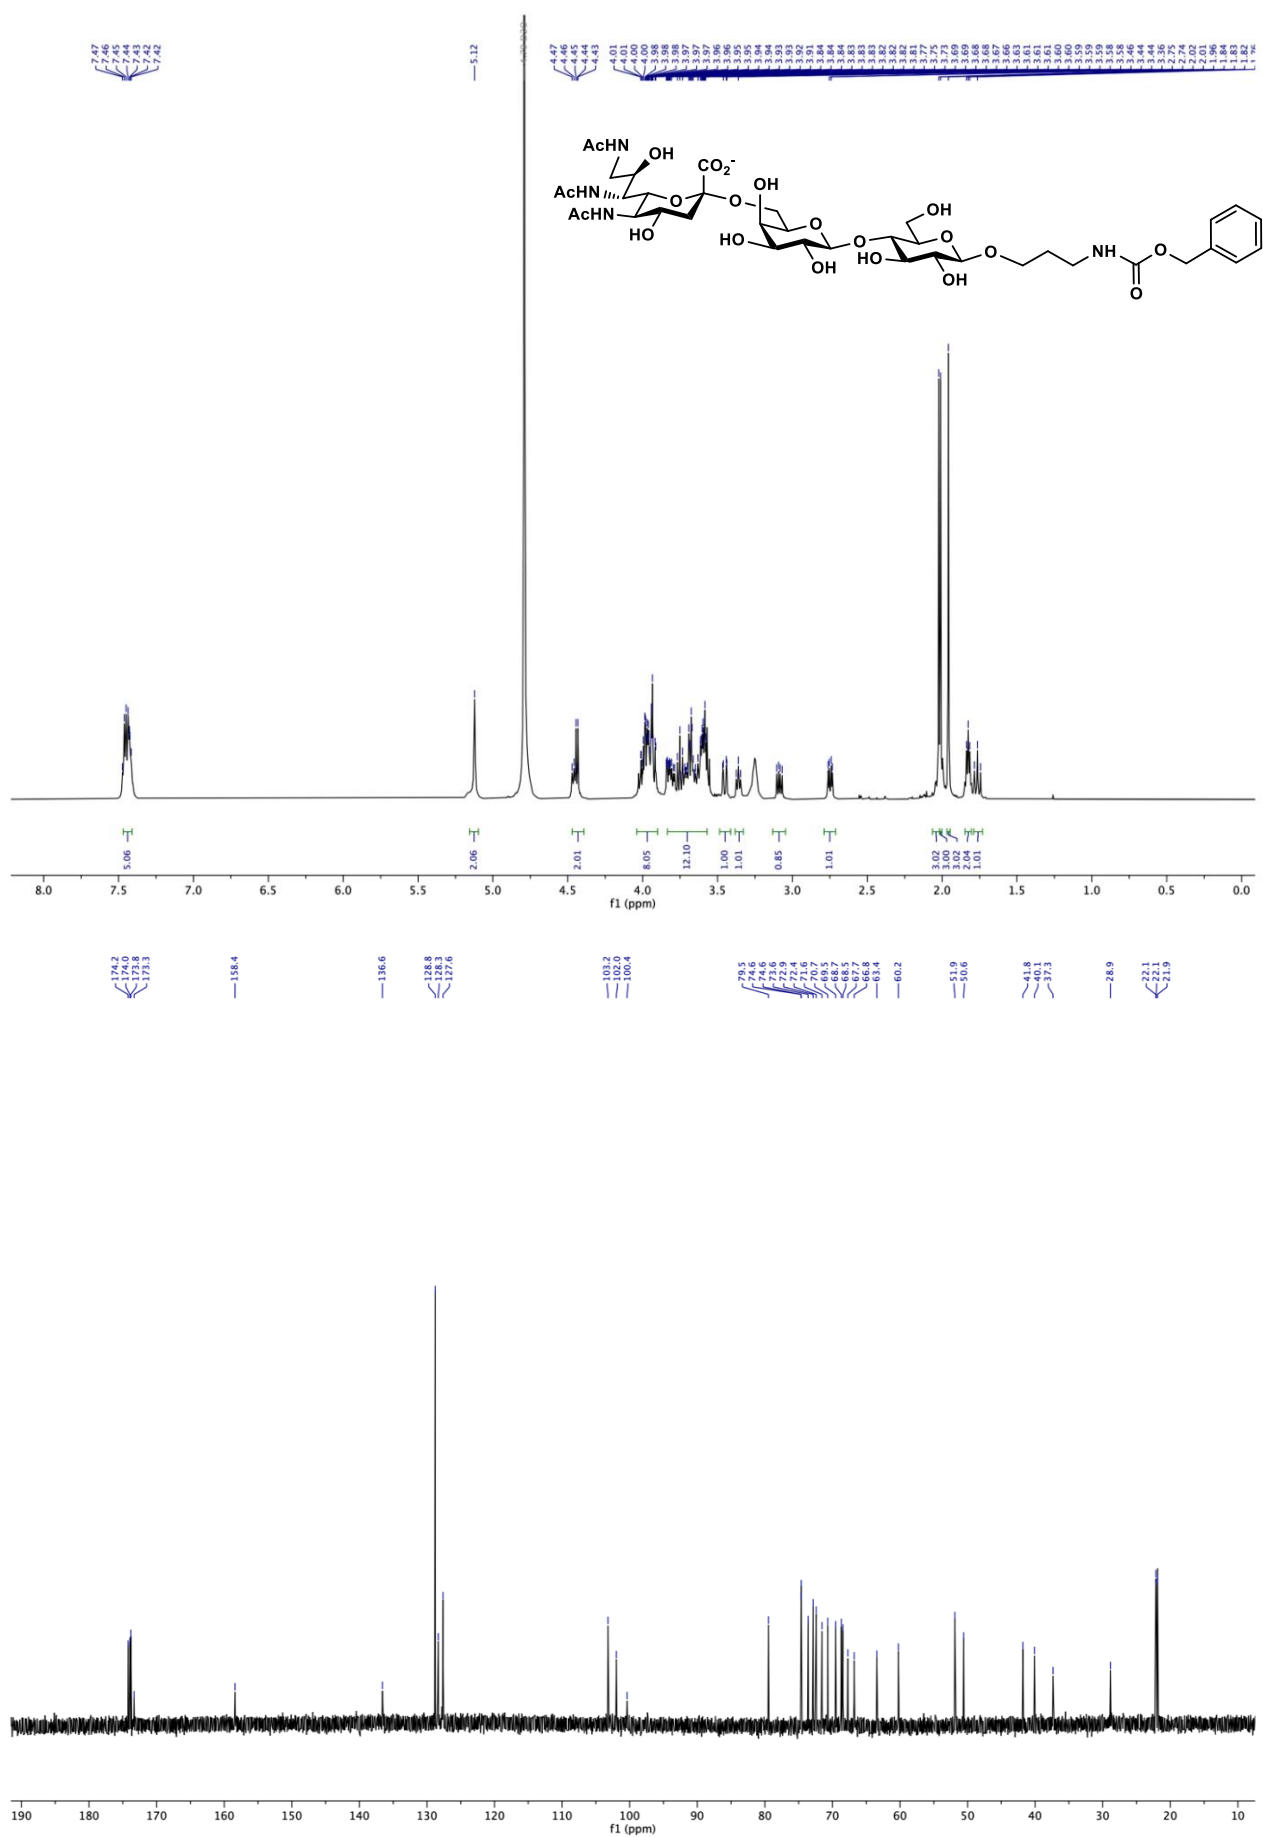



600 MHz  $^1\text{H}$  and 150 MHz  $^{13}\text{C}\{^1\text{H}\}$  NMR spectra of Neu5Ac7NAc $\alpha$ 2-3LacNAc $\beta$ ProNHCbz (**61**) in  $\text{D}_2\text{O}$

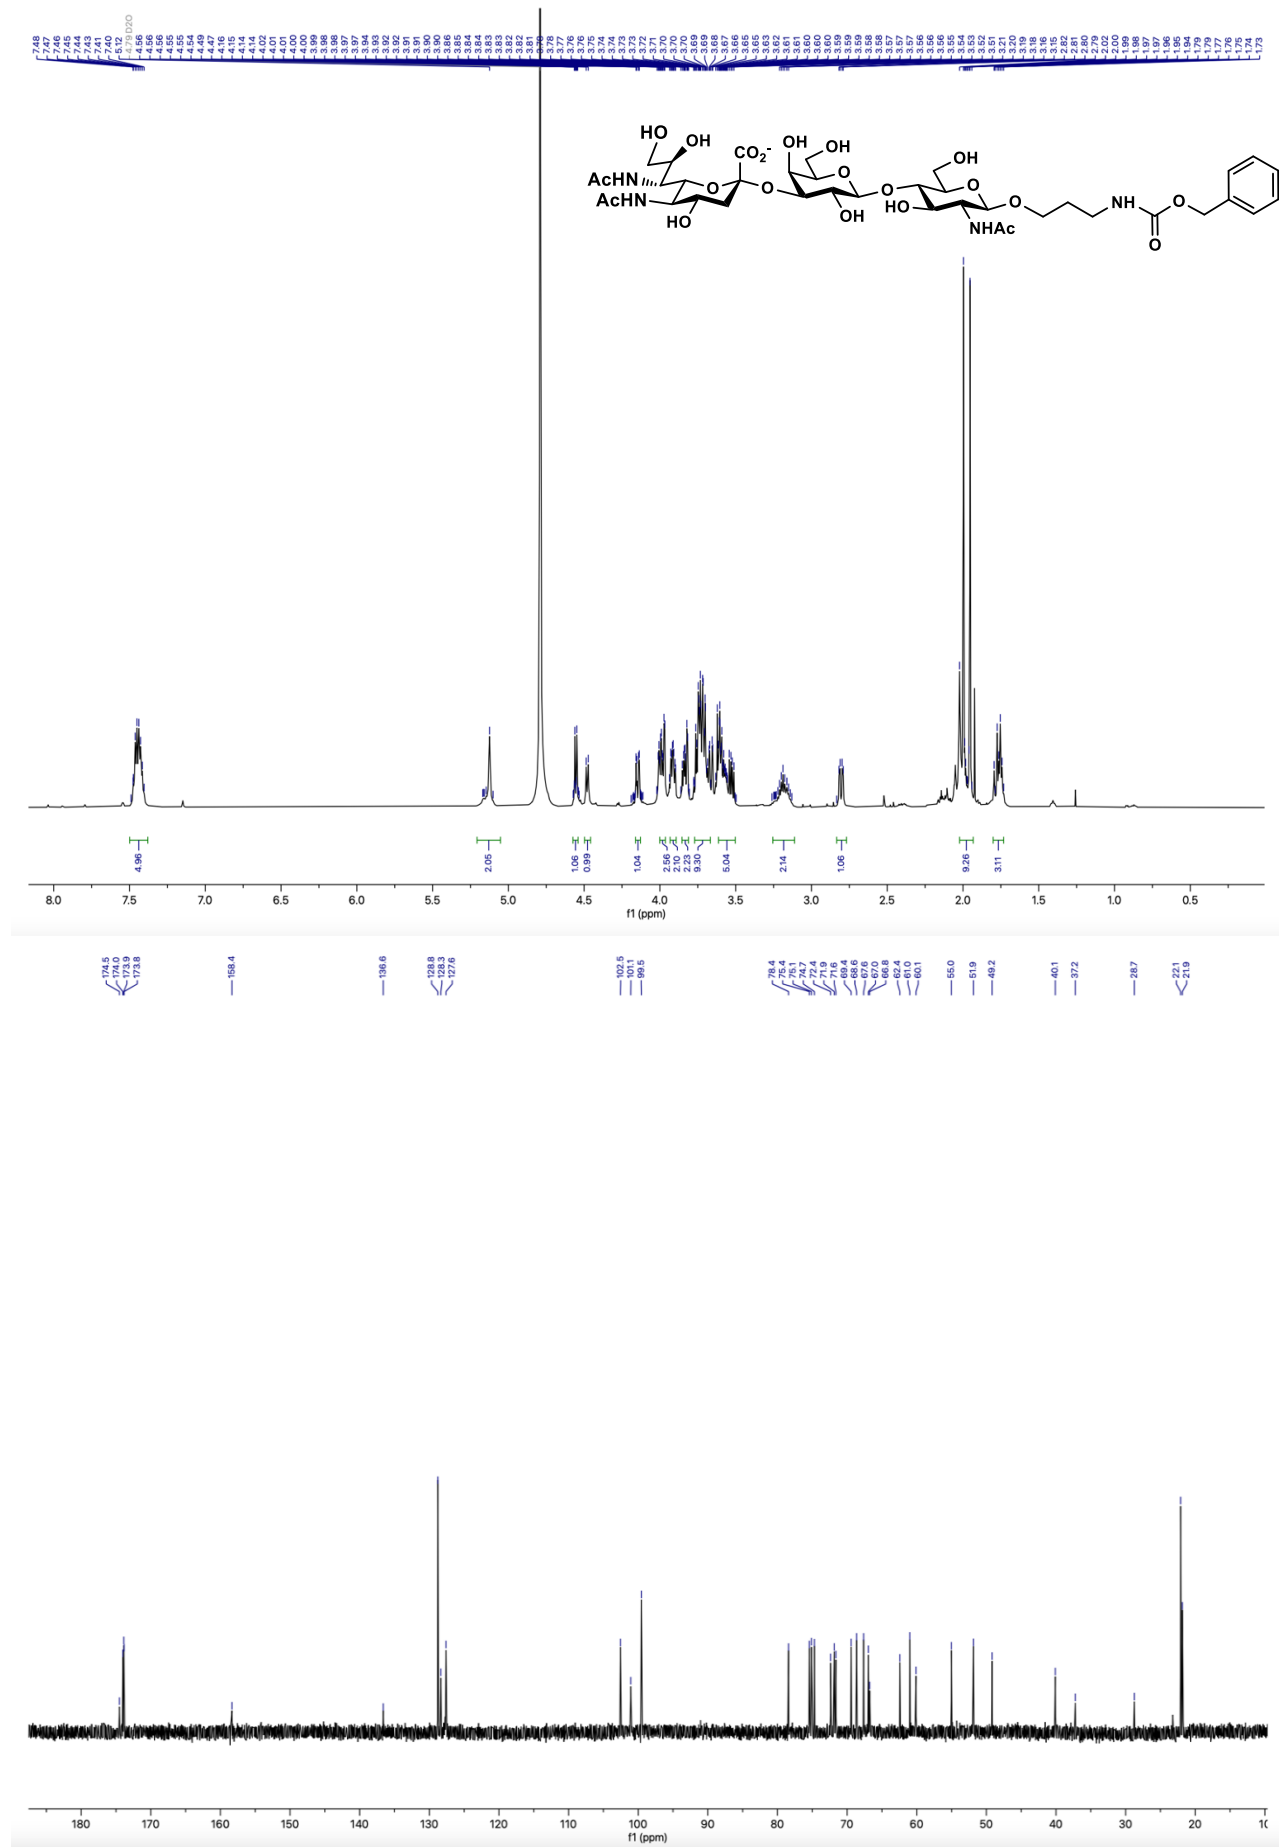

400 MHz  $^1\text{H}$  and 100 MHz  $^{13}\text{C}\{^1\text{H}\}$  NMR spectra of Neu5Ac7,9diNAc $\alpha$ 2-3LacNAc $\beta$ ProNHCBz (**62**) in  $\text{D}_2\text{O}$

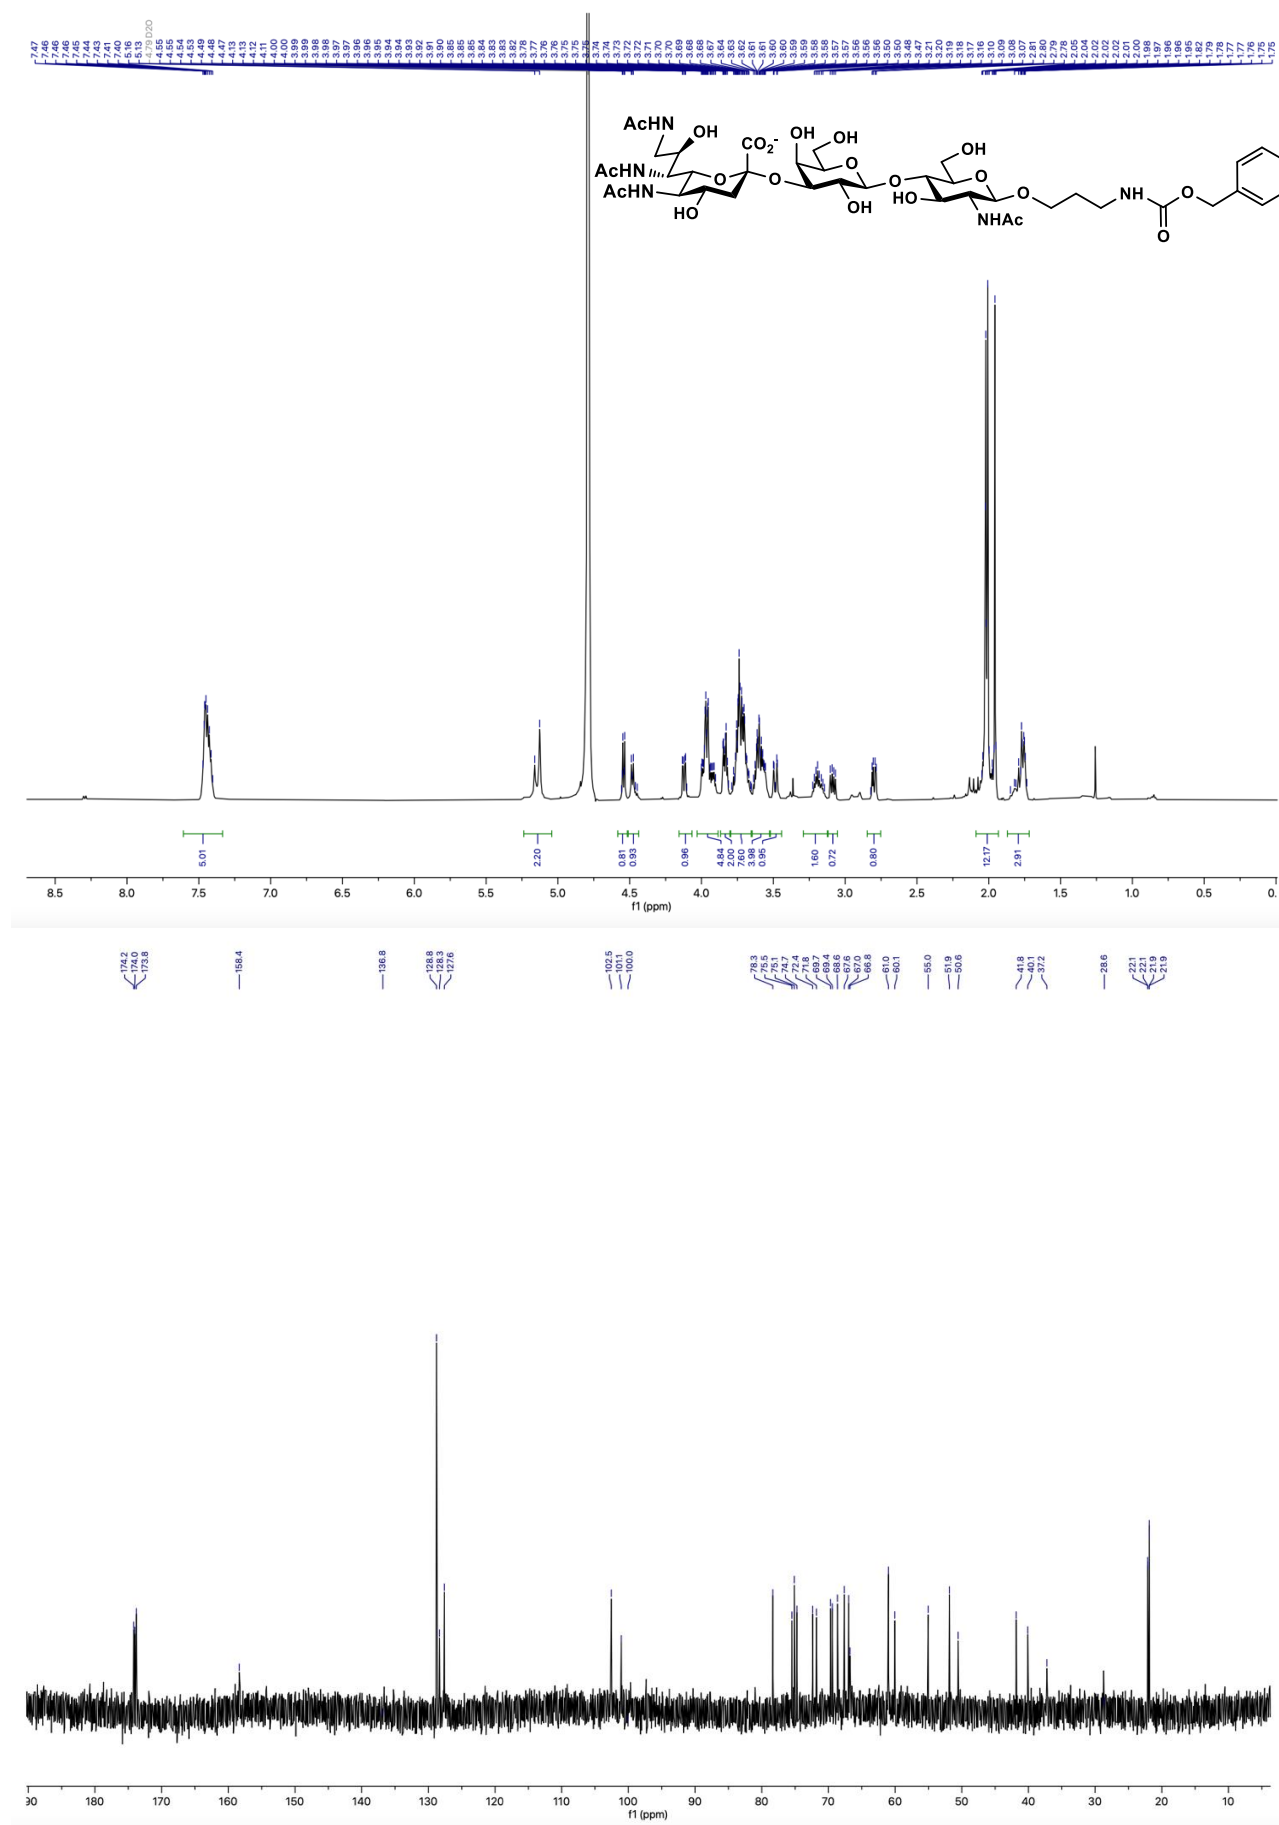

600 MHz  $^1\text{H}$  and 150 MHz  $^{13}\text{C}\{^1\text{H}\}$  NMR spectra of Neu5Ac7NAc $\alpha$ 2-6LacNAc $\beta$ ProNHCBz (**63**) in  $\text{D}_2\text{O}$

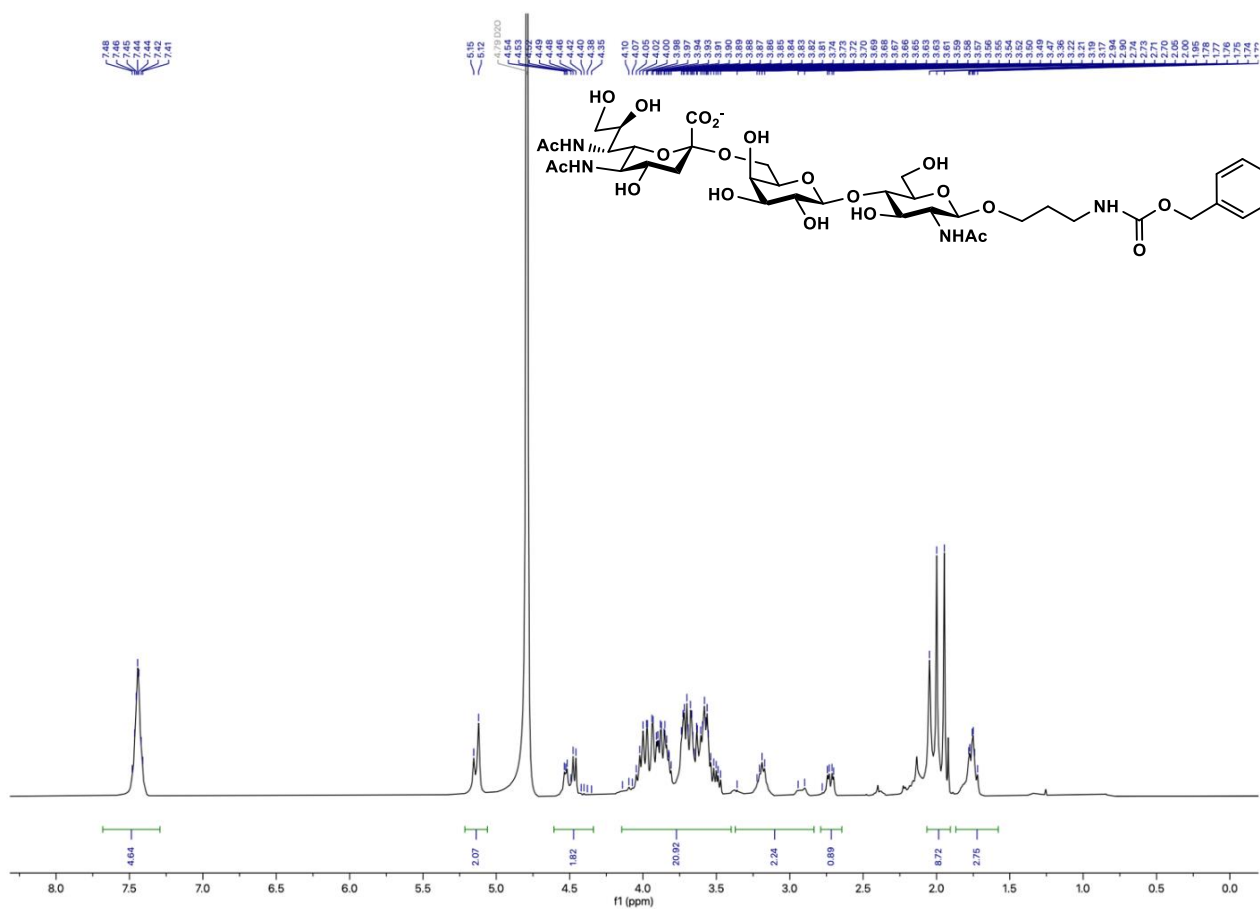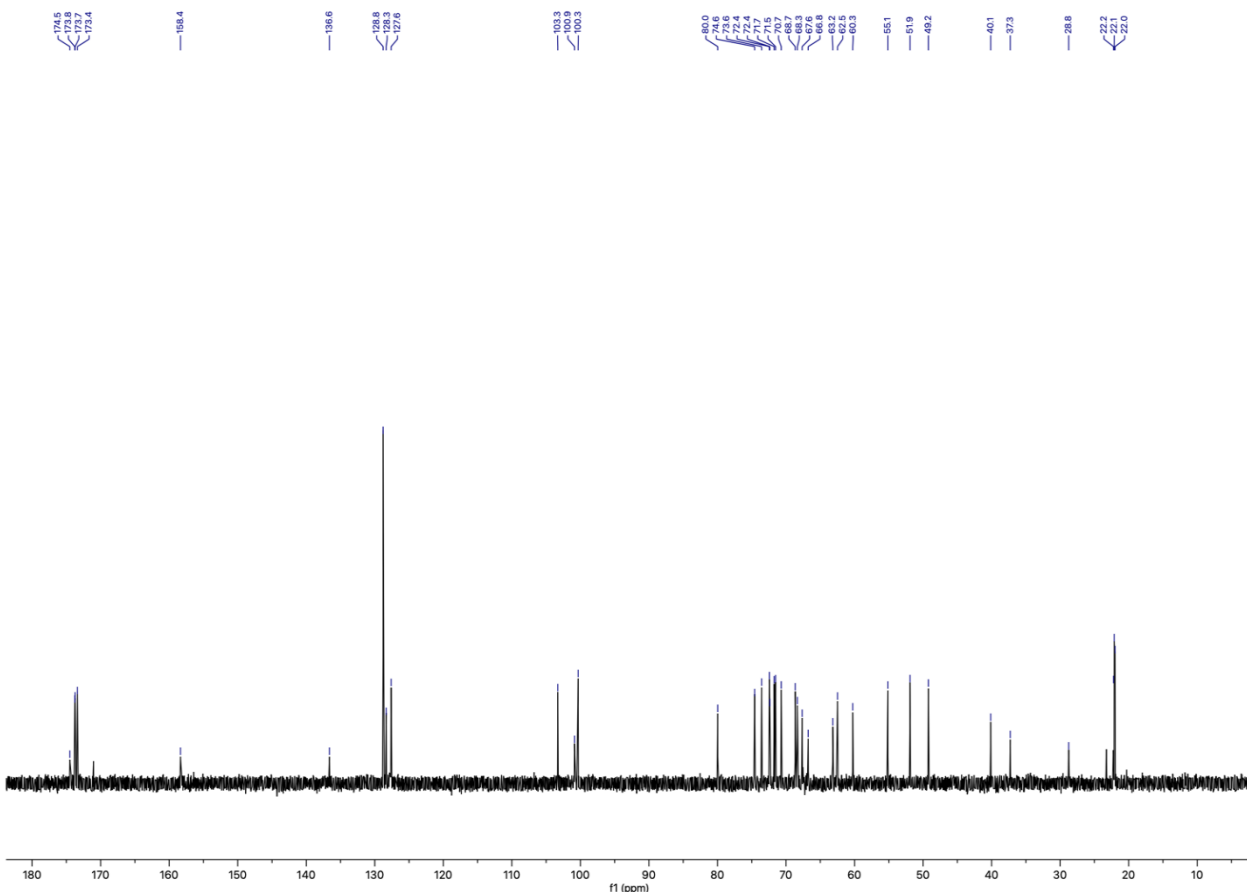

400 MHz  $^1\text{H}$  and 100 MHz  $^{13}\text{C}\{^1\text{H}\}$  NMR spectra of Neu5Ac7,9diNAc $\alpha$ 2-6LacNAc $\beta$ ProNHCBz (**64**) in  $\text{D}_2\text{O}$

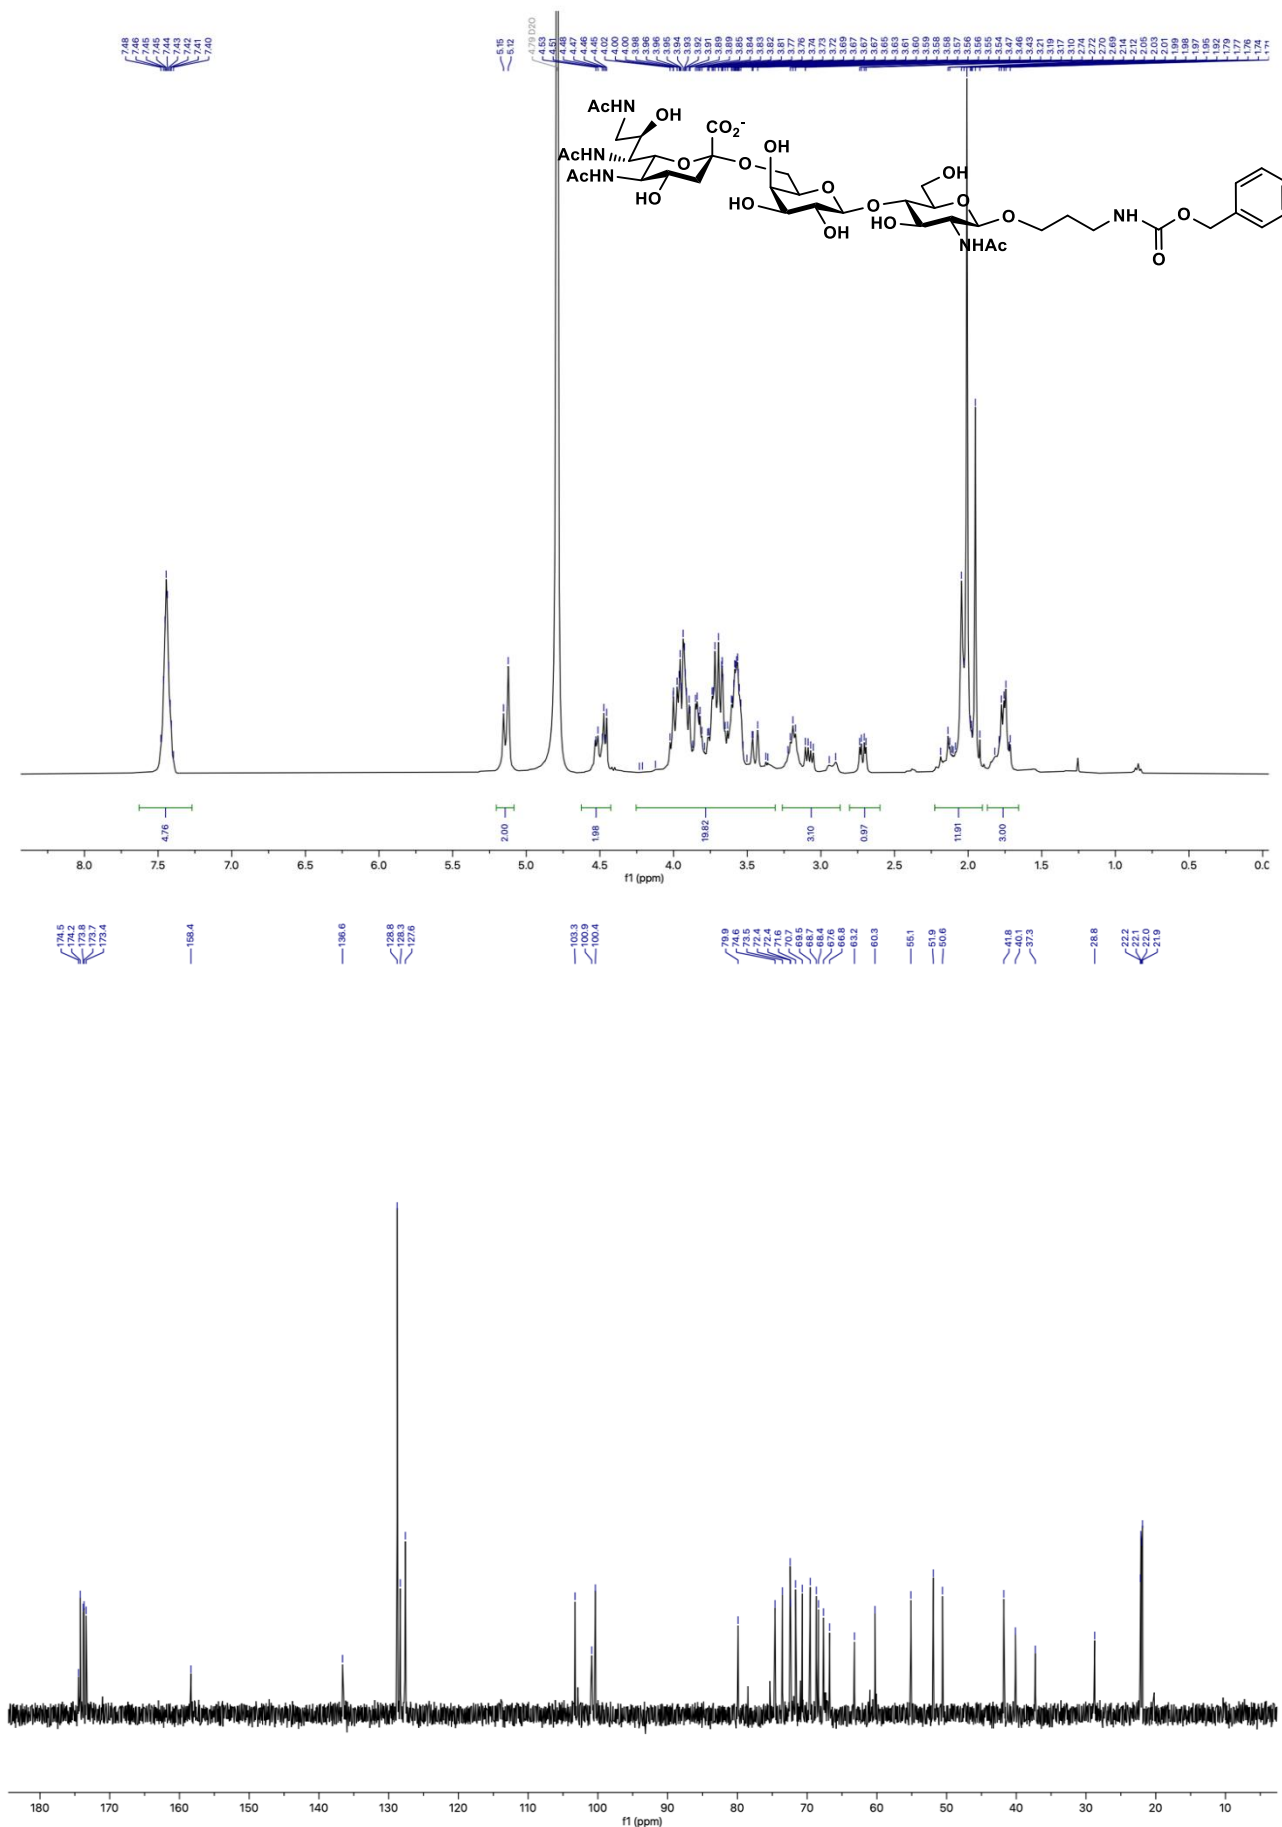

600 MHz  $^1\text{H}$  and 150 MHz  $^{13}\text{C}\{^1\text{H}\}$  NMR spectra of Neu5Ac7NAc $\alpha$ 2-3Gal $\beta$ 1-3GalNAc $\beta$ ProNHCBz (**65**) in  $\text{D}_2\text{O}$

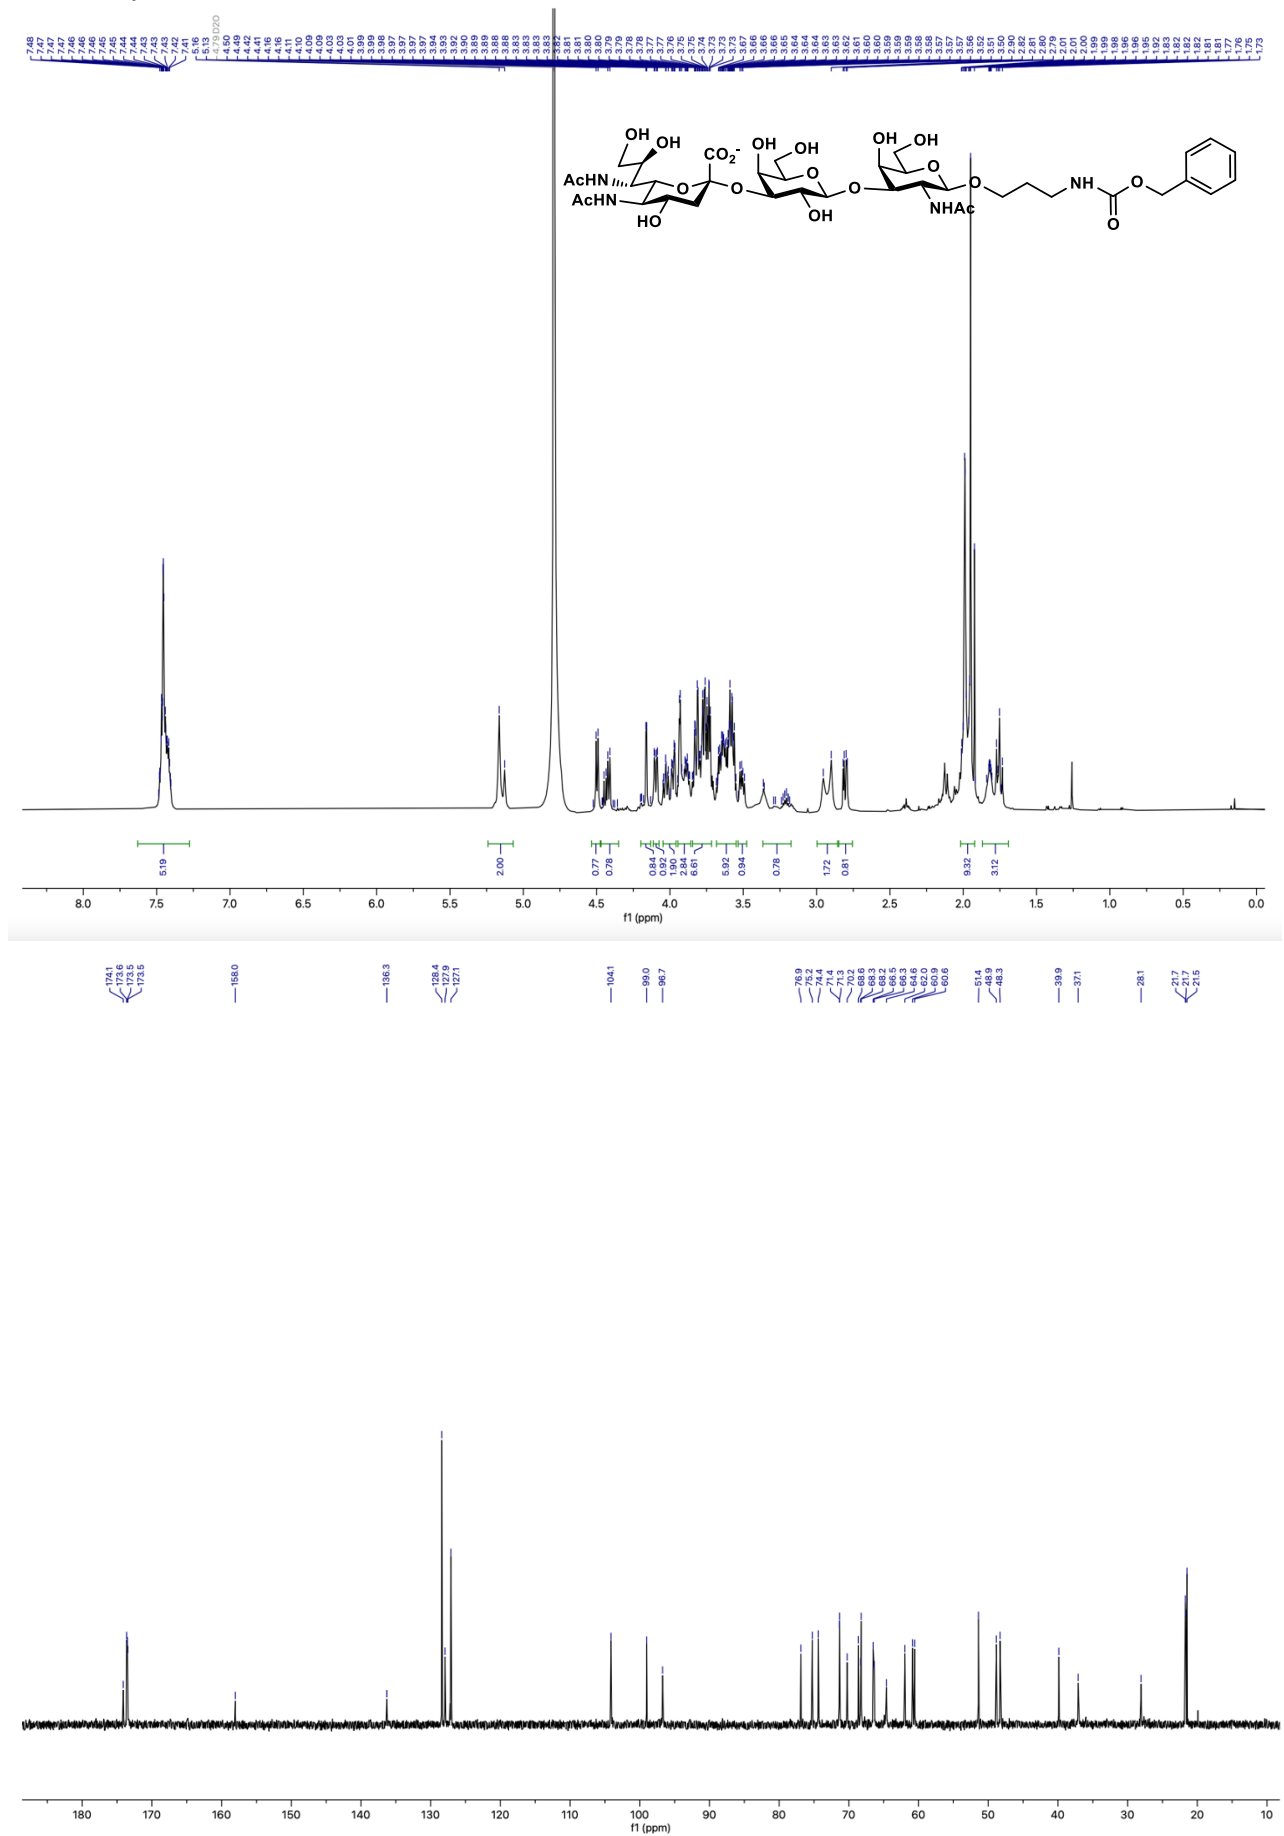

600 MHz <sup>1</sup>H and 150 MHz <sup>13</sup>C{<sup>1</sup>H} NMR spectra of Neu5Ac7,9diNAcα2-3Galβ1-3GalNAcβProNHCBz (**66**) in D<sub>2</sub>O

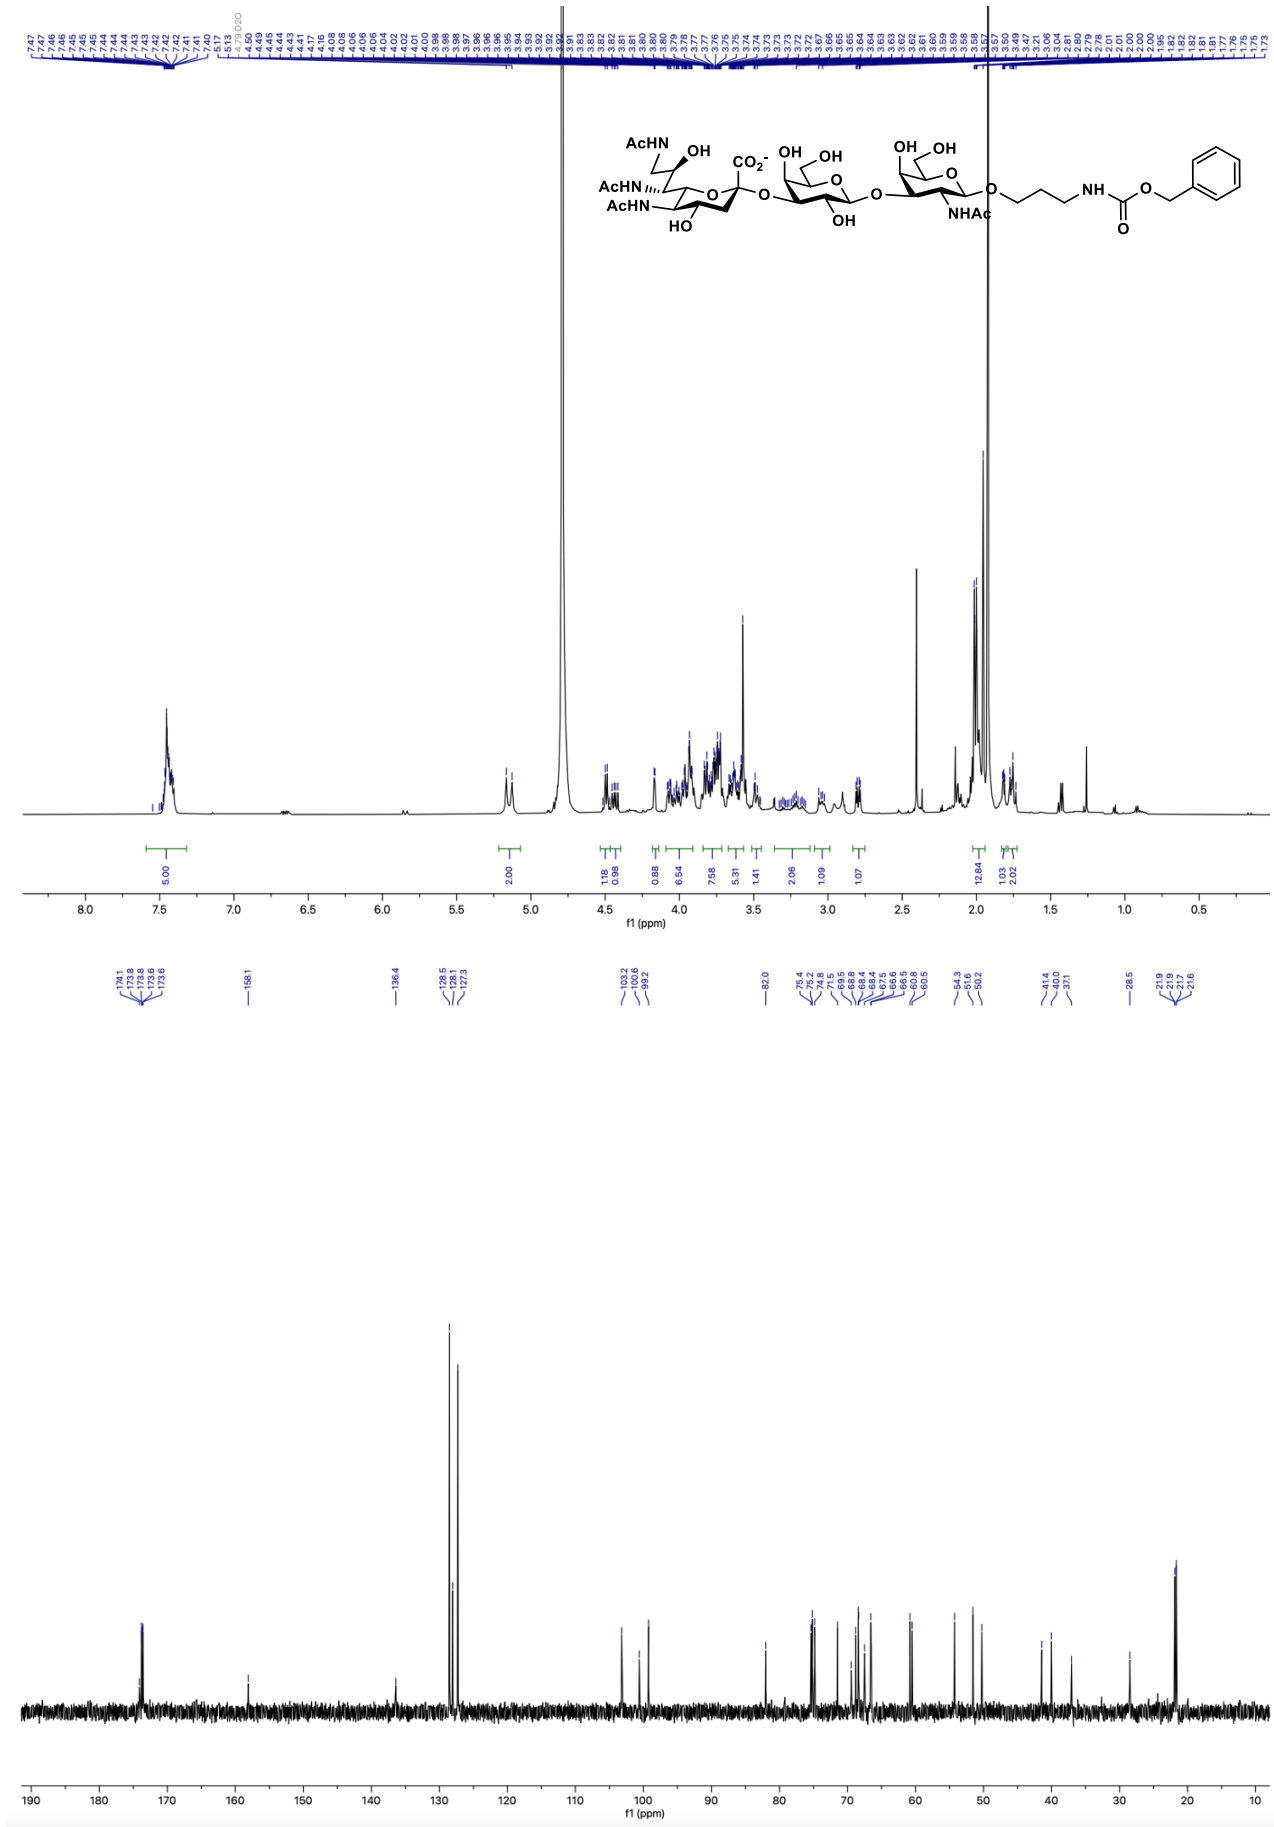

600 MHz  $^1\text{H}$  and 150 MHz  $^{13}\text{C}\{^1\text{H}\}$  NMR spectra of Neu5Ac7NAc $\alpha$ 2-6Gal $\beta$ 1-3GalNAc $\beta$ ProNHCbz (**67**) in D $_2$ O

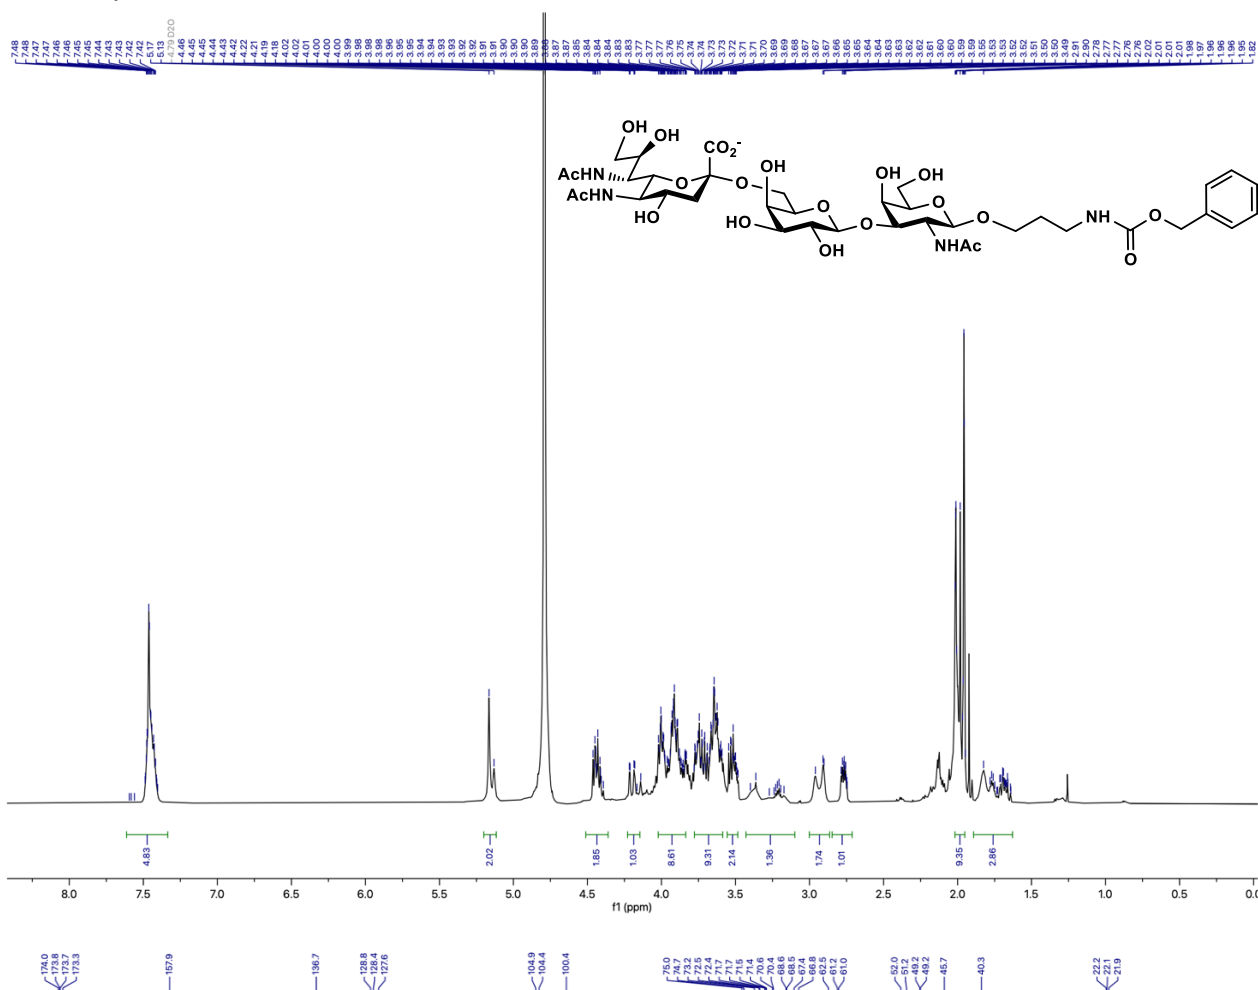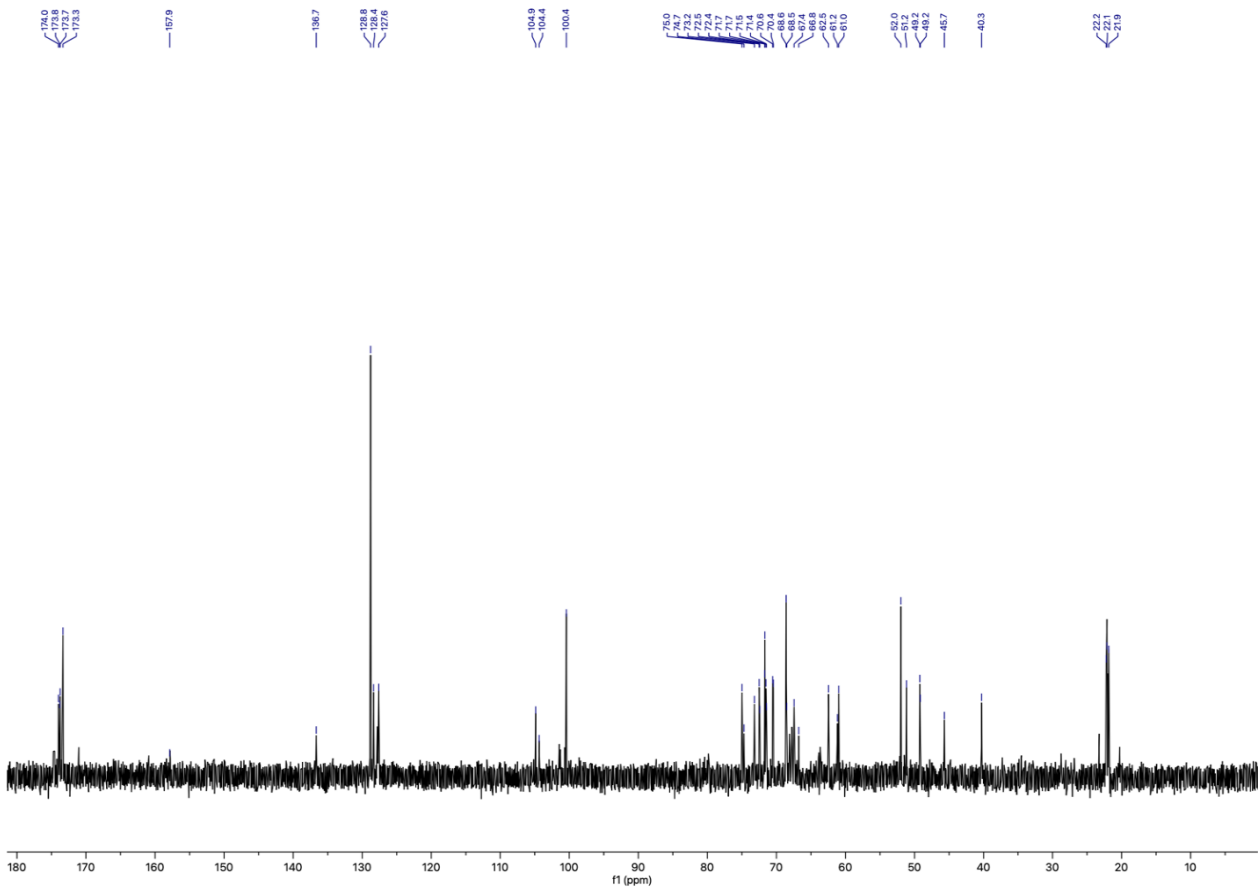

600 MHz  $^1\text{H}$  and 150 MHz  $^{13}\text{C}\{^1\text{H}\}$  NMR spectra of Neu5Ac7,9diNAc $\alpha$ 2-6Gal $\beta$ 1-3GalNAc $\beta$ ProNHCbz (**68**) in  $\text{D}_2\text{O}$

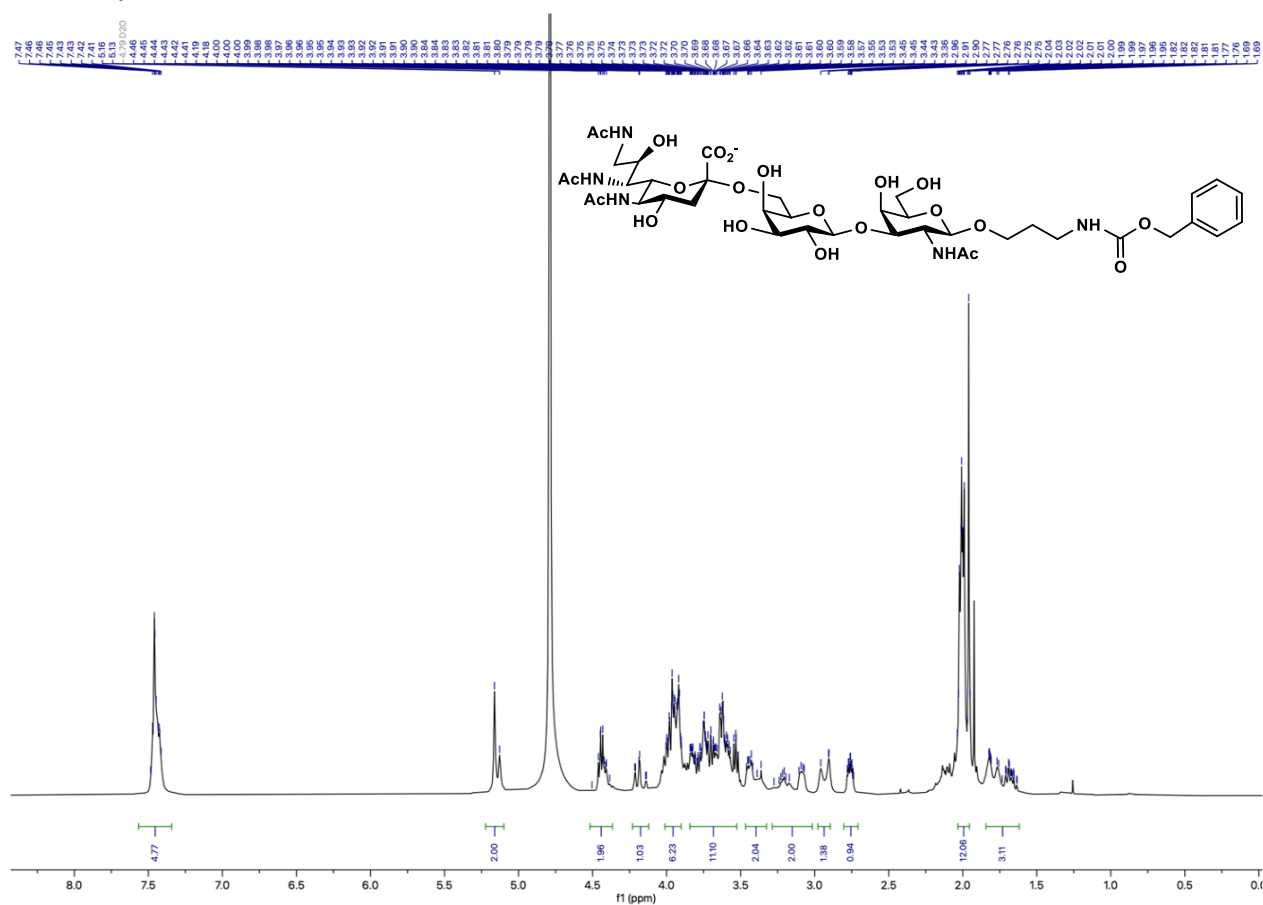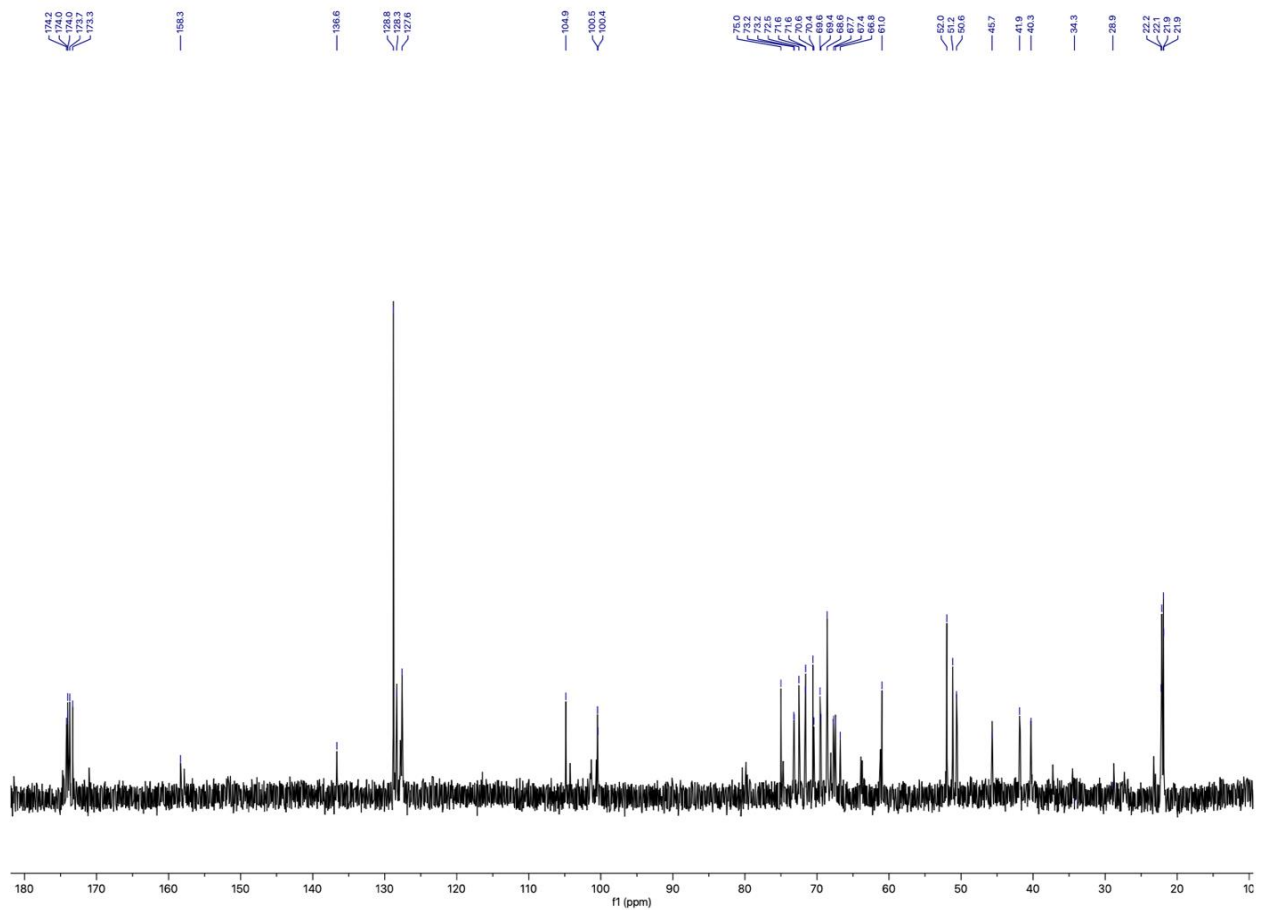



600 MHz  $^1\text{H}$  and 150 MHz  $^{13}\text{C}\{^1\text{H}\}$  NMR spectra of Neu5Ac7NAc $\alpha$ 2-3Gal $\beta$ 1-3GalNAc $\alpha$ ProNHCbz (**69**) in  $\text{D}_2\text{O}$

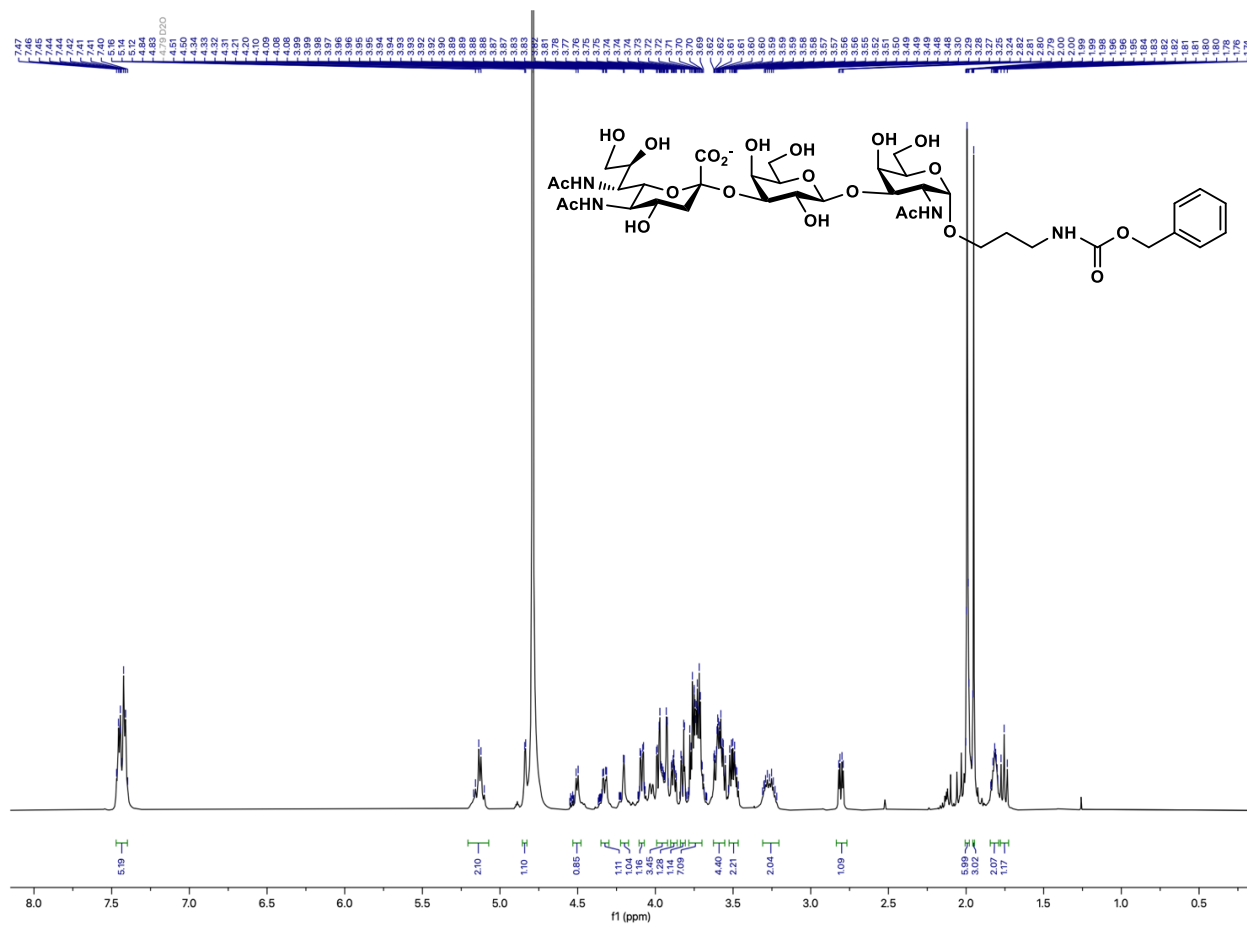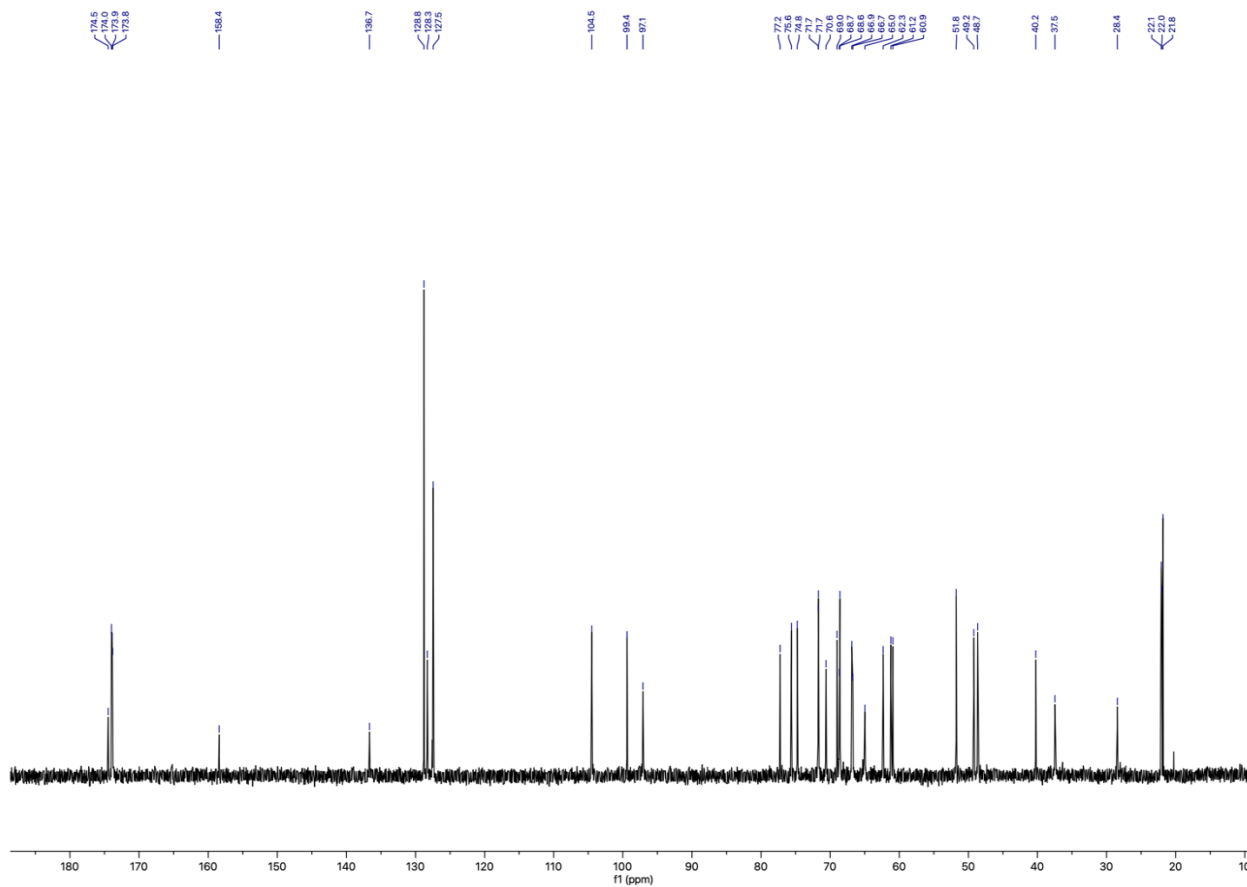

400 MHz  $^1\text{H}$  and 100 MHz  $^{13}\text{C}\{^1\text{H}\}$  NMR spectra of Neu5Ac7,9diNAc $\alpha$ 2-3Gal $\beta$ 1-3GalNAc $\alpha$ ProNHCbz (**70**) in  $\text{D}_2\text{O}$

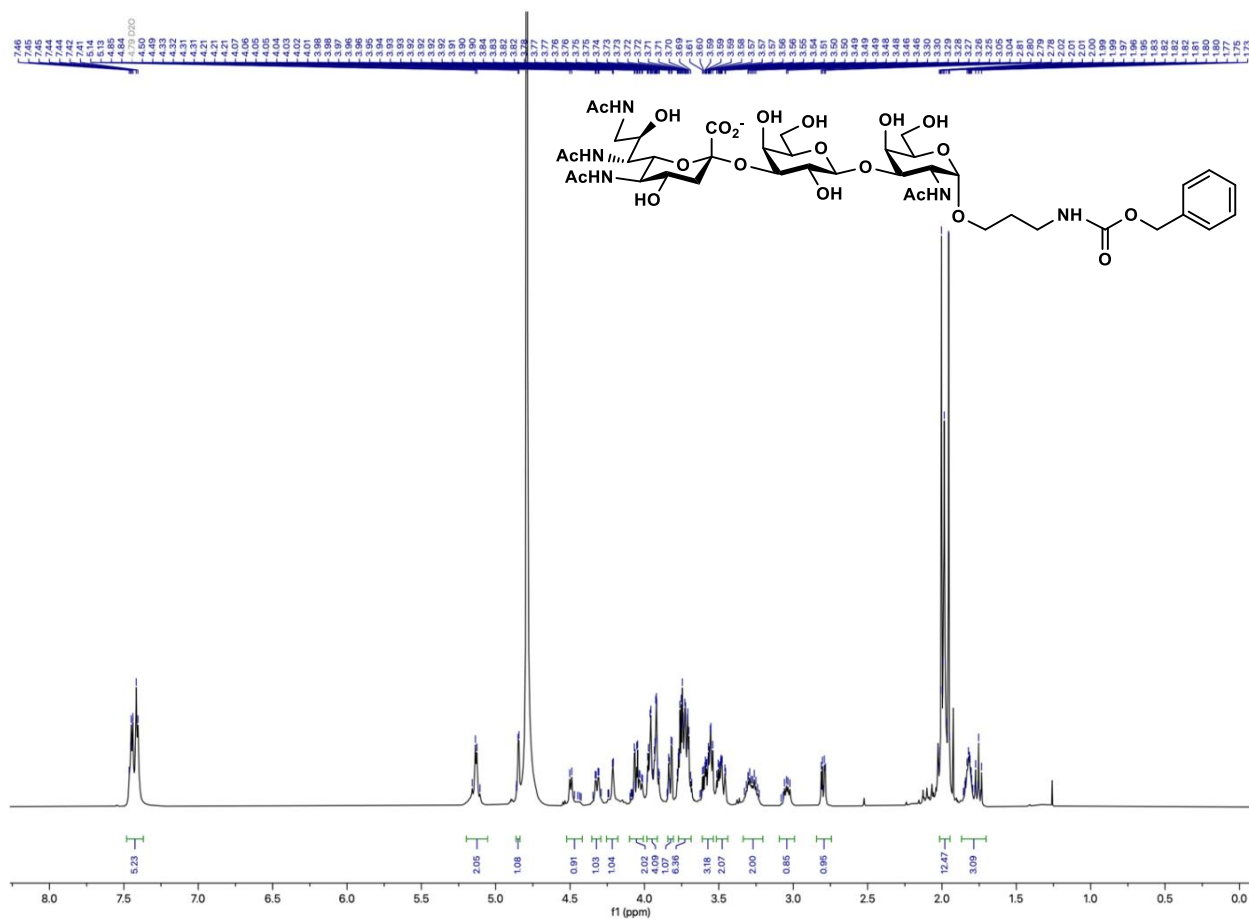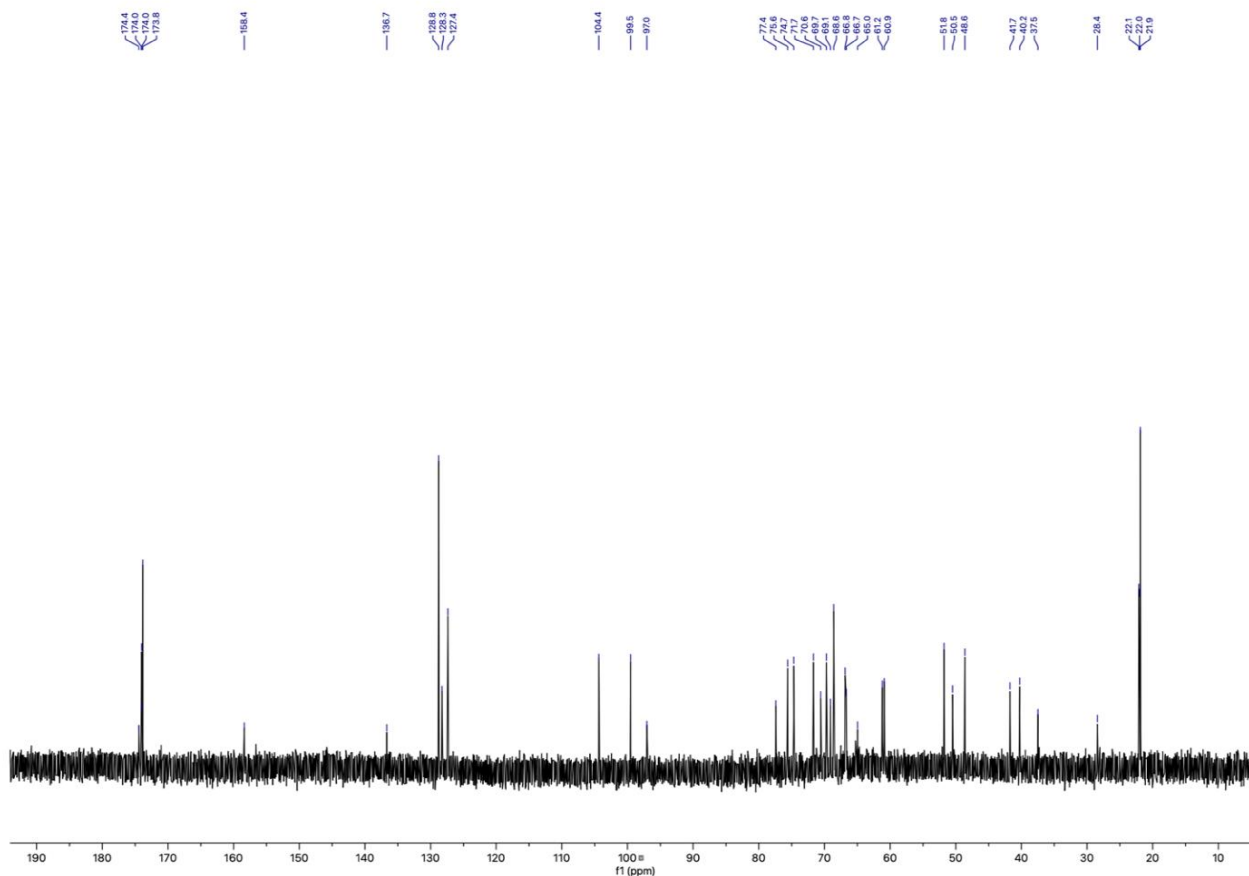

600 MHz  $^1\text{H}$  and 150 MHz  $^{13}\text{C}\{^1\text{H}\}$  NMR spectra of Neu5Ac7NAc $\alpha$ 2-6Gal $\beta$ 1-3GalNAc $\alpha$ ProNHCbz (**71**) in  $\text{D}_2\text{O}$

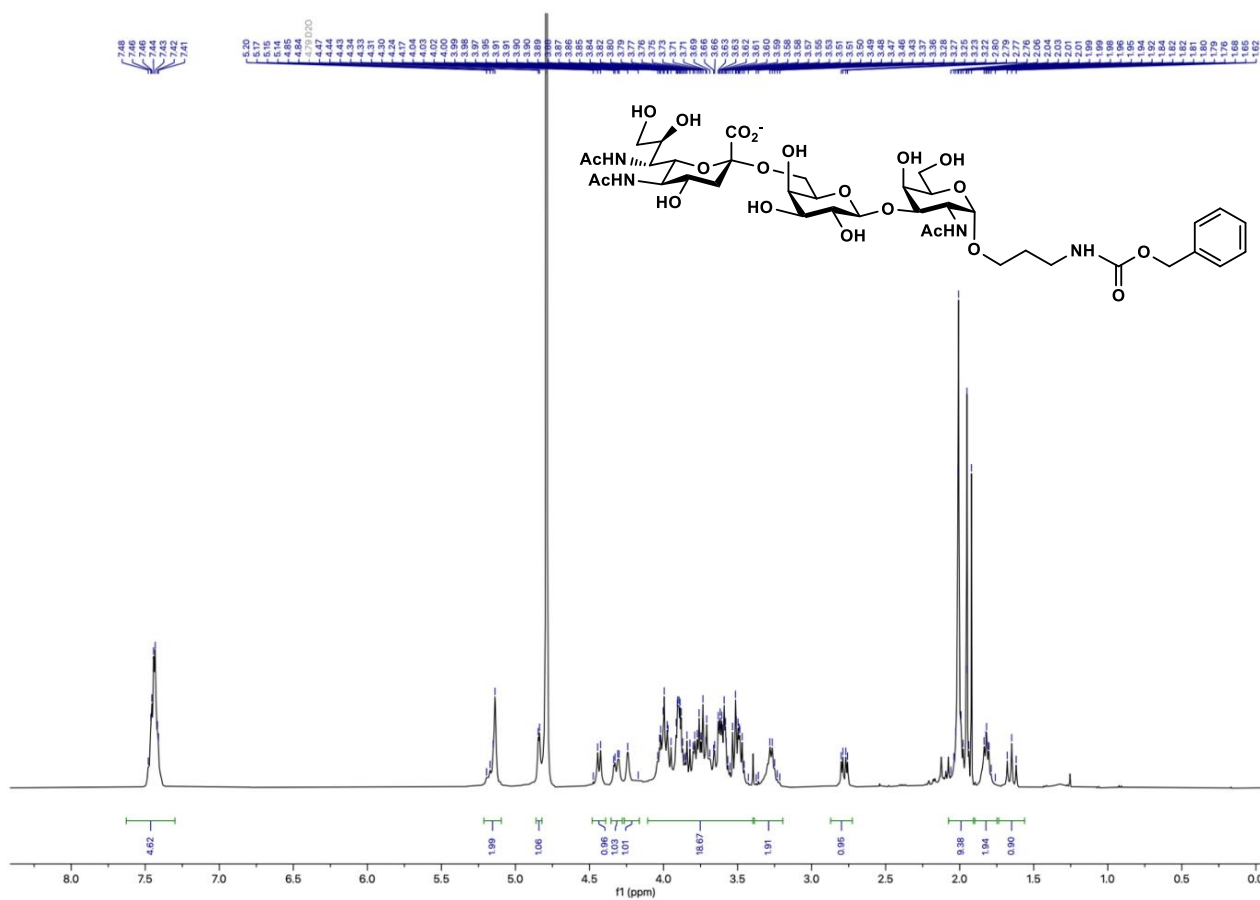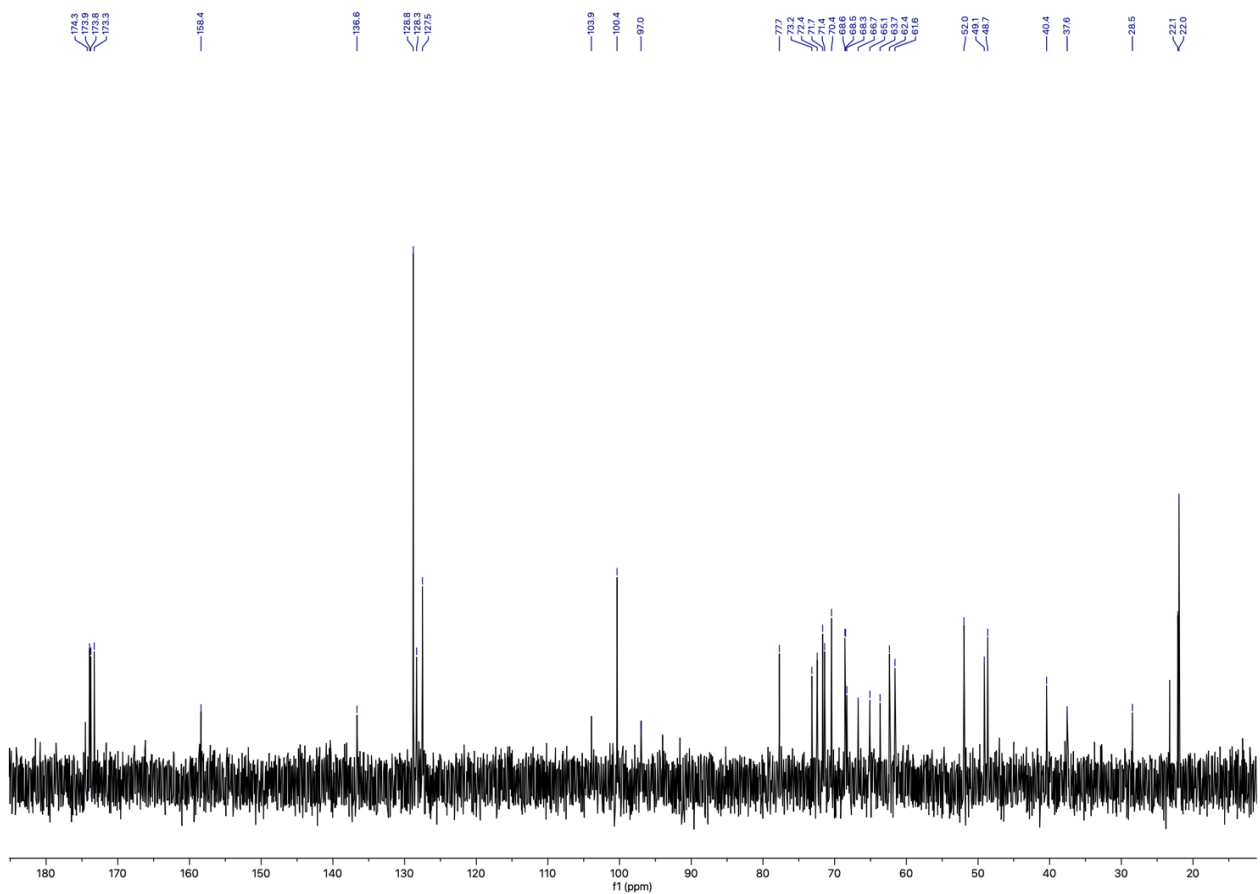

400 MHz  $^1\text{H}$  and 100 MHz  $^{13}\text{C}\{^1\text{H}\}$  NMR spectra of Neu5Ac7,9diNAc $\alpha$ 2-6Gal $\beta$ 1-3GalNAc $\alpha$ ProNHCbz (**72**) in  $\text{D}_2\text{O}$

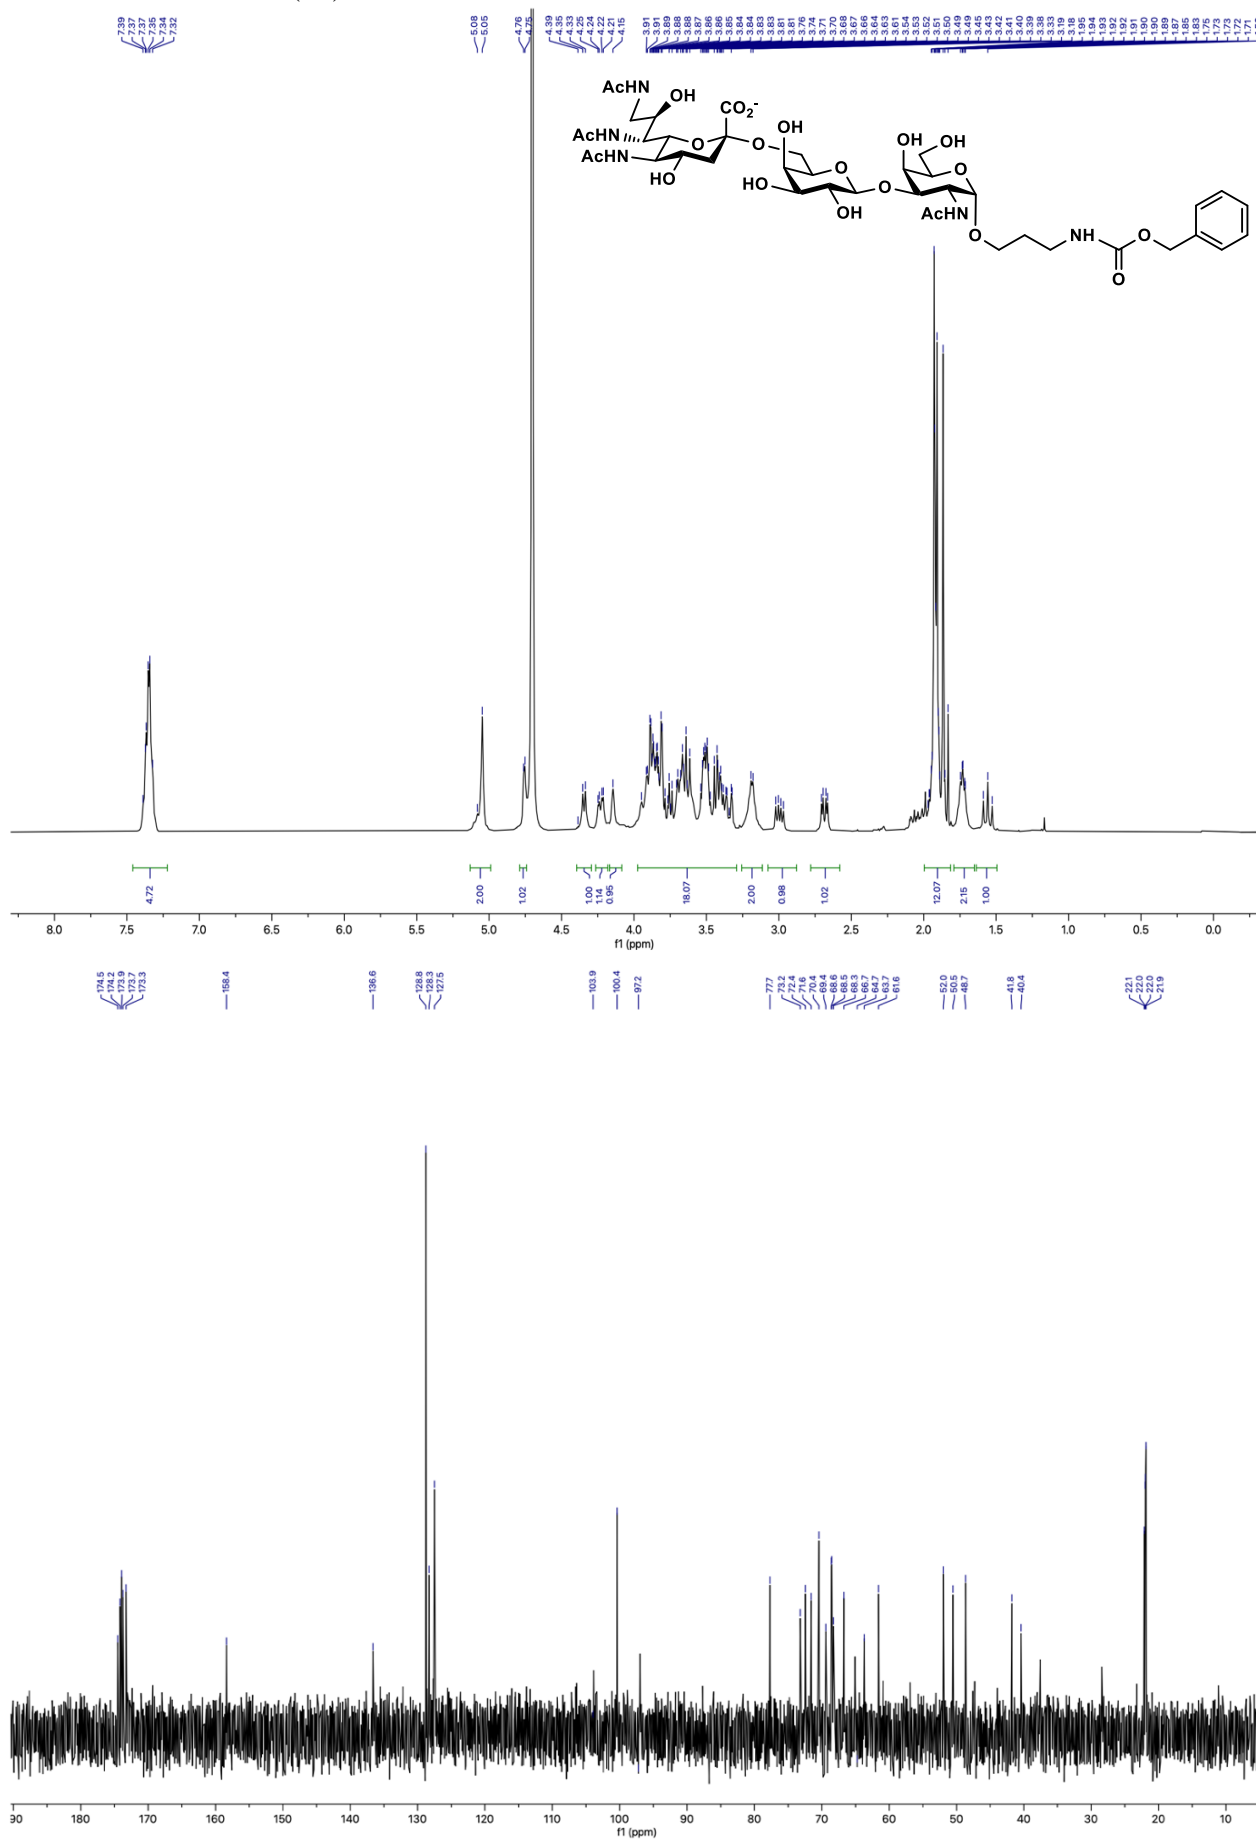

600 MHz  $^1\text{H}$  and 150 MHz  $^{13}\text{C}\{^1\text{H}\}$  NMR spectra of Neu5Ac7NAc $\alpha$ 2-3Gal $\beta$ 1-3GlcNAc $\beta$ ProNHCBz (**73**) in  $\text{D}_2\text{O}$

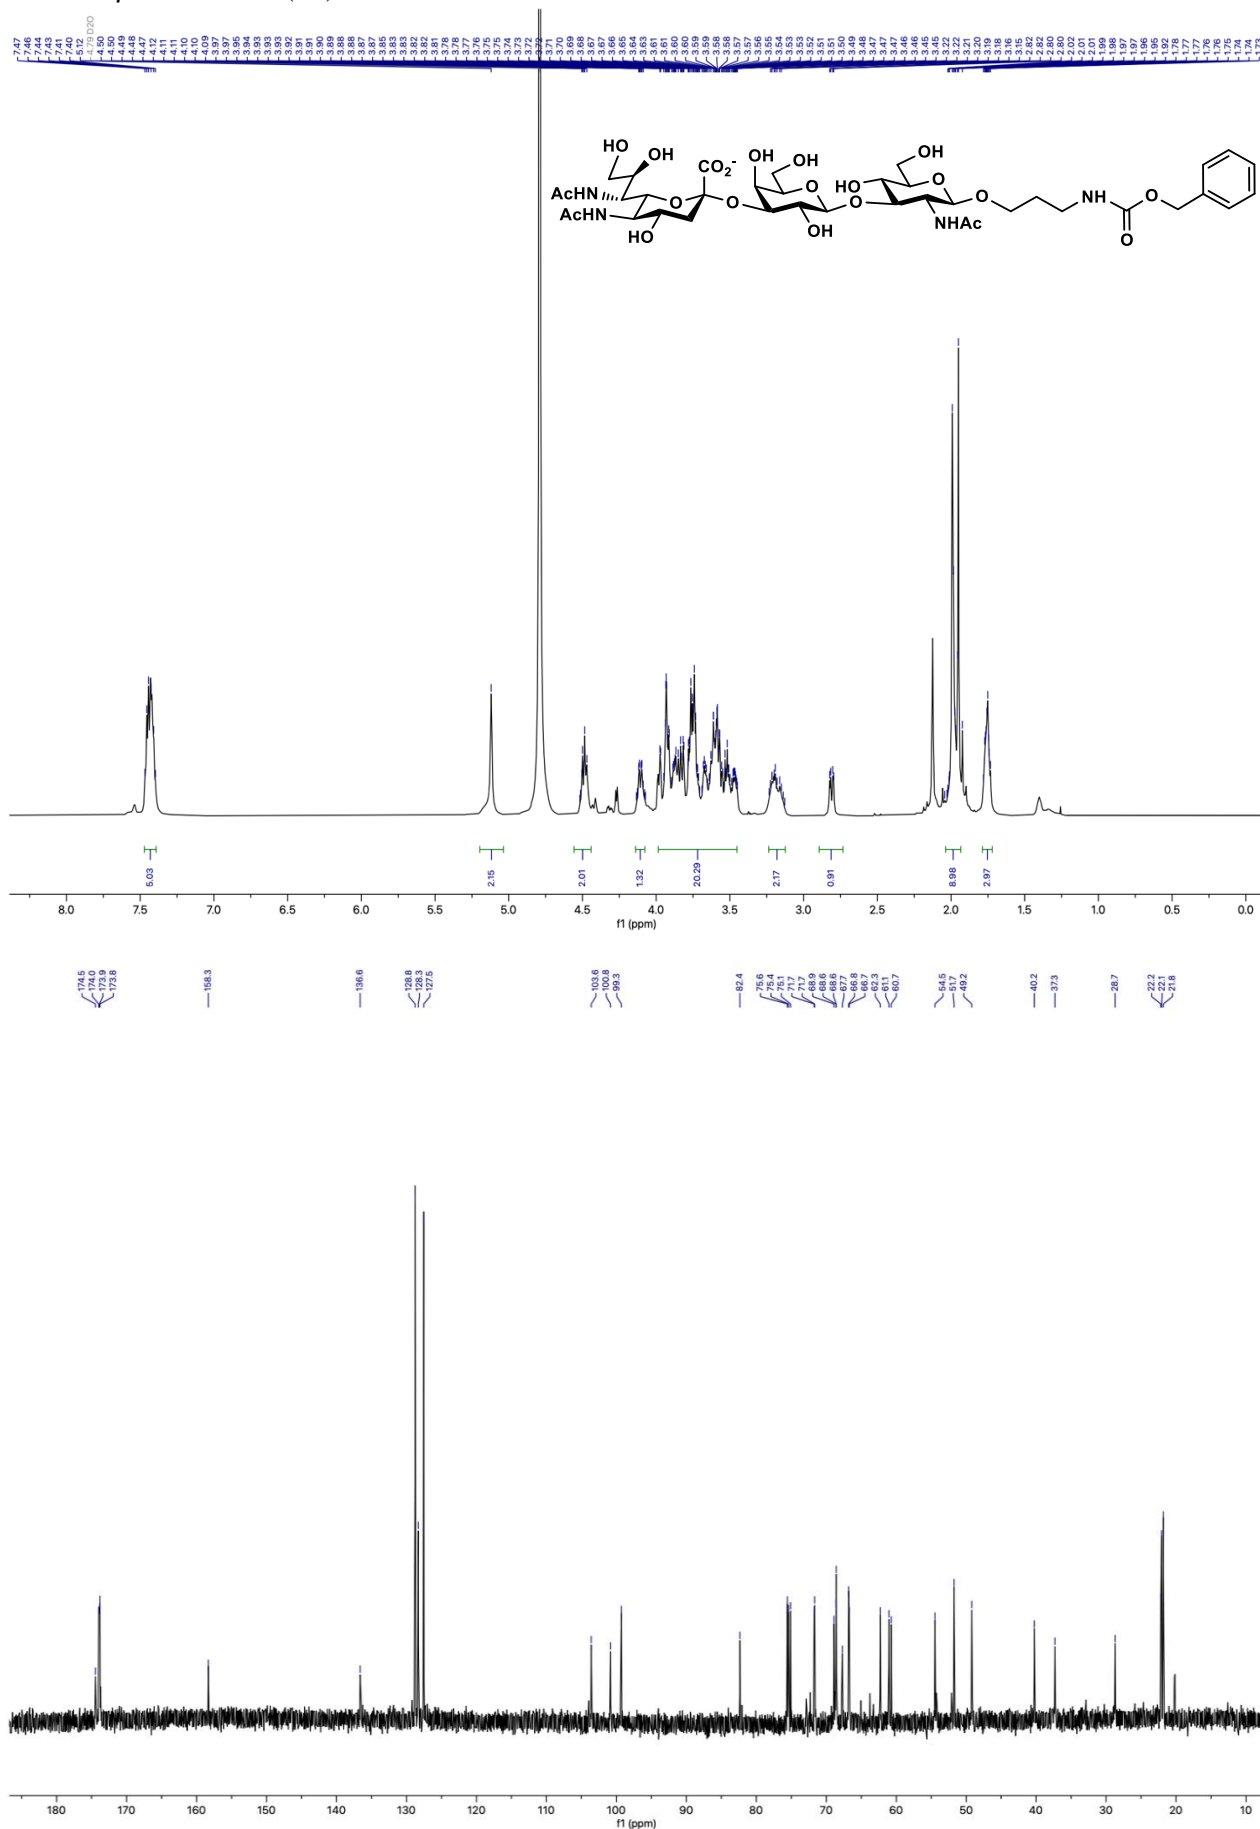

400 MHz  $^1\text{H}$  and 100 MHz  $^{13}\text{C}\{^1\text{H}\}$  NMR spectra of Neu5Ac7,9diNAc $\alpha$ 2-3Gal $\beta$ 1-3GlcNAc $\beta$ ProNHCBz (**74**) in  $\text{D}_2\text{O}$

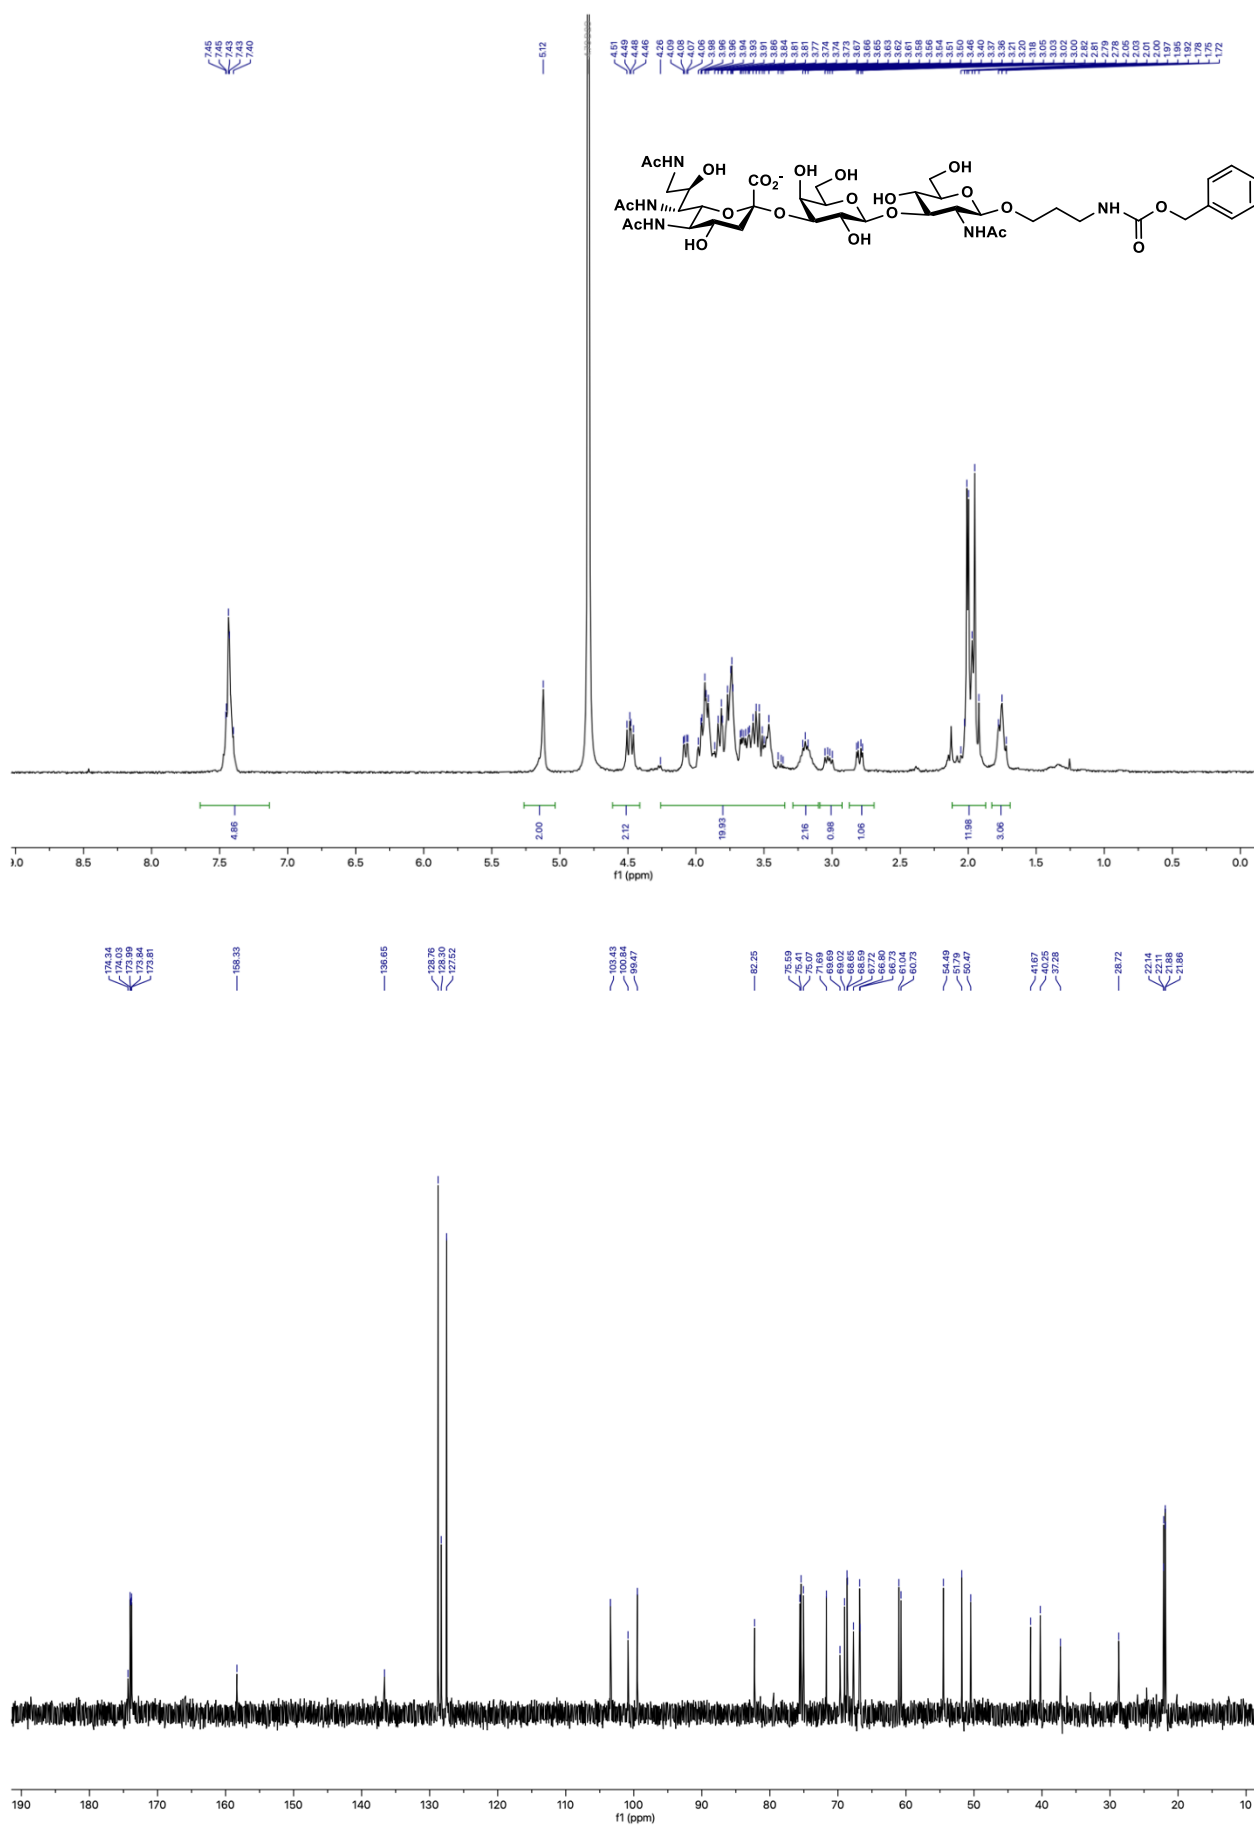

400 MHz  $^1\text{H}$  and 150 MHz  $^{13}\text{C}\{^1\text{H}\}$  NMR spectra of Neu5Ac7NAc $\alpha$ 2-6Gal $\beta$ 1-3GlcNAc $\beta$ ProNHCBz (**75**) in  $\text{D}_2\text{O}$

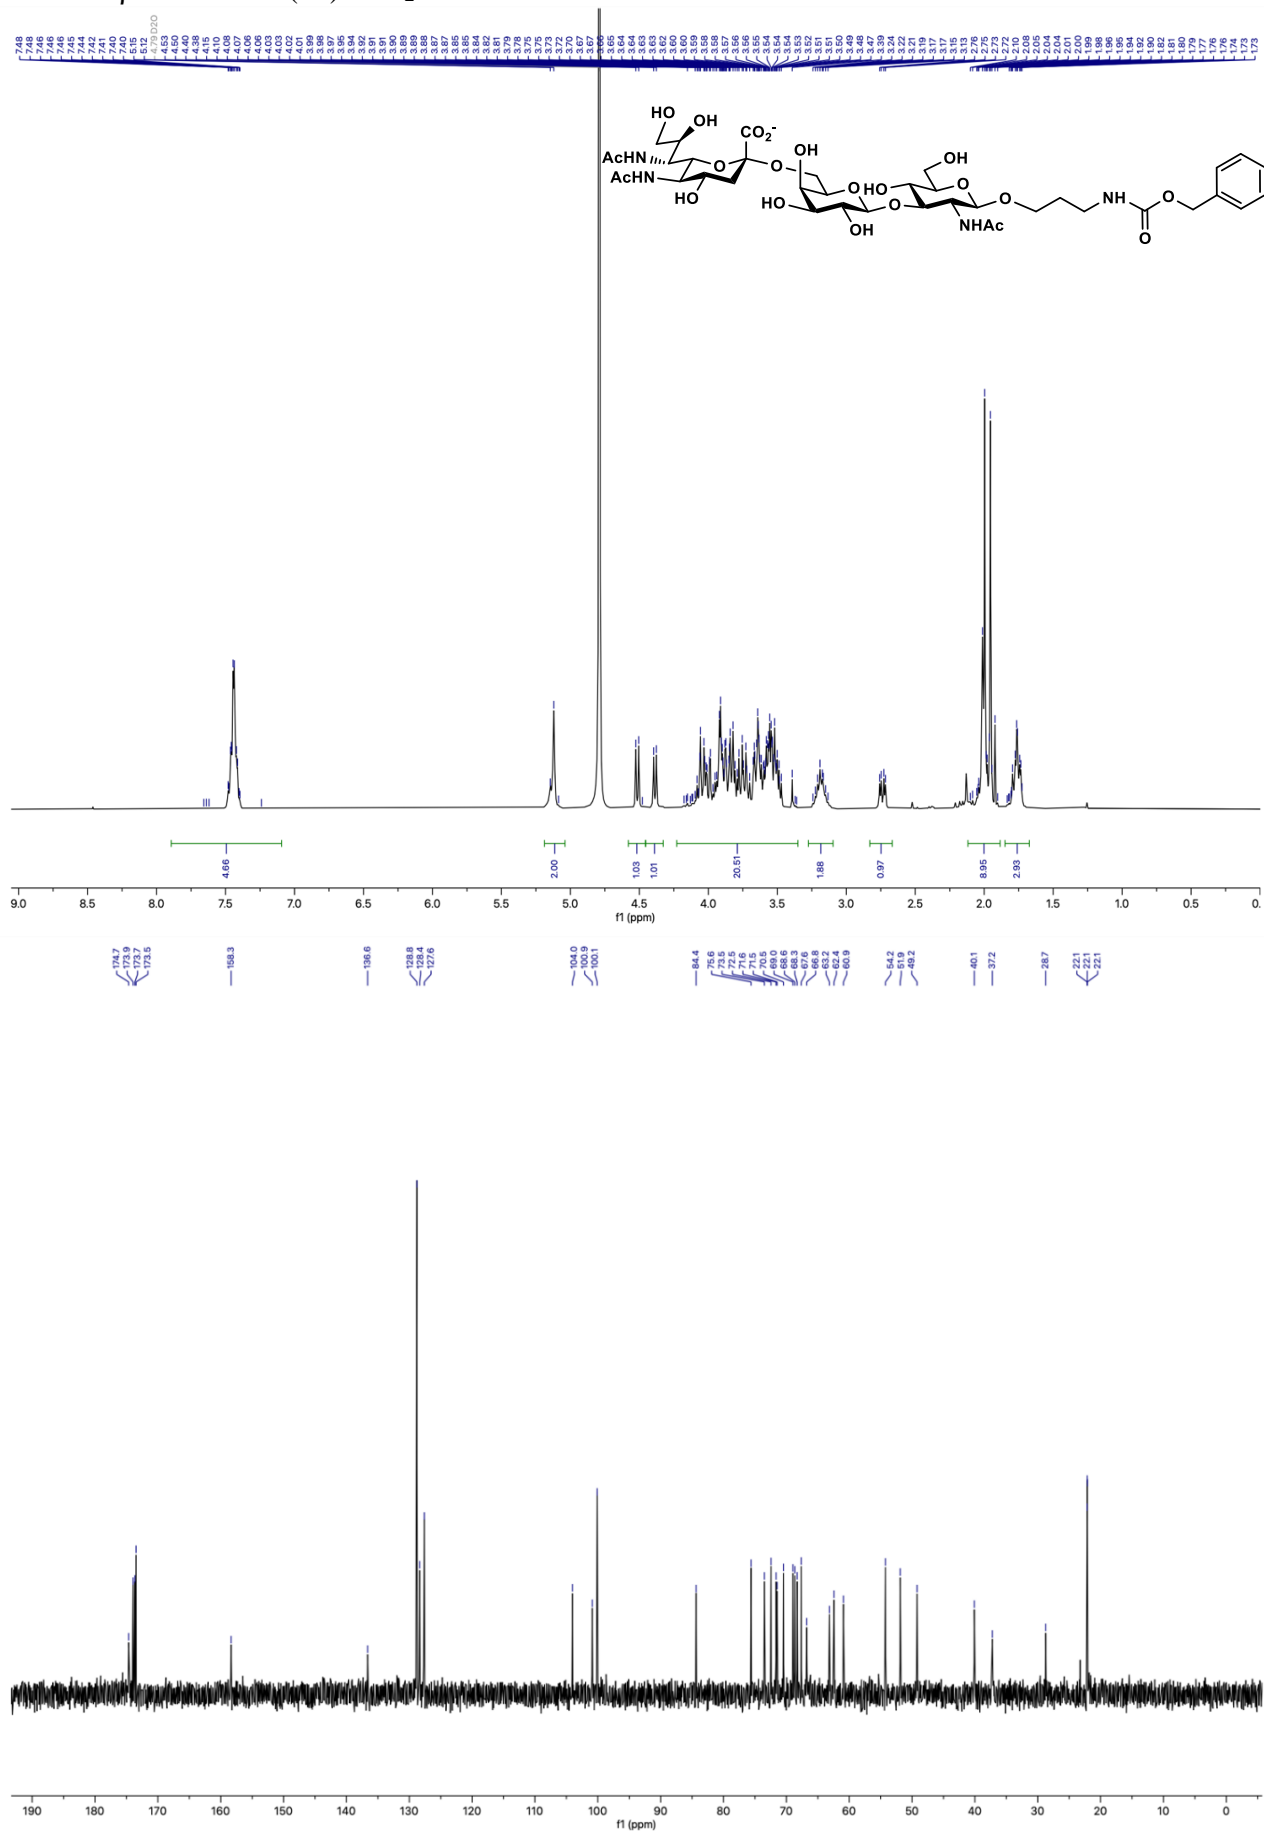

400 MHz  $^1\text{H}$  and 150 MHz  $^{13}\text{C}\{^1\text{H}\}$  NMR spectra of Neu5Ac7,9diNAc $\alpha$ 2-6Gal $\beta$ 1-3GlcNAc $\beta$ ProNHCBz (**76**) in  $\text{D}_2\text{O}$

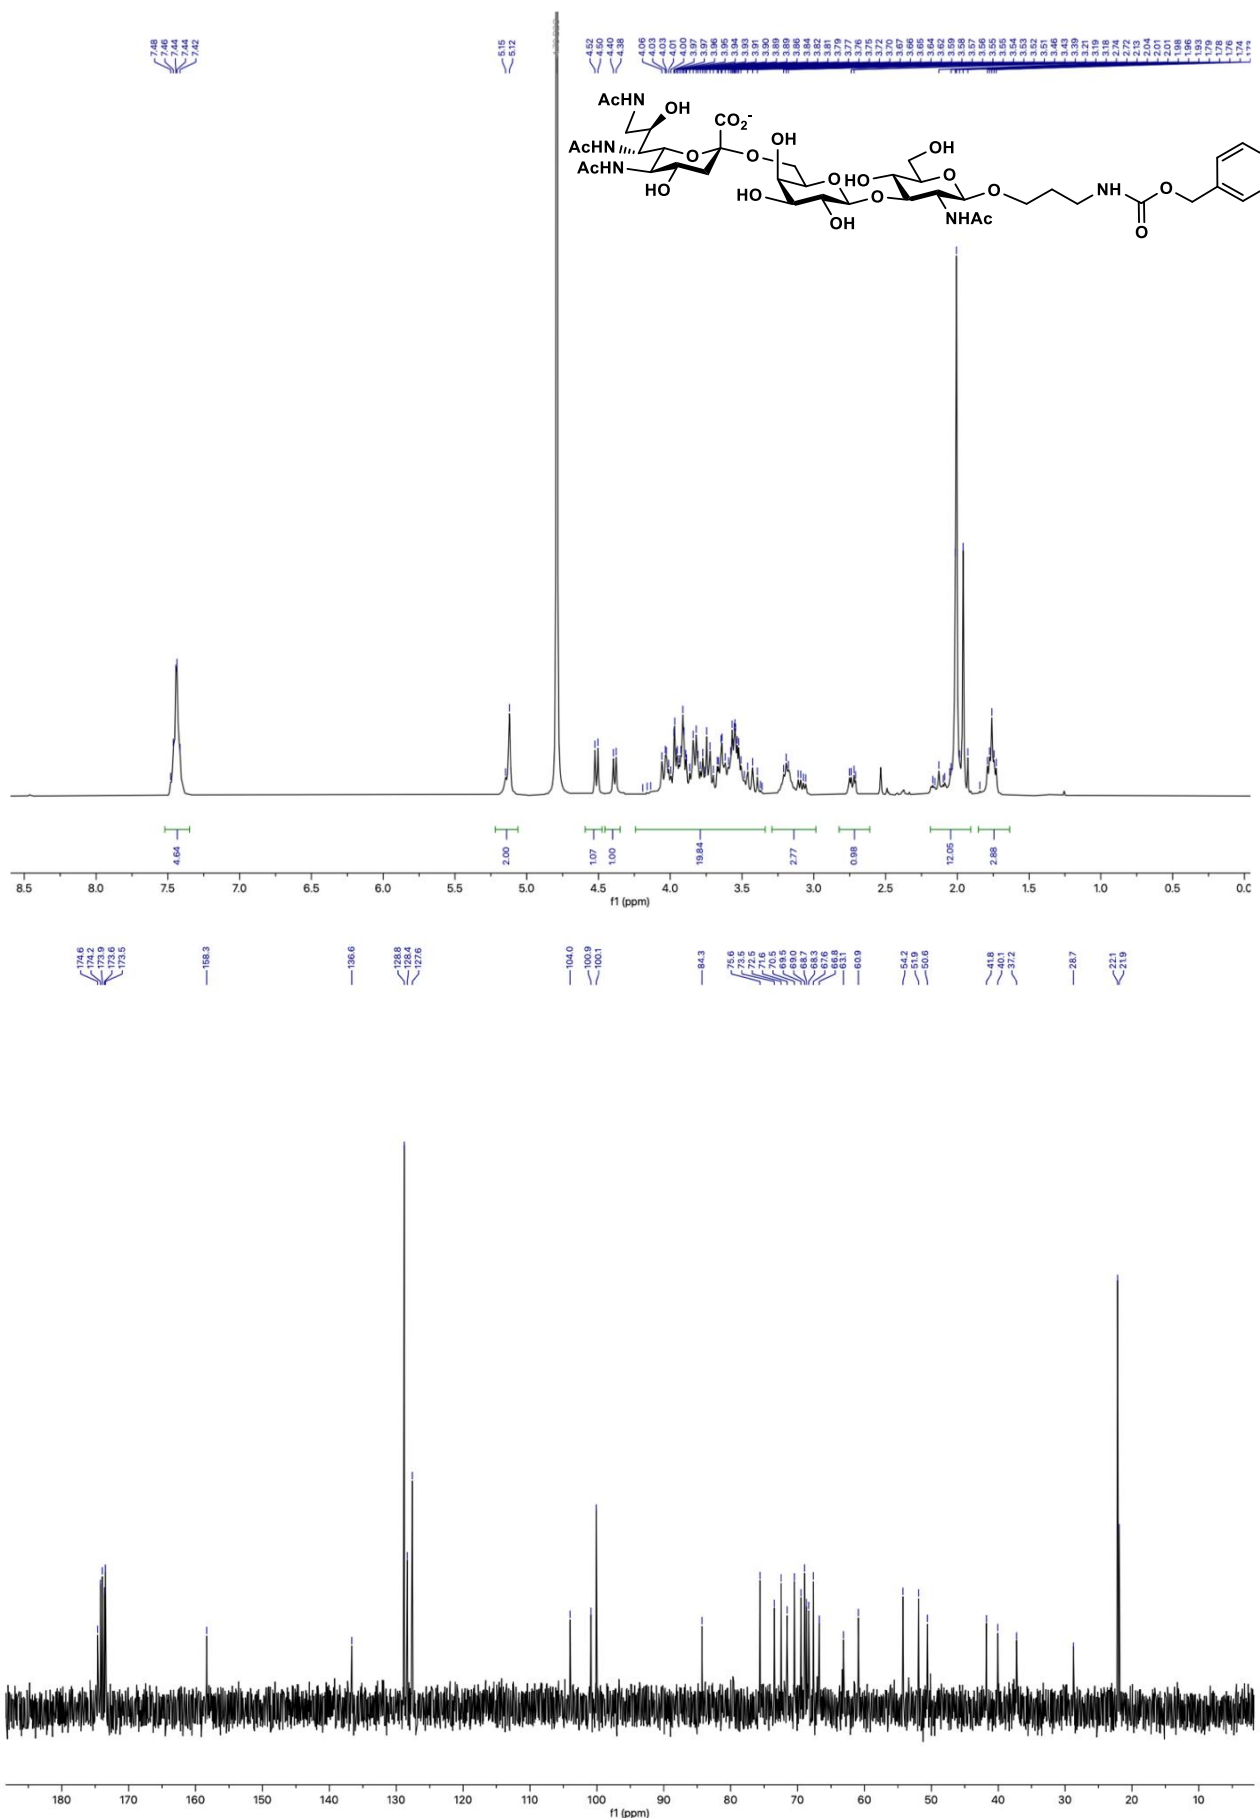



600 MHz  $^1\text{H}$  and 150 MHz  $^{13}\text{C}\{^1\text{H}\}$  NMR spectra of Neu5Ac7NAc $\alpha$ 2-3Gal $\beta$ 1-3GlcNAc $\alpha$ ProNHCbz (**77**) in  $\text{D}_2\text{O}$

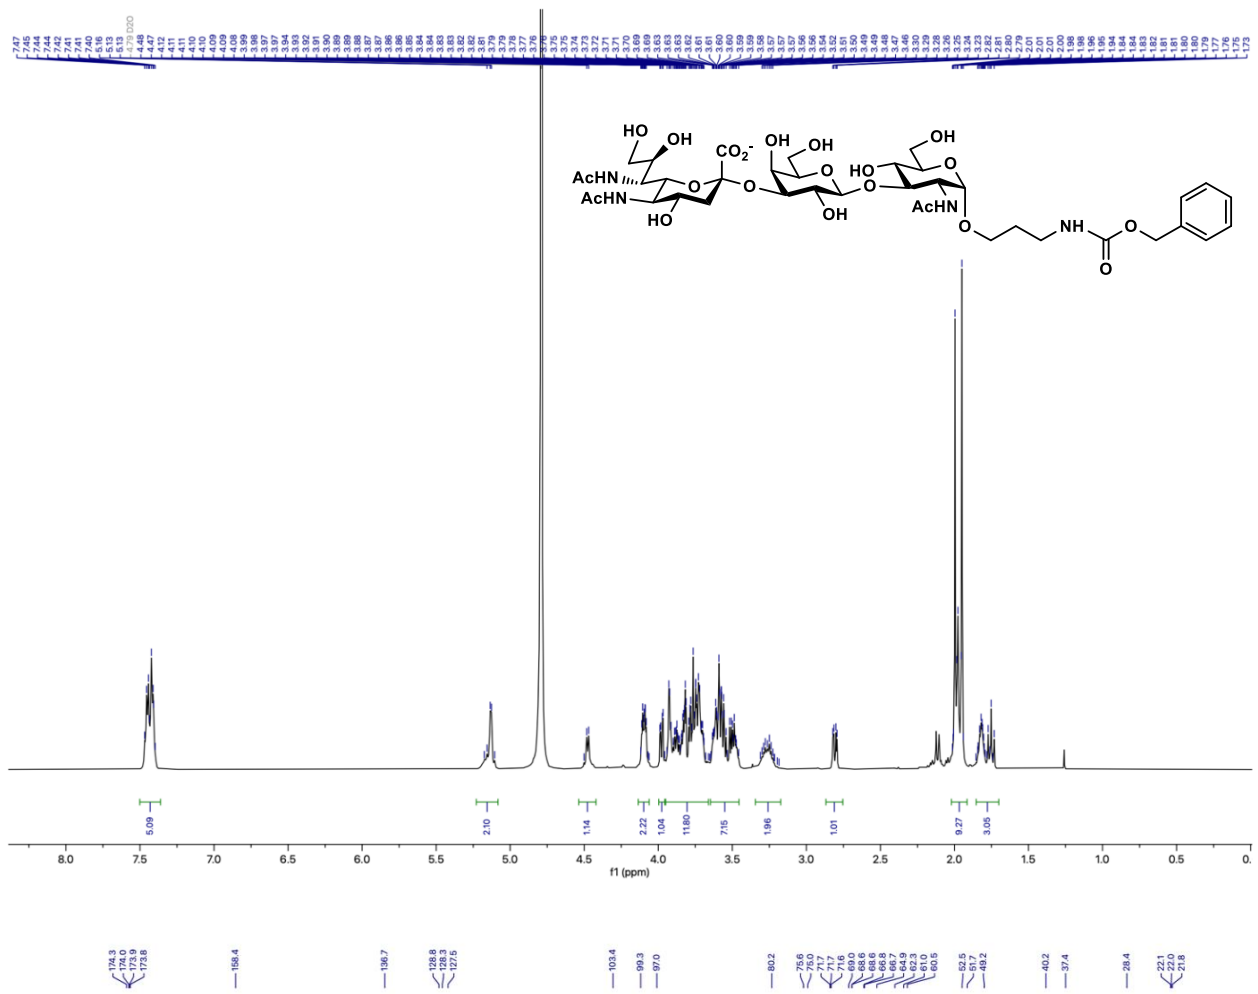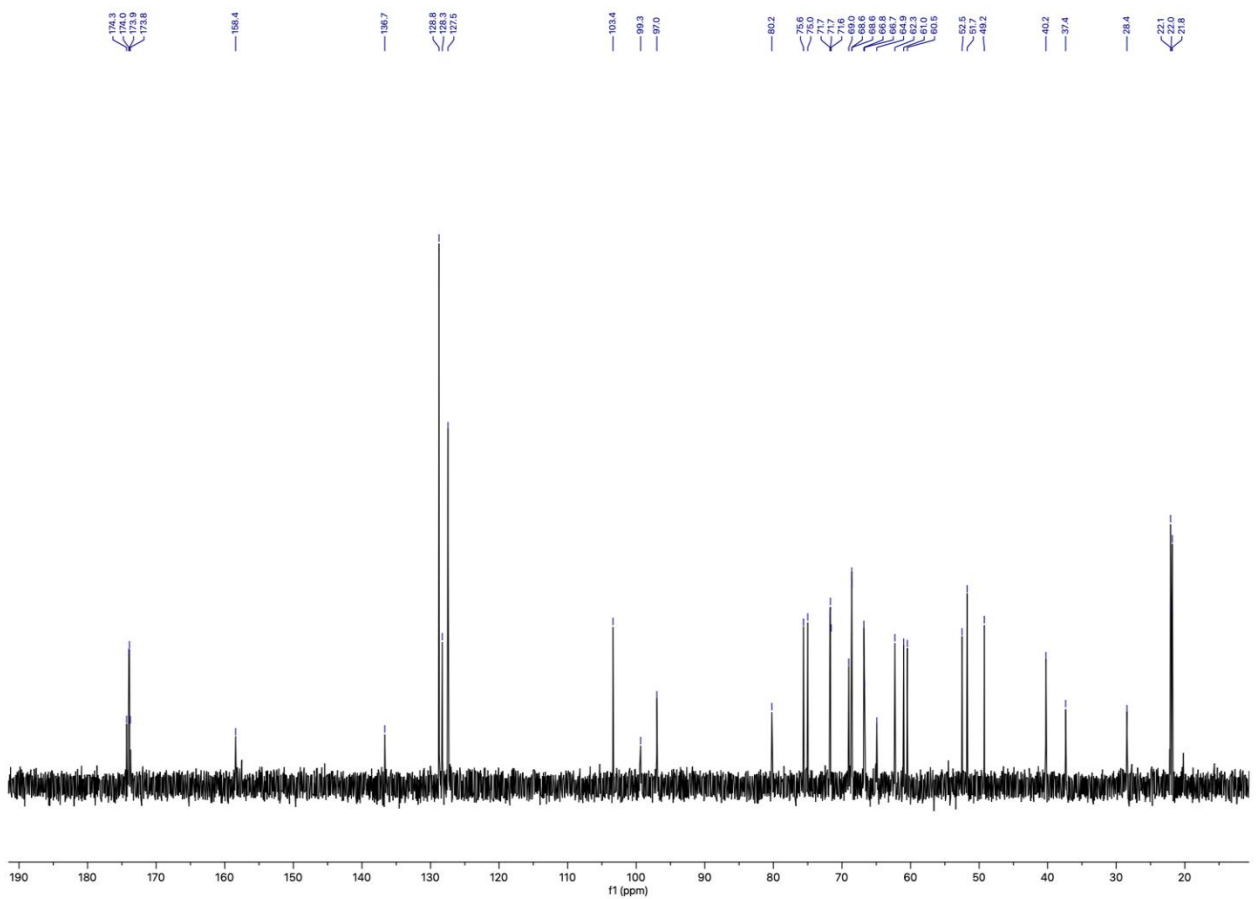

400 MHz  $^1\text{H}$  and 100 MHz  $^{13}\text{C}\{^1\text{H}\}$  NMR spectra of Neu5Ac7,9diNAc $\alpha$ 2-3Gal $\beta$ 1-3GlcNAc $\alpha$ ProNHCbz (**78**) in  $\text{D}_2\text{O}$

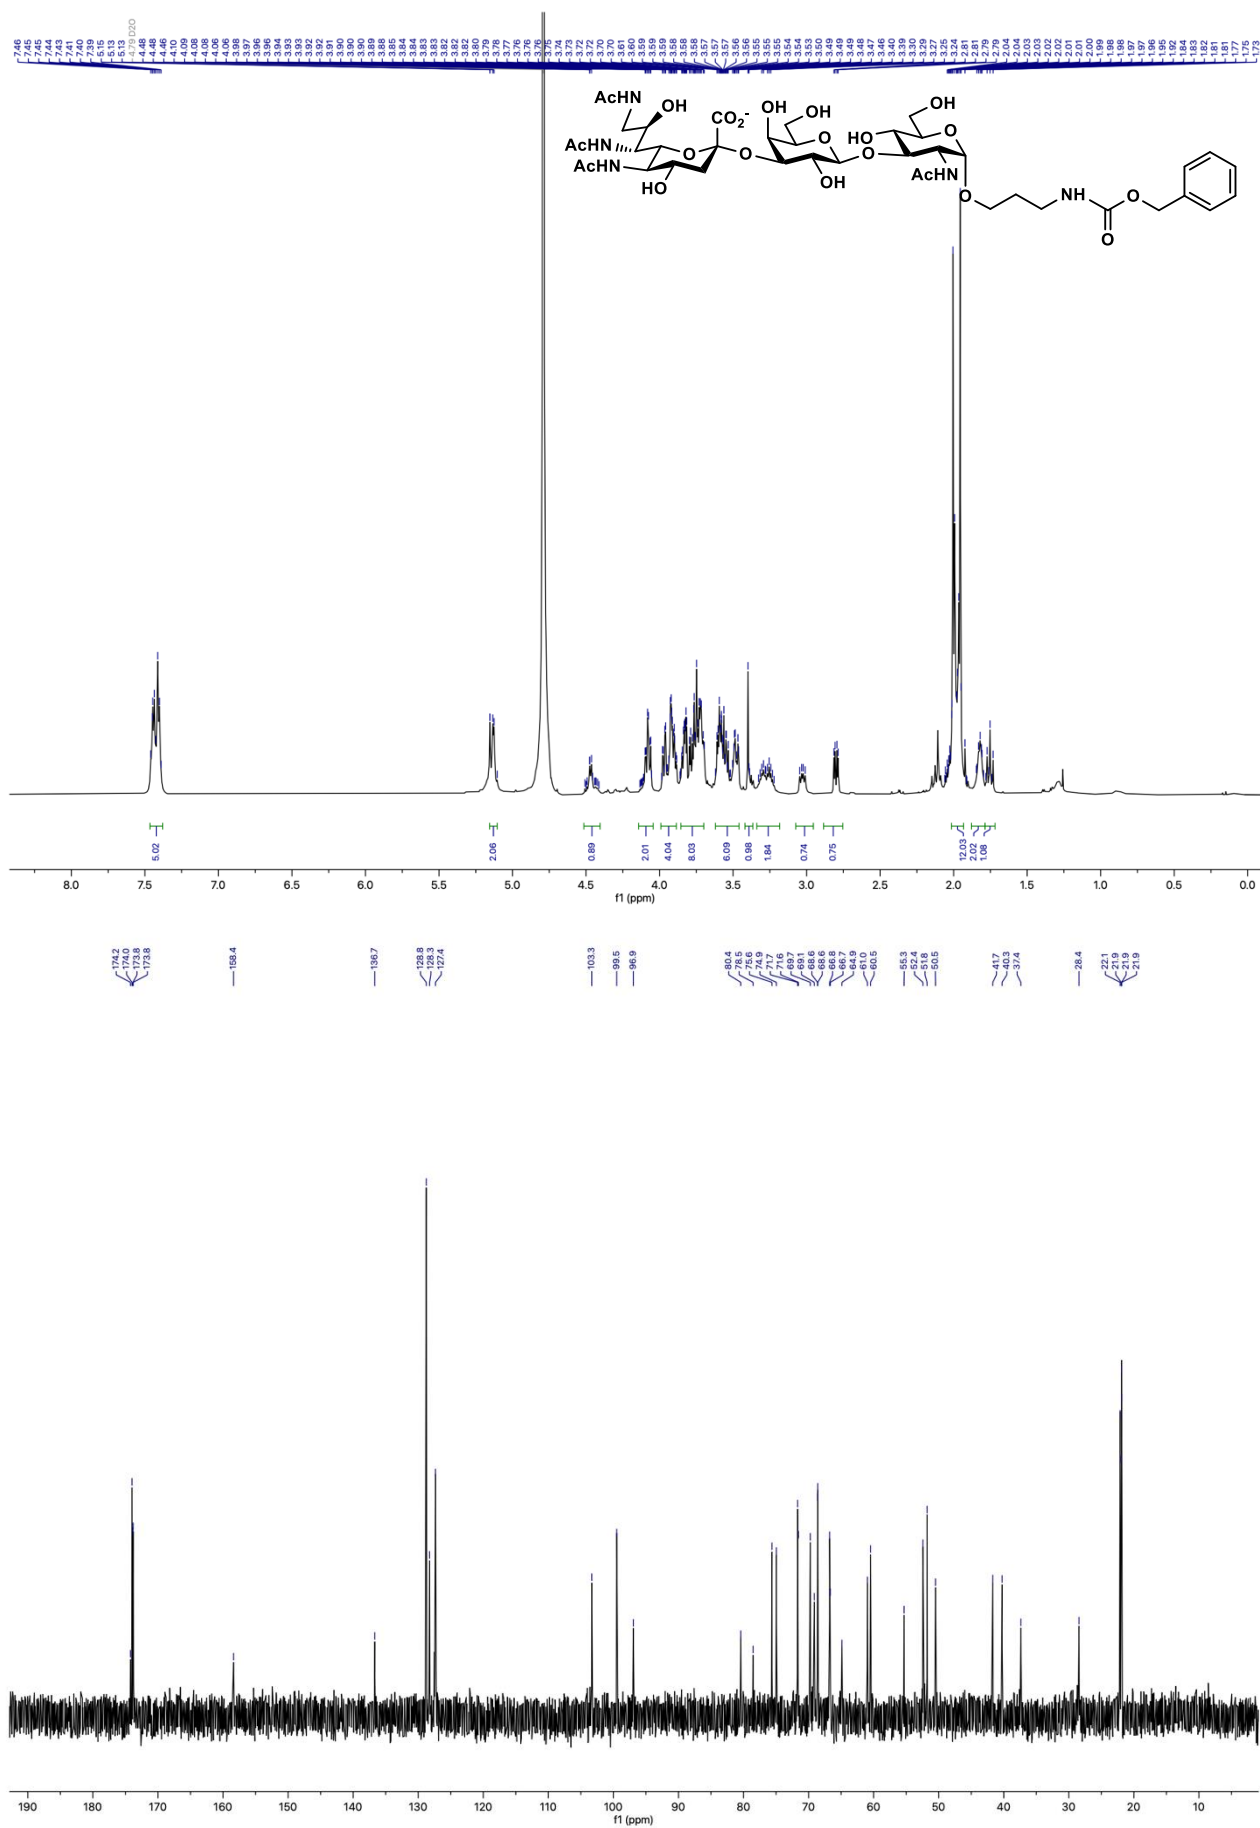

600 MHz  $^1\text{H}$  and 150 MHz  $^{13}\text{C}\{^1\text{H}\}$  NMR spectra of Neu5Ac7NAc $\alpha$ 2-6Gal $\beta$ 1-3GlcNAc $\alpha$ ProNHCbz (**79**) in  $\text{D}_2\text{O}$

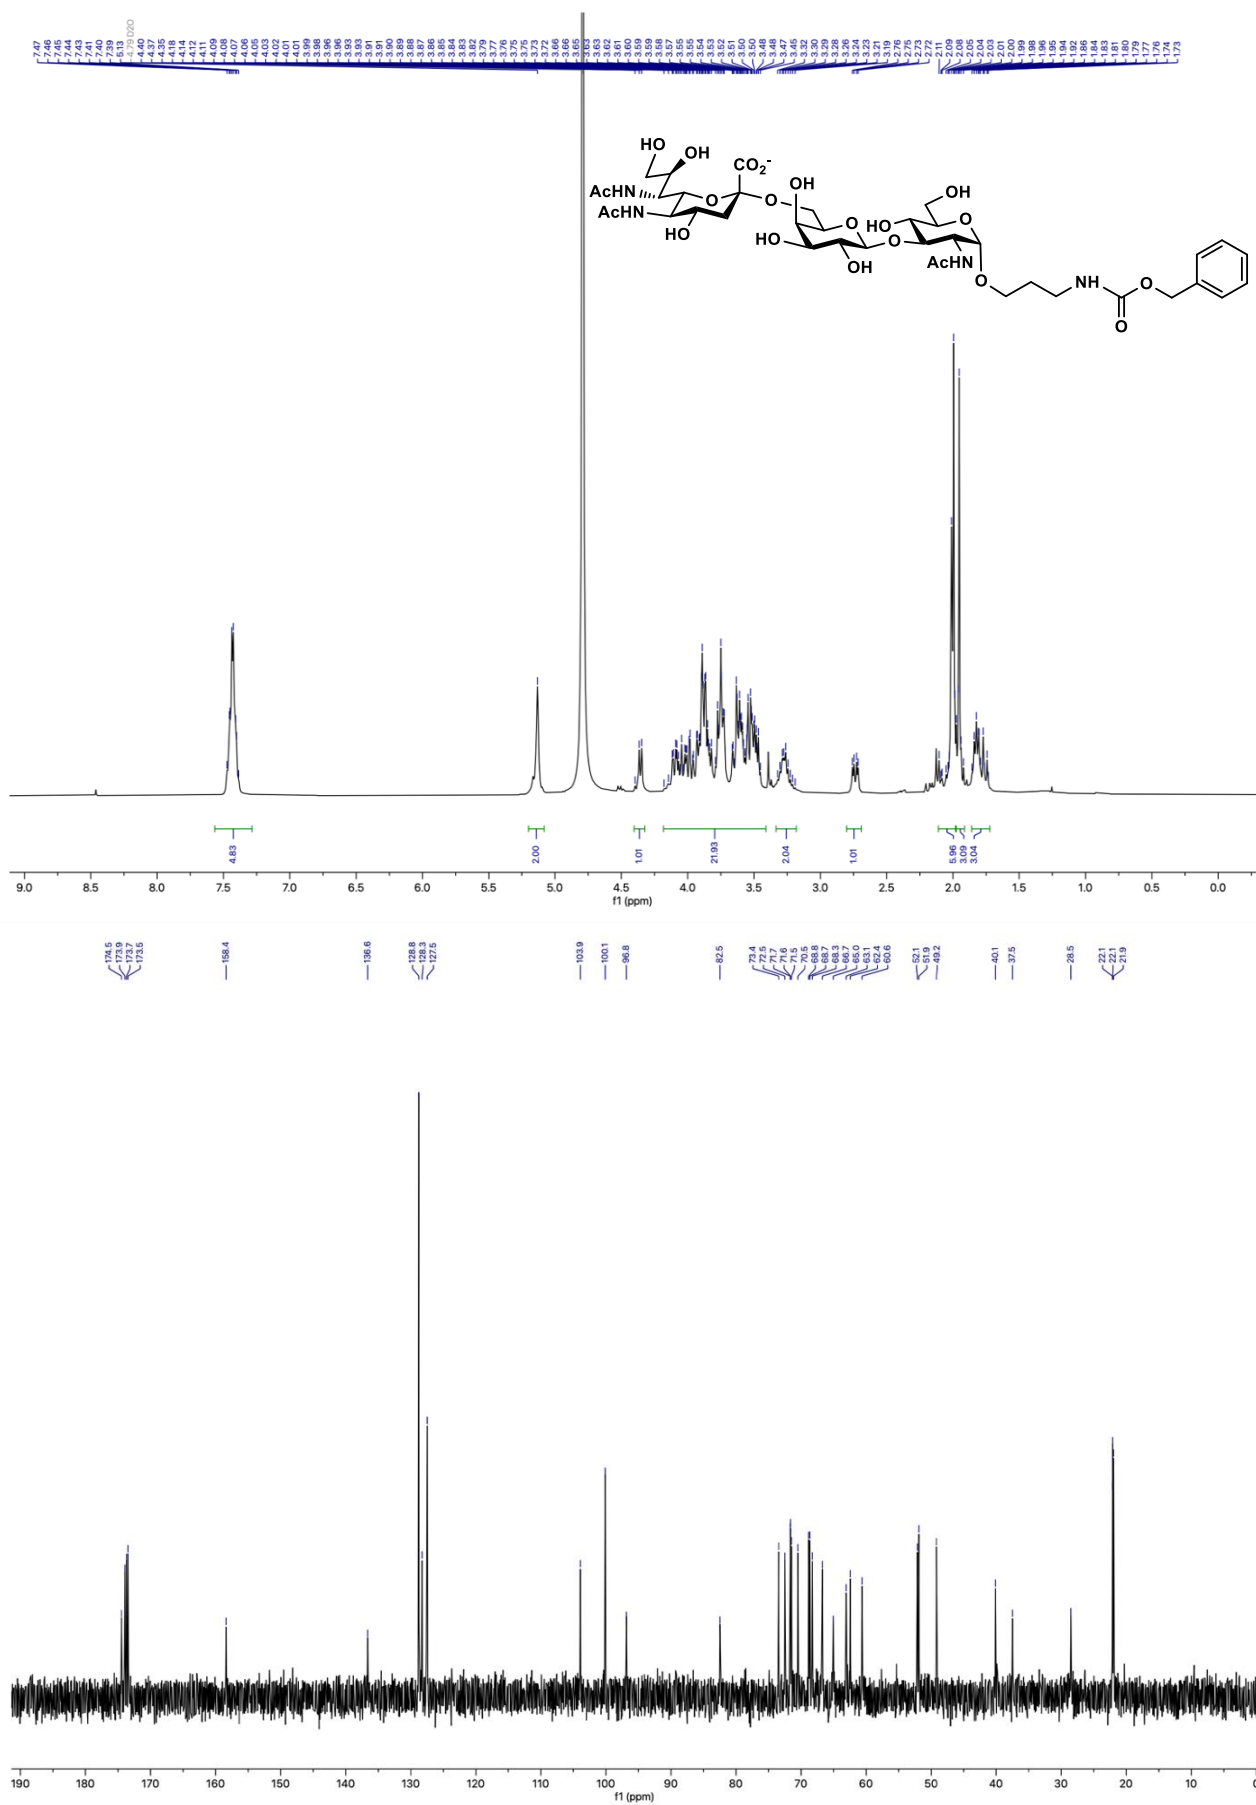

600 MHz  $^1\text{H}$  and 150 MHz  $^{13}\text{C}\{^1\text{H}\}$  NMR spectra of Neu5Ac7,9diNAc $\alpha$ 2-6Gal $\beta$ 1-3GlcNAc $\alpha$ ProNHCbz (**80**) in  $\text{D}_2\text{O}$

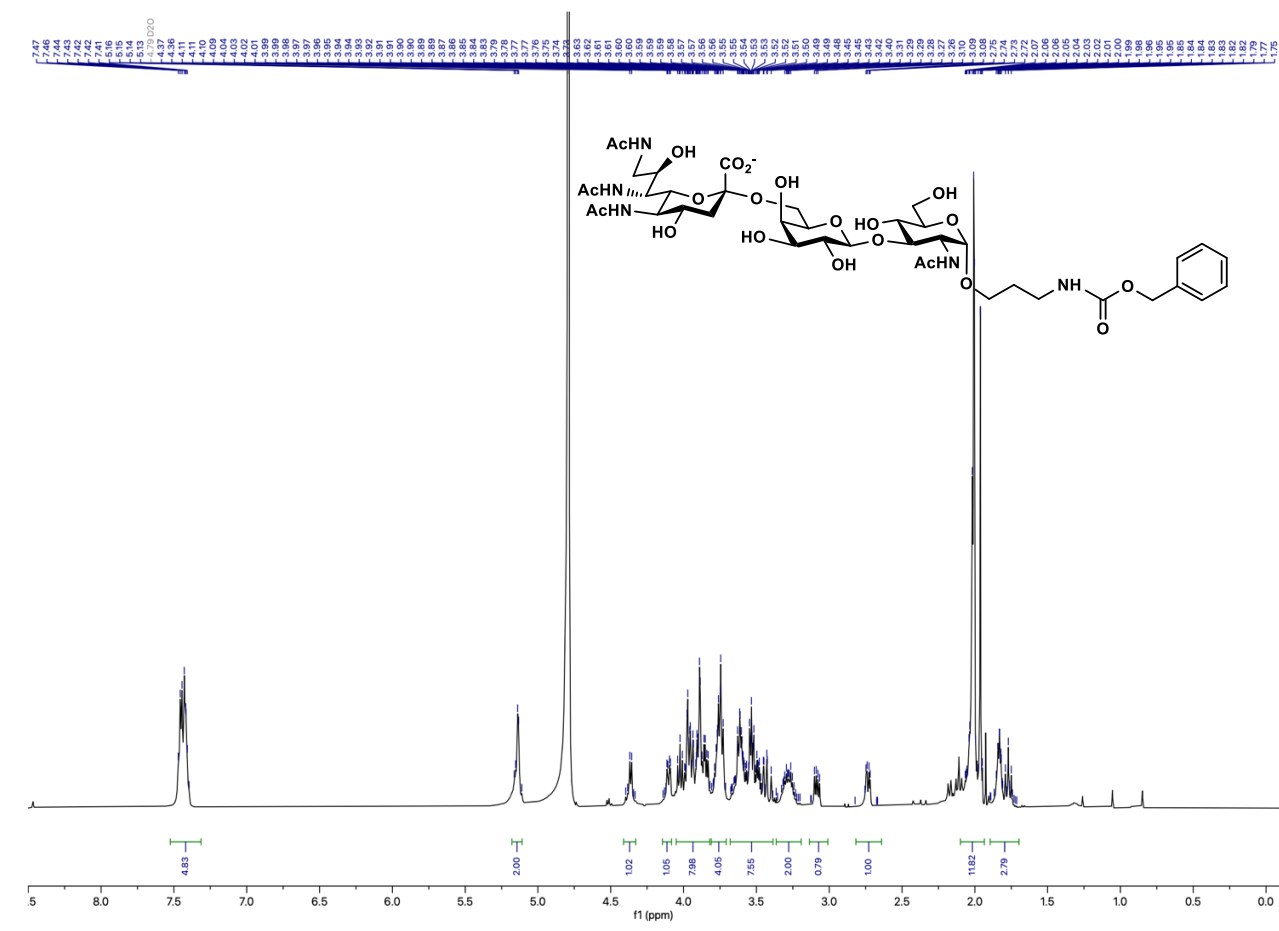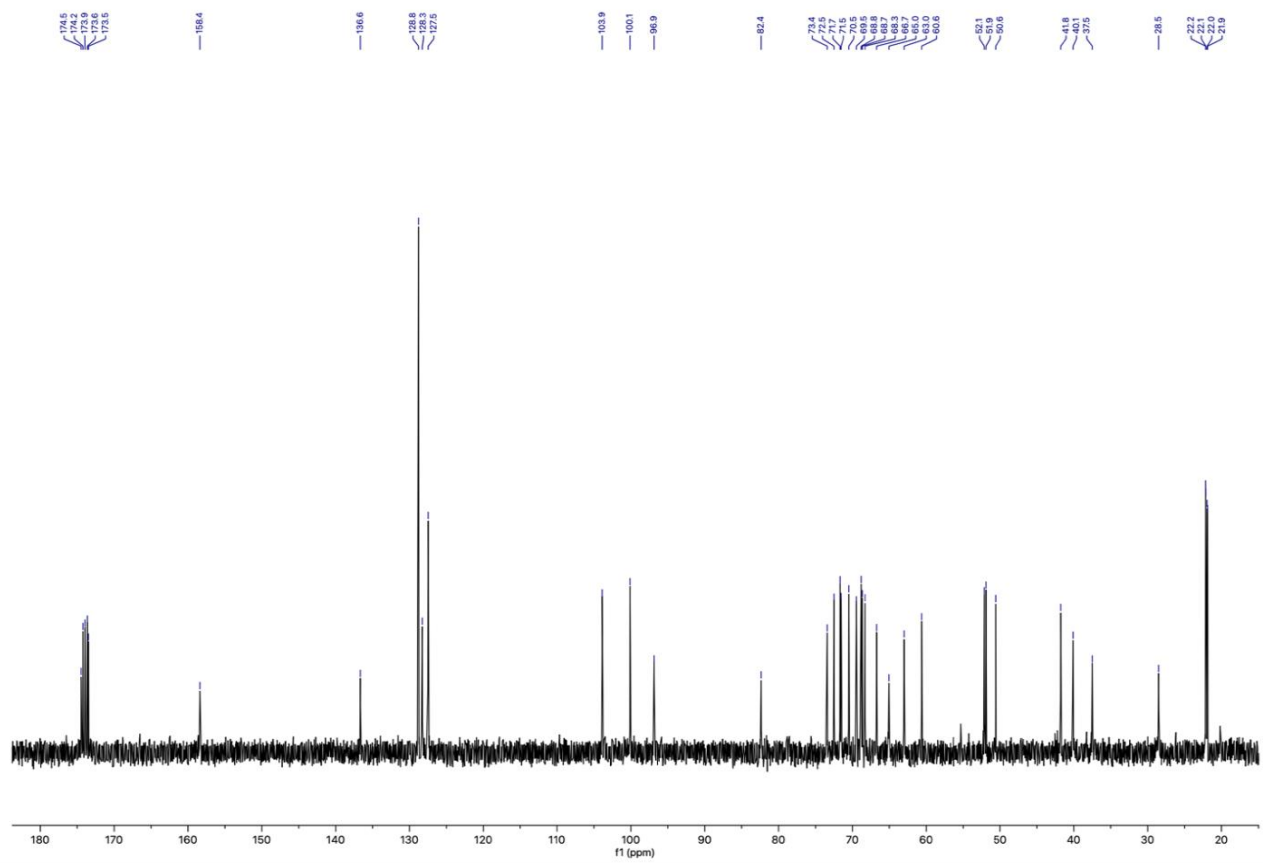

800 MHz  $^1\text{H}$  and 200 MHz  $^{13}\text{C}\{^1\text{H}\}$  NMR spectra of Neu5Ac7NAc $\alpha$ 2-6GalNAc $\alpha$ ProNHCbz (**81**) in  $\text{D}_2\text{O}$

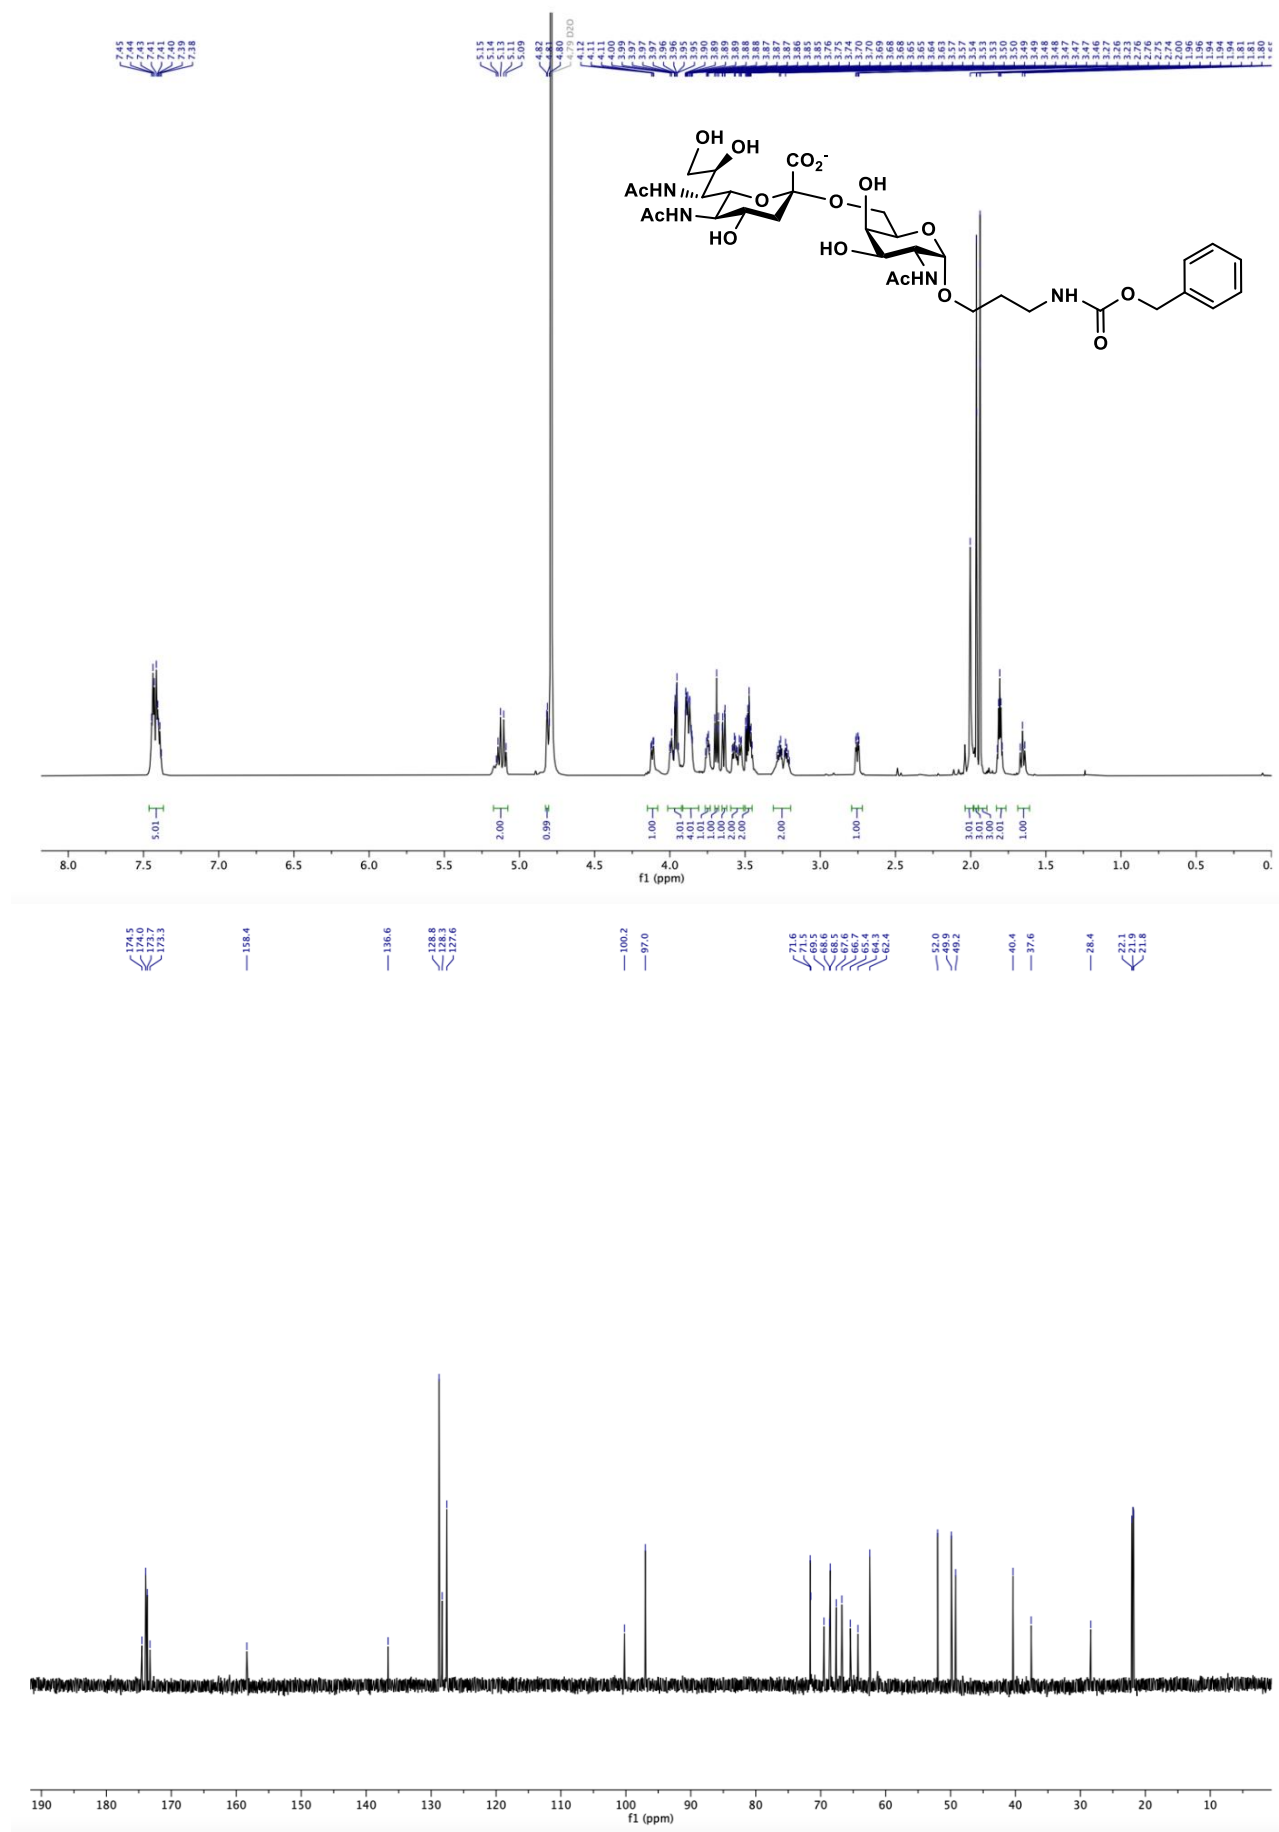

600 MHz  $^1\text{H}$  and 150 MHz  $^{13}\text{C}\{^1\text{H}\}$  NMR spectra of Neu5Ac7,9diNAc $\alpha$ 2-6GalNAc $\alpha$ ProNHCBz (**82**) in  $\text{D}_2\text{O}$

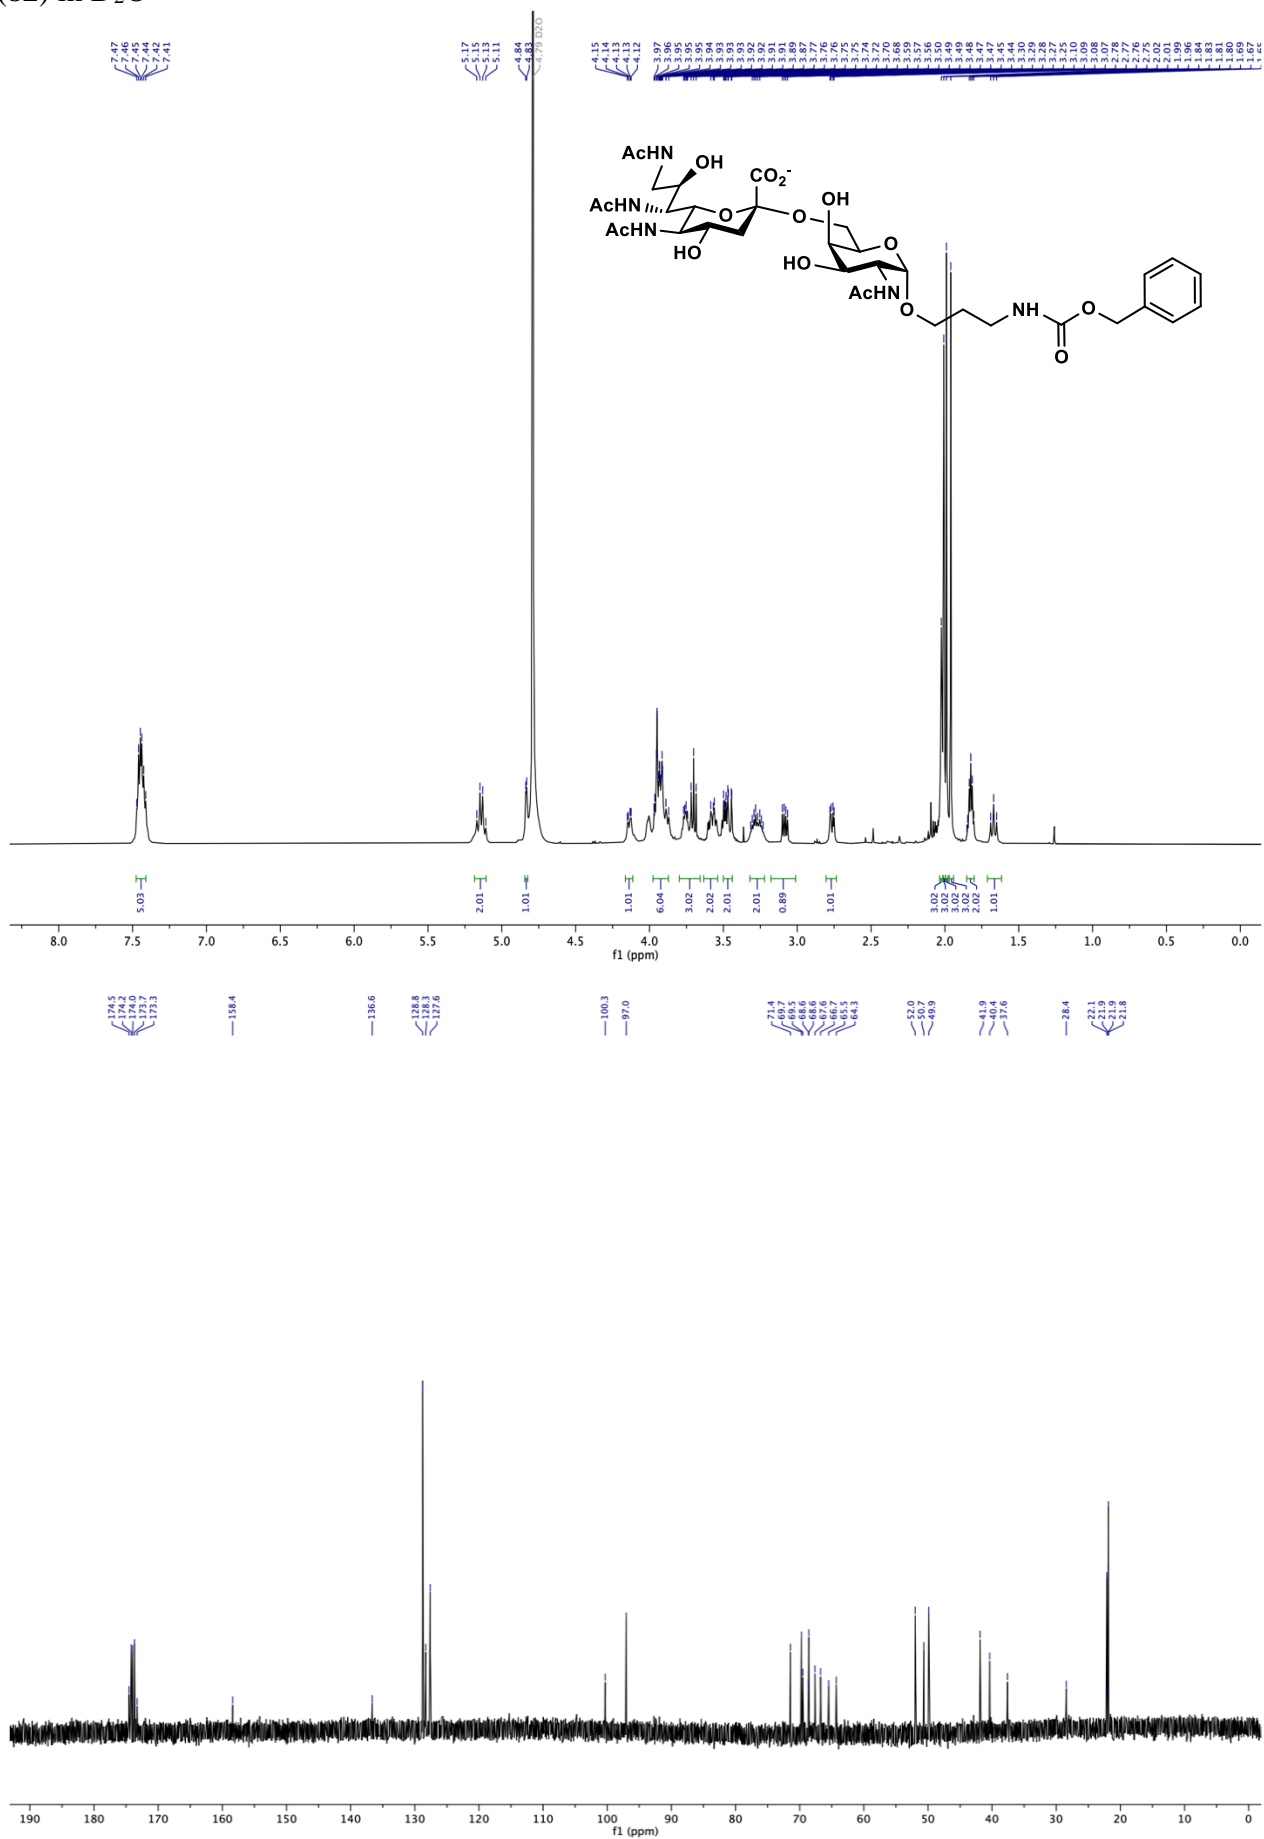

Supplement: NIHMS1817848-supplement-Supporting_Information.pdf [file NIHMS1817848-supplement-Supporting_Information.pdf]
